# Supplementary material for: SERPINB11 Frameshift Variant Associated with Novel Hoof Specific Phenotype in Connemara Ponies
Source: PLoS Genet. 2015 Apr 13;11(4):e1005122. doi: 10.1371/journal.pgen.1005122 (PMC4395385; doi:10.1371/journal.pgen.1005122)
Supplement: S4 Table — Highlighted (yellow) SNPs achieved genome-wide significance. The blue highlighted SNPs denote the region of homozygosity in HWSD-affected ponies. (XLSX) [file pgen.1005122.s004.xlsx]

## Sheet: Sheet1
			ID	CON44	CON45	CON70	CON1	CON19	CON25	CON30	CON2	CON26	CON31	CON3	CON22	CON32	CON24	CON29	CON6	CON15	CON40	CON7	CON11	CON20	CON37	CON41	CON13	CON17	CON27	CON38	CON42	CON9	CON18	CON34	CON43
			Sex	1	1	2	1	2	2	2	2	2	2	1	2	2	2	2	2	1	2	2	2	2	2	1	2	2	2	2	1	2	2	1	2
			HWSD	2	2	2	2	2	2	2	2	2	2	2	2	2	2	2	1	1	1	1	1	1	1	1	1	1	1	1	1	1	1	1	1
8	8_39072	0	39072	G G	A G	G G	A G	G G	G G	G G	G G	G G	G G	G G	A G	G G	A G	G G	A G	G G	G G	G G	G G	A G	A G	G G	G G	G G	G G	A G	G G	G G	G G	A G	G G
8	8_133552	0	133552	G G	A G	G G	G G	G G	G G	G G	G G	G G	G G	G G	G G	G G	G G	G G	G G	G G	G G	G G	G G	A G	A G	G G	G G	G G	G G	G G	G G	G G	G G	A G	G G
8	8_175722	0	175722	A A	A A	G A	A A	G A	G G	G A	A A	G A	G A	A A	A A	A A	A A	A A	A A	A A	A A	G A	A A	A A	A A	G G	A A	A A	G A	A A	A A	A A	G A	G A	G A
8	8_242392	0	242392	A A	A A	G A	A A	G A	G A	A A	A A	G A	A A	A A	A A	A A	A A	A A	A A	A A	A A	A A	G A	A A	A A	G A	A A	A A	G A	A A	A A	A A	A A	G A	A A
8	8_262184	0	262184	G G	G G	A G	G G	A G	A G	G G	G G	G G	G G	G G	G G	G G	G G	G G	G G	G G	G G	G G	G G	G G	G G	A G	G G	G G	G G	G G	G G	G G	G G	A G	G G
8	8_285205	0	285205	C C	C C	T C	C C	T C	T C	C C	C C	C C	C C	C C	C C	C C	C C	C C	C C	C C	C C	C C	C C	C C	C C	T C	C C	C C	C C	C C	C C	C C	C C	T C	C C
8	8_304503	0	304503	C C	C C	T C	C C	T C	T C	C C	C C	C C	C C	C C	C C	C C	C C	C C	C C	C C	C C	C C	C C	C C	C C	T C	C C	C C	C C	C C	C C	C C	C C	T C	C C
8	8_423109	0	423109	T T	T T	T T	0 0	T T	T T	T T	T T	T T	T T	T T	0 0	T T	0 0	T T	0 0	T T	T T	T T	T T	C T	T T	T T	T T	T T	T T	T T	T T	T T	T T	T T	T T
8	8_494896	0	494896	A G	A G	A A	A G	A G	A A	A G	A G	A G	A A	G G	A G	A G	A G	G G	A G	G G	A G	A G	G G	G G	A A	A A	G G	A G	A G	A G	A A	A G	A G	A A	A G
8	8_549675	0	549675	A A	G A	G A	A A	G A	G G	G A	A A	A A	A A	A A	A A	A A	A A	A A	A A	A A	A A	G A	A A	A A	A A	G G	A A	A A	A A	A A	G A	A A	G A	G G	G A
8	8_607467	0	607467	A G	G G	G G	G G	G G	G G	G G	G G	G G	G G	G G	G G	G G	G G	G G	G G	G G	A G	G G	G G	A G	A G	G G	G G	G G	G G	G G	A G	G G	G G	G G	G G
8	8_622386	0	622386	G G	G G	G G	G G	G G	G G	A G	G G	G G	A G	G G	G G	G G	G G	A G	G G	A G	A G	G G	A G	G G	A G	G G	A G	G G	G G	A G	G G	G G	G G	G G	G G
8	8_683647	0	683647	C C	A C	A C	C C	A C	C C	A C	A C	A C	A C	A C	C C	A C	C C	A C	C C	C C	C C	A C	C C	A C	A C	A C	C C	C C	C C	A C	C C	C C	C C	A C	A C
8	8_778488	0	778488	T T	T T	T T	T T	T T	T T	T T	T T	T T	T T	T T	T T	T T	T T	T T	T T	T T	T T	T T	T T	G T	T T	T T	T T	T T	T T	T T	T T	T T	T T	T T	T T
8	8_830380	0	830380	C C	T C	C C	C C	T C	T T	C C	C C	C C	C C	C C	C C	0 0	C C	C C	C C	C C	C C	C C	T C	C C	C C	T C	C C	C C	C C	C C	T C	C C	C C	T T	T C
8	8_862934	0	862934	A A	A A	A A	G A	G A	A A	A A	G A	A A	G A	G G	A A	G A	G A	A A	G A	A A	A A	G A	G A	G G	A A	A A	G A	A A	A A	G A	A A	G A	A A	A A	G A
8	8_881709	0	881709	A G	A G	A G	G G	A G	A A	A G	G G	G G	G G	G G	G G	G G	G G	G G	G G	G G	A G	A G	A G	G G	A G	A G	G G	G G	G G	A G	A A	G G	A G	A A	A G
8	8_895647	0	895647	T G	T G	T G	G G	T G	T T	T G	G G	G G	G G	G G	G G	G G	G G	G G	G G	G G	T G	T G	T G	G G	T G	T G	G G	G G	G G	T G	T T	G G	T G	T T	T G
8	8_942506	0	942506	A A	A A	G A	A A	A A	A A	G G	A A	A A	A A	A A	A A	A A	A A	G A	A A	G A	G A	G A	A A	A A	A A	G A	G A	A A	A A	A A	A A	A A	G A	A A	A A
8	8_953284	0	953284	T T	G T	T T	T T	G T	G G	T T	T T	T T	T T	T T	T T	T T	T T	T T	T T	T T	T T	T T	G T	T T	T T	G T	T T	T T	T T	T T	T T	T T	T T	G G	G T
8	8_956342	0	956342	A G	G G	G G	G G	G G	G G	G G	G G	G G	G G	G G	G G	G G	G G	G G	G G	G G	A G	G G	G G	G G	A A	G G	G G	G G	G G	A G	A G	G G	G G	G G	G G
8	8_1039268	0	1039268	G G	A G	G G	G G	A G	A A	G G	G G	G G	G G	G G	G G	G G	G G	G G	G G	G G	G G	G G	A G	G G	G G	A G	G G	G G	G G	G G	G G	G G	G G	A A	A G
8	8_1058058	0	1058058	A G	A G	A G	A G	A G	A A	G G	G G	A G	G G	G G	A A	G G	A G	A G	A G	A G	A G	G G	A G	A G	A A	A G	G G	A G	A G	A G	A G	G G	A G	A A	A G
8	8_1137565	0	1137565	C C	T C	C C	C C	T C	C C	C C	C C	C C	C C	C C	C C	C C	C C	C C	C C	C C	C C	C C	C C	C C	C C	C C	C C	C C	C C	C C	C C	C C	C C	T C	C C
8	8_1137655	0	1137655	T T	C T	T T	T T	C T	T T	T T	T T	T T	T T	T T	T T	T T	T T	T T	T T	T T	T T	T T	T T	T T	T T	T T	T T	T T	T T	T T	T T	T T	T T	C T	T T
8	8_1194504	0	1194504	T C	T C	T C	T C	T C	C C	C C	C C	T C	T C	T C	T C	T C	T C	T C	T C	T C	T C	T C	T C	T C	T C	C C	T C	T C	T C	T T	T T	T C	T C	T C	T C
8	8_1198811	0	1198811	C C	C C	C C	C C	C C	C C	C C	C C	C C	C C	C C	C C	C C	C C	C C	C C	C C	C C	C C	C C	C C	C C	C C	C C	C C	C C	C C	C C	C C	C C	C C	C C
8	8_1216371	0	1216371	G G	A G	G G	G G	A G	G G	G G	G G	G G	G G	G G	G G	G G	G G	G G	G G	G G	G G	G G	G G	G G	G G	G G	G G	G G	G G	G G	G G	G G	G G	A G	G G
8	8_1291607	0	1291607	T T	C T	C T	T T	C C	T T	C T	C T	C T	T T	C T	C T	T T	T T	C T	T T	C T	T T	C T	T T	C C	C T	C T	T T	C T	C T	C T	T T	T T	C T	C T	T T
8	8_1335431	0	1335431	G G	G G	G G	G G	G G	G G	G G	G G	A G	G G	G G	A G	G G	G G	A G	G G	A G	G G	G G	G G	G G	G G	G G	G G	A G	A G	G G	G G	G G	G G	G G	G G
8	8_1339507	0	1339507	C C	C C	C C	C C	C C	C C	T C	C C	T C	C C	C C	C C	C C	C C	T C	C C	T C	T C	C C	T C	T C	T C	C C	T C	C C	T C	C C	C C	C C	C C	C C	C C
8	8_1347166	0	1347166	A C	C C	A C	C C	C C	C C	C C	A C	C C	C C	C C	C C	C C	C C	C C	C C	C C	A C	C C	C C	C C	A C	A C	C C	A C	C C	C C	A C	A C	C C	C C	C C
8	8_1437182	0	1437182	C C	C C	C C	C C	C C	C C	C C	C C	T C	C C	C C	T C	C C	C C	T C	C C	T C	C C	C C	C C	C C	C C	C C	C C	T C	T C	T C	C C	C C	C C	C C	C C
8	8_1514962	0	1514962	G G	G A	G A	A A	A A	A A	A A	A A	G A	G A	A A	G A	G A	A A	G A	A A	G A	G A	A A	A A	A A	G A	A A	A A	G A	G A	A A	G A	A A	A A	A A	A A
8	8_1605702	0	1605702	C C	C C	C C	C C	C C	C C	C C	C C	A C	C C	C C	A C	C C	C C	A C	C C	0 0	C C	C C	C C	C C	C C	C C	C C	A C	A C	C C	C C	C C	C C	C C	C C
8	8_1675761	0	1675761	G G	G G	G G	G G	G G	G G	G G	A G	G G	G G	G G	G G	G G	G G	G G	G G	G G	G G	G G	G G	G G	A G	G G	G G	A G	G G	G G	G G	A G	G G	G G	G G
8	8_1807808	0	1807808	A A	A A	G A	G G	A A	A A	A A	G A	A A	G A	G A	G A	G G	G G	A A	G G	A A	A A	G A	G A	G A	G A	A A	G A	G A	A A	G G	G A	G G	G A	A A	G A
8	8_1818604	0	1818604	0 0	C C	0 0	T T	C C	C C	C C	T C	T C	T C	T C	T T	T T	T T	T C	T T	T C	C C	T C	T C	T C	T T	C C	T C	T T	T C	T T	T T	T T	T C	C C	T C
8	8_1900447	0	1900447	A G	G G	G G	G G	G G	G G	A G	G G	G G	G G	G G	G G	G G	G G	A G	G G	A G	A A	G G	G G	G G	A G	G G	A G	G G	G G	G G	A G	G G	G G	G G	G G
8	8_1998191	0	1998191	G T	T T	T T	T T	T T	T T	G T	T T	T T	T T	T T	T T	T T	T T	G T	T T	G T	G G	T T	T T	T T	G T	T T	G T	T T	T T	T T	G T	T T	T T	T T	T T
8	8_2115370	0	2115370	T G	G G	G G	G G	G G	G G	T G	G G	G G	G G	G G	G G	G G	G G	T G	G G	T G	0 0	G G	G G	G G	T G	G G	T G	G G	G G	G G	T G	G G	G G	G G	G G
8	8_2213144	0	2213144	A A	G A	0 0	G A	G A	A A	A A	A A	G A	G A	A A	G A	A A	G A	A A	G A	A A	A A	A A	A A	A A	A A	G A	A A	A A	G A	A A	A A	A A	A A	G A	A A
8	8_2419300	0	2419300	T C	C C	C C	C C	C C	C C	T C	C C	T C	C C	C C	T C	C C	C C	T C	C C	T C	T C	C C	T C	C C	T C	C C	T C	T C	T C	C C	T C	C C	C C	C C	C C
8	8_2489368	0	2489368	C C	C C	C C	C C	C C	C C	T C	T C	C C	T C	C C	C C	T C	C C	C C	C C	C C	C C	T C	C C	C C	T C	C C	C C	T C	C C	C C	C C	T C	T C	C C	C C
8	8_2608511	0	2608511	C T	T T	C T	C T	C T	C T	C T	C T	T T	C T	C T	C T	C T	C T	C T	C T	C T	C C	T T	T T	C T	C C	T T	C T	T T	T T	T T	C T	T T	T T	C T	T T
8	8_2668099	0	2668099	T C	T T	T C	C C	T T	C C	T C	T C	T T	T C	T C	T C	T C	C C	T C	C C	T C	C C	T C	C C	T T	C C	T C	C C	T C	T T	C C	C C	C C	T C	T C	C C
8	8_2712508	0	2712508	C C	C C	A C	C C	C C	A C	C C	C C	C C	C C	C C	C C	C C	C C	C C	C C	C C	C C	C C	A C	C C	C C	C C	C C	C C	C C	C C	C C	C C	C C	A C	C C
8	8_2722892	0	2722892	T C	T C	T C	C C	T T	C C	T T	T C	T C	T C	T C	C C	T C	C C	T C	C C	T C	T T	T C	C C	T C	T C	T C	T C	C C	T C	C C	T C	C C	T C	T C	C C
8	8_2760697	0	2760697	A G	A G	A G	G G	A A	G G	A A	A G	A G	A G	A G	G G	A G	G G	A G	G G	A G	A A	A G	G G	A G	A G	A G	A G	G G	A G	G G	A G	G G	A G	A G	G G
8	8_2897484	0	2897484	C C	C C	T C	C C	C C	C C	T C	C C	T C	C C	C C	T C	C C	C C	T C	C C	T C	C C	T T	T T	C C	C C	C C	C C	T C	T C	C C	C C	C C	T T	C C	C C
8	8_2955972	0	2955972	A A	G A	G G	A A	G A	A A	A A	A A	G A	A A	A A	A A	A A	A A	A A	A A	A A	A A	A A	G A	A A	A A	G A	A A	A A	G A	A A	A A	A A	A A	G A	A A
8	8_2983649	0	2983649	A G	A G	A A	G G	A G	A G	G G	G G	A G	G G	G G	G G	G G	G G	G G	G G	G G	A G	G G	A G	G G	A G	A G	G G	G G	A G	A G	A G	G G	G G	A A	G G
8	8_2987771	0	2987771	C C	C C	C C	C C	T C	C C	C C	T C	C C	C C	T C	C C	C C	C C	C C	C C	C C	C C	C C	C C	T C	C C	C C	C C	C C	C C	C C	C C	C C	C C	C C	C C
8	8_3022040	0	3022040	A G	A G	A A	G G	A A	A G	G G	A G	A G	G G	A G	G G	G G	G G	G G	G G	G G	A G	G G	A G	A G	A A	A G	G G	G G	A G	G G	A G	G G	G G	A A	G G
8	8_3031872	0	3031872	T C	T C	T T	C C	T T	T C	C C	T C	T C	C C	T C	C C	C C	C C	C C	C C	C C	T C	C C	T C	T C	T T	T C	C C	C C	T C	C C	T C	C C	C C	T T	C C
8	8_3069865	0	3069865	A A	A A	A A	A A	A A	A A	G A	A A	A A	A A	A A	A A	A A	A A	A A	A A	A A	A A	G A	A A	A A	A A	A A	A A	A A	A A	G A	A A	A A	G A	A A	A A
8	8_3149703	0	3149703	C C	0 0	0 0	C C	C C	T C	C C	C C	C C	C C	C C	C C	C C	C C	C C	C C	C C	C C	C C	C C	T C	C C	T C	C C	C C	C C	C C	C C	C C	C C	C C	T C
8	8_3189013	0	3189013	T C	T C	T T	T C	T C	T C	C C	C C	T T	C C	C C	T T	C C	T C	T C	T C	T C	T C	C C	T C	C C	T T	T C	C C	T C	T T	C C	T C	C C	C C	T T	C C
8	8_3205594	0	3205594	C C	C C	C C	C C	T C	C C	C C	T C	C C	C C	T C	C C	C C	C C	C C	C C	C C	C C	C C	C C	T C	C C	C C	C C	C C	C C	C C	C C	C C	C C	C C	C C
8	8_3215875	0	3215875	G G	G G	G G	G A	G A	G A	G A	A A	G G	A A	A A	G G	A A	G A	G A	G A	G A	G A	G A	G A	A A	G G	G A	A A	G A	G G	G A	G A	A A	G A	G G	A A
8	8_3216080	0	3216080	T T	T T	T T	T C	T C	T C	T C	C C	T T	C C	C C	T T	C C	T C	T C	T C	T C	T C	T C	T C	C C	T T	T C	C C	T C	T T	T C	T C	C C	T C	T T	C C
8	8_3261452	0	3261452	G G	G G	G G	T G	G G	G G	T G	T G	G G	T G	T G	G G	T T	T G	T G	T G	T G	T G	T G	T G	G G	G G	G G	T T	T G	G G	T G	T G	T T	T G	G G	T G
8	8_3261533	0	3261533	C C	C C	C C	C C	T C	C C	C C	T C	C C	C C	T C	C C	C C	C C	C C	C C	C C	C C	C C	C C	T C	C C	C C	C C	C C	C C	C C	C C	C C	C C	C C	C C
8	8_3361049	0	3361049	G A	A A	A A	G A	A A	A A	G A	A A	A A	G A	A A	G A	A A	G A	G A	G A	G A	G G	A A	A A	A A	G A	A A	G A	A A	A A	A A	G A	A A	A A	A A	A A
8	8_3542473	0	3542473	T T	C T	C T	T T	C T	T T	C T	C T	C T	C T	C T	T T	C T	T T	C T	T T	T T	T T	C T	T T	C T	C T	C T	T T	T T	T T	C T	T T	T T	T T	C T	C T
8	8_3565276	0	3565276	G G	G G	A G	A G	G G	G G	A A	A A	G G	A G	A G	G G	A A	A G	A G	A G	A G	A G	A A	A G	G G	G G	G G	A A	A G	G G	A G	A G	A A	A A	G G	A G
8	8_3608369	0	3608369	A G	G G	G G	A G	G G	A G	A G	A A	G G	G G	A G	G G	A G	A G	G G	A G	G G	A G	A A	A G	A G	A G	G G	A G	A G	G G	A G	A A	A A	A A	A G	A G
8	8_3637363	0	3637363	T T	T T	G T	T T	T T	T T	G T	T T	T T	G T	T T	T T	G T	T T	G T	T T	G T	G T	T T	T T	T T	T T	T T	G T	T T	T T	T T	T T	T T	T T	T T	T T
8	8_3726860	0	3726860	C C	C C	T C	T C	C C	T C	T C	T C	T C	T C	T C	T C	T C	T C	T C	T C	T C	T C	T C	T C	T C	C C	C C	T C	T C	T C	T C	T C	T C	T C	T C	T C
8	8_3818569	0	3818569	C T	C T	C T	T T	T T	T T	T T	T T	C T	T T	T T	T T	T T	T T	T T	T T	T T	T T	T T	C T	T T	T T	C T	T T	T T	C T	T T	T T	T T	T T	T T	T T
8	8_3882741	0	3882741	C C	A C	A C	C C	A C	C C	A C	A C	A C	A C	A C	C C	A C	C C	A C	C C	C C	C C	A C	C C	A C	A C	A C	C C	C C	C C	A C	C C	C C	C C	A C	A C
8	8_3934227	0	3934227	G A	G A	G A	A A	A A	G A	A A	A A	G A	A A	A A	A A	A A	A A	A A	A A	A A	A A	A A	G A	A A	A A	G A	A A	A A	G A	A A	A A	A A	A A	G A	A A
8	8_4034487	0	4034487	G G	G G	G G	G G	G G	A G	G G	G G	G G	A G	G G	G G	G G	G G	G G	G G	G G	G G	G G	G G	G G	G G	G G	G G	G G	G G	G G	G G	G G	G G	A G	G G
8	8_4111397	0	4111397	A C	A A	C C	A C	A C	A C	C C	A C	A A	A C	C C	A A	A C	A C	A C	A C	A C	C C	C C	A C	C C	A C	A C	C C	A A	A A	C C	C C	A C	C C	A C	A C
8	8_4180191	0	4180191	G G	A G	A G	A G	A A	A G	A A	G G	G G	A G	A G	A G	G G	A G	A G	A G	A G	A G	0 0	G G	A A	A G	A A	A G	G G	G G	G G	G G	G G	A G	A G	A G
8	8_4223132	0	4223132	T T	C T	T T	T T	C T	C T	T T	T T	T T	T T	T T	T T	T T	T T	T T	T T	T T	T T	T T	T T	T T	T T	C T	T T	T T	T T	T T	T T	T T	T T	C T	C T
8	8_4391896	0	4391896	G G	G G	T G	T G	G G	G G	G G	G G	G G	T G	G G	T G	G G	T G	G G	T G	G G	G G	G G	G G	G G	T G	T G	G G	G G	G G	T G	G G	G G	G G	G G	G G
8	8_4393386	0	4393386	G G	G G	G G	A G	G G	G G	G G	G G	G G	A G	G G	A G	G G	A G	G G	A G	G G	G G	G G	G G	G G	G G	G G	G G	G G	G G	G G	G G	G G	G G	G G	G G
8	8_4406955	0	4406955	A A	A A	G A	A A	A A	A A	G A	A A	A A	A A	A A	A A	A A	A A	A A	A A	A A	A A	G A	A A	A A	A A	G A	A A	A A	A A	A A	A A	A A	G A	A A	A A
8	8_4430473	0	4430473	A A	A A	A A	G A	A A	A A	A A	A A	A A	0 0	A A	G A	A A	G A	A A	G A	A A	A A	A A	A A	A A	A A	A A	A A	A A	A A	A A	A A	A A	A A	A A	A A
8	8_4537919	0	4537919	T T	T T	T T	T T	T T	T T	T T	T T	T T	T T	T T	T T	T T	T T	T T	T T	T T	T T	T T	C C	T T	C T	T T	T T	T T	T T	T T	T T	T T	T T	T T	T T
8	8_4559972	0	4559972	G G	G G	G G	T G	G G	G G	G G	G G	G G	T G	G G	T G	T G	T G	G G	T G	G G	G G	G G	G G	G G	T G	G G	G G	G G	G G	G G	G G	G G	G G	G G	G G
8	8_4579477	0	4579477	G G	G G	G G	G G	G G	G G	G G	A G	G G	G G	G G	A G	G G	G G	G G	G G	A G	G G	G G	G G	G G	G G	G G	G G	A A	G G	A G	G G	A G	G G	G G	G G
8	8_4618457	0	4618457	A A	A A	A A	G A	A A	A A	G A	G A	A A	A A	A A	G G	A A	G A	A A	G A	G A	A A	G A	A A	A A	A A	A A	A A	G G	A A	A A	A A	G A	G A	A A	A A
8	8_4646812	0	4646812	A A	A A	A A	G A	A A	A A	A A	G A	A A	A A	G A	A A	G A	G A	A A	G A	A A	A A	G A	0 0	A A	A A	A A	G A	A A	A A	G G	G A	G A	G A	A A	G A
8	8_4665129	0	4665129	T T	T T	C T	C T	C T	C T	C T	T T	C T	T T	C T	C T	T T	C T	C T	C T	C T	C T	C T	C T	C T	T T	C T	C T	T T	C T	T T	T T	T T	C T	C T	T T
8	8_4696174	0	4696174	C C	C C	T C	C C	T C	C C	C C	C C	T C	C C	C C	C C	C C	C C	C C	C C	C C	C C	T C	T C	C C	C C	C C	C C	C C	T C	C C	T C	C C	T C	T C	C C
8	8_4745101	0	4745101	G A	G A	A A	A A	A A	A A	A A	A A	G A	A A	A A	A A	A A	A A	G A	A A	A A	G A	A A	A A	A A	G A	A A	A A	A A	G A	A A	G A	A A	A A	A A	A A
8	8_4881553	0	4881553	C C	C C	C C	C C	C C	T C	C C	C C	T C	C C	C C	C C	C C	C C	T C	C C	C C	C C	C C	C C	C C	C C	C C	C C	C C	T C	C C	C C	C C	C C	T C	C C
8	8_4931559	0	4931559	G G	G G	G G	G G	G G	A G	A G	G G	A G	A G	G G	A G	A G	G G	A G	G G	A G	A G	G G	G G	G G	G G	G G	A G	A G	A G	G G	G G	G G	G G	A G	G G
8	8_4993812	0	4993812	A A	A A	A A	A A	A A	A A	A A	A A	G A	G A	A A	A A	A A	A A	G A	A A	A A	A A	A A	A A	A A	A A	A A	A A	A A	G A	A A	A A	A A	A A	A A	A A
8	8_5025956	0	5025956	G A	G A	A A	G A	G A	G G	G G	G A	G A	G A	A A	G A	G A	G A	A A	G A	A A	G A	A A	G A	G A	G G	G A	A A	G A	G A	G A	G A	G A	A A	G G	G G
8	8_5030505	0	5030505	G G	G G	G G	G G	A G	G G	A G	A G	G G	A G	G G	G G	A G	G G	G G	G G	G G	G G	G G	A G	G G	A G	G G	G G	A G	G G	A G	G G	A G	G G	A G	G G
8	8_5128793	0	5128793	A A	C A	A A	A A	C A	A A	A A	A A	C A	A A	A A	A A	A A	A A	C A	A A	A A	A A	A A	C A	A A	A A	A A	A A	A A	C A	A A	A A	A A	A A	C A	C A
8	8_5149126	0	5149126	G G	A G	G G	G G	A G	G G	G G	G G	G G	G G	G G	G G	G G	G G	G G	G G	G G	G G	G G	A G	G G	G G	G G	G G	G G	G G	G G	G G	G G	G G	A G	G G
8	8_5149554	0	5149554	G G	A G	A A	A G	A G	A G	A G	G G	G G	A A	G G	A G	A G	A G	A G	A G	A G	A G	A G	A G	G G	G G	A G	A G	G G	G G	G G	A G	G G	A G	A A	G G
8	8_5205481	0	5205481	T T	C T	T T	T T	C T	T T	T T	T T	T T	T T	T T	T T	T T	T T	T T	T T	T T	T T	T T	C T	T T	T T	T T	T T	T T	T T	T T	T T	T T	T T	C T	T T
8	8_5240517	0	5240517	A A	C A	A A	A A	C A	A A	A A	A A	A A	A A	A A	A A	A A	A A	A A	A A	A A	A A	A A	C A	A A	A A	A A	A A	A A	A A	A A	A A	A A	A A	C A	A A
8	8_5240765	0	5240765	T C	T C	C C	T C	C C	C C	T C	T C	T C	T C	T C	T C	T C	T C	T C	T C	T C	C C	T C	T C	T C	C C	C C	C C	T C	T C	T T	T C	T C	T T	C C	C C
8	8_5259451	0	5259451	A G	A G	G G	G G	G G	G G	G G	G G	G G	G G	G G	G G	G G	G G	G G	G G	G G	G G	G G	G G	G G	G G	G G	G G	G G	G G	A G	G G	G G	G G	G G	G G
8	8_5262380	0	5262380	C C	T C	C C	T C	T C	C C	C C	C C	T C	C C	C C	T C	C C	T C	T C	T C	C C	C C	C C	T C	C C	C C	C C	C C	C C	T C	C C	C C	C C	C C	T C	C C
8	8_5279008	0	5279008	G A	G A	A A	G A	A A	A A	A A	A A	A A	A A	A A	G A	A A	G A	A A	G A	A A	A A	A A	A A	A A	A A	A A	A A	A A	A A	G A	A A	A A	A A	A A	A A
8	8_5319499	0	5319499	A A	A A	A A	G A	A A	A A	A A	G A	A A	A A	G A	G A	G A	G A	A A	G A	G A	A A	A A	G A	A A	A A	A A	A A	G A	A A	G A	A A	G A	G A	A A	A A
8	8_5378405	0	5378405	T G	T G	G G	T G	G G	G G	G G	G G	G G	G G	G G	T G	G G	T G	G G	T G	G G	G G	G G	G G	G G	G G	G G	G G	G G	G G	T G	G G	G G	G G	G G	G G
8	8_5423896	0	5423896	T T	T T	T T	G T	T T	T T	T T	T T	T T	T T	T T	G T	T T	G T	T T	G T	T T	T T	T T	T T	T T	T T	T T	T T	T T	T T	T T	T T	T T	T T	T T	T T
8	8_5424547	0	5424547	G G	G G	G G	A G	G G	G G	G G	A G	G G	G G	A G	A G	A G	A G	G G	A G	A G	G G	G G	A G	G G	G G	G G	G G	A G	G G	A G	G G	A G	A G	G G	G G
8	8_5428001	0	5428001	G G	G G	G G	T G	G G	G G	G G	T G	G G	G G	T G	T G	T G	T G	G G	T G	T G	G G	G G	T G	G G	G G	G G	G G	T G	G G	T G	G G	T G	T G	G G	G G
8	8_5471575	0	5471575	C C	T C	T C	C C	T C	T C	C C	C C	C C	T C	C C	C C	C C	C C	C C	C C	C C	C C	C C	T C	C C	C C	C C	C C	C C	C C	C C	C C	C C	C C	T T	C C
8	8_5526492	0	5526492	T T	C T	C T	C T	C T	C T	T T	C T	T T	T T	C T	C T	C T	C T	T T	C T	C T	T T	T T	C C	T T	T T	T T	T T	C T	T T	C T	T T	C T	C T	C C	T T
8	8_5645155	0	5645155	C T	C T	T T	T T	T T	T T	T T	C T	T T	T T	T T	T T	T T	T T	T T	T T	T T	T T	T T	T T	T T	T T	T T	T T	C T	T T	C T	T T	C T	T T	T T	T T
8	8_5656688	0	5656688	T C	T C	C C	C C	C C	C C	C C	T C	C C	C C	C C	C C	C C	C C	C C	C C	C C	C C	C C	C C	C C	C C	C C	C C	T C	C C	T C	C C	T C	C C	C C	C C
8	8_5799003	0	5799003	C C	C C	A C	A C	C C	A C	A A	A C	A C	A C	A C	A C	A A	A C	A C	A C	A C	C C	C C	A C	A C	C C	A A	C C	A C	A C	C C	C C	A C	A C	C C	A C
8	8_5803070	0	5803070	T C	C C	T C	T T	C C	T T	T C	T C	C C	T T	T C	T T	T T	T T	C C	T T	T C	T C	T C	T C	C C	T T	T T	T C	T C	C C	C C	T C	T C	T C	T C	T C
8	8_5817261	0	5817261	A A	A G	A G	G G	A A	A G	G G	A G	A G	A G	A G	G G	G G	G G	A G	G G	A G	A A	G G	G G	A G	A G	G G	A G	A G	A G	A G	A G	A G	G G	A A	A G
8	8_5836962	0	5836962	T T	T T	T T	T T	T T	T T	T T	T T	C T	C T	T T	T T	T T	T T	T T	T T	T T	T T	T T	T T	T T	T T	T T	T T	T T	C T	T T	T T	T T	T T	T T	C T
8	8_5892609	0	5892609	T T	C T	T T	T T	T T	T T	T T	T T	T T	T T	T T	T T	T T	T T	T T	T T	T T	T T	T T	C T	T T	T T	T T	T T	T T	T T	T T	T T	T T	T T	T T	T T
8	8_5906904	0	5906904	T T	T C	C C	C C	T T	C C	T C	T C	T C	T C	T C	C C	C C	C C	C C	C C	C C	T C	T C	C C	T T	T T	C C	T C	T C	T C	T C	T C	T C	C C	T C	C C
8	8_5948650	0	5948650	T T	T T	C T	C C	T T	C C	T T	C T	C T	T T	C T	C C	C T	C C	C C	C C	C C	C T	C T	C T	T T	T T	C C	C T	C T	C T	C T	C T	C T	C C	C T	C T
8	8_6037410	0	6037410	G G	A G	G G	G G	G G	G G	G G	G G	G G	G G	G G	G G	G G	G G	G G	G G	G G	G G	G G	G G	G G	G G	G G	G G	G G	G G	G G	G G	G G	G G	G G	G G
8	8_6113019	0	6113019	A A	C A	A A	C A	A A	A A	A A	C A	A A	A A	A A	C A	A A	C A	A A	C A	A A	A A	A A	A A	A A	A A	A A	A A	C A	A A	A A	A A	C A	A A	A A	A A
8	8_6114303	0	6114303	C T	T T	C T	T T	C T	T T	C T	T T	T T	C C	C T	T T	C T	T T	C T	T T	C T	C T	T T	C T	C T	C T	T T	C T	T T	T T	C T	T T	T T	T T	T T	T T
8	8_6115448	0	6115448	A A	G A	A A	G A	A A	A A	G G	G A	A A	G G	A A	G A	G A	G A	A A	G A	A A	G A	A A	A A	G A	A A	A A	A A	G A	A A	G A	G A	G A	A A	A A	A A
8	8_6116452	0	6116452	A C	C C	A C	C C	C C	C C	C C	C C	C C	C C	C C	C C	C C	C C	A C	C C	A C	A C	C C	C C	C C	A C	C C	A C	C C	C C	C C	C C	C C	C C	C C	C C
8	8_6117932	0	6117932	G G	A G	G G	A G	G G	G G	G G	G G	G G	G G	G G	A G	G G	A G	G G	A G	G G	G G	G G	G G	G G	G G	G G	G G	G G	G G	G G	G G	G G	G G	G G	G G
8	8_6126833	0	6126833	A A	A A	A A	A A	G G	A A	A A	A A	A A	A A	G A	A A	A A	A A	A A	A A	A A	A A	G A	G A	G A	G A	A A	G A	A A	A A	A A	A A	A A	A A	G A	A A
8	8_6159323	0	6159323	T C	T C	C C	T C	C C	T C	T C	T C	C C	T C	C C	T C	T C	T C	C C	T C	C C	C C	C C	C C	C C	C C	C C	C C	T C	C C	T T	C C	T C	C C	T C	C C
8	8_6188009	0	6188009	C C	A C	C C	A A	A A	A A	C C	A C	A A	C C	A A	A A	A C	A A	C C	A A	A C	C C	A C	A C	A C	C C	A C	C C	A C	A C	C C	A C	A C	A A	A A	A C
8	8_6290442	0	6290442	C C	C C	T C	C C	C C	C C	C C	T C	C C	C C	C C	C C	C C	C C	T C	C C	C C	C C	C C	C C	C C	C C	T C	C C	T C	T C	C C	C C	T C	C C	C C	C C
8	8_6309220	0	6309220	T C	T C	T C	T T	C C	C C	T C	T C	T T	T C	T C	T T	T T	T T	T C	T T	T T	T C	C C	T C	C C	T C	C C	T C	T C	T C	T C	C C	T C	T C	C C	T C
8	8_6312269	0	6312269	A G	A G	A G	A A	G G	G G	A G	A G	A G	A A	A G	A A	A A	A A	G G	A A	A G	G G	G G	A G	G G	A G	G G	G G	A G	G G	A G	G G	A G	A G	G G	G G
8	8_6351759	0	6351759	A A	A A	A A	A A	A A	G A	A A	A A	A A	0 0	A A	A A	A A	A A	A A	A A	A A	A A	A A	A A	A A	A A	G A	A A	A A	A A	A A	A A	A A	A A	A A	G A
8	8_6422513	0	6422513	T T	T T	T T	C T	C C	C T	T T	C T	C T	T T	C C	C T	C T	C T	C T	C T	C C	C T	C T	C T	C T	C T	C T	C C	C T	T T	T T	T T	C T	C T	C T	C C
8	8_6422622	0	6422622	G G	G G	G G	A G	A A	A G	G G	A G	A G	G G	A A	A G	A G	A G	A G	A G	A A	A G	A G	A G	A G	A G	A G	A A	A G	G G	G G	G G	A G	A G	A G	A A
8	8_6458551	0	6458551	G G	G G	G G	A G	A A	G G	G G	A G	A G	G G	A A	A G	A G	A G	A G	A G	A A	A G	G G	A G	A G	G G	G G	A G	A G	G G	G G	G G	A G	A G	A G	A G
8	8_6516941	0	6516941	G A	G A	G G	G A	A A	A A	A A	G A	A A	A A	A A	G A	A A	A A	G A	A A	A A	A A	A A	G A	A A	G A	G A	A A	A A	G A	A A	A A	A A	A A	A A	A A
8	8_6517101	0	6517101	A A	A A	A A	A A	G G	G A	A A	A A	A A	A A	G A	A A	A A	A A	G A	A A	G A	G A	A A	A A	G A	A A	G A	G A	A A	A A	A A	A A	A A	A A	G A	G A
8	8_6520025	0	6520025	C C	C C	C C	C C	C C	A C	A C	C C	C C	A C	C C	C C	A C	C C	C C	C C	C C	C C	A C	C C	C C	C C	C C	C C	C C	C C	A C	A C	C C	A C	A C	A C
8	8_6520242	0	6520242	T T	T T	T T	T T	T T	G T	G T	T T	T T	G T	T T	T T	G T	G T	T T	G T	T T	T T	G G	T T	T T	G T	T T	G T	T T	T T	G T	G T	T T	G T	G T	G T
8	8_6545941	0	6545941	C T	C T	C C	C T	T T	C T	C T	C T	T T	C T	T T	C T	C T	C T	C T	C T	T T	T T	C C	C T	T T	C C	C T	C T	T T	C T	C T	C T	T T	C T	C T	C T
8	8_6545985	0	6545985	G G	A G	A G	A G	G G	G G	G G	G G	G G	G G	G G	A G	G G	G G	G G	G G	G G	G G	G G	A G	G G	G G	G G	G G	G G	G G	G G	G G	G G	G G	G G	G G
8	8_6593714	0	6593714	G G	G G	G G	G G	A G	A G	G G	G G	G G	G G	G G	G G	G G	G G	A G	G G	A G	A G	G G	G G	G G	G G	A G	A G	G G	G G	G G	G G	G G	G G	A G	A G
8	8_6631780	0	6631780	C C	T C	T C	C C	C C	C C	C C	C C	C C	C C	C C	C C	C C	C C	C C	C C	C C	C C	C C	C C	C C	C C	C C	C C	C C	C C	C C	C C	C C	C C	C C	C C
8	8_6671714	0	6671714	A A	A A	A A	A A	A A	A A	G A	G A	A A	G A	A A	A A	G A	A A	A A	A A	A A	A A	A A	A A	A A	A A	A A	A A	A A	A A	G A	A A	A A	A A	A A	G A
8	8_6817693	0	6817693	G G	G G	G G	G G	G G	G G	G G	G G	A G	G G	G G	G G	G G	G G	G G	G G	G G	G G	G G	G G	G G	G G	G G	G G	G G	A G	G G	G G	G G	G G	G G	G G
8	8_6893392	0	6893392	T T	T T	T T	T T	T T	T T	T T	T T	T T	T T	C T	T T	T T	C T	T T	C T	T T	T T	T T	T T	T T	T T	T T	T T	C T	T T	T T	T T	C T	T T	T T	T T
8	8_6942438	0	6942438	G A	G A	A A	A A	G A	A A	A A	A A	A A	A A	G A	A A	A A	A A	A A	A A	A A	A A	A A	A A	G A	A A	A A	A A	A A	A A	A A	A A	A A	A A	A A	A A
8	8_7119192	0	7119192	A G	A G	G G	G G	G G	G G	G G	G G	G G	G G	G G	G G	G G	G G	G G	G G	G G	G G	G G	G G	G G	G G	G G	G G	G G	G G	G G	G G	G G	G G	G G	G G
8	8_7121463	0	7121463	C C	C C	T C	T C	C C	C C	T C	T C	C C	T C	C C	T C	T C	C C	T C	C C	C C	C C	C C	C C	C C	C C	T C	C C	C C	T C	T C	C C	C C	C C	C C	T C
8	8_7128212	0	7128212	G G	G G	A G	A G	G G	G G	A G	A G	G G	A G	G G	A G	A G	G G	A G	G G	G G	G G	G G	G G	G G	G G	A G	G G	G G	A G	A G	G G	G G	G G	G G	A G
8	8_7200462	0	7200462	A A	A A	G A	G A	G A	G A	A A	G A	G A	A A	G A	G A	A A	A A	G G	A A	G A	G A	G A	G A	G A	A A	G A	G A	A A	G G	A A	G A	A A	G A	G A	G A
8	8_7207284	0	7207284	A G	A G	G G	G G	G G	G G	G G	G G	G G	G G	G G	G G	G G	G G	G G	G G	G G	G G	G G	G G	G G	G G	G G	G G	G G	G G	G G	G G	G G	G G	G G	G G
8	8_7252268	0	7252268	G A	G A	G A	G A	G A	G G	G A	A A	G A	G G	G A	G A	G A	G A	A A	G A	A A	A A	G A	A A	G A	G A	G A	A A	A A	G A	G A	G A	A A	G A	G A	G A
8	8_7282988	0	7282988	A G	A G	G G	A G	A G	G G	A G	A A	A G	G G	A G	A G	A G	A G	A G	A G	A A	A A	A G	A G	A G	A G	G G	A A	A A	G G	A G	A G	A A	A G	A G	G G
8	8_7317210	0	7317210	C C	C C	C C	C C	A C	C C	C C	A C	C C	C C	C C	C C	C C	C C	A C	C C	A C	A C	C C	C C	C C	C C	C C	A C	C C	C C	C C	C C	C C	C C	A C	C C
8	8_7399429	0	7399429	T T	T T	G T	T T	G G	G T	T T	G T	T T	T T	G T	T T	T T	T T	G T	T T	G T	G T	T T	T T	G T	T T	T T	G T	T T	T T	T T	T T	T T	T T	G G	T T
8	8_7457327	0	7457327	T T	T T	C T	T T	C T	C C	T T	C T	T T	C T	T T	T T	T T	T T	C C	T T	C T	C T	T T	C T	T T	T T	C C	C T	T T	C T	T T	T T	T T	T T	C C	C T
8	8_7468593	0	7468593	A G	A G	A G	A G	G G	G G	G G	G G	G G	G G	G G	A G	G G	A G	A G	A G	G G	G G	G G	G G	G G	G G	A G	G G	G G	A G	A G	G G	G G	G G	G G	G G
8	8_7498105	0	7498105	T T	T T	T T	T C	T C	C C	T C	C C	T C	T T	T C	T C	T C	T C	T C	T C	C C	C C	T T	C C	T C	T T	T C	T C	C C	T T	T T	T C	C C	T C	C C	T C
8	8_7514959	0	7514959	G G	G G	G G	A G	G G	G G	G G	G G	G G	G G	G G	A G	G G	G G	G G	G G	G G	G G	G G	A G	G G	G G	G G	G G	G G	G G	G G	G G	G G	G G	G G	G G
8	8_7515309	0	7515309	C C	C C	C C	T C	C C	C C	C C	C C	C C	C C	C C	T C	C C	C C	C C	C C	C C	C C	C C	T C	C C	C C	C C	C C	C C	C C	C C	C C	C C	C C	C C	C C
8	8_7555332	0	7555332	C C	C C	C C	T C	C C	C C	C C	C C	C C	C C	C C	T C	C C	C C	C C	C C	C C	C C	C C	T C	C C	C C	C C	C C	C C	C C	C C	C C	C C	C C	C C	C C
8	8_7606462	0	7606462	C T	C T	C C	T T	C T	T T	T T	T T	T T	T T	C T	T T	T T	C T	C T	C T	T T	T T	T T	T T	C T	C T	C T	T T	T T	C T	T T	T T	T T	T T	T T	T T
8	8_7654399	0	7654399	A A	A A	G A	A A	A A	A A	A A	A A	A A	A A	A A	A A	A A	G A	G A	G A	A A	A A	A A	A A	A A	G A	G A	A A	A A	G A	A A	A A	A A	A A	A A	A A
8	8_7779200	0	7779200	G G	G G	G G	G G	G G	A G	A G	G G	A G	G G	G G	G G	G G	G G	G G	G G	G G	A G	A G	A G	A G	G G	G G	G G	A G	A G	G G	A A	A G	A G	A G	G G
8	8_7831372	0	7831372	C T	C T	C T	T T	C T	C T	C T	C T	T T	T T	C T	T T	T T	T T	C T	T T	C T	C C	T T	C T	C C	C T	T T	C T	C T	T T	T T	C T	C T	T T	C T	T T
8	8_7850509	0	7850509	T C	T C	T C	C C	T C	T C	T C	T C	C C	C C	T C	C C	C C	C C	T C	C C	T C	T T	T C	T C	T T	T T	C C	T T	T C	C C	C C	T C	T C	C C	T C	T C
8	8_7879198	0	7879198	G G	G G	A G	G G	A G	G G	G G	G G	G G	A G	G G	G G	G G	A G	A G	A G	G G	G G	A G	G G	G G	A G	A G	A G	G G	A G	G G	G G	G G	G G	A G	A G
8	8_7915978	0	7915978	T T	T T	G T	T T	T T	G T	T T	T T	G T	T T	T T	T T	T T	G T	G T	G T	T T	T T	G G	T T	T T	G T	G G	G T	T T	G G	T T	G T	T T	G T	T T	G G
8	8_7936245	0	7936245	A A	A A	C A	A A	A A	A A	A A	A A	A A	A A	A A	A A	A A	C A	C A	C A	A A	A A	C A	A A	A A	C A	C A	C A	A A	C A	A A	A A	A A	A A	A A	C A
8	8_8075610	0	8075610	C T	C T	C T	C T	C T	C T	C T	T T	C T	C C	T T	C T	C T	C T	C T	C T	T T	T T	C C	T T	T T	C T	C C	C T	T T	C C	C C	C T	T T	C T	C T	C C
8	8_8138408	0	8138408	A A	A A	A A	A A	A A	A A	G A	A A	A A	G A	A A	A A	G A	A A	A A	A A	A A	A A	A A	A A	A A	A A	A A	A A	A A	A A	G A	A A	A A	A A	A A	A A
8	8_8156272	0	8156272	T T	T T	T T	T T	T T	C T	T T	T T	C T	T T	T T	T T	T T	T T	T T	T T	T T	T T	C T	T T	T T	T T	C T	T T	T T	C T	T T	C T	T T	C T	T T	C T
8	8_8268409	0	8268409	C C	C C	C C	C C	C C	C C	C C	C C	C C	C C	C C	C C	C C	C C	C C	C C	C C	C C	T C	C C	C C	T C	C C	T C	C C	C C	C C	C C	C C	C C	C C	C C
8	8_8402324	0	8402324	T T	T T	C T	C T	C T	T T	T T	T T	T T	C T	T T	C T	T T	C T	C T	C T	T T	T T	C T	T T	T T	C T	C T	C T	T T	C T	T T	T T	T T	T T	C T	T T
8	8_8470201	0	8470201	G A	G A	G A	G A	G G	A A	G A	G A	G A	G A	G A	G A	G A	A A	G A	A A	G A	G A	G A	A A	G A	A A	A A	G A	A A	G A	G A	G A	A A	G A	G A	A A
8	8_8496642	0	8496642	G T	G T	T T	G T	T T	G G	G T	G T	G T	T T	G T	G T	G T	G T	T T	G T	G T	G T	T T	G G	G T	T T	G T	T T	G G	T T	G T	G T	G G	G T	G T	G T
8	8_8498964	0	8498964	C A	C A	A A	C A	A A	C C	C A	C A	C A	A A	C A	C A	C A	C A	A A	C A	C A	C A	A A	C C	C A	A A	C A	A A	C C	A A	C A	C A	C C	C A	C A	C A
8	8_8544952	0	8544952	T G	T G	G G	T G	G G	T T	T G	T G	T G	G G	T G	T G	T G	T G	G G	T G	T G	T G	G G	T T	T G	G G	T G	G G	T T	G G	T G	T G	T T	T G	T G	T G
8	8_8563727	0	8563727	C T	C T	C C	C T	C C	T T	C T	C T	C T	C T	C T	C T	C T	C T	C C	C T	C T	C T	C T	T T	C T	T T	C T	C T	T T	C C	C T	C T	T T	C T	C T	T T
8	8_8637492	0	8637492	A C	A C	A C	A C	A A	C C	A C	A C	A C	A A	A C	A C	A C	C C	A C	C C	A C	A C	A A	C C	A C	A C	C C	A A	C C	A C	A C	A C	C C	A C	A C	C C
8	8_8752893	0	8752893	G G	G G	G G	G G	G G	G G	G G	G G	G G	G G	G G	G G	G G	G G	G G	G G	G G	G G	G G	G G	G G	A G	G G	G G	G G	G G	G G	G G	G G	G G	G G	A G
8	8_8758004	0	8758004	T C	T C	T C	C C	T C	C C	C C	C C	C C	C C	T C	C C	C C	C C	C C	C C	C C	C C	C C	C C	T C	C C	C C	C C	C C	C C	C C	C C	C C	C C	C C	C C
8	8_8819779	0	8819779	A A	A A	A A	G A	A A	A A	A A	A A	G A	A A	A A	G A	A A	A A	A A	A A	A A	A A	G A	A A	A A	G A	A A	A A	A A	G A	A A	G A	A A	G A	A A	G A
8	8_8862384	0	8862384	T C	T C	T C	T C	T C	T C	C C	C C	C C	C C	T C	T C	C C	C C	C C	C C	C C	C C	C C	C C	T C	C C	T C	C C	C C	C C	T C	C C	C C	C C	C C	T C
8	8_8883290	0	8883290	G G	G G	A G	G G	G G	G G	G G	G G	G G	G G	G G	G G	G G	A G	A G	A G	G G	G G	G G	G G	G G	G G	A G	G G	G G	A G	G G	G G	G G	G G	G G	G G
8	8_8916956	0	8916956	0 0	0 0	0 0	T C	T C	T C	T C	C C	C C	T C	T C	T C	T C	T C	T C	T C	C C	C C	C C	T C	T C	T C	T T	C C	C C	T C	T T	C C	C C	C C	C C	T C
8	8_8969864	0	8969864	T T	T C	C C	C C	T C	T C	C C	C C	C C	T C	T C	C C	C C	C C	C C	C C	T C	C C	C C	C C	T C	C C	T C	T C	C C	C C	C C	C C	C C	C C	C C	T C
8	8_8976980	0	8976980	G G	A G	G G	G G	A G	G G	A A	A G	G G	A G	G G	G G	A G	G G	A G	G G	G G	A A	A G	A G	A G	A A	G G	A G	A G	G G	A A	A G	A G	G G	A G	G G
8	8_9023079	0	9023079	A G	G G	G G	G G	A G	A A	A G	A G	G G	A G	G G	G G	A G	G G	A G	G G	G G	A A	A G	G G	A G	G G	A G	G G	A G	G G	G G	A A	A G	A G	A A	A G
8	8_9067048	0	9067048	C C	C T	C C	C T	C T	C C	C T	C T	T T	C C	T T	C T	C C	C T	C T	C T	T T	C T	C C	C T	T T	C C	C C	C T	T T	T T	C T	C T	T T	C T	C C	C T
8	8_9155934	0	9155934	G G	G G	G G	A G	G G	G G	G G	G G	G G	G G	G G	A G	G G	G G	G G	G G	G G	G G	A G	G G	G G	A G	G G	A G	G G	G G	G G	G G	G G	G G	G G	G G
8	8_9186481	0	9186481	G G	G G	G G	T T	T G	G G	G G	T T	T T	G G	T G	T T	G G	T G	T T	T G	T G	T G	T T	T G	T G	T G	G G	T G	T G	T T	G G	T G	T G	T T	G G	G G
8	8_9194496	0	9194496	G G	G G	A A	A G	A G	A G	G G	A G	G G	A G	A G	A G	G G	G G	A G	G G	A G	A G	A A	G G	G G	A G	A A	A A	G G	G G	G G	A G	G G	A G	A G	A G
8	8_9213062	0	9213062	G A	G G	G A	A A	G A	A A	G A	A A	A A	G G	G A	A A	G A	G A	A A	G A	G A	A A	A A	A A	A A	G A	A A	G A	A A	A A	G A	A A	A A	A A	G A	A A
8	8_9237581	0	9237581	T G	T T	G G	G G	G G	G G	G G	G G	G G	G G	G G	G G	G G	G G	G G	G G	G G	G G	G G	G G	G G	G G	G G	G G	G G	G G	T G	G G	G G	G G	G G	G G
8	8_9304992	0	9304992	A G	G G	G G	G G	G G	G G	G G	G G	G G	G G	G G	G G	G G	G G	G G	G G	G G	G G	G G	G G	G G	G G	G G	G G	G G	G G	A G	G G	G G	G G	G G	G G
8	8_9325552	0	9325552	T C	C C	C C	C C	C C	C C	C C	C C	C C	C C	C C	C C	C C	C C	C C	C C	C C	C C	C C	C C	C C	C C	C C	C C	C C	C C	T C	C C	C C	C C	C C	C C
8	8_9374074	0	9374074	T T	G G	G G	G G	G G	T G	T G	G G	G G	T G	T G	G G	T G	T G	G G	T G	G G	T G	T G	T G	T G	G G	G G	G G	T G	G G	T G	T T	T G	T T	T G	G G
8	8_9379759	0	9379759	G A	A A	A A	A A	A A	A A	A A	A A	A A	G A	G A	A A	A A	A A	A A	A A	A A	A A	G A	G A	A A	A A	A A	A A	A A	A A	A A	A A	A A	G G	A A	A A
8	8_9430846	0	9430846	A G	A G	A A	G G	G G	A G	G G	G G	G G	G G	A G	G G	G G	G G	G G	G G	G G	G G	A A	A G	G G	A G	A A	A G	G G	G G	G G	A G	G G	A A	G G	A A
8	8_9436859	0	9436859	A G	G G	A A	G G	G G	A G	G G	G G	G G	G G	G G	G G	G G	G G	G G	G G	G G	G G	G G	A G	G G	G G	A A	G G	G G	G G	G G	G G	G G	G G	G G	A G
8	8_9466731	0	9466731	A A	G A	A A	A A	A A	A A	A A	G A	A A	A A	G A	A A	A A	A A	G A	A A	A A	G A	G A	A A	A A	A A	A A	A A	A A	A A	A A	A A	A A	G G	A A	G A
8	8_9548832	0	9548832	G G	G G	A G	A G	G G	G G	G G	G G	G G	G G	G G	A G	A G	A G	G G	A G	G G	G G	A G	G G	G G	A A	G G	A G	G G	G G	G G	G G	G G	G G	G G	G G
8	8_9597547	0	9597547	A G	A A	G G	A G	A G	G G	A G	A G	A A	A G	A A	A G	A A	A G	A G	A G	A A	G G	G G	A G	A G	A G	G G	A G	A G	A A	G G	A G	A G	A G	G G	A G
8	8_9606317	0	9606317	C C	C C	T C	C C	C C	T C	C C	C C	C C	T C	C C	C C	C C	C C	C C	C C	C C	C C	T C	T C	C C	T C	T C	T C	C C	C C	C C	C C	C C	C C	C C	T C
8	8_9609355	0	9609355	C C	C C	C C	C C	C C	C C	T C	C C	C C	T C	C C	C C	T C	C C	C C	C C	C C	C C	C C	C C	C C	C C	C C	C C	C C	C C	C C	C C	C C	C C	C C	C C
8	8_9657903	0	9657903	A A	A A	G A	A A	A A	G A	G A	A A	A A	G G	A A	A A	G A	G A	A A	G A	A A	A A	G A	G A	A A	G A	G A	G A	A A	A A	A A	A A	A A	A A	A A	G A
8	8_9736050	0	9736050	T C	T C	T T	C C	T C	T C	T C	C C	C C	C C	C C	C C	C C	C C	C C	C C	C C	T C	T C	T C	T C	T T	T C	T C	T C	C C	T C	T C	T C	C C	T T	C C
8	8_9738714	0	9738714	G A	A A	A A	A A	G A	G A	G A	A A	A A	A A	A A	A A	A A	A A	A A	A A	A A	G A	G A	G A	G A	G A	A A	G A	G A	A A	G A	G A	G A	A A	G G	A A
8	8_9759042	0	9759042	C C	C C	C C	C C	C C	C C	T C	C C	C C	C C	C C	C C	C C	C C	C C	C C	C C	C C	C C	C C	T C	C C	C C	C C	T C	C C	C C	C C	T C	C C	C C	C C
8	8_9870854	0	9870854	T T	T T	T T	T T	T T	T T	C T	T T	T T	T T	T T	T T	T T	T T	T T	T T	T T	T T	T T	T T	C T	T T	T T	T T	C T	T T	T T	T T	C T	T T	T T	T T
8	8_9894359	0	9894359	C C	C C	C C	C C	C C	C C	C C	C C	C C	C C	C C	C C	C C	C C	C C	C C	C C	C C	T C	C C	C C	C C	C C	C C	C C	C C	C C	C C	C C	T C	C C	T C
8	8_9910682	0	9910682	C C	C C	C C	C C	C C	C C	C C	C C	C C	C C	C C	C C	C C	C C	C C	C C	C C	C C	T C	C C	C C	C C	C C	C C	C C	C C	C C	C C	C C	T C	C C	C C
8	8_9913455	0	9913455	C C	C C	C C	T C	T C	C C	T T	T C	T T	T C	T C	T C	T C	T C	T C	T C	T T	C C	C C	T C	T T	C C	C C	T C	T T	T T	C C	C C	T T	C C	C C	C C
8	8_9997716	0	9997716	T C	T C	C C	T C	T C	T T	T C	T C	C C	T C	T C	T C	T T	T C	T C	C C	T T	T C	C C	T C	T C	C C	T C	T C	T C	T C	T C	T T	T C	C C	T C	T C
8	8_10044262	0	10044262	A G	A G	A A	A G	G G	G G	G G	A G	A A	G G	G G	A G	G G	G G	A G	A G	G G	A G	A G	G G	G G	A G	A G	A G	G G	A G	G G	G G	G G	G G	G G	G G
8	8_10093911	0	10093911	C C	C C	T T	T T	T T	C T	T T	C T	C C	T T	T T	T T	T T	T T	C T	C T	T T	C C	C T	T T	T T	C T	C T	C T	T T	C T	T T	C T	T T	T T	T T	C T
8	8_10114168	0	10114168	T T	C T	T T	T T	C T	C C	C T	T T	T T	C T	C C	T T	C C	C T	T T	C T	C T	T T	C T	C T	T T	C T	C T	C C	T T	T T	C C	C T	T T	C T	C C	C C
8	8_10149470	0	10149470	G G	T G	G G	G G	G G	G G	G G	T T	T G	T G	G G	T G	G G	G G	T T	G G	T G	T G	T G	G G	G G	G G	G G	G G	T G	T G	T G	G G	G G	T G	G G	G G
8	8_10181798	0	10181798	A G	A A	G G	A A	G G	A G	G G	A A	A G	A G	G G	A A	G G	A A	A A	A G	A G	A A	A A	G G	G G	A G	A G	A G	A G	A G	A G	A G	G G	A G	G G	A A
8	8_10213477	0	10213477	G G	A G	G G	A G	A G	A G	G G	A A	A A	A G	A G	A A	G G	G G	A A	A G	A G	A G	A G	A G	G G	G G	A G	G G	A G	A A	A G	G G	G G	A A	A G	A G
8	8_10225109	0	10225109	T T	T T	C T	C T	C T	T T	T T	T T	T T	T T	C T	C T	T T	T T	T T	T T	T T	T T	T T	C T	C T	C T	T T	T T	T T	T T	T T	T T	C T	C T	T T	T T
8	8_10248408	0	10248408	A A	A A	A A	A A	A A	G A	G A	G A	G G	A A	G A	A A	A A	A A	G A	G A	A A	G A	G A	A A	G A	A A	G A	G A	G A	G A	A A	A A	G A	G A	A A	G A
8	8_10266286	0	10266286	C T	C C	C C	C T	C T	T T	T T	C T	C C	T T	T T	T T	T T	C C	C T	C C	T T	C C	C T	T T	T T	T T	C T	C T	T T	C T	T T	C T	T T	T T	C T	C T
8	8_10282299	0	10282299	T T	T T	T T	T T	C T	T T	T T	T T	C T	T T	T T	T T	T T	T T	T T	C T	T T	T T	T T	T T	T T	T T	T T	T T	T T	C T	T T	T T	T T	T T	C T	C T
8	8_10311520	0	10311520	A G	G G	G G	A G	G G	A G	A G	G G	G G	A G	A A	A G	A G	G G	G G	G G	A G	G G	G G	G G	G G	G G	A G	A G	G G	G G	A G	G G	G G	A G	G G	A G
8	8_10352166	0	10352166	C C	C C	C C	C C	T C	C C	C C	T T	T C	T C	C C	T C	C C	C C	T T	C C	T C	T C	C C	T C	T C	C C	C C	C C	T C	T C	C C	C C	T C	C C	C C	C C
8	8_10352209	0	10352209	G G	G G	G G	G G	A G	G G	G G	A A	A G	A G	G G	A G	G G	G G	A A	G G	A G	A G	G G	A G	A G	G G	G G	G G	A G	A G	G G	G G	A G	G G	G G	G G
8	8_10372575	0	10372575	C C	C C	C C	T C	C C	T C	T C	T C	C C	T T	T T	T T	T C	C C	T C	C C	T T	C C	C C	C C	C C	C C	T C	T C	T C	T C	T C	C C	C C	T C	C C	T C
8	8_10379251	0	10379251	T C	T C	C C	C C	T T	C C	C C	C C	C C	C C	C C	C C	C C	C C	C C	C C	C C	C C	C C	T C	T C	C C	C C	C C	C C	C C	C C	C C	T C	C C	T C	C C
8	8_10444459	0	10444459	A A	A A	G A	A A	A A	A A	A A	G A	G A	A A	A A	A A	A A	A A	G A	G A	A A	G A	A A	A A	A A	A A	G A	A A	A A	A A	A A	A A	A A	A A	A A	G A
8	8_10498403	0	10498403	G G	G G	A G	G G	A A	G G	A G	G G	G G	G G	G G	G G	G G	G G	G G	G G	G G	G G	G G	A G	A A	G G	A G	G G	A G	G G	G G	G G	A A	G G	A G	G G
8	8_10529001	0	10529001	C C	C C	C C	C C	C C	C C	C C	C C	T C	C C	C C	C C	C C	C C	C C	C C	C C	C C	C C	C C	C C	C C	C C	C C	C C	T C	C C	C C	C C	C C	C C	C C
8	8_10602506	0	10602506	A A	A A	A A	G A	A A	G A	A A	A A	A A	A A	A A	G A	A A	G A	A A	G A	A A	A A	G A	A A	A A	A A	G A	A A	A A	A A	G A	A A	A A	G A	A A	G A
8	8_10611654	0	10611654	C C	C C	C C	C C	C C	T C	C C	T T	T T	T C	T C	T C	T C	C C	T T	C C	T C	T C	C C	C C	C C	C C	C C	C C	T C	T T	C C	T C	C C	T C	T C	C C
8	8_10684120	0	10684120	T T	T T	T C	C C	C C	T C	C C	T C	T C	T C	C C	T C	T C	C C	T C	C C	T C	T C	T C	T C	C C	T C	T C	C C	T C	T T	T C	T T	C C	T C	T C	C C
8	8_10740392	0	10740392	C T	T T	T T	C T	C T	C T	C T	C T	T T	C T	C C	C T	C T	C T	C T	T T	C C	T T	C T	T T	C C	C T	T T	C C	C C	C T	T T	C T	C C	C T	C T	T T
8	8_10756375	0	10756375	A A	G A	A A	A A	A A	A A	A A	A A	A A	A A	A A	A A	A A	A A	A A	A A	A A	A A	A A	G A	A A	A A	A A	A A	A A	A A	A A	A A	A A	A A	A A	A A
8	8_10804722	0	10804722	G G	G G	G G	G G	G G	G G	G G	G G	G G	G G	G G	G G	G G	G G	G G	G G	G G	G G	G G	G G	G G	G G	G G	G G	G G	G G	G G	G G	G G	G G	G G	G G
8	8_10906674	0	10906674	C C	T C	T C	T C	T C	T C	C C	C C	T C	C C	T C	T C	C C	C C	C C	C C	C C	C C	T C	T T	T C	C C	T C	C C	C C	T C	T C	C C	T C	T T	C C	T C
8	8_10967939	0	10967939	G T	T T	T T	G T	T T	G G	T T	T T	T T	T T	T T	G T	G T	T T	T T	T T	T T	T T	G G	G G	T T	T T	G T	G T	T T	T T	G G	G T	T T	G T	G T	G T
8	8_10978521	0	10978521	T C	T C	C C	T C	C C	C C	C C	C C	C C	C C	T C	C C	C C	T T	C C	T C	T C	T C	C C	C C	C C	T C	C C	T C	C C	C C	C C	T C	C C	C C	C C	C C
8	8_10990477	0	10990477	C T	T T	C T	C T	T T	C C	C T	T T	T T	T T	T T	C T	C T	T T	T T	T T	T T	T T	C C	C T	C T	T T	C C	C T	C T	T T	C C	C T	C T	C T	C T	C T
8	8_11014804	0	11014804	G G	A G	G G	A G	G G	G G	A G	G G	G G	A G	A G	G G	A G	A A	G G	A G	A G	G G	G G	G G	G G	A A	G G	A G	G G	G G	G G	G G	G G	G G	G G	G G
8	8_11063880	0	11063880	G G	G G	G G	A G	G G	G G	G G	G G	G G	G G	A G	G G	G G	A A	G G	A G	A G	G G	G G	G G	G G	A G	G G	A G	G G	G G	A G	G G	G G	G G	G G	G G
8	8_11068272	0	11068272	G G	G G	G G	G G	G G	G G	G G	G G	G G	G G	G G	G G	G G	G G	G G	G G	G G	G G	G G	G G	G G	T G	G G	G G	G G	G G	G G	G G	G G	G G	G G	G G
8	8_11313256	0	11313256	G G	G G	G G	G G	G G	G G	G G	G G	G G	G G	G G	G G	G G	G G	G G	G G	G G	G G	G G	A G	G G	G G	G G	G G	G G	G G	G G	G G	G G	G G	G G	G G
8	8_11353991	0	11353991	A A	A A	A A	A A	A A	A A	A A	A A	A A	A A	A A	A A	A A	A A	A A	A A	A A	A A	A A	C A	A A	C A	A A	A A	A A	A A	A A	A A	A A	A A	A A	A A
8	8_11380424	0	11380424	A A	A A	A A	A A	G A	A A	A A	A A	A A	A A	A A	A A	A A	A A	A A	G A	A A	A A	G A	A A	A A	G A	A A	G A	A A	A A	A A	A A	A A	A A	G A	G A
8	8_11460500	0	11460500	T T	T T	G T	G T	T T	T T	T T	T T	T T	T T	G T	T T	T T	G T	T T	T T	G T	T T	T T	T T	T T	T T	G T	G T	T T	T T	T T	T T	T T	T T	T T	T T
8	8_11478092	0	11478092	C C	C T	C C	C T	T T	C T	C T	T T	T T	T T	C T	T T	T T	C C	T T	C T	C T	C T	C T	C T	C T	T T	C T	C T	C T	T T	C T	C C	C T	C T	C T	T T
8	8_11556610	0	11556610	C T	C C	C T	C T	T T	T T	C T	T T	T T	T T	C T	T T	T T	C T	T T	C T	C T	C T	C T	C C	C T	C T	C T	C C	C T	T T	C T	C T	C T	T T	T T	C T
8	8_11582493	0	11582493	A A	A G	A G	G G	G G	A G	G G	G G	G G	G G	G G	G G	G G	A G	G G	A G	G G	A G	A G	G G	G G	G G	G G	G G	G G	G G	A A	A A	G G	A G	A G	G G
8	8_11582667	0	11582667	C C	C C	C T	T T	C C	C T	C T	T T	C T	C T	C T	T T	C T	C T	T T	C T	T T	C T	C T	C T	C T	T T	T T	T T	T T	C T	C C	C C	C T	C C	C C	T T
8	8_11590300	0	11590300	T T	T T	G T	G T	G G	T T	G T	T T	G T	T T	G G	T T	T T	G T	T T	T T	G T	T T	T T	T T	G G	T T	G T	G T	G T	G T	T T	T T	G G	G T	G T	T T
8	8_11615628	0	11615628	A G	A A	G G	A G	G G	A G	G G	A A	A G	A G	G G	A A	A G	G G	A A	A G	A G	A A	A G	A A	G G	A G	A G	A G	A G	A G	A G	A G	G G	G G	G G	A A
8	8_11666877	0	11666877	C C	C C	C C	C C	C C	C C	T C	C C	C C	T C	C C	C C	T C	C C	C C	C C	C C	C C	C C	C C	C C	C C	C C	C C	C C	C C	C C	C C	C C	C C	C C	C C
8	8_11709593	0	11709593	A A	A A	A A	A A	G G	A A	A A	A A	G A	A A	G A	A A	A A	A A	A A	A A	A A	A A	A A	G A	G A	A A	A A	A A	A A	G A	A A	A A	G A	G A	G A	A A
8	8_11747368	0	11747368	G G	G G	G G	G G	G G	G G	G G	G G	G G	G G	G G	G G	G G	G G	G G	G G	G G	G G	G G	A G	G G	G G	G G	G G	G G	G G	G G	G G	G G	G G	G G	G G
8	8_11821116	0	11821116	C C	C C	C C	C C	C C	C C	C C	C C	C C	C C	C C	C C	C C	C C	C C	T C	C C	C C	C C	C C	C C	C C	C C	C C	C C	C C	C C	C C	C C	C C	C C	T C
8	8_11824226	0	11824226	A A	A A	A A	A A	G A	A A	A A	A A	A A	A A	A A	A A	A A	A A	A A	G A	A A	A A	A A	A A	A A	A A	A A	A A	A A	A A	A A	A A	A A	A A	G A	G A
8	8_11826176	0	11826176	C C	T C	C C	C C	C C	C C	T C	C C	C C	T C	C C	C C	T C	T C	C C	T C	C C	C C	C C	T C	C C	C C	C C	C C	C C	C C	T C	C C	C C	C C	C C	C C
8	8_11829459	0	11829459	G G	G G	A G	G G	G G	G G	A G	G G	G G	A G	G G	G G	A G	G G	G G	A G	G G	G G	G G	A G	G G	G G	A G	G G	G G	G G	G G	G G	G G	G G	G G	A G
8	8_11857125	0	11857125	A G	G G	A G	A G	G G	A G	A G	G G	G G	A G	A G	G G	A G	A G	G G	A G	A G	G G	A G	G G	G G	G G	A G	A A	G G	G G	G G	A G	G G	G G	A G	A G
8	8_11916603	0	11916603	G G	A G	G G	G G	G G	G G	G G	G G	G G	G G	G G	G G	G G	G G	G G	G G	G G	G G	G G	G G	G G	G G	G G	G G	G G	G G	G G	G G	G G	G G	G G	G G
8	8_11988594	0	11988594	C C	A C	C C	A C	C C	C C	C C	C C	C C	C C	A C	C C	C C	A A	C C	A C	A C	C C	C C	C C	C C	A C	C C	A C	C C	C C	A C	C C	C C	C C	C C	C C
8	8_12021566	0	12021566	G G	A G	G G	G G	G G	G G	G G	G G	G G	G G	G G	G G	G G	A G	G G	A G	G G	G G	G G	G G	G G	G G	G G	G G	G G	G G	A G	G G	G G	G G	G G	G G
8	8_12033033	0	12033033	T T	T T	C C	C T	C T	T T	T T	T T	T T	T T	C T	T T	T T	C C	T T	C T	C T	T T	C T	T T	T T	T T	C T	C T	T T	T T	T T	T T	T T	C T	C T	T T
8	8_12064918	0	12064918	T C	T C	T C	C C	C C	C C	T T	C C	C C	T C	C C	C C	T C	C C	C C	C C	C C	C C	T T	T C	T C	T C	C C	T C	T C	C C	C C	C C	T C	T C	C C	C C
8	8_12097911	0	12097911	T G	T T	G G	T G	T G	G G	T T	G G	G G	T G	T G	G G	T G	T T	G G	T G	T G	G G	G G	T T	T G	T G	G G	T G	T G	G G	G G	G G	T G	G G	T G	G G
8	8_12170083	0	12170083	G G	G G	G G	A G	G G	A G	G G	A A	A G	A G	G G	A A	A G	G G	A A	G G	A G	A G	G G	G G	G G	A G	A G	G G	A G	A G	G G	G G	G G	G G	G G	A G
8	8_12195652	0	12195652	G G	G G	A G	A G	G G	G G	G G	G G	A G	G G	A G	G G	G G	A G	G G	G G	A G	G G	G G	G G	G G	G G	A G	A G	G G	A G	G G	G G	G G	G G	G G	G G
8	8_12204881	0	12204881	C C	C C	T C	T C	C C	C C	C C	C C	T C	C C	T C	C C	C C	T T	C C	T C	T C	C C	C C	C C	C C	C C	T C	T C	C C	T C	C C	C C	C C	C C	C C	C C
8	8_12227264	0	12227264	G G	G G	A G	G G	G G	G G	G G	G G	G G	G G	G G	G G	G G	G G	G G	G G	G G	G G	A G	G G	G G	G G	G G	G G	G G	G G	G G	G G	G G	A G	G G	G G
8	8_12232828	0	12232828	G G	G T	G T	T T	G T	G T	G G	T T	T T	G T	G T	T T	G T	T T	T T	T T	T T	T T	G T	G G	G G	G T	T T	T T	G T	T T	T T	G T	G G	G G	G T	T T
8	8_12240057	0	12240057	C C	C C	T C	C C	C C	C C	C C	C C	C C	C C	C C	C C	C C	C C	C C	T C	C C	T C	C C	C C	C C	C C	T C	C C	C C	C C	T T	T C	C C	C C	C C	T C
8	8_12367235	0	12367235	A A	A A	A A	G A	G A	A A	G A	A A	G A	G A	G A	A A	G A	G G	A A	G G	G A	G A	A A	A A	A A	G A	A A	G A	A A	G A	G G	G A	A A	A A	G A	G A
8	8_12443592	0	12443592	C C	T C	C C	T C	T T	C C	C C	C C	T C	C C	T T	C C	C C	T C	C C	T C	T C	T C	C C	C C	T C	C C	C C	T C	C C	T C	T T	T C	T C	T C	T C	T C
8	8_12482982	0	12482982	G G	G G	G G	A G	G G	A G	G G	A A	A G	A G	G G	A A	A G	G G	A A	G G	A G	A G	G G	G G	G G	A G	A G	G G	A G	A G	G G	G G	G G	G G	G G	A G
8	8_12535837	0	12535837	C T	C T	T T	C T	T T	C T	T T	T T	C T	T T	C T	T T	T T	C C	T T	C C	C T	T T	T T	T T	T T	T T	T T	C T	T T	C T	C T	C T	T T	T T	C T	C T
8	8_12552941	0	12552941	G T	T T	T T	G T	G T	G T	G T	T T	T T	T T	G T	T T	T T	G T	T T	G T	G T	T T	G T	G T	G T	T T	T T	G G	G T	T T	G T	G T	G T	T T	G G	G T
8	8_12553051	0	12553051	G G	G G	G G	G G	G G	G G	G G	G G	G G	G G	G G	G G	G G	A A	G G	A A	G G	A G	G G	G G	G G	G G	G G	0 0	G G	G G	A A	A G	G G	G G	G G	G G
8	8_12553140	0	12553140	T C	C C	C C	T C	T C	T C	T C	C C	C C	C C	T C	C C	C C	T C	C C	T C	T C	C C	T C	C C	T C	C C	C C	T T	T C	C C	T C	T C	T C	C C	T T	T C
8	8_12553317	0	12553317	G G	A G	A G	A G	A A	G G	A G	G G	G G	G G	A A	G G	G G	A G	G G	G G	A G	G G	A G	A G	A A	A G	A G	A A	A G	G G	G G	G G	A A	A G	A G	G G
8	8_12557502	0	12557502	T T	T G	G G	T G	G G	T T	T G	T T	T T	T G	G G	T T	T G	G G	T T	G G	T G	T G	T G	T G	T G	T G	T G	G G	T T	T T	G G	T G	T G	T G	T G	T G
8	8_12580862	0	12580862	G A	A A	G A	A A	A A	G A	G A	A A	A A	A A	A A	A A	A A	A A	A A	A A	A A	A A	G A	A A	G A	A A	A A	A A	G A	A A	A A	G A	G A	G A	G A	A A
8	8_12623847	0	12623847	T T	T T	C T	T T	T T	T T	C T	T T	T T	C T	T T	T T	C T	T T	T T	T T	T T	T T	T T	T T	T T	T T	C T	T T	T T	T T	T T	T T	T T	T T	T T	T T
8	8_12769599	0	12769599	C C	C C	C C	C C	C C	C C	C C	C C	C C	C C	C C	C C	C C	C C	C C	T T	C C	C C	T C	C C	C C	C C	C C	C C	C C	C C	T C	C C	C C	T C	C C	T C
8	8_12823814	0	12823814	C C	C C	T C	C C	C C	C C	C C	C C	C C	C C	C C	C C	C C	C C	C C	C C	C C	C C	C C	C C	C C	C C	C C	C C	C C	C C	C C	C C	C C	C C	C C	C C
8	8_12824010	0	12824010	C C	C C	C T	T T	T T	C T	C T	T T	C T	C T	T T	T T	C T	C T	T T	C T	T T	C T	T T	C T	T T	T T	T T	T T	T T	C T	C T	C C	T T	T T	C T	T T
8	8_12893993	0	12893993	G A	G A	G A	G A	G G	G A	G A	A A	A A	A A	G G	A A	A A	G A	A A	A A	G A	A A	G A	G G	G G	A A	A A	G G	G A	A A	A A	A A	G G	G A	G G	A A
8	8_12934846	0	12934846	A A	A A	A A	A A	G A	A A	A A	A A	A A	A A	G A	A A	A A	A A	A A	A A	A A	A A	A A	G A	G A	A A	A A	A A	A A	A A	A A	A A	G A	G A	A A	A A
8	8_13121091	0	13121091	G G	A G	A A	G G	G G	G G	G G	G G	G G	G G	G G	G G	G G	A G	G G	A G	G G	G G	G G	G G	G G	G G	A G	G G	G G	G G	G G	G G	G G	G G	G G	G G
8	8_13171178	0	13171178	G G	G G	G G	G G	G G	G G	G G	G G	G G	G G	G G	G G	G G	G G	G G	G G	G G	G G	G G	G G	G G	G G	G G	G G	G G	G G	G G	G G	G G	G G	G G	G G
8	8_13213428	0	13213428	G G	G G	G G	A G	G G	G G	A G	G G	G G	A G	A G	G G	A G	A G	G G	G G	A G	G G	A G	G G	G G	G G	G G	A A	G G	G G	G G	G G	G G	G G	G G	G G
8	8_13213497	0	13213497	G G	G G	G G	A G	G G	G G	A G	G G	G G	A G	A G	G G	A G	A G	G G	G G	A G	G G	A G	G G	G G	G G	G G	A A	G G	G G	G G	G G	G G	G G	G G	G G
8	8_13253669	0	13253669	A A	G A	A A	A A	A A	A A	A A	G G	G A	G A	G A	G A	A A	G A	G G	G G	G A	G A	G A	A A	A A	G A	A A	A A	G A	G A	G A	G A	A A	G G	A A	G A
8	8_13253740	0	13253740	G G	A G	G G	G G	G G	G G	G G	G G	G G	G G	G G	G G	G G	A G	G G	A G	G G	G G	G G	G G	G G	A G	G G	G G	G G	G G	G G	G G	G G	G G	G G	G G
8	8_13253756	0	13253756	G G	A G	G G	G G	G G	G G	G G	A A	A G	A G	A G	A G	G G	A G	A A	A A	A G	A G	A G	G G	G G	A G	G G	G G	A G	A G	A G	A G	G G	A A	G G	A G
8	8_13325143	0	13325143	G A	A A	A A	A A	A A	A A	A A	A A	G A	A A	A A	A A	A A	A A	A A	A A	A A	G A	A A	A A	A A	A A	A A	A A	A A	G A	G A	G A	A A	A A	A A	A A
8	8_13357393	0	13357393	C A	A A	A A	A A	A A	A A	A A	A A	C A	A A	A A	A A	A A	A A	A A	A A	A A	C A	A A	A A	A A	A A	A A	A A	A A	C A	C A	C A	A A	A A	A A	A A
8	8_13405155	0	13405155	A A	A A	A A	C A	C A	A A	C A	A A	A A	C A	C A	A A	C A	C A	A A	A A	C A	A A	C A	C A	C A	C A	A A	C C	A A	A A	A A	A A	C A	A A	A A	A A
8	8_13473035	0	13473035	G G	G G	A G	A G	G G	G G	A G	G G	G G	A G	A G	G G	A G	A G	G G	G G	A G	G G	A G	G G	G G	A G	A G	A A	G G	G G	G G	G G	G G	G G	G G	G G
8	8_13486556	0	13486556	G A	A A	A A	G A	A A	G A	A A	A A	G A	A A	A A	G A	G A	A A	A A	A A	A A	G A	A A	A A	A A	A A	G A	A A	A A	G A	G A	G A	A A	A A	A A	G A
8	8_13489671	0	13489671	T C	C C	C C	C C	C C	C C	C C	C C	C C	C C	C C	C C	C C	C C	C C	C C	C C	C C	C C	C C	C C	C C	C C	C C	C C	C C	C C	C C	C C	C C	C C	C C
8	8_13529301	0	13529301	G G	A G	G G	G G	A G	G G	G G	A G	A G	A G	A G	G G	G G	A G	A G	A G	G G	A G	G G	A G	A G	G G	G G	G G	G G	G G	G G	A G	A G	A G	G G	G G
8	8_13542399	0	13542399	G G	G A	G G	G A	G A	G A	G G	A A	A A	G A	G A	A A	G A	G A	A A	A A	G A	A A	G A	G A	G A	G G	G A	G G	G A	A A	A A	A A	G A	A A	G G	A A
8	8_13592132	0	13592132	G G	G G	T G	G G	G G	G G	G G	G G	G G	G G	G G	G G	G G	G G	G G	G G	G G	G G	G G	G G	G G	G G	G G	G G	G G	G G	G G	G G	G G	G G	G G	G G
8	8_13599458	0	13599458	A G	G G	A G	A A	A G	A G	A G	G G	A G	A G	A G	A G	A A	A G	G G	G G	A G	A G	A G	A G	A G	A G	A A	A A	G G	A G	A G	A G	A G	G G	G G	A G
8	8_13733438	0	13733438	G A	G A	A A	A A	G A	A A	A A	G A	A A	A A	A A	G A	A A	G A	G A	G A	G A	A A	A A	G A	G A	A A	A A	A A	G A	G A	A A	A A	G A	A A	A A	A A
8	8_13733565	0	13733565	A G	A G	G G	G G	A G	G G	G G	A G	G G	G G	G G	A G	G G	A G	A G	A G	A G	G G	G G	A G	A G	G G	G G	G G	A G	A G	G G	G G	A G	G G	G G	G G
8	8_13757944	0	13757944	C T	C T	C T	C T	T T	C C	T T	C T	C T	T T	T T	C C	C T	T T	C T	T T	C T	C T	T T	C T	T T	T T	C T	T T	C T	C C	C T	C C	T T	T T	C T	C T
8	8_13768731	0	13768731	C C	C C	C C	T C	C C	T C	C C	C C	T C	C C	C C	T C	T C	C C	C C	C C	C C	T C	C C	C C	C C	C C	T C	C C	C C	T C	T C	T C	C C	C C	C C	T C
8	8_13836053	0	13836053	A G	A G	G G	A G	G G	A A	G G	G G	A G	G G	G G	A G	A G	G G	G G	A G	G G	A G	A G	A G	G G	A G	A G	G G	G G	A G	A A	A G	G G	A G	A G	A A
8	8_13888931	0	13888931	G G	A G	G G	G G	G G	G G	G G	G G	A G	G G	G G	G G	G G	A G	G G	A G	G G	A G	G G	G G	A G	G G	G G	G G	A G	A G	A G	A G	A G	G G	G G	G G
8	8_13944753	0	13944753	C C	T C	C C	C C	C C	C C	C C	C C	T C	C C	C C	C C	C C	T C	C C	T C	C C	T C	C C	C C	T C	C C	C C	C C	T C	T C	T C	T C	T C	C C	C C	C C
8	8_13968664	0	13968664	C C	C C	T T	C C	T C	C C	C C	T C	C C	C C	C C	T C	C C	C C	T C	C C	T C	C C	C C	C C	C C	C C	T C	C C	T C	T C	C C	T C	C C	C C	T C	C C
8	8_14029393	0	14029393	C T	C C	C T	T T	T T	C T	T T	T T	T T	T T	T T	T T	T T	C T	T T	C T	T T	T T	T T	C T	C T	T T	T T	T T	C T	T T	T T	C T	C T	T T	C T	T T
8	8_14036821	0	14036821	T C	C C	T C	T C	C C	C C	T T	T C	T C	T T	T T	C C	T C	T C	T C	C C	T C	T C	T C	C C	C C	T C	C C	T T	C C	C C	C C	T C	C C	T C	C C	C C
8	8_14037298	0	14037298	C T	C C	T T	T T	T T	C T	T T	T T	T T	T T	T T	T T	T T	C T	T T	C T	T T	T T	T T	C T	C T	T T	T T	T T	C T	T T	T T	T T	C T	T T	C T	T T
8	8_14080430	0	14080430	C C	C C	C C	A C	C C	A C	A C	A C	A A	A C	C C	A C	A C	C C	A C	C C	C C	A A	C C	C C	C C	C C	A C	C C	C C	A C	A C	A C	C C	C C	C C	A C
8	8_14116819	0	14116819	A G	G G	G G	A G	A G	A G	A G	A A	A A	A G	A G	A A	A G	G G	A A	A G	A G	A A	A G	G G	G G	A G	A G	G G	A G	A A	A A	A G	G G	A A	A G	A A
8	8_14185929	0	14185929	A A	A A	G A	G A	A A	A A	G A	A A	G A	G A	G A	A A	G A	G A	A A	A A	G A	G A	G A	A A	A A	A A	A A	G G	A A	G A	G A	G G	A A	A A	A A	A A
8	8_14208685	0	14208685	G G	G G	A G	A G	G G	G G	A G	G G	A G	A G	A G	G G	A G	A G	G G	G G	A G	A G	A G	G G	G G	G G	G G	A A	G G	A G	A G	A A	G G	G G	G G	G G
8	8_14250746	0	14250746	G G	G G	A G	G G	A G	G G	G G	G G	G G	G G	G G	G G	G G	G G	G G	G G	G G	G G	G G	A G	A G	G G	G G	G G	G G	G G	G G	A G	A G	G G	G G	G G
8	8_14399524	0	14399524	T T	T C	C C	T C	T T	T T	C C	C C	C C	C C	T C	T C	T C	C C	C C	C C	C C	C C	C C	T T	T C	T C	T C	C C	C C	C C	C C	C C	T C	T C	T T	T C
8	8_14511164	0	14511164	A A	A A	C A	A A	C A	A A	A A	A A	A A	A A	A A	A A	A A	A A	A A	A A	A A	A A	A A	A A	A A	A A	A A	A A	A A	A A	A A	C A	A A	A A	C A	A A
8	8_14565040	0	14565040	A A	C A	C A	A A	A A	A A	A A	A A	A A	A A	A A	A A	A A	C A	A A	C A	A A	A A	A A	A A	A A	C A	A A	A A	A A	A A	A A	C A	A A	A A	A A	A A
8	8_14566294	0	14566294	C C	T C	T C	C C	C C	C C	C C	C C	C C	C C	C C	C C	C C	T C	C C	T T	C C	C C	T C	C C	C C	T C	C C	C C	C C	C C	T C	T C	C C	T C	C C	T C
8	8_14629064	0	14629064	G A	A A	G A	G A	A A	A A	G A	A A	A A	G A	G G	A A	G A	G A	A A	A A	G A	A A	G A	A A	A A	A A	A A	G G	A A	A A	A A	G A	A A	G A	A A	A A
8	8_14680384	0	14680384	A C	A A	A C	A C	C C	A A	C C	A C	C C	C C	C C	A A	A C	A C	A C	A C	A C	C C	C C	A C	C C	A A	A A	C C	A C	A C	C C	C C	C C	C C	A C	A C
8	8_14691805	0	14691805	T T	C T	T T	T T	C T	T T	C T	C T	C C	C T	T T	T T	T T	T T	C T	C T	T T	C C	C T	T T	C T	T T	T T	T T	C T	C T	C C	C T	C T	C T	C T	C T
8	8_14716067	0	14716067	A G	A G	A G	A G	A G	A G	G G	A G	G G	G G	G G	A G	A G	A G	A G	A A	G G	G G	A G	A G	A G	A A	A A	G G	G G	A G	A G	G G	A G	A G	G G	A A
8	8_14724446	0	14724446	G G	T G	T G	T G	T G	T G	G G	G G	G G	G G	G G	T G	T G	T G	G G	T G	G G	G G	G G	G G	G G	T G	T G	G G	G G	G G	G G	T G	G G	G G	T G	T G
8	8_14773478	0	14773478	C C	C C	T C	C C	T C	C C	C C	C C	C C	C C	C C	C C	C C	C C	C C	C C	C C	C C	C C	C C	C C	C C	C C	C C	C C	C C	C C	T C	C C	C C	T C	C C
8	8_14822303	0	14822303	C C	T C	T C	T C	C C	T C	C C	C C	C C	C C	C C	T C	T C	T C	C C	T T	C C	C C	T C	C C	T C	T C	T T	C C	T C	C C	T C	C C	T C	T C	C C	T T
8	8_14825558	0	14825558	A A	G A	A A	G A	A A	G A	A A	A A	A A	A A	A A	G A	G A	G A	A A	G A	A A	A A	A A	A A	A A	A A	G A	A A	A A	A A	A A	A A	A A	A A	A A	G A
8	8_14929569	0	14929569	C C	C C	C C	C C	T C	C C	C C	C C	C C	C C	C C	C C	C C	C C	C C	T C	C C	C C	T C	T C	T C	C C	C C	C C	C C	C C	T C	C C	T C	T C	C C	T C
8	8_14945922	0	14945922	G G	T G	G G	T T	T G	T G	T G	G G	G G	T G	T T	T G	T T	T T	G G	T T	T G	G G	T T	T G	T G	T G	T G	T T	T G	G G	T G	G G	T G	T T	G G	T T
8	8_14995764	0	14995764	T C	T C	C C	T C	C C	C C	T C	T C	T C	T C	T C	T C	T C	T T	T C	T C	T T	T C	T C	C C	C C	C C	C C	T T	C C	T T	T C	T C	C C	C C	C C	C C
8	8_14998406	0	14998406	A G	G G	A G	A G	G G	G G	A G	G G	G G	A G	A A	G G	A G	A A	G G	A G	A G	G G	A G	G G	A G	A G	G G	A A	A A	G G	G G	A G	A G	A G	G G	G G
8	8_14998566	0	14998566	C T	T T	C T	C T	T T	T T	C T	T T	T T	C T	C C	T T	C T	C C	T T	C T	C T	T T	C T	T T	C T	C T	T T	C C	C C	T T	T T	C T	C T	C T	T T	T T
8	8_14998647	0	14998647	T G	G G	T G	T G	G G	G G	T G	G G	G G	T G	T T	G G	T G	T T	G G	T G	T G	G G	T G	G G	T G	T G	G G	T T	T T	G G	G G	T G	T G	T G	G G	G G
8	8_15035043	0	15035043	T T	T T	C T	T T	T T	T T	T T	T T	T T	T T	T T	T T	T T	T T	T T	T T	T T	T T	T T	T T	C T	T T	T T	T T	C T	T T	T T	C T	C T	T T	T T	T T
8	8_15066681	0	15066681	A A	A A	C A	A A	A A	A A	A A	A A	A A	A A	A A	A A	A A	A A	A A	A A	A A	A A	A A	A A	C A	A A	A A	A A	C A	A A	A A	C A	C A	A A	A A	A A
8	8_15084030	0	15084030	A G	A A	A G	G G	A G	A G	G G	G G	G G	G G	G G	G G	G G	A G	A G	A G	G G	G G	G G	A A	A A	G G	G G	G G	A G	G G	G G	A G	A A	G G	A G	G G
8	8_15112824	0	15112824	T T	T T	C T	T T	T T	T T	T T	T T	T T	T T	T T	T T	T T	T T	T T	T T	T T	T T	T T	T T	T T	T T	T T	T T	T T	T T	T T	C T	T T	T T	T T	T T
8	8_15140926	0	15140926	G G	G G	A A	G G	A A	G G	G A	0 0	A A	0 0	G A	G A	G G	G A	G G	A A	G A	A A	G A	G A	A A	G A	G A	G G	A A	G A	A A	A A	A A	A A	G A	G A
8	8_15143909	0	15143909	A A	A A	C C	A A	C C	A A	A A	A A	C A	A A	C A	C A	A A	C A	A A	C A	C A	C A	A A	C A	C C	C A	C A	A A	C C	C A	C A	C C	C C	C A	C A	A A
8	8_15148224	0	15148224	T T	T T	T T	T T	T T	T T	G T	G T	G T	G T	T T	T T	T T	T T	T T	G T	T T	G T	G T	T T	G T	G T	T T	T T	G T	T T	G T	T T	G T	G T	T T	G T
8	8_15148353	0	15148353	A A	A A	A A	A A	A A	A A	C A	C A	C A	C A	A A	A A	A A	A A	A A	C A	A A	C A	C A	A A	C A	C A	A A	A A	C A	A A	C A	A A	C A	C A	A A	C A
8	8_15164018	0	15164018	A A	A A	G A	A A	A A	A A	G A	G A	G A	G A	A A	A A	A A	A A	A A	G A	A A	G A	G A	A A	A A	A A	A A	A A	A A	A A	G A	G A	A A	G A	A A	G A
8	8_15172631	0	15172631	A G	A G	G G	A G	A G	A G	G G	A G	A G	G G	G G	A A	A G	G G	A A	G G	A G	A G	G G	G G	G G	A G	A G	G G	G G	A A	A G	A G	G G	G G	A G	A G
8	8_15238813	0	15238813	C C	C C	T C	C C	C C	C C	C C	C C	C C	C C	C C	C C	C C	C C	C C	C C	C C	C C	C C	C C	C C	C C	C C	C C	C C	C C	C C	T C	C C	C C	C C	C C
8	8_15242658	0	15242658	G G	G G	A G	G G	G G	G G	A G	A G	A G	A G	G G	G G	G G	G G	G G	A G	G G	A G	A G	G G	A G	A G	G G	G G	A G	G G	A G	A G	A G	A G	G G	A G
8	8_15248338	0	15248338	T T	T T	T T	T T	T T	T T	C T	C T	C T	C T	T T	T T	T T	T T	T T	C T	T T	C T	C T	T T	C T	C T	T T	T T	C T	T T	C T	T T	C T	C T	T T	C T
8	8_15280375	0	15280375	G G	G G	G G	G G	A G	G G	G G	G G	G G	G G	G G	G G	G G	A G	G G	A G	G G	G G	G G	A G	A G	G G	G G	G G	G G	G G	G G	G G	A G	G G	G G	G G
8	8_15436180	0	15436180	G G	G G	A G	G G	G G	G G	G G	G G	G G	G G	G G	G G	G G	G G	G G	G G	G G	G G	G G	G G	G G	G G	G G	G G	G G	G G	G G	A G	G G	G G	G G	G G
8	8_15462645	0	15462645	G G	G G	G G	G G	G G	G G	G G	G G	G G	G G	G G	G G	G G	G G	G G	G G	G G	G G	G G	G G	A G	A G	G G	G G	A G	G G	G G	G G	A G	G G	G G	G G
8	8_15462710	0	15462710	A A	A A	A A	A A	A A	A A	A A	A A	A A	A A	A A	A A	A A	A A	A A	A A	A A	A A	A A	A A	G A	G A	A A	A A	G A	A A	A A	A A	G A	A A	A A	A A
8	8_15510948	0	15510948	T C	C C	T C	T C	T C	T C	C C	T C	C C	C C	C C	T C	T C	T C	T T	T C	C C	C C	C C	T C	T T	T T	T C	C C	T C	T C	C C	T C	T T	C C	C C	T C
8	8_15510959	0	15510959	T C	C C	T C	T C	T C	T C	C C	T C	C C	C C	C C	T C	T C	T C	T T	T C	C C	C C	C C	T C	T C	T C	T C	C C	C C	T C	C C	T C	T C	C C	C C	T C
8	8_15511330	0	15511330	G G	G G	G G	A G	A G	G G	A G	G G	A G	A G	A G	A G	A G	A G	G G	G G	A A	A G	A G	G G	G G	G G	G G	A A	G G	A G	A G	A G	G G	G G	A G	G G
8	8_15561374	0	15561374	G G	A G	G G	G G	G G	G G	G G	G G	G G	G G	G G	G G	G G	G G	A G	G G	G G	G G	G G	G G	G G	G G	G G	G G	G G	G G	G G	G G	G G	G G	G G	G G
8	8_15700721	0	15700721	C C	C C	C C	C C	C C	C C	T C	T C	T C	T C	C C	C C	C C	C C	T C	C C	C C	T C	C C	C C	C C	T C	C C	C C	C C	C C	C C	T C	C C	C C	C C	C C
8	8_15706345	0	15706345	G G	G G	T T	T T	T T	G T	T T	T T	T T	T T	T T	T T	T T	T T	T T	G T	T T	T T	G T	G T	G T	T T	T T	T T	G T	T T	G T	T T	G T	G T	G T	G T
8	8_15770530	0	15770530	A A	A A	A A	A A	A A	A A	G A	A A	G A	G A	A A	G A	G A	A A	G A	A A	G A	A A	A A	A A	A A	A A	A A	A A	A A	G A	G A	G A	A A	A A	A A	A A
8	8_15812675	0	15812675	C C	C C	T C	C C	T T	C C	C C	C C	T C	C C	C C	T C	C C	C C	C C	C C	T C	T C	C C	T C	T C	C C	C C	C C	C C	T C	T C	T C	T C	C C	T C	C C
8	8_15825524	0	15825524	G A	G A	G A	A A	G G	G A	A A	A A	G A	A A	A A	G A	A A	A A	A A	A A	G A	G A	A A	G G	G A	A A	A A	A A	A A	G A	G A	G A	G A	A A	G G	A A
8	8_15840735	0	15840735	G G	G G	G G	G G	G G	G G	G G	G G	G G	G G	G G	G G	G G	G G	T G	G G	G G	G G	G G	G G	G G	T G	G G	G G	G G	G G	G G	G G	G G	G G	G G	G G
8	8_15841240	0	15841240	A G	A A	A G	A G	G G	A G	G G	G G	G G	G G	A G	G G	G G	A A	G G	A A	A G	G G	A A	A G	G G	G G	G G	A A	G G	G G	A G	G G	G G	A G	A G	A G
8	8_15889530	0	15889530	T T	T T	C T	T T	C T	T T	C C	C T	C C	C C	C T	C T	C T	T T	T T	T T	C T	C T	T T	C T	C C	T T	C T	T T	C C	C T	C T	C T	C C	C T	T T	T T
8	8_15979463	0	15979463	G G	G G	G G	G G	A G	G G	G G	G G	G G	G G	G G	G G	G G	G G	G G	G G	G G	G G	G G	A G	A G	G G	G G	G G	G G	G G	G G	G G	A G	G G	G G	G G
8	8_16007969	0	16007969	G G	G G	G G	G G	G G	G G	A G	G G	G G	A G	A G	G G	A G	G G	A G	A G	G G	G G	A G	G G	G G	G G	G G	G G	A G	G G	A G	A G	G G	A A	G G	G G
8	8_16028660	0	16028660	C T	C C	T T	T T	T T	C T	T T	T T	T T	T T	C T	T T	T T	C T	T T	C C	T T	T T	C T	C T	T T	T T	T T	T T	C T	T T	C T	C T	T T	C C	C T	T T
8	8_16028789	0	16028789	C A	C C	A A	A A	A A	C A	A A	A A	A A	A A	C A	A A	A A	C A	A A	C C	A A	A A	C A	C A	A A	A A	A A	A A	C A	A A	C A	C A	A A	C C	C A	A A
8	8_16028807	0	16028807	G A	G G	A A	A A	A A	G A	A A	A A	A A	A A	G A	A A	A A	G A	A A	G G	A A	A A	G A	G A	A A	A A	A A	A A	G A	A A	G A	G A	A A	G G	G A	A A
8	8_16071303	0	16071303	C C	C C	T C	C C	C C	C C	C C	C C	C C	C C	C C	C C	C C	C C	C C	C C	C C	C C	C C	C C	C C	C C	C C	C C	C C	C C	C C	C C	C C	C C	C C	C C
8	8_16085130	0	16085130	G G	A G	G G	A A	A G	G G	A G	G G	G G	A G	A G	G G	A A	A G	G G	G G	A G	G G	A G	A G	A G	G G	G G	A A	G G	G G	G G	G G	A G	G G	G G	G G
8	8_16143639	0	16143639	T T	T C	T C	T C	C C	T C	C C	C C	C C	C C	T C	C C	C C	T T	C C	T C	T C	C C	T C	T C	C C	T C	C C	T T	C C	C C	C C	T C	C C	C C	T C	C C
8	8_16214049	0	16214049	C C	C C	C C	C C	C C	C C	C C	C C	C C	C C	C C	T C	C C	C C	C C	T C	T C	C C	T C	C C	C C	C C	C C	C C	C C	T C	T C	C C	C C	T C	C C	C C
8	8_16231949	0	16231949	G T	G T	T T	T T	T T	G T	T T	T T	T T	T T	T T	T T	T T	G T	T T	G T	T T	T T	T T	G T	T T	T T	T T	T T	T T	T T	T T	G T	T T	T T	G T	T T
8	8_16237464	0	16237464	C T	C T	T T	T T	T T	C T	T T	T T	T T	T T	T T	T T	T T	C T	T T	C T	T T	T T	T T	C T	T T	T T	T T	T T	T T	T T	T T	C T	T T	T T	C T	T T
8	8_16240827	0	16240827	C T	C T	T T	T T	T T	C T	T T	T T	T T	T T	T T	T T	T T	C T	T T	C T	T T	T T	T T	C T	T T	T T	T T	T T	T T	T T	T T	C T	T T	T T	C T	T T
8	8_16249625	0	16249625	A C	A C	C C	C C	A C	A C	C C	C C	C C	C C	C C	C C	C C	A C	C C	A C	C C	C C	C C	A A	A C	C C	C C	C C	C C	C C	C C	A C	A C	C C	A C	C C
8	8_16265632	0	16265632	G G	G G	G G	G G	G G	G G	A A	A G	A A	A A	A G	A G	A G	G G	A G	A G	A G	A G	A G	G G	A G	G G	G G	G G	A A	A A	A G	A G	A G	A A	G G	G G
8	8_16299948	0	16299948	T G	G G	T G	T G	T G	G G	T T	T G	T T	T T	T G	T G	T G	T G	G G	G G	T T	T G	T G	T G	T G	T G	T G	T T	G G	T G	T G	G G	T G	G G	G G	G G
8	8_16305012	0	16305012	T C	C C	T C	C C	C C	C C	C C	C C	C C	C C	C C	C C	C C	C C	C C	C C	C C	C C	C C	T C	C C	C C	C C	C C	C C	T C	T C	C C	T C	C C	C C	C C
8	8_16371581	0	16371581	C T	C C	T T	C T	C T	C C	T T	C T	T T	T T	T T	C T	C T	C T	C C	C C	T T	C T	C T	C T	C T	C C	C T	T T	C T	T T	T T	C T	C T	C T	C C	C C
8	8_16402359	0	16402359	T C	T T	C C	T C	T C	T T	C C	T C	C C	C C	C C	T C	T C	T C	T T	T T	C C	T C	T C	T C	T C	T T	T C	C C	T C	C C	C C	T C	T C	T C	T T	T T
8	8_16402582	0	16402582	G A	G G	A A	G A	G A	G G	A A	G A	A A	A A	A A	G A	G A	G A	G G	G G	A A	G A	G A	G A	G A	G G	G A	A A	G A	A A	A A	G A	G A	G A	G G	G G
8	8_16406427	0	16406427	T C	T T	C C	T C	T C	T T	C C	T C	C C	C C	C C	T C	T C	T C	T T	T T	C C	T C	T C	T C	T C	T T	T C	C C	T C	C C	C C	T C	T C	T C	T T	T T
8	8_16425878	0	16425878	C T	T T	C T	T T	C T	T T	C C	C T	C C	C C	T T	C T	C T	T T	T T	T T	C T	C T	T T	C T	C T	T T	C T	T T	T T	C T	T T	T T	C T	T T	T T	T T
8	8_16464230	0	16464230	C T	C C	T T	C T	C T	C C	T T	C T	T T	T T	T T	C T	C T	C T	C C	C C	T T	C T	C T	C T	C T	C T	C T	T T	C T	T T	T T	C T	C T	C T	C C	C C
8	8_16495053	0	16495053	A G	A G	G G	G G	G G	A G	G G	G G	G G	G G	G G	G G	G G	A G	A G	A A	G G	G G	A G	A G	A G	G G	G G	G G	A G	G G	G G	G G	A G	A G	A G	G G
8	8_16551018	0	16551018	A G	G G	A G	G G	G G	G G	A G	A G	A G	A G	G G	G G	G G	G G	G G	G G	G G	A G	G G	A G	G G	G G	G G	G G	G G	G G	A G	G G	A G	G G	G G	G G
8	8_16551053	0	16551053	C T	T T	C T	T T	T T	T T	C T	C T	C T	C T	T T	T T	T T	T T	T T	T T	T T	C T	T T	C T	T T	T T	T T	T T	T T	T T	C T	T T	C T	T T	T T	T T
8	8_16636299	0	16636299	T C	T C	T C	C C	C C	T C	T T	T C	T T	T T	T C	T C	T C	C C	T C	C C	T C	T C	C C	T C	T C	T C	C C	C C	T T	T C	T C	C C	T C	T C	T C	C C
8	8_16637891	0	16637891	G G	G G	G G	G G	A G	G G	G G	G G	G G	G G	G G	G G	G G	G G	G G	G G	G G	G G	G G	G G	A G	G G	G G	G G	G G	G G	G G	A G	G G	G G	G G	G G
8	8_16760388	0	16760388	G G	G A	A A	A A	G G	G A	G A	G A	G A	G A	A A	A A	A A	G A	A A	G G	A A	G G	G A	G G	G A	G A	A A	A A	A A	A A	G A	G A	G A	G A	G G	G A
8	8_16830638	0	16830638	T T	T T	C T	C T	C T	T T	T T	T T	T T	T T	C C	T T	T T	C T	T T	T T	C T	C T	C T	T T	T T	T T	T T	C C	C T	T T	T T	C T	T T	C T	C T	C T
8	8_16985174	0	16985174	C T	C T	C T	T T	C T	C T	T T	T T	T T	T T	T T	T T	T T	C T	T T	C T	T T	C T	T T	C T	T T	T T	T T	T T	T T	T T	T T	C T	T T	T T	C C	C T
8	8_17000222	0	17000222	C C	C C	C C	C C	C C	C C	C C	C C	C C	C C	C C	C C	C C	C C	C C	C C	C C	C C	C C	C C	C C	C C	C C	C C	C C	T C	T T	T C	C C	C C	C C	C C
8	8_17017663	0	17017663	A A	A A	A A	A A	A A	A A	A A	A A	A A	A A	A A	A A	A A	A A	A A	A A	A A	A A	A A	A A	A A	A A	A A	A A	A A	G A	G G	G A	A A	A A	A A	A A
8	8_17028178	0	17028178	A A	A A	0 0	G A	A A	A A	A A	A A	A A	A A	G A	A A	A A	G A	A A	G A	G A	A A	G G	G A	A A	A A	G A	G G	A A	A A	A A	A A	G A	G A	A A	A A
8	8_17110420	0	17110420	C C	C C	C C	C C	C C	C C	C C	C C	C C	C C	C C	C C	C C	C C	C C	C C	C C	C C	C C	C C	C C	C C	C C	C C	C C	T C	T T	T C	C C	C C	C C	C C
8	8_17115593	0	17115593	T C	T C	C C	C C	C C	T C	C C	C C	C C	C C	C C	C C	C C	T C	C C	T C	C C	C C	C C	T C	C C	C C	C C	C C	C C	C C	C C	C C	C C	C C	T C	C C
8	8_17229110	0	17229110	A A	A A	G A	A A	A A	A A	A A	A A	A A	A A	A A	A A	A A	A A	A A	G A	A A	A A	G A	G A	A A	G A	G A	A A	A A	A A	A A	A A	G A	G A	A A	A A
8	8_17288265	0	17288265	G G	G G	A G	G G	G G	G G	G G	G G	G G	G G	A G	G G	G G	G G	G G	A G	G G	G G	A G	A G	G G	A G	G G	G G	A G	G G	G G	A G	A G	A A	G G	G G
8	8_17310880	0	17310880	T C	T T	C C	T C	T C	T C	C C	T C	C C	C C	C C	T C	T C	C C	T C	C C	C C	C C	C C	C C	T C	T C	T C	C C	C C	T C	T T	C C	C C	C C	C C	T C
8	8_17343986	0	17343986	C C	C C	C C	T C	C C	T C	C C	C C	C C	C C	T C	C C	C C	T C	C C	T C	T C	C C	T T	T C	C C	C C	C C	T T	C C	C C	C C	C C	C C	T C	T C	C C
8	8_17364366	0	17364366	G A	A A	G A	G A	G A	A A	G A	A A	G A	G A	G A	G G	G A	G G	A A	G G	G G	G A	G G	A A	A A	G A	G A	G G	A A	G A	A A	G A	A A	G A	G A	G A
8	8_17364556	0	17364556	C T	T T	C T	C T	C T	T T	C T	T T	C T	C T	C T	C C	C T	C C	C T	C C	C C	C T	C C	T T	C T	C T	C T	C C	C T	C T	T T	C T	C T	C T	C T	C T
8	8_17404050	0	17404050	G A	A A	A A	A A	A A	A A	A A	A A	A A	A A	A A	A A	A A	A A	A A	A A	A A	A A	A A	A A	A A	A A	A A	A A	A A	A A	A A	A A	A A	A A	A A	A A
8	8_17407215	0	17407215	A G	A G	A G	G G	G G	G G	G G	G G	G G	G G	G G	G G	G G	G G	A G	G G	G G	G G	G G	G G	G G	G G	G G	G G	G G	A G	A A	G G	G G	G G	G G	G G
8	8_17502832	0	17502832	G A	G A	G G	G A	G A	G A	G G	G A	A A	G G	A A	G A	G G	A A	G G	A A	A A	G G	G A	G A	A A	G G	G G	A A	G A	A A	A A	G G	G A	G A	G A	G G
8	8_17541889	0	17541889	G A	A A	G A	G G	G A	A A	G A	G G	G A	G A	G A	G G	A A	G A	G A	A A	G A	G A	A A	G A	G A	G A	G A	A A	G G	G A	G A	G A	G G	G A	G A	G A
8	8_17666455	0	17666455	C C	T C	C C	T C	T C	T C	T C	T C	C C	T C	C C	C C	T C	T C	T C	T C	C C	T C	C C	C C	T C	T C	T C	C C	C C	C C	T C	T C	C C	C C	C C	T C
8	8_17719721	0	17719721	G G	A G	G G	A G	G G	A G	G G	G G	G G	G G	G G	G G	A G	A G	G G	G G	G G	A G	G G	G G	A G	A G	A G	G G	G G	G G	G G	A G	A G	G G	G G	A G
8	8_17720084	0	17720084	C C	T C	C C	T C	C C	T C	C C	C C	C C	C C	C C	C C	T C	T C	C C	C C	C C	T C	C C	C C	T C	T C	T C	C C	C C	C C	C C	T C	T C	C C	C C	T C
8	8_17723390	0	17723390	C C	C C	C C	A C	A C	C C	C C	C C	C C	C C	C C	A C	C C	C C	C C	C C	C C	A C	C C	C C	C C	C C	C C	C C	C C	C C	C C	A C	C C	C C	A C	A C
8	8_17767256	0	17767256	A A	A A	A A	A A	A A	A A	A A	A A	A A	A A	C A	A A	A A	A A	A A	A A	A A	A A	A A	C A	A A	A A	A A	A A	C A	C A	A A	A A	A A	C A	A A	A A
8	8_17792600	0	17792600	G A	A A	G A	A A	A A	A A	A A	A A	A A	A A	A A	A A	A A	A A	A A	A A	A A	A A	A A	A A	A A	A A	A A	A A	A A	A A	A A	A A	A A	A A	A A	A A
8	8_17819161	0	17819161	A A	A A	A A	A A	A A	A A	A A	A A	A A	A A	G A	A A	A A	A A	A A	A A	A A	A A	A A	G A	A A	A A	A A	A A	G A	G A	A A	A A	A A	G A	A A	A A
8	8_17843498	0	17843498	T T	G T	G T	G T	T T	G G	G T	G T	G T	G T	T T	G T	G G	G G	T T	G T	G T	G T	T T	T T	G T	G T	G T	T T	T T	T T	T T	G T	G T	T T	G T	G T
8	8_17879679	0	17879679	G G	G G	G G	G G	G G	G G	G G	G G	G G	G G	G G	G G	G G	G G	T T	T G	G G	G G	G G	T G	G G	T G	G G	G G	T G	G G	G G	G G	T G	G G	G G	G G
8	8_17883095	0	17883095	C C	C C	C C	C C	C C	C C	C C	C C	C C	C C	C C	C C	C C	C C	T T	T C	C C	C C	C C	T C	C C	T C	C C	C C	T C	C C	C C	C C	T C	C C	C C	C C
8	8_17926607	0	17926607	A C	C C	C C	C C	C C	C C	C C	C C	C C	C C	C C	C C	C C	C C	C C	C C	C C	C C	C C	C C	C C	C C	C C	C C	C C	C C	C C	C C	C C	C C	C C	C C
8	8_17994479	0	17994479	C T	T T	C T	C T	C C	T T	T T	T T	T T	T T	T T	C T	T T	T T	C T	T T	T T	C T	T T	C T	C T	C T	T T	T T	T T	T T	T T	C T	T T	T T	C T	C T
8	8_17994650	0	17994650	A A	A C	A A	A C	A A	C C	C C	C C	A A	C C	C C	A A	C C	C C	A C	C C	A C	A C	C C	A C	A C	A C	C C	C C	C C	A A	A C	A C	C C	C C	A C	A C
8	8_17995049	0	17995049	T C	C C	T C	T C	T T	C C	C C	C C	C C	C C	C C	T C	C C	C C	T C	C C	C C	T C	C C	T C	T C	T C	C C	C C	C C	C C	C C	T C	C C	C C	T C	T C
8	8_18012404	0	18012404	T T	T C	T T	T C	T T	C C	C C	C C	T T	C C	C C	T T	C C	C C	T C	C C	T C	T C	C C	T C	T C	T C	C C	C C	C C	T T	T C	T C	C C	C C	T C	T C
8	8_18021667	0	18021667	A G	G G	A A	A G	A A	G G	G G	G G	A G	G G	G G	A A	G G	G G	A G	G G	A G	A G	G G	A G	A G	A G	G G	G G	G G	G G	G G	A G	G G	G G	A G	A G
8	8_18101000	0	18101000	G G	G G	A G	A G	A G	G G	G G	G G	A G	G G	G G	A A	G G	G G	G G	G G	A G	A G	G G	G G	G G	A G	G G	G G	G G	A G	G G	A G	G G	G G	A G	A G
8	8_18120526	0	18120526	A A	A A	G A	G A	G A	A A	A A	A A	G A	A A	A A	G G	A A	A A	A A	A A	G A	G A	A A	A A	A A	G A	A A	A A	A A	A A	A A	G A	A A	A A	G A	G A
8	8_18370247	0	18370247	G T	T T	T T	T T	T T	T T	T T	T T	T T	T T	T T	T T	T T	T T	T T	T T	T T	T T	T T	T T	T T	T T	T T	T T	T T	T T	T T	T T	T T	T T	T T	T T
8	8_18399867	0	18399867	C C	C C	C C	A C	A C	C C	C C	C C	C C	C C	C C	A C	0 0	C C	C C	C C	C C	A C	C C	C C	C C	C C	A C	C C	C C	C C	C C	A C	C C	C C	A C	A C
8	8_18420777	0	18420777	T C	C C	C C	T C	T C	C C	C C	C C	C C	C C	C C	T C	C C	C C	C C	C C	C C	T C	C C	C C	C C	C C	T C	C C	C C	C C	C C	T C	C C	C C	T C	T C
8	8_18421106	0	18421106	A G	G G	G G	A G	A G	G G	G G	G G	G G	G G	G G	A G	G G	G G	G G	G G	G G	A G	G G	G G	G G	G G	A G	G G	G G	G G	G G	A G	G G	G G	A G	A G
8	8_18489045	0	18489045	A A	A G	A G	A G	G G	G G	A G	A G	A G	A G	A A	A G	G G	A G	G G	G G	A A	A G	A A	G G	A G	G G	A G	A A	A G	G G	A G	G G	A G	A A	G G	G G
8	8_18535134	0	18535134	G G	G G	G G	A G	A G	G G	G G	G G	G G	G G	G G	A G	G G	G G	G G	G G	G G	A G	G G	G G	G G	G G	A G	G G	G G	A G	G G	A G	G G	G G	A G	A G
8	8_18583898	0	18583898	T T	T T	T T	C T	C T	T T	T T	T T	T T	T T	T T	C T	T T	T T	T T	T T	T T	C T	T T	T T	T T	T T	C T	T T	T T	T T	T T	C T	T T	T T	C T	C T
8	8_18600255	0	18600255	T T	T T	T T	G T	G T	T T	G T	T T	T T	G T	T T	G T	G T	T T	T T	T T	T T	G T	T T	T T	T T	T T	G T	T T	T T	T T	T T	G T	T T	T T	G T	G T
8	8_18611435	0	18611435	C T	C T	T T	C T	C T	C C	T T	C T	C T	T T	T T	T T	C T	C C	T T	C C	C T	C T	C T	C C	C C	C T	C T	C T	C T	C T	C T	C T	C C	C T	C T	C T
8	8_18615429	0	18615429	C T	C T	C C	C T	C T	T T	C T	C T	C T	C T	C T	C C	C T	T T	C C	T T	C T	C T	C T	T T	T T	T T	C T	T T	C T	C T	C T	C T	T T	C T	C T	C T
8	8_18616735	0	18616735	G T	G T	G T	G T	G T	T T	T T	G T	T T	T T	T T	G T	T T	T T	G G	T T	T T	G T	G T	T T	T T	T T	G T	T T	T T	G T	G T	G T	T T	T T	G T	G T
8	8_18635629	0	18635629	G G	G G	A G	G G	G G	G G	G G	A G	G G	G G	G G	G G	G G	G G	A G	G G	G G	G G	G G	G G	G G	G G	G G	G G	G G	A G	A G	G G	G G	G G	G G	G G
8	8_18635705	0	18635705	T T	T T	T T	T C	T C	T C	C C	T C	T C	C C	C C	T T	T C	C C	T T	C C	T C	T C	C C	C C	C C	T C	T C	C C	C C	T C	T C	T C	C C	C C	T T	T C
8	8_18675146	0	18675146	T C	T T	T C	C C	T C	T T	T C	T T	C C	T C	T C	C C	T C	T C	C C	T C	C C	C C	C C	T C	T C	T T	C C	T C	C C	T C	T C	T C	C C	C C	T C	T C
8	8_18685690	0	18685690	C C	C C	T C	C C	C C	C C	C C	T C	C C	C C	C C	C C	C C	C C	C C	C C	C C	C C	C C	C C	C C	C C	C C	C C	C C	T C	T C	C C	C C	C C	C C	C C
8	8_18714248	0	18714248	C C	C C	C C	C C	C C	C C	T C	C C	C C	T C	T C	C C	C C	C C	C C	C C	C C	C C	C C	C C	C C	C C	C C	T C	C C	C C	C C	C C	C C	C C	C C	C C
8	8_18741815	0	18741815	T T	T T	T T	C T	C T	T T	C T	T T	T T	C T	C T	C T	T T	T T	T T	T T	C T	C C	C C	T T	C T	T T	C C	C C	T T	T T	T T	C T	C T	C T	C T	C T
8	8_18794152	0	18794152	G G	G G	G A	A A	G A	G G	A A	G A	G A	A A	A A	G A	G A	A A	A A	A A	G A	A A	A A	G A	G A	G A	A A	A A	A A	A A	A A	G A	A A	A A	G A	G A
8	8_18847880	0	18847880	G G	G G	A G	G G	G G	G G	G G	A G	G G	G G	G G	G G	G G	A G	G G	A G	G G	G G	G G	G G	G G	G G	G G	G G	G G	A G	A G	G G	G G	G G	G G	G G
8	8_18953298	0	18953298	T T	T T	C T	C T	T T	T T	T T	C T	C T	T T	T T	T T	T T	C C	T T	C C	T T	T T	T T	C T	T T	C T	T T	T T	C T	C C	C C	T T	C T	T T	T T	T T
8	8_19006526	0	19006526	C C	C C	A C	C C	C C	C C	A C	A C	C C	A C	A C	C C	C C	A C	C C	A C	C C	C C	C C	C C	C C	C C	C C	A C	C C	A C	A C	C C	C C	C C	C C	C C
8	8_19063768	0	19063768	G G	T G	T G	G G	G G	T G	G G	G G	T G	G G	G G	T G	G G	G G	G G	G G	T G	G G	T G	T G	G G	T G	G G	G G	G G	G G	G G	G G	G G	G G	G G	T G
8	8_19101656	0	19101656	C C	C C	C C	T C	T C	C C	T T	T C	C C	T T	T T	T C	T C	C C	T C	C C	T C	T C	T C	C C	T C	C C	T C	T T	T C	C C	C C	T T	T C	T T	T C	T C
8	8_19118089	0	19118089	C T	T T	C T	C T	T T	T T	T T	T T	C C	T T	T T	C T	T T	C T	C T	C T	C T	T T	T T	C C	T T	T T	C T	T T	C T	C T	T T	T T	C T	T T	T T	T T
8	8_19207876	0	19207876	G G	A G	A G	A G	A G	G G	A G	A G	A G	A G	A G	A A	G G	G G	A A	G G	A G	A G	G G	G G	G G	G G	A A	A G	G G	G G	G G	A A	G G	G G	A G	A G
8	8_19244358	0	19244358	C T	T T	T T	T T	T T	T T	T T	C T	C T	T T	T T	T T	T T	T T	T T	T T	C T	C T	C T	C C	C T	T T	T T	C T	C T	C T	T T	T T	C C	C T	T T	T T
8	8_19245903	0	19245903	G G	G G	A G	A G	G G	G G	G G	G G	G G	G G	G G	G G	G G	A A	G G	A G	G G	G G	G G	G G	G G	G G	G G	G G	G G	A G	A G	G G	G G	G G	G G	G G
8	8_19246822	0	19246822	G G	A G	A G	A G	A G	G G	A G	A G	A G	A G	A G	A A	G G	G G	A A	G G	A G	A G	A G	G G	G G	G G	A A	A G	G G	G G	G G	A A	G G	G G	A G	A G
8	8_19270764	0	19270764	C T	T T	C T	C T	T T	T T	T T	T T	C T	T T	T T	T T	T T	C C	T T	C T	T T	T T	T T	C T	T T	T T	T T	T T	C T	C C	C T	T T	C T	T T	T T	T T
8	8_19290545	0	19290545	A C	A C	A C	A C	C C	A C	A C	A A	A C	A C	A C	C C	C C	A A	C C	A C	A C	A C	A C	A A	A C	C C	C C	A A	A C	A A	A C	A C	A A	A C	C C	A C
8	8_19348855	0	19348855	C C	T C	C C	C C	C C	C C	C C	T C	C C	C C	C C	C C	C C	C C	C C	C C	T C	C C	T C	T C	T C	C C	C C	T C	C C	C C	C C	C C	T C	T C	C C	C C
8	8_19351883	0	19351883	C T	C T	C T	C T	T T	C T	C T	C T	C T	C T	C T	T T	T T	C C	T T	C T	C T	T T	C T	C C	C T	T T	T T	C C	C T	C C	C T	T T	C C	C T	T T	C T
8	8_19369987	0	19369987	A A	A A	G A	G A	A A	G A	G G	A A	A A	G G	G G	A A	A A	G G	A A	G G	A A	A A	A A	A A	A A	A A	A A	G A	A A	G A	G A	A A	A A	A A	A A	G A
8	8_19476514	0	19476514	A C	A A	A A	C C	A C	A C	A C	A C	A C	A C	A C	A C	A A	C C	C C	C C	A A	C C	A C	A C	A A	A C	A C	A C	C C	C C	C C	C C	A C	A C	A C	C C
8	8_19499030	0	19499030	C T	C C	T T	T T	C T	C T	T T	C T	T T	T T	T T	T T	C T	T T	T T	T T	C T	T T	C T	C T	C C	C T	T T	C T	T T	T T	T T	T T	C T	C T	C T	T T
8	8_19548983	0	19548983	C C	C C	T T	C C	C C	T C	T C	T C	T C	T C	T C	T C	T C	C C	T T	T C	T C	C C	C C	C C	C C	T C	T C	C C	T C	C C	T C	T C	C C	T C	C C	T C
8	8_19551216	0	19551216	C C	C C	T T	C C	C C	T C	T C	C C	T C	T C	T C	T C	T C	C C	T C	C C	T C	C C	C C	C C	C C	T C	T C	C C	T C	C C	C C	C C	C C	T C	C C	T C
8	8_19561037	0	19561037	A A	A A	G G	G G	A G	A G	G G	A G	G G	G G	G G	G G	A G	G G	G G	G G	A G	A G	A G	A G	A A	A G	G G	A G	G G	G G	G G	G G	A G	A G	A G	G G
8	8_19577480	0	19577480	G G	G G	G G	A A	A G	G G	G G	A A	A G	G G	G G	A G	G G	A A	A G	A A	G G	A A	A G	A A	G G	G G	A G	G G	A G	A A	A A	A A	A G	G G	A G	A G
8	8_19590810	0	19590810	C C	C C	C C	T C	T C	C C	C C	C C	T C	C C	C C	T C	C C	C C	C C	C C	C C	T C	T C	T C	C C	C C	T C	C C	T C	T C	C C	T C	T C	C C	T C	T C
8	8_19615146	0	19615146	G T	G T	G T	G T	G G	G T	T T	G T	G T	T T	G T	G G	G T	G T	T T	G G	G T	G G	T T	G T	G T	G T	G G	T T	T T	T T	G G	G T	T T	T T	G G	G T
8	8_19666770	0	19666770	T T	T C	T T	T C	T C	T C	C C	T C	T T	C C	T C	T C	T C	T T	T C	T T	T C	T C	T C	T C	T C	C C	T C	C C	T C	T T	T C	T C	T C	C C	T C	C C
8	8_19685736	0	19685736	C C	C C	C C	T C	T C	C C	C C	C C	C C	C C	C C	T C	C C	C C	C C	C C	C C	T C	C C	C C	C C	C C	T C	C C	C C	T C	C C	T C	C C	C C	T C	T C
8	8_19686067	0	19686067	T T	T T	T T	G T	G T	T T	T T	T T	T T	T T	T T	G T	T T	T T	T T	T T	T T	G T	T T	T T	T T	T T	G T	T T	T T	G T	T T	G T	T T	T T	G T	G T
8	8_19696725	0	19696725	G G	G G	G G	A G	A G	G G	G G	G G	G G	G G	G G	A G	G G	G G	G G	G G	G G	A G	G G	G G	G G	G G	A G	G G	G G	A G	G G	A G	G G	G G	A G	A G
8	8_19745611	0	19745611	G A	G A	A A	G A	A A	A A	G A	G G	G G	G A	G A	A A	A A	G A	A A	G A	G A	A A	G G	G G	G A	G A	G A	G G	G G	G A	A A	G A	G G	G G	A A	A A
8	8_19758042	0	19758042	A G	G G	G G	A G	A G	G G	G G	A G	G G	G G	G G	A G	G G	G G	G G	G G	A G	A G	G G	A G	G G	G G	A G	A G	G G	A G	G G	A G	G G	G G	A G	A G
8	8_19854561	0	19854561	A A	A A	A A	A A	A A	A A	A A	A A	A A	A A	A A	A A	A A	A A	A A	G A	A A	A A	A A	A A	A A	A A	A A	A A	A A	A A	A A	A A	A A	A A	A A	A A
8	8_19932644	0	19932644	C T	T T	T T	C T	C T	C T	T T	T T	T T	T T	T T	C T	T T	T T	C T	T T	T T	C T	T T	T T	T T	T T	C T	T T	T T	C T	T T	C T	T T	T T	C T	C C
8	8_20008951	0	20008951	T T	T T	T T	T T	T T	T T	T T	C T	C C	T T	T T	T T	T T	T T	T T	C T	C T	T T	T T	C C	C T	T T	C T	C T	C T	C T	T T	T T	C C	T T	T T	T T
8	8_20105070	0	20105070	G G	G G	G G	A G	A G	A G	G G	A G	G G	G G	G G	A G	G G	G G	A G	G G	G G	A G	G G	G G	G G	A G	A G	G G	G G	A G	G G	A A	G G	G G	A G	A A
8	8_20108611	0	20108611	T T	T T	T T	C T	C T	C T	T T	C T	T T	T T	T T	C T	T T	T T	C T	T T	T T	C T	T T	T T	T T	C T	C T	T T	T T	C T	T T	C C	T T	T T	C T	C C
8	8_20110658	0	20110658	C C	C C	C C	T C	T C	T C	C C	T C	C C	C C	C C	T C	C C	C C	T C	C C	C C	T C	C C	C C	C C	T C	T C	C C	C C	T C	C C	T T	C C	C C	T C	T T
8	8_20116441	0	20116441	G A	A A	A A	G A	G A	G A	A A	G A	A A	A A	A A	G A	A A	A A	G A	A A	A A	G A	A A	A A	A A	G A	G A	A A	A A	G A	A A	G G	A A	A A	G A	G G
8	8_20144809	0	20144809	A G	G G	G G	A G	A G	A G	G G	A G	G G	G G	G G	A G	G G	G G	A G	G G	G G	A G	G G	G G	G G	A G	A G	G G	G G	A G	G G	A A	G G	G G	A G	A A
8	8_20154474	0	20154474	C T	T T	T T	C T	C T	C T	T T	C C	C C	T T	T T	C T	T T	T T	C T	C T	C T	C T	T T	C C	C T	C T	C C	C T	C T	C C	T T	C C	C C	T T	C T	C C
8	8_20268687	0	20268687	G G	G G	G G	G G	G G	G G	G G	A G	A A	G G	G G	G G	G G	G G	G G	G G	A G	G G	G G	A A	A G	G G	A G	A G	A G	A G	G G	G G	A A	G G	G G	G G
8	8_20315897	0	20315897	T T	T C	T T	T C	T T	T T	T C	C C	C C	T C	C C	T C	T T	T C	T T	T C	C C	T T	T C	C C	T C	T C	T C	C C	C C	T C	T T	T C	C C	C C	T T	T T
8	8_20361667	0	20361667	0 0	T C	T C	T C	T C	T C	T C	T C	C C	T C	T C	T C	T C	T C	T C	T C	T C	T C	T C	C C	T C	T C	T C	T C	T C	T C	T C	T C	C C	T T	T C	T C
8	8_20362915	0	20362915	A G	A G	A G	A G	A G	A G	A G	A G	G G	A G	G G	A G	A G	A G	A G	A G	G G	A G	A G	G G	A G	A G	A G	G G	G G	A G	A G	A G	G G	G G	A G	0 0
8	8_20493926	0	20493926	C C	T C	C C	T T	T C	T C	C C	C C	C C	C C	T C	T T	C C	T C	T C	C C	T C	T C	T C	C C	C C	C C	T C	C C	T C	T C	C C	T C	C C	T T	T C	T T
8	8_20510974	0	20510974	G G	G G	G G	G G	G G	G G	G G	A G	A A	G G	G G	G G	G G	G G	G G	G G	A G	G G	G G	A A	A G	G G	A G	A G	A G	A G	G G	G G	A A	G G	G G	G G
8	8_20557670	0	20557670	A A	A A	A A	G A	G A	A A	A A	A A	A A	A A	A A	G A	A A	A A	A A	A A	A A	G A	A A	A A	A A	A A	G A	A A	A A	G A	A A	G A	A A	A A	G A	G A
8	8_20584528	0	20584528	T T	T T	T T	C T	C T	T T	T T	T T	T T	T T	T T	C T	T T	T T	T T	T T	T T	C T	T T	T T	T T	T T	C T	T T	T T	C T	T T	C T	T T	T T	C T	C T
8	8_20660286	0	20660286	G G	A G	G G	A G	G G	A G	G G	G G	G G	G G	A G	A G	G G	A G	A G	G G	A G	G G	A G	G G	G G	G G	G G	G G	A G	G G	G G	G G	G G	A A	G G	A G
8	8_20671852	0	20671852	A A	A A	A A	A A	A A	A A	A A	C A	C C	A A	A A	A A	A A	A A	A A	A A	C A	A A	A A	C C	C A	A A	C A	C A	C A	C A	A A	A A	C C	A A	A A	A A
8	8_20798467	0	20798467	C C	C C	C C	T C	T C	C C	T C	C C	C C	T C	C C	T C	T C	C C	T C	C C	C C	T C	C C	C C	C C	T C	T C	C C	C C	T C	C C	T C	C C	C C	T C	T C
8	8_20831689	0	20831689	A G	A A	A G	G G	A G	A A	A G	A G	A A	A G	A G	G G	A G	G G	A G	G G	A G	G G	G G	A A	A A	G G	A G	A A	A G	A G	A G	G G	A A	G G	A G	A G
8	8_20846666	0	20846666	C A	A A	A A	C A	C A	A A	C A	A A	A A	C A	C A	C C	C A	A A	A A	C A	C A	C A	A A	A A	A A	A A	C A	A A	A A	C A	C A	C A	A A	A A	C A	C A
8	8_20846948	0	20846948	T T	T T	T T	C T	C T	T T	C T	T T	T T	C T	C T	C C	C T	T T	T T	C T	C T	C C	T T	T T	T T	T T	C T	T T	T T	C T	T T	C T	T T	T T	C T	C T
8	8_20849134	0	20849134	G G	G G	A G	G G	G G	G G	G G	A A	G G	G G	G G	G G	A G	G G	A G	G G	A G	G G	G G	G G	G G	A G	G G	A G	A G	G G	G G	G G	G G	A G	G G	G G
8	8_20849456	0	20849456	T T	T T	T T	G T	G T	T T	T T	T T	T T	T T	G T	G G	T T	T T	T T	G T	G T	G G	T T	T T	T T	T T	G T	T T	T T	G T	T T	G T	T T	T T	G T	G T
8	8_20923097	0	20923097	G G	G G	G G	A G	G G	G G	A G	G G	G G	A G	A A	A G	G G	A G	G G	G G	A G	G G	A A	G G	G G	G G	G G	A G	G G	G G	G G	G G	G G	A G	G G	G G
8	8_20943110	0	20943110	C C	C C	0 0	C C	C C	C C	C C	T T	C C	C C	C C	C C	T C	C C	T C	C C	T C	C C	C C	C C	C C	T C	C C	T C	T C	C C	C C	C C	C C	T C	C C	C C
8	8_20947045	0	20947045	T T	T T	G T	T T	T T	G T	G T	G G	T T	G T	G T	G T	G G	T T	G G	T T	G G	T T	T T	T T	T T	G T	T T	G T	G T	T T	T T	T T	T T	G T	T T	G T
8	8_21048394	0	21048394	T T	C T	C T	C T	C T	T T	T T	C C	T T	T T	T T	C T	C T	C T	T T	C T	C T	C T	T T	T T	T T	T T	C T	C T	C T	T T	C T	C T	T T	C T	C T	C T
8	8_21130284	0	21130284	C C	C C	A C	A A	A C	C C	C C	A A	C C	C C	C C	A C	A C	A A	C C	A C	A C	A C	C C	C C	C C	C C	A C	A C	A C	C C	A C	A C	C C	A C	A C	A C
8	8_21136750	0	21136750	T C	C C	C C	C C	C C	C C	C C	C C	C C	C C	C C	C C	C C	C C	C C	C C	C C	C C	C C	T C	C C	C C	C C	C C	C C	T C	C C	T C	C C	C C	C C	C C
8	8_21156649	0	21156649	C C	C C	C C	C C	C C	C C	T C	C C	C C	T C	T C	C C	C C	C C	C C	C C	C C	C C	T T	C C	C C	C C	C C	T C	C C	C C	C C	C C	C C	T C	C C	C C
8	8_21174529	0	21174529	T T	T G	T T	T T	T T	T G	G G	T T	G G	G G	G G	T G	T G	T T	G G	T G	T G	T G	G G	T G	T G	G G	T G	T G	T G	T G	T T	T T	G G	T G	T T	T G
8	8_21211062	0	21211062	A G	G G	A G	A A	A G	G G	G G	A A	G G	G G	G G	A G	A G	A A	G G	A G	A G	A G	G G	G G	G G	G G	A G	A G	A G	A G	A G	A G	G G	A G	A G	A G
8	8_21213027	0	21213027	T T	0 0	0 0	T T	T T	T T	T T	T T	T T	T T	T T	T T	T T	T T	T T	T T	T T	T T	T T	T T	T T	T T	T T	T T	T T	T T	T T	T T	T T	T T	T T	T T
8	8_21272836	0	21272836	G G	G G	G G	G G	G G	G G	G G	G G	G G	G G	G G	G G	G G	A G	G G	A G	G G	G G	G G	G G	G G	G G	G G	G G	A G	A G	A G	G G	G G	A G	G G	G G
8	8_21328080	0	21328080	G G	G G	G G	G G	G G	G G	G G	G G	G G	G G	G G	G G	G G	T G	G G	T G	G G	G G	G G	G G	G G	G G	G G	G G	T G	T G	T G	G G	G G	T G	G G	G G
8	8_21418884	0	21418884	A A	A A	G A	G G	G A	A A	A A	G G	A A	A A	A A	G A	G A	G A	A A	A A	G A	G A	A A	A A	A A	G A	G A	G A	A A	A A	A A	G A	A A	A A	G A	G A
8	8_21430992	0	21430992	G G	G G	G G	G G	G G	G G	G G	G G	G G	G G	G G	G G	G G	A G	G G	A G	G G	G G	G G	G G	G G	G G	G G	G G	A G	A G	A G	G G	G G	A G	G G	G G
8	8_21474716	0	21474716	A A	A A	A A	A A	A A	A A	G A	A A	A A	G A	A A	A A	G A	A A	G A	G A	A A	A A	A A	A A	A A	A A	A A	A A	A A	A A	A A	A A	A A	A A	A A	A A
8	8_21483196	0	21483196	T T	T T	C T	C C	C T	T T	T T	C C	T T	T T	T T	C T	C T	C T	T T	T T	C T	C T	T T	T T	T T	C T	C T	C T	T T	T T	T T	C T	T T	T T	C T	C T
8	8_21483539	0	21483539	C C	C C	C C	C C	C C	C C	T C	C C	T T	T C	T C	C C	C C	C C	C C	C C	C C	C C	T T	T C	T C	C C	T C	T C	T C	T C	C C	C C	T T	T C	C C	C C
8	8_21489468	0	21489468	C T	T T	T T	T T	T T	C T	C T	T T	C C	C T	C C	C T	T T	C T	C T	C T	C T	C T	C C	C T	C T	C T	C T	C T	C C	C C	C T	T T	C C	C C	T T	C T
8	8_21552985	0	21552985	G G	G G	A G	A G	G G	G G	A G	A A	G G	A G	G G	G G	A A	A G	A G	A G	A G	G G	G G	A G	G G	A G	G G	A G	G G	G G	G G	A G	G G	G G	G G	G G
8	8_21563724	0	21563724	A G	A G	A G	A G	A A	A G	A G	G G	G G	A G	G G	A G	A G	A G	A G	A G	G G	A G	G G	A G	A G	A G	A G	G G	A G	A G	A A	A A	G G	A G	A A	A G
8	8_21564422	0	21564422	C C	C C	C C	T C	T C	C C	T C	C C	C C	T C	C C	T C	T C	T C	C C	T C	C C	T C	C C	T C	C C	C C	T C	C C	T C	T C	T C	T T	C C	T C	T C	T C
8	8_21609775	0	21609775	A A	A A	G A	G A	A A	A A	A A	G G	A A	A A	A A	A A	G A	G A	A A	A A	G A	A A	A A	A A	A A	A A	A A	G A	A A	A A	A A	A A	A A	A A	A A	A A
8	8_21667174	0	21667174	A A	A A	A A	C A	C A	A A	C A	A A	A A	C A	C A	C C	C A	C A	C A	C A	C A	C A	A A	C A	A A	C A	C A	A A	C A	C A	C A	C C	A A	C A	C A	C A
8	8_21695072	0	21695072	G G	G G	T G	T G	G G	G G	G G	T T	G G	G G	G G	G G	T G	T G	G G	G G	T G	G G	G G	G G	G G	T G	G G	T G	G G	G G	G G	G G	G G	G G	G G	G G
8	8_21743908	0	21743908	T C	T C	T C	T C	C C	T C	C C	T T	C C	C C	T C	T C	T C	T C	T C	C C	T T	C C	C C	C C	C C	T C	C C	T C	C C	C C	C C	C C	C C	C C	C C	T C
8	8_21804694	0	21804694	G G	G G	G G	A G	A G	G G	A G	G G	G G	A G	G G	A G	A G	A G	G G	A G	G G	A G	G G	A G	G G	G G	A G	G G	A G	A G	A G	A A	G G	A G	A G	A G
8	8_21877750	0	21877750	C C	C C	T C	T T	T C	C C	C C	T T	T T	C C	C C	T C	T C	T T	C C	T C	T C	T T	C C	T C	T C	C C	T T	T C	T C	T T	T C	T C	T T	C C	T C	T C
8	8_21878112	0	21878112	C C	C C	T C	T T	T C	C C	C C	T T	T T	C C	C C	T C	T C	T T	C C	T C	T C	T T	C C	T C	T C	C C	T T	T C	T C	T T	T C	T C	T T	C C	T C	T C
8	8_21896311	0	21896311	C C	C C	C C	C C	C C	C C	C C	C C	C C	C C	C C	C C	C C	C C	C C	C C	C C	C C	C C	C C	C C	C C	C C	C C	T C	C C	C C	C C	C C	T C	C C	C C
8	8_21978494	0	21978494	A A	A A	G A	G A	A A	A A	A A	G G	A A	A A	G A	G A	G A	G A	A A	A A	G G	A A	A A	A A	A A	G A	A A	G A	G A	A A	A A	A A	A A	G A	A A	A A
8	8_22009575	0	22009575	G G	G G	G G	A G	G G	G G	G G	G G	G G	G G	G G	A G	G G	A G	G G	A G	G G	A G	G G	G G	G G	A G	A G	G G	G G	A G	A G	A G	G G	G G	G G	A G
8	8_22040269	0	22040269	T C	T C	C C	C C	C C	C C	C C	C C	T T	C C	C C	C C	C C	C C	C C	T C	C C	C C	C C	T C	T C	C C	T C	C C	T T	T C	C C	C C	T T	T C	C C	C C
8	8_22084342	0	22084342	G G	G G	G G	G G	G G	G G	A G	G G	G G	A G	A G	G G	G G	G G	G G	G G	G G	G G	A A	G G	G G	G G	G G	A G	G G	G G	G G	G G	G G	A G	G G	G G
8	8_22084533	0	22084533	G G	G G	G G	G G	G G	G G	A G	G G	G G	A G	A G	G G	G G	G G	G G	G G	G G	G G	A A	G G	G G	G G	G G	A G	G G	G G	G G	G G	G G	A G	G G	G G
8	8_22109142	0	22109142	T T	T T	G T	G T	T T	T T	T T	G G	T T	T T	G T	G T	G T	G T	T T	T T	G G	T T	T T	T T	T T	T T	T T	G T	T T	T T	T T	T T	T T	T T	T T	T T
8	8_22112785	0	22112785	C C	C C	C C	T C	C C	C C	T C	C C	C C	T C	C C	T C	T C	T C	C C	T C	C C	T C	C C	C C	C C	T C	T C	C C	C C	T C	T C	T C	C C	C C	C C	T C
8	8_22113249	0	22113249	G G	G G	G G	G G	G G	G G	G G	G G	T T	G G	G G	G G	G G	G G	T G	G G	G G	G G	G G	T T	T G	G G	T G	G G	T T	T G	G G	T G	T T	T G	G G	G G
8	8_22171249	0	22171249	G G	G G	T G	T G	G G	G G	G G	T T	G G	G G	G G	G G	T G	T T	G G	T G	T G	G G	G G	G G	G G	G G	G G	T G	G G	G G	T G	G G	G G	G G	G G	G G
8	8_22178476	0	22178476	T C	T T	T C	C C	T T	T C	C C	C C	C C	C C	C C	C C	C C	C C	T C	C C	C C	T C	C C	T C	T C	T C	C C	C C	T C	C C	T C	T C	C C	T C	T T	C C
8	8_22211267	0	22211267	G G	G G	G G	T G	G G	G G	T T	G G	T T	T T	T G	T G	T G	G G	G G	G G	G G	T G	T T	T G	T G	T G	T T	T G	T G	T T	G G	T G	T T	T G	G G	T G
8	8_22262824	0	22262824	A A	C A	C A	C A	A A	C A	C A	C C	A A	C A	C C	C A	C A	C C	C C	C C	C C	A A	C C	A A	A A	A A	A A	C C	C A	A A	C A	A A	A A	C C	A A	C A
8	8_22304743	0	22304743	C C	C C	T C	T C	C C	T C	C C	T T	C C	C C	C C	C C	T C	T T	T C	T C	T C	C C	C C	C C	C C	C C	C C	T C	C C	C C	T C	C C	C C	C C	C C	T C
8	8_22315466	0	22315466	C C	C C	T C	T C	C C	C C	C C	T T	C C	C C	C C	C C	T C	T T	C C	T C	T C	C C	C C	C C	C C	C C	C C	T C	C C	C C	T C	C C	C C	C C	C C	C C
8	8_22397206	0	22397206	G G	A G	A G	A G	G G	G G	A G	A A	G G	A G	A G	G G	A G	A A	G G	A G	A G	G G	A A	G G	G G	G G	G G	A A	G G	G G	A G	G G	G G	A G	G G	G G
8	8_22397569	0	22397569	A A	A A	A A	G A	A A	A A	G A	A A	G G	G A	G A	G G	G A	A A	G A	G A	G A	G A	A A	G G	G A	G A	G G	A A	G G	G G	A A	G G	G G	G A	A A	G A
8	8_22425012	0	22425012	G A	A A	A A	A A	A A	A A	A A	A A	A A	A A	A A	A A	A A	A A	A A	A A	A A	A A	A A	A A	A A	A A	A A	A A	A A	A A	A A	A A	A A	A A	A A	A A
8	8_22431692	0	22431692	G G	A G	A G	A G	G G	G G	A G	A A	G G	A G	A G	G G	A G	A A	G G	A G	A G	G G	A A	G G	G G	G G	G G	A A	G G	G G	A G	G G	G G	A G	G G	G G
8	8_22432121	0	22432121	C A	A A	A A	C A	A A	A A	C A	A A	C C	C A	C A	C C	C A	A A	C A	C A	C A	C A	A A	C C	C A	C A	C C	A A	C C	C C	A A	C C	C C	C A	A A	C A
8	8_22447539	0	22447539	T C	T T	T T	T C	T T	T C	T C	T T	C C	T C	T C	C C	T C	T T	C C	T C	T C	C C	T T	C C	T C	T C	C C	T T	C C	C C	T T	C C	C C	T C	T T	C C
8	8_22510921	0	22510921	T C	C C	C C	T C	C C	C C	T C	C C	T T	T C	T C	T T	T C	C C	C C	T C	T C	T C	C C	T C	T C	T C	T T	C C	T C	T T	C C	T C	T T	C C	C C	T C
8	8_22567894	0	22567894	C C	T C	T C	T C	C C	C C	C C	T T	C C	C C	C C	C C	T C	T T	C C	T C	T C	C C	C C	C C	C C	C C	C C	T C	C C	C C	T C	C C	C C	C C	C C	C C
8	8_22640886	0	22640886	T T	C T	C T	C T	T T	C T	T T	C C	T T	T T	T T	T T	C T	C C	C T	C T	C T	C T	T T	T T	T T	T T	T T	C T	T T	T T	C T	T T	T T	T T	T T	C T
8	8_22647067	0	22647067	A A	A A	A A	A A	A A	A A	A A	A A	A A	A A	A A	A A	A A	A A	C A	A A	A A	A A	A A	C A	A A	A A	A A	A A	C A	A A	A A	C A	A A	C A	A A	A A
8	8_22689673	0	22689673	C C	T C	T C	T C	C C	C C	C C	T T	C C	C C	C C	C C	T C	T T	C C	T C	T C	C C	C C	C C	C C	C C	C C	T C	C C	C C	T C	C C	C C	C C	C C	C C
8	8_22749703	0	22749703	G A	G G	G G	G A	G G	G G	A A	G G	A A	A A	A A	A A	G A	G G	G G	G A	G A	G A	A A	G A	G A	G A	A A	G A	G A	A A	G G	G A	A A	G A	G G	G A
8	8_22771118	0	22771118	G G	A G	A G	A G	G G	G G	G G	A A	G G	G G	G G	G G	A G	A A	G G	A G	A G	G G	G G	G G	G G	G G	G G	A G	G G	G G	A G	G G	G G	G G	G G	G G
8	8_22798237	0	22798237	A A	G A	G A	G A	A A	A A	A A	G G	A A	A A	A A	A A	G A	G G	A A	G A	G A	A A	A A	A A	A A	A A	A A	G A	A A	A A	G A	A A	A A	A A	A A	A A
8	8_22827018	0	22827018	A A	C A	C A	C A	A A	A A	A A	C C	A A	A A	A A	A A	C A	C C	A A	C A	C A	A A	A A	A A	A A	A A	A A	C A	A A	A A	C A	A A	A A	A A	A A	A A
8	8_22843261	0	22843261	C C	C C	C C	C C	C C	T C	T C	C C	C C	T C	C C	C C	T C	C C	T T	C C	C C	C C	C C	T C	C C	C C	C C	C C	T C	C C	C C	T C	C C	T C	C C	T C
8	8_22868643	0	22868643	G G	G G	G G	G G	G G	G G	A G	G G	G G	A G	G G	G G	A G	G G	A G	G G	G G	G G	G G	A G	G G	G G	G G	G G	A G	G G	G G	A G	G G	A G	G G	G G
8	8_22949170	0	22949170	C T	C T	C T	T T	C C	C C	C T	T T	T T	C T	T T	T T	C T	T T	C C	T T	T T	C T	T T	C T	C T	C T	T T	T T	C T	T T	C T	C T	T T	C T	C C	C T
8	8_22958962	0	22958962	A G	A G	A G	G G	A A	A A	A G	G G	G G	A G	G G	G G	A G	G G	A A	G G	G G	A G	G G	A G	A G	A G	G G	G G	A G	G G	A G	A G	G G	A G	A A	A G
8	8_23062533	0	23062533	C C	T C	T C	T C	C C	C C	T C	T T	C C	T C	T C	C C	T C	T T	C C	T C	T C	C C	T T	C C	C C	C C	C C	T T	C C	C C	T C	C C	C C	T C	C C	C C
8	8_23097090	0	23097090	T C	T T	T T	T C	T T	T C	T C	T T	C C	T C	T C	C C	T C	T T	C C	T C	T C	C C	T T	C C	T C	T C	C C	T T	C C	C C	T T	C C	C C	T C	T T	C C
8	8_23153876	0	23153876	A A	A A	A A	C A	A A	C A	A A	A A	C A	A A	A A	C A	A A	A A	C A	C A	A A	C A	A A	C A	C A	C A	C C	A A	C A	C A	A A	C A	C C	A A	A A	C C
8	8_23247931	0	23247931	C C	C C	C C	C C	C C	T C	C C	C C	T C	C C	C C	C C	C C	C C	T C	C C	C C	T C	C C	C C	C C	C C	C C	C C	C C	T C	C C	C C	C C	C C	C C	T C
8	8_23251957	0	23251957	G G	G G	G G	G G	G G	A G	G G	G G	A G	G G	G G	G G	G G	G G	A G	G G	G G	A G	G G	G G	G G	G G	G G	G G	G G	A G	G G	G G	G G	G G	G G	A G
8	8_23252071	0	23252071	A A	A A	A A	A A	A A	G A	A A	A A	G A	A A	A A	A A	A A	A A	G A	A A	A A	G A	A A	A A	A A	A A	A A	A A	A A	G A	A A	A A	A A	A A	A A	G A
8	8_23290596	0	23290596	A A	A A	G A	G A	A A	A A	G A	G G	A A	G A	G A	A A	G A	G G	A A	G A	G A	A A	G G	A A	A A	A A	A A	G G	A A	A A	G A	A A	A A	G A	A A	A A
8	8_23358661	0	23358661	G G	G G	A G	A G	G G	G G	G G	A A	G G	G G	G G	G G	A G	A A	G G	A G	A G	G G	G G	G G	G G	G G	G G	A G	G G	G G	A G	G G	G G	G G	G G	G G
8	8_23358706	0	23358706	G G	G G	G G	G G	G G	G G	G G	G G	A G	G G	G G	G G	G G	G G	G G	A G	G G	G G	G G	G G	G G	G G	G G	G G	G G	A G	G G	G G	G G	G G	G G	G G
8	8_23442462	0	23442462	T C	C C	C C	C C	C C	C C	T C	C C	C C	T C	T C	C C	C C	C C	C C	C C	C C	C C	T T	C C	C C	C C	C C	T C	C C	C C	C C	C C	C C	T C	C C	C C
8	8_23472519	0	23472519	C C	C C	T C	T T	C C	C C	C C	T T	C C	C C	C C	T C	T C	T T	T C	T C	T C	T C	C C	C C	C C	T C	T C	T C	C C	T C	T C	T C	C C	C C	C C	T C
8	8_23544857	0	23544857	G A	A A	A A	A A	A A	A A	G A	A A	A A	G A	G A	G A	G A	A A	A A	G A	G A	A A	A A	A A	A A	A A	A A	A A	A A	A A	A A	A A	A A	A A	A A	A A
8	8_23606568	0	23606568	G T	G T	T T	T T	T T	T T	G T	G G	T T	G T	G T	G T	G G	G T	T T	G G	G G	T T	T T	G T	G T	T T	T T	G T	G T	T T	G T	T T	G G	T T	T T	T T
8	8_23609563	0	23609563	G A	G A	G A	A A	G G	G A	A A	A A	G A	A A	A A	A A	A A	A A	A A	A A	A A	A A	A A	A A	G A	G A	G A	A A	A A	A A	G A	A A	A A	A A	G G	A A
8	8_23619961	0	23619961	T T	T T	T T	T T	T T	T T	T T	C C	T T	T T	T T	T T	C T	C T	T T	C T	C T	T T	T T	T T	T T	T T	T T	C T	C T	T T	C T	T T	T T	C T	T T	T T
8	8_23690242	0	23690242	C T	C T	C T	T T	C C	C T	C T	C C	C T	C T	C T	T T	C T	C T	T T	C T	C T	C T	C C	T T	C T	C T	C T	C C	T T	T T	C C	T T	T T	C T	C C	T T
8	8_23699131	0	23699131	C T	C T	T T	T T	T T	C T	C T	T T	C T	C T	C T	C T	C T	T T	C C	T T	C T	T T	T T	C T	C T	T T	T T	T T	C T	C T	T T	T T	C C	T T	T T	C T
8	8_23719695	0	23719695	T T	T T	C T	C C	T T	C T	C T	T T	C T	C T	T T	C T	C T	C T	C C	C T	T T	C T	T T	C T	C T	C T	C T	T T	C C	C C	T T	C T	C C	C T	T T	C C
8	8_23804554	0	23804554	C C	C C	T C	T T	C C	C C	C C	C C	C C	C C	C C	T C	C C	T C	C C	C C	C C	T C	C C	C C	C C	T C	T C	C C	C C	T C	C C	T C	C C	C C	C C	T C
8	8_23820173	0	23820173	T T	T T	C T	C C	T T	T T	T T	T T	T T	T T	T T	C T	T T	C T	T T	T T	T T	C T	T T	T T	T T	C T	C T	T T	T T	C T	T T	C T	T T	T T	T T	C T
8	8_23820406	0	23820406	A A	A A	G A	G G	A A	A A	A A	A A	A A	A A	A A	G A	A A	G A	A A	A A	A A	G A	A A	A A	A A	G A	G A	A A	A A	G A	A A	G A	A A	A A	A A	G A
8	8_23870426	0	23870426	A A	G A	G A	G G	A A	A A	A A	A A	G A	A A	A A	G A	A A	G A	G A	G A	A A	G A	A A	A A	A A	G A	G A	A A	A A	G G	A A	G A	A A	A A	A A	G A
8	8_23888384	0	23888384	G G	G G	G G	G G	G G	G G	G G	G G	G G	G G	G G	G G	G G	G G	A G	G G	G G	G G	G G	G G	G G	G G	G G	G G	G G	G G	G G	G G	G G	G G	G G	G G
8	8_23904572	0	23904572	T C	T C	T C	C C	T T	T C	T T	C C	T C	T T	T C	C C	T C	C C	C C	C C	C C	T C	T T	T C	T C	T C	T C	T C	C C	C C	T C	T C	C C	T C	T T	C C
8	8_24068247	0	24068247	G G	G G	G G	G G	G G	G G	A G	A A	G G	A G	G G	G G	A A	A G	A G	A G	A A	G G	G G	G G	G G	A G	G G	A G	A G	A G	A G	G G	G G	A G	G G	G G
8	8_24182748	0	24182748	C C	C C	C C	C C	C C	C C	C C	T T	C C	C C	C C	C C	T T	T C	C C	T T	T C	C C	C C	C C	C C	T C	C C	T C	C C	T C	T C	C C	C C	C C	C C	C C
8	8_24188533	0	24188533	G G	G G	G G	G G	G G	G G	G G	A A	G G	G G	G G	G G	A G	A G	G G	A G	A G	G G	G G	G G	G G	A G	G G	A G	G G	A G	A G	G G	G G	G G	G G	G G
8	8_24265012	0	24265012	T C	C C	C C	C C	C C	C C	T C	C C	C C	T C	T C	T C	T C	T C	C C	T T	T C	C C	C C	C C	C C	T C	C C	C C	T C	T C	T C	C C	C C	T C	C C	C C
8	8_24290294	0	24290294	C C	C C	C C	C C	C C	C C	T C	C C	C C	T C	C C	C C	T C	T C	C C	T T	C C	C C	C C	C C	C C	T C	C C	C C	C C	T C	T C	C C	C C	C C	C C	C C
8	8_24338079	0	24338079	C T	T T	T T	T T	T T	T T	C T	T T	T T	C T	C T	C T	C T	C T	T T	C C	C T	T T	T T	T T	T T	C T	T T	T T	C T	C T	C T	T T	T T	C T	T T	T T
8	8_24411688	0	24411688	C C	C C	C C	C C	C C	C C	C C	C C	C C	C C	C C	C C	C C	T C	C C	T C	C C	C C	C C	C C	C C	C C	C C	C C	C C	T C	T C	C C	C C	C C	C C	C C
8	8_24440872	0	24440872	T C	T T	T C	C C	T T	T C	T C	T C	T C	T C	T C	C C	C C	C C	C C	T C	C C	T C	T T	T C	T C	T T	T C	T C	C C	C C	T C	T C	C C	T C	T T	C C
8	8_24528856	0	24528856	G G	G G	G G	G G	G G	G G	G G	G G	G G	G G	G G	G G	G G	A G	G G	A G	G G	G G	G G	G G	G G	G G	G G	G G	G G	A G	A G	G G	G G	G G	G G	G G
8	8_24575032	0	24575032	A A	A A	A A	A A	A A	G A	A A	A A	A A	A A	A A	A A	A A	A A	G A	A A	A A	A A	A A	A A	A A	G A	A A	A A	G A	A A	A A	A A	A A	G A	A A	G A
8	8_24610448	0	24610448	A C	A C	A A	A C	A C	A C	A C	A C	A C	A C	A C	C C	C C	A C	A C	C C	C C	C C	A A	A C	C C	C C	A C	A C	C C	C C	A C	A C	C C	A C	A A	C C
8	8_24618569	0	24618569	G G	G G	G G	A G	G G	G G	G G	A G	G G	G G	G G	A G	A G	A G	G G	A G	A G	A A	G G	G G	G G	A G	A G	A G	G G	A G	A G	A G	G G	G G	G G	A G
8	8_24622895	0	24622895	C C	C C	C C	T C	C C	C C	C C	T C	C C	C C	C C	T C	T C	T C	C C	T C	T C	T T	C C	C C	C C	T C	T C	T C	C C	T C	T C	T C	C C	C C	C C	T C
8	8_24629097	0	24629097	A A	A A	A A	G A	A A	A A	A A	G A	A A	A A	A A	G A	G A	G A	A A	G A	G A	G G	A A	A A	A A	G A	G A	G A	A A	G A	G A	G A	A A	A A	A A	G A
8	8_24639666	0	24639666	G G	G G	G G	A G	G G	G G	G G	A G	G G	G G	G G	A G	A G	A G	G G	A G	A G	A G	G G	G G	G G	A G	A G	A G	G G	A G	A G	A G	G G	G G	G G	A G
8	8_24659562	0	24659562	G G	G G	G G	A G	G G	G G	G G	A G	G G	G G	G G	A G	A G	A G	G G	A G	A G	A G	G G	G G	G G	A G	A G	A G	G G	A G	A G	A G	G G	G G	G G	A G
8	8_24686529	0	24686529	A A	G A	G A	G G	G A	G A	A A	G A	A A	A A	G A	G G	G A	G G	G A	G G	G G	G G	A A	A A	G A	G A	G A	G A	G A	G A	G A	G A	A A	G A	A A	G G
8	8_24694961	0	24694961	G G	G G	G G	G G	G G	G G	G G	G G	G G	G G	G G	G G	G G	G G	A G	G G	G G	G G	G G	G G	G G	G G	G G	G G	G G	G G	G G	G G	G G	G G	G G	G G
8	8_24749939	0	24749939	T T	C T	T T	T T	C T	T T	T T	T T	T T	T T	T T	T T	T T	T T	T T	C T	T T	T T	T T	T T	C T	T T	T T	T T	T T	T T	T T	T T	T T	T T	T T	T T
8	8_24760430	0	24760430	C C	C C	C C	C C	C C	A C	C C	C C	C C	C C	A C	A C	C C	C C	A A	C C	A C	C C	C C	C C	C C	A C	C C	C C	A C	C C	C C	C C	C C	A C	C C	A C
8	8_24826432	0	24826432	T G	T G	T G	G G	T G	T T	T G	T G	T G	T G	T T	T G	G G	G G	T G	G G	T G	G G	T T	T G	G G	G G	T G	T G	T G	G G	T G	T G	G G	T T	T T	T G
8	8_24898640	0	24898640	C T	C T	C T	C C	C T	T T	C T	C T	C T	C T	T T	C T	C C	C T	C T	C T	C T	C C	T T	C T	C C	C T	C T	C T	C T	C C	T T	C T	C C	T T	T T	C T
8	8_24912303	0	24912303	G A	A A	A A	A A	A A	A A	G A	A A	G A	G A	A A	A A	G A	G A	A A	G A	A A	A A	A A	G A	G A	G G	A A	A A	G A	G A	G A	A A	G G	A A	A A	A A
8	8_24977741	0	24977741	A G	A G	A G	G G	A G	A A	A G	A G	A G	A G	A A	A G	G G	G G	A G	G G	A G	G G	A A	A G	G G	G G	A G	A G	A G	G G	A G	A G	G G	A A	A A	A G
8	8_24986009	0	24986009	A A	A A	A A	G A	A A	A A	A A	G A	A A	A A	A A	G A	G A	A A	A A	A A	G A	G A	A A	A A	A A	A A	G A	G A	A A	G A	A A	G A	A A	A A	A A	G A
8	8_25040776	0	25040776	G A	G G	G G	G A	G G	G A	A A	A A	G A	A A	A A	A A	A A	G G	A A	G G	A A	A A	G G	G A	G A	A A	G A	A A	G A	A A	G G	G A	A A	G G	G G	A A
8	8_25042507	0	25042507	G G	T G	T G	T T	T G	T G	T G	T G	G G	T G	T G	T T	T T	T G	T G	G G	T T	T T	G G	G G	T G	G G	T G	T G	G G	T G	G G	T G	G G	G G	G G	T T
8	8_25105146	0	25105146	A A	C A	A A	C A	C A	C A	C A	C A	A A	C A	C A	C C	C C	A A	0 0	A A	C C	C C	A A	A A	C A	A A	C A	C A	A A	C A	A A	C A	A A	A A	A A	C C
8	8_25113182	0	25113182	C T	C T	T T	C T	C T	C T	C T	C T	T T	C T	C T	C C	C C	T T	C T	T T	C C	C C	T T	T T	C T	C T	C T	C T	T T	C T	T T	C T	T T	T T	T T	C C
8	8_25154476	0	25154476	C C	C C	C C	T C	C C	T C	C C	T C	C C	C C	T C	T T	T C	C C	T C	C C	T T	T C	C C	C C	C C	T C	T C	T C	C C	T C	C C	T C	C C	C C	C C	T T
8	8_25207057	0	25207057	C T	C C	C T	T T	C C	C T	T T	T T	C T	T T	T T	T T	T T	T T	T T	T T	T T	T T	T T	T T	C T	T T	C T	T T	T T	T T	T T	T T	T T	T T	C C	T T
8	8_25289865	0	25289865	A A	A A	A A	A A	A A	A A	A A	G A	A A	A A	A A	A A	G A	G A	A A	G G	G A	A A	G G	G A	G A	A A	A A	G A	A A	A A	G G	G A	A A	G A	A A	A A
8	8_25306013	0	25306013	G G	G G	G G	G G	G G	A G	G G	A G	G G	G G	G G	G G	A G	A G	A G	A A	A G	G G	A A	A G	A G	G G	G G	A G	G G	G G	A A	A G	G G	A G	G G	A G
8	8_25392102	0	25392102	T T	T T	C T	C C	T T	T T	C T	T T	T T	C T	C T	C C	C T	C T	T T	T T	C T	C C	T T	T T	T T	C T	C T	T T	T T	T T	T T	C T	T T	T T	T T	C T
8	8_25409644	0	25409644	G G	G G	G G	A G	G G	G G	G G	G G	G G	G G	G G	A G	G G	G G	G G	G G	G G	A G	G G	G G	G G	A A	A G	G G	G G	G G	G G	A G	G G	G G	G G	A G
8	8_25458079	0	25458079	C C	C C	T C	T T	C C	T C	C C	C C	C C	C C	T C	T T	C C	T T	T C	T C	T C	T C	C C	C C	C C	T C	T C	C C	T C	C C	T C	T C	C C	T C	C C	T T
8	8_25470512	0	25470512	G A	A A	A A	A A	A A	A A	A A	G A	G A	A A	A A	A A	G A	A A	G A	G A	G A	A A	G G	G G	G A	G A	A A	G A	G A	G A	G A	G A	G G	G A	A A	A A
8	8_25470821	0	25470821	G A	A A	G A	G G	A A	A A	A A	G A	A A	A A	A A	G A	G A	G A	A A	A A	G A	G A	A A	A A	G A	G A	G A	G A	G A	A A	A A	G A	A A	G A	A A	G A
8	8_25553819	0	25553819	C T	C T	C C	C C	C T	C T	C T	T T	C T	C T	T T	C T	C T	C T	T T	T T	T T	C C	T T	T T	T T	C T	C C	T T	T T	T T	T T	C T	T T	T T	C C	C T
8	8_25574313	0	25574313	G G	G G	G G	G G	G G	T G	G G	G G	G G	G G	G G	G G	G G	T G	T G	T T	G G	G G	T T	T G	G G	G G	G G	G G	G G	G G	T T	T G	G G	T G	G G	T G
8	8_25610635	0	25610635	C C	C C	C C	C C	C C	T C	C C	C C	C C	C C	C C	C C	C C	T C	T C	T T	C C	C C	T T	T C	C C	C C	C C	C C	C C	C C	T T	T C	C C	T C	C C	T C
8	8_25648696	0	25648696	C C	C C	C T	T T	C C	C T	C T	C C	C T	C T	C T	T T	C T	C T	T T	C T	C T	T T	T T	T T	C C	T T	C T	C C	T T	C T	C T	T T	T T	T T	C C	T T
8	8_25688337	0	25688337	G G	G G	G G	G G	G G	G G	G G	G G	G G	G G	G G	G G	G G	T G	G G	T G	G G	G G	G G	G G	G G	G G	G G	G G	G G	G G	T G	G G	G G	G G	G G	G G
8	8_25723252	0	25723252	A C	A C	A A	A A	A C	A A	A C	A C	A C	A C	A A	A A	C C	A C	A C	C C	A C	A C	C C	C C	C C	A C	A A	A C	C C	C C	C C	A C	C C	C C	A A	A A
8	8_25775630	0	25775630	G G	G G	G G	G G	G G	A G	G G	G G	G G	G G	A G	A G	G G	G G	A A	G G	A G	G G	G G	G G	G G	G G	G G	G G	G G	G G	G G	G G	G G	G G	G G	A G
8	8_25810249	0	25810249	T T	T T	T T	T T	T T	T T	T T	T T	T T	T T	T T	T T	T T	C T	T T	C T	T T	T T	T T	T T	T T	T T	T T	T T	T T	T T	C T	T T	T T	T T	T T	T T
8	8_25818376	0	25818376	T T	T T	T C	C C	T T	T C	T C	T C	T C	T C	T C	T C	T T	T C	T C	T C	T T	C C	C C	C C	T T	C C	T C	T C	T C	T C	T C	C C	C C	T C	T T	C C
8	8_25873754	0	25873754	C C	C C	C C	C C	C C	C C	C C	C C	C C	C C	C C	C C	C C	C C	C C	T C	C C	C C	T T	T C	C C	C C	C C	C C	T C	C C	T C	T C	C C	T T	C C	C C
8	8_25873759	0	25873759	G G	G G	G G	G G	G G	A G	G G	G G	A G	G G	G G	G G	G G	G G	A G	G G	G G	G G	G G	A G	G G	G G	G G	G G	A G	A G	G G	G G	A A	G G	G G	A G
8	8_25886028	0	25886028	C C	C C	C C	C C	C C	T C	C C	C C	T C	C C	C C	C C	C C	C C	T T	C C	C C	C C	C C	T C	C C	C C	C C	C C	T C	T C	C C	C C	T T	C C	C C	T C
8	8_25887838	0	25887838	G G	G G	G G	G G	G G	G G	G G	G G	G G	G G	G G	G G	G G	G G	G G	A G	G G	G G	A A	A G	G G	G G	G G	G G	A G	G G	A G	A G	G G	A A	G G	G G
8	8_25936467	0	25936467	T C	T C	T C	T C	T C	T C	C C	C C	T C	C C	C C	T C	C C	C C	C C	C C	C C	T T	C C	C C	C C	C C	T T	C C	C C	T C	C C	T C	C C	C C	T T	T C
8	8_25959337	0	25959337	C C	C C	T C	T C	C C	C C	T C	T C	C C	T C	T C	C C	C C	T T	C C	T C	C C	C C	C C	C C	C C	T C	C C	T C	C C	C C	T C	C C	C C	C C	C C	C C
8	8_25963514	0	25963514	T T	T T	T T	T T	T T	C T	T T	T T	T T	T T	T T	T T	T T	T T	C T	T T	T T	T T	T T	T T	T T	C T	T T	T T	T T	T T	T T	T T	T T	T T	T T	C T
8	8_25992062	0	25992062	C C	C C	C C	C C	C C	T C	C C	C C	C C	C C	T C	T C	C C	C C	T C	C C	T C	C C	C C	C C	C C	C C	C C	C C	C C	C C	C C	C C	C C	C C	C C	T C
8	8_26064585	0	26064585	A G	G G	G G	G G	G G	G G	G G	G G	G G	G G	G G	G G	G G	G G	G G	G G	G G	G G	G G	G G	G G	G G	G G	G G	G G	G G	G G	G G	G G	G G	G G	G G
8	8_26104381	0	26104381	G T	T T	T T	T T	T T	T T	T T	T T	T T	T T	T T	T T	T T	T T	T T	T T	T T	T T	T T	T T	T T	T T	T T	T T	T T	T T	T T	T T	T T	T T	T T	T T
8	8_26104729	0	26104729	A G	G G	G G	G G	G G	G G	G G	G G	G G	G G	G G	G G	G G	G G	G G	G G	G G	G G	G G	G G	G G	G G	G G	G G	G G	G G	G G	G G	G G	G G	G G	G G
8	8_26104747	0	26104747	A G	G G	G G	G G	G G	G G	G G	G G	G G	G G	G G	G G	G G	G G	G G	G G	G G	G G	G G	G G	G G	G G	G G	G G	G G	G G	G G	G G	G G	G G	G G	G G
8	8_26105564	0	26105564	A A	A A	G A	G A	A A	A A	A A	A A	G A	A A	A A	A A	A A	G A	G A	A A	A A	A A	A A	G A	A A	G A	A A	A A	G A	G G	A A	A A	G G	A A	A A	A A
8	8_26146825	0	26146825	T T	C T	C T	C T	C T	C T	C C	C C	C T	C C	C T	T T	C T	C T	C C	T T	T T	T T	T T	C T	C C	C T	T T	C T	C C	C C	T T	T T	C C	C T	T T	C T
8	8_26231877	0	26231877	G A	A A	A A	A A	A A	A A	A A	A A	A A	A A	A A	A A	A A	G A	A A	G A	A A	A A	A A	A A	A A	A A	A A	A A	G A	A A	G A	A A	A A	G A	A A	A A
8	8_26281216	0	26281216	A A	G A	A A	A A	G A	A A	A A	A A	A A	A A	G A	G A	G A	A A	A A	G A	G G	A A	G G	G A	G A	G A	A A	G A	A A	A A	G A	G A	A A	G A	A A	A A
8	8_26473937	0	26473937	C T	T T	C T	C C	T T	T T	C T	C C	T T	C T	C T	C T	T T	C T	T T	T T	T T	C C	T T	T T	C T	T T	C T	C T	C T	T T	T T	C T	T T	C T	T T	C T
8	8_26492929	0	26492929	G G	A G	G G	G G	A G	G G	A G	G G	G G	A G	A G	A G	A G	A G	G G	A A	A G	G G	A A	A G	A G	A G	G G	G G	A G	G G	A G	A G	G G	A A	G G	G G
8	8_26500948	0	26500948	T C	C C	C C	C C	C C	T C	C C	C C	C C	C C	C C	C C	C C	C C	T T	C C	C C	C C	C C	C C	C C	C C	C C	C C	C C	T C	C C	C C	C C	C C	C C	T C
8	8_26510631	0	26510631	C C	T C	C C	C C	T C	C C	T T	C C	C C	T T	T T	T C	T C	C C	C C	T C	T C	C C	T T	T C	T C	T C	C C	C C	C C	C C	C C	T C	C C	T C	C C	C C
8	8_26535834	0	26535834	T T	T T	C T	C T	T T	T T	C T	C C	T T	C T	C T	T T	T T	C T	T T	T T	T T	T T	T T	T T	C T	T T	T T	C T	T T	T T	T T	T T	T T	T T	T T	T T
8	8_26540111	0	26540111	C C	C C	T C	T C	C C	C C	C C	T C	C C	C C	C C	C C	C C	T C	C C	C C	C C	C C	C C	C C	T C	C C	C C	C C	T C	C C	C C	C C	C C	T C	C C	C C
8	8_26577259	0	26577259	G G	T G	T G	T G	T G	G G	G G	T G	G G	G G	G G	G G	G G	T G	G G	T G	G G	T G	T G	T G	T T	G G	G G	G G	G G	G G	G G	T G	G G	T G	G G	G G
8	8_26641666	0	26641666	T T	T T	T T	T T	T T	G T	G T	T T	T T	G T	G T	G T	G T	T T	G G	T T	G T	T T	G T	T T	T T	G T	T T	T T	T T	T T	T T	T T	T T	T T	T T	G T
8	8_26676978	0	26676978	T T	C T	T T	C T	C T	T T	C T	C T	T T	C T	C T	C C	C T	T T	T T	C T	C T	C C	C C	C T	C C	C T	C T	T T	C T	T T	T T	C C	T T	C C	T T	C T
8	8_26689546	0	26689546	T T	G T	T T	G T	G T	T T	G T	G T	T T	G T	G T	G G	G T	T T	T T	G T	G T	G G	G G	G T	G G	G T	G T	T T	G T	T T	T T	G G	T T	G G	T T	G T
8	8_26769012	0	26769012	G G	A G	G G	A G	A G	G G	A G	A G	G G	A G	A G	A G	G G	G G	G G	A G	G G	A G	A G	A G	A G	G G	A G	A G	G G	G G	G G	A A	G G	A G	G G	A G
8	8_26784924	0	26784924	T T	T T	T T	T T	T T	T T	C T	C T	T T	C T	C T	T T	T T	T T	T T	T T	T T	T T	T T	T T	T T	T T	T T	C T	T T	T T	T T	T T	T T	T T	T T	T T
8	8_26826471	0	26826471	T T	T C	T T	T C	T C	T T	T C	T C	T T	T C	T C	C C	C C	T C	T T	C C	C C	T C	C C	T C	C C	T C	T C	T C	T C	T T	T C	C C	T T	C C	T T	T C
8	8_26826598	0	26826598	T T	T T	T T	T T	T T	T T	G T	T T	T T	G T	G T	G T	G T	G T	T T	G T	G T	T T	G T	T T	T T	G T	T T	T T	T T	T T	G T	T T	T T	T T	T T	T T
8	8_26927345	0	26927345	G G	A G	A G	A A	A G	G G	A G	A G	G G	A G	A G	A A	A G	A A	G G	A A	A G	A G	A A	A G	A A	A G	A G	G G	G G	G G	A G	A A	G G	A G	G G	A G
8	8_26930532	0	26930532	T C	T C	T C	C C	C C	T C	C C	C C	T T	C C	C C	C C	C C	C C	C C	C C	C C	C C	C C	T C	C C	C C	T C	C C	T T	T C	C C	C C	T T	T C	T C	C C
8	8_26995953	0	26995953	A A	A A	G A	G A	G A	A A	G A	A A	A A	G A	G A	G A	G A	G G	A A	G G	G A	A A	G G	G A	A A	G G	A A	A A	A A	A A	G G	G A	A A	G A	G A	A A
8	8_27008588	0	27008588	T C	T C	T C	C C	C C	T T	T C	T C	T T	T C	T C	C C	C C	C C	T T	T C	C C	T C	T C	T T	C C	C C	T C	T C	T T	T C	C C	T C	T T	T T	T C	T C
8	8_27012262	0	27012262	A A	A A	A A	A A	G A	A A	A A	G A	A A	A A	A A	A A	G A	A A	A A	A A	G A	A A	A A	A A	G A	G A	A A	G A	A A	A A	G A	A A	A A	A A	G A	A A
8	8_27062953	0	27062953	T T	T T	T T	T T	T T	T T	T T	C T	T T	T T	T T	T T	T T	T T	T T	T T	T T	T T	C T	T T	C T	T T	T T	T T	T T	T T	T T	T T	T T	T T	T T	T T
8	8_27125154	0	27125154	C A	C A	C A	A A	A A	C A	C A	C A	C C	C A	C A	A A	A A	A A	A A	C A	A A	A A	C A	C A	A A	A A	C A	C A	C A	C A	A A	A A	C C	C A	C A	A A
8	8_27170649	0	27170649	T C	C C	C C	T C	T C	C C	C C	T C	C C	C C	C C	T C	C C	C C	C C	C C	C C	T C	T C	T C	T C	T C	T C	C C	C C	T C	T C	T T	C C	C C	T C	T C
8	8_27200532	0	27200532	G A	A A	A A	G A	A A	A A	G A	G A	A A	G A	G A	G A	A A	G A	A A	G A	A A	G G	A A	G A	A A	A A	G A	G A	G A	G A	G A	G G	A A	G A	A A	G A
8	8_27200889	0	27200889	C T	T T	T T	C T	T T	T T	C T	C T	T T	C T	C T	C T	T T	C T	T T	C T	T T	C C	T T	C T	T T	T T	C T	C T	C T	C T	C T	C C	T T	C T	T T	C T
8	8_27200895	0	27200895	T C	C C	C C	T C	C C	C C	T C	T C	C C	T C	T C	T C	C C	T C	C C	T C	C C	T T	C C	T C	C C	C C	T C	T C	T C	T C	T C	T T	C C	T C	C C	T C
8	8_27278380	0	27278380	T G	G G	G G	T G	G G	G G	T G	T G	G G	T G	T G	T G	T G	T G	G G	T G	T G	T T	G G	T G	G G	G G	T G	T T	T G	T G	T G	T T	G G	T G	G G	T G
8	8_27307573	0	27307573	C C	C C	C C	C C	C C	C C	C C	C C	C C	C C	C C	C C	C C	T C	C C	T T	C C	T C	T C	C C	C C	C C	C C	C C	T C	C C	T C	C C	C C	T T	C C	C C
8	8_27346995	0	27346995	A G	G G	G G	G G	G G	G G	G G	G G	G G	G G	G G	G G	G G	G G	G G	G G	G G	G G	G G	A G	G G	G G	G G	G G	G G	A G	G G	A G	G G	G G	G G	G G
8	8_27375680	0	27375680	G G	G G	G G	G G	G G	G G	G G	G G	G G	G G	G G	G G	G G	A G	G G	A G	G G	A G	G G	G G	G G	G G	G G	G G	A G	G G	A G	G G	G G	A G	G G	G G
8	8_27380284	0	27380284	T T	T T	T T	C T	T T	T T	C T	C C	T T	C T	C T	C T	T T	C T	T T	C C	T T	C C	C T	T T	C T	T T	C T	C T	C T	T T	C T	C T	T T	C C	T T	C T
8	8_27397738	0	27397738	C C	C C	C C	T C	C C	C C	T C	T T	C C	T C	T C	T C	C C	T C	C C	T T	C C	T T	T C	C C	T C	C C	T C	T C	T C	C C	T C	T C	C C	T T	C C	T C
8	8_27409049	0	27409049	A A	A A	A A	G A	A A	A A	G A	G G	A A	G A	G A	G A	A A	A A	A A	G A	A A	G A	G A	A A	G A	A A	G A	G A	A A	A A	A A	G A	A A	G A	A A	G A
8	8_27419250	0	27419250	G G	G G	G G	G G	G G	G G	G G	G G	G G	G G	G G	G G	A G	A G	G G	A G	A G	A G	G G	G G	G G	G G	G G	A G	A G	G G	A G	G G	G G	A G	G G	G G
8	8_27419544	0	27419544	T T	C T	T T	C C	C C	T T	C C	C C	T T	C C	C C	C C	C T	C T	T T	T T	C T	C T	C T	T T	C C	C C	C T	C T	T T	T T	C T	C T	T T	T T	C T	C T
8	8_27515776	0	27515776	A G	G G	A G	A G	G G	A G	A G	A G	G G	A G	A G	A G	A G	A G	A A	A G	A G	A A	G G	A G	G G	G G	A G	A A	A G	A G	A G	A A	G G	A G	G G	A A
8	8_27550021	0	27550021	G T	T T	G T	T T	G T	G T	T T	G T	T T	T T	T T	T T	G T	G T	G G	G T	G T	G T	G T	G T	G T	G T	T T	G T	G T	G T	G G	G T	T T	G T	G T	G T
8	8_27568279	0	27568279	T T	T T	T T	T T	T T	C T	T T	T T	T T	T T	T T	T T	T T	C T	C T	C T	T T	C T	T T	T T	T T	T T	T T	T T	C T	T T	C T	T T	T T	C T	T T	C T
8	8_27585859	0	27585859	T T	T T	T T	G T	T T	G T	T T	G T	T T	T T	T T	G T	T T	G T	G T	G T	T T	G G	T T	T T	G T	T T	G T	T T	G T	T T	G T	G T	T T	G T	T T	G G
8	8_27643681	0	27643681	A A	A A	A A	G A	A A	G A	A A	G A	A A	A A	A A	G A	A A	G A	G A	G A	A A	G G	A A	A A	G A	A A	G A	A A	G A	A A	G A	G A	A A	G A	A A	G G
8	8_27694452	0	27694452	C C	C C	C C	C C	C C	C C	T C	C C	C C	T C	C C	C C	T T	T C	C C	T C	T C	T C	C C	C C	C C	C C	C C	T C	T C	C C	T C	C C	C C	T C	C C	C C
8	8_27773098	0	27773098	T T	T C	T T	C C	T C	T C	C C	C C	T C	C C	C C	C C	C C	C C	T C	C C	C C	C C	T C	T C	C C	T C	T C	C C	C C	C C	T C	T C	C C	C C	T T	C C
8	8_27865163	0	27865163	A A	A A	A A	A A	A A	C A	A A	A A	C A	A A	A A	A A	A A	A A	C A	A A	A A	A A	A A	C A	A A	A A	A A	A A	C A	C A	A A	A A	C C	A A	A A	C A
8	8_27887315	0	27887315	T T	T T	T T	T T	T T	T T	T T	T T	T T	T T	T T	T T	T T	T T	T T	T T	T T	T T	T T	T T	T T	T T	T T	T T	T T	T T	T T	T T	T T	T T	T T	T T
8	8_27953740	0	27953740	G G	A G	G G	A G	A G	G G	A G	A G	G G	A G	A A	A G	G G	A G	G G	G G	A G	G G	G G	G G	A G	A G	G G	A G	G G	G G	G G	G G	G G	G G	G G	G G
8	8_27978277	0	27978277	C C	T C	C C	T C	T C	C C	T C	T C	C C	T C	T T	T C	C C	T C	C C	C C	T C	C C	C C	C C	T C	T C	C C	T C	C C	C C	C C	C C	C C	C C	C C	C C
8	8_28016179	0	28016179	C C	T C	C C	T C	T C	C C	T C	T T	C C	T C	T T	T C	C C	T T	C C	T T	T C	T C	T T	C C	T T	T C	C C	T C	T C	C C	T C	C C	C C	T T	C C	C C
8	8_28069690	0	28069690	G G	A G	G G	A G	A G	G G	A G	A G	G G	A G	A A	A G	G G	A G	G G	G G	A G	G G	G G	G G	A G	A G	G G	A G	G G	G G	G G	G G	G G	G G	G G	G G
8	8_28082385	0	28082385	G G	G G	G G	G G	G G	G G	G G	G G	G G	G G	G G	G G	G G	G G	G G	G G	G G	G G	G G	G G	G G	G G	G G	G G	G G	G G	G G	G G	G G	G G	G G	G G
8	8_28139509	0	28139509	G G	G G	G G	G G	G G	G G	G G	A G	G G	G G	G G	G G	G G	A G	G G	A A	G G	A G	A A	G G	A G	G G	G G	G G	A G	G G	A G	G G	G G	A A	G G	G G
8	8_28199065	0	28199065	G G	A G	G G	A G	A G	G G	A G	A G	G G	A G	A A	A G	G G	A G	G G	G G	A G	G G	G G	G G	A G	A G	G G	A G	G G	G G	G G	G G	G G	G G	G G	G G
8	8_28201824	0	28201824	C C	C C	C C	C C	C C	C C	C C	T C	C C	C C	C C	C C	C C	T C	C C	T T	C C	T C	T T	C C	T C	C C	C C	C C	T C	C C	T C	C C	C C	T T	C C	C C
8	8_28202263	0	28202263	C C	T C	C C	T C	T C	C C	T C	T C	C C	T C	T T	T C	C C	T C	C C	C C	T C	C C	C C	C C	T C	T C	C C	T C	C C	C C	C C	C C	C C	C C	C C	C C
8	8_28260573	0	28260573	C T	T T	C T	C T	C T	C T	C T	C T	T T	C T	T T	C T	C C	C T	C C	C C	C T	C C	C C	T T	C T	C T	C T	C T	T T	C T	C C	C T	T T	C T	C T	C C
8	8_28355849	0	28355849	A A	A A	A A	G A	A A	A A	A A	A A	A A	A A	A A	G A	A A	A A	A A	A A	A A	G A	A A	A A	A A	A A	G A	A A	A A	A A	A A	G A	A A	A A	A A	G A
8	8_28430555	0	28430555	T T	C T	T T	C T	C T	T T	C T	T T	C T	C T	C C	C T	T T	C T	T T	T T	C T	C T	T T	C T	C T	C T	T T	C T	C C	C C	T T	T T	C C	C T	T T	T T
8	8_28430811	0	28430811	T T	T T	T T	T T	T T	G T	T T	G T	T T	T T	T T	T T	T T	G T	G T	G G	T T	T T	G T	G T	G T	T T	T T	T T	T T	T T	G T	G T	T T	G T	T T	G T
8	8_28452448	0	28452448	G G	G A	G A	A A	A A	G A	A A	A A	G A	A A	A A	A A	A A	A A	A A	A A	A A	A A	A A	A A	A A	A A	G A	A A	A A	A A	A A	A A	A A	A A	G A	A A
8	8_28452666	0	28452666	C C	T C	C C	T C	T C	C C	T C	C C	T C	T C	T T	T C	C C	T C	C C	C C	T C	T C	C C	T C	T C	T C	C C	T C	T T	T C	C C	C C	T T	T C	C C	C C
8	8_28479325	0	28479325	A A	A A	A A	G A	G A	A A	A A	G A	A A	A A	A A	G A	A A	G A	A A	G G	A A	G A	G A	A A	G A	G A	G A	A A	A A	A A	G A	G A	A A	G A	G A	G A
8	8_28506256	0	28506256	C A	C A	0 0	A A	A A	C A	A A	A A	C A	A A	A A	A A	A A	A A	A A	A A	A A	A A	A A	0 0	A A	A A	A A	A A	A A	A A	A A	A A	A A	A A	C A	A A
8	8_28574183	0	28574183	A A	G A	A A	G A	G A	G A	G A	A A	G A	G A	G G	G A	A A	G A	G A	A A	G A	G A	G A	G A	G A	G A	A A	G A	G G	G A	A A	A A	G G	G G	A A	G A
8	8_28630008	0	28630008	T T	T G	T G	G G	G G	T G	T G	T T	T G	T G	G G	G G	T T	T G	G G	T T	T G	G G	T G	G G	T G	G G	T G	0 0	G G	T G	T G	G G	G G	G G	T G	G G
8	8_28635076	0	28635076	G G	G G	G G	G G	G G	G G	G G	A G	G G	G G	G G	G G	G G	A G	G G	A A	G G	G G	G G	G G	A G	G G	G G	G G	G G	G G	A G	G G	G G	G G	G G	G G
8	8_28728010	0	28728010	G G	G G	G G	G G	G G	G G	G G	G G	G G	G G	G G	G G	G G	G G	G G	G G	G G	G G	G G	A G	G G	G G	G G	G G	G G	G G	G G	A G	G G	G G	G G	G G
8	8_28730876	0	28730876	A A	A A	A A	A A	A A	A A	A A	C A	A A	A A	A A	A A	A A	C A	A A	C C	A A	A A	A A	A A	C A	A A	A A	A A	A A	A A	C A	A A	A A	A A	A A	A A
8	8_28814835	0	28814835	T T	T T	C T	T T	T T	T T	C T	C C	T T	C T	T T	T T	0 0	C T	C T	C C	C T	T T	T T	T T	C T	T T	T T	C T	T T	T T	C T	T T	T T	T T	T T	T T
8	8_28846667	0	28846667	T T	T T	T T	T T	T T	T T	T T	C T	T T	T T	T T	T T	T T	C T	T T	C C	T T	T T	T T	T T	C T	T T	T T	T T	T T	T T	C T	T T	T T	T T	T T	T T
8	8_28933246	0	28933246	A A	A G	A A	G G	G G	A A	G G	A G	A G	G G	G G	G G	G G	A G	A A	A A	G G	G G	A G	G G	A G	G G	A G	G G	G G	A G	A G	G G	G G	G G	A G	A G
8	8_29017097	0	29017097	G G	G G	G G	A G	G G	G G	A G	A G	G G	A G	G G	A G	A A	G G	G G	G G	A G	A G	A G	G G	G G	G G	A G	A G	G G	G G	G G	A G	G G	G G	G G	A G
8	8_29351654	0	29351654	A G	A G	A A	A G	G G	A G	A G	A G	A A	A G	G G	A G	A A	G G	A G	A G	A G	A G	G G	A G	G G	G G	A A	A G	A G	A A	G G	A G	A A	G G	A G	A G
8	8_29419499	0	29419499	T C	C C	C C	C C	C C	C C	C C	C C	C C	C C	C C	C C	C C	C C	C C	C C	C C	C C	C C	C C	C C	C C	C C	C C	C C	C C	C C	C C	C C	C C	C C	C C
8	8_29502857	0	29502857	T C	T C	T T	C C	C C	T C	C C	C C	T T	C C	C C	C C	C C	C C	T C	T C	C C	C C	C C	T T	C C	C C	T C	C C	T C	T T	C C	T C	T T	C C	T C	C C
8	8_29635582	0	29635582	A A	A A	A A	A A	A A	A A	A A	G A	A A	A A	A A	A A	A A	G A	A A	G A	A A	A A	A A	A A	G A	A A	A A	A A	A A	A A	G A	A A	A A	A A	A A	A A
8	8_29687334	0	29687334	A A	G A	A A	G A	G A	G A	G A	G A	A A	G A	G G	G A	A A	G G	G A	G A	G A	G A	G G	A A	G G	G A	A A	G A	A A	A A	G A	A A	A A	G A	A A	G A
8	8_29703143	0	29703143	T C	C C	C C	C C	T C	C C	C C	C C	C C	C C	C C	C C	C C	C C	C C	C C	C C	C C	C C	C C	C C	T C	C C	C C	C C	C C	T C	C C	C C	C C	T C	C C
8	8_29710803	0	29710803	G G	G G	G G	G G	G G	G G	G G	A G	G G	G G	G G	G G	G G	A G	G G	A G	G G	G G	G G	G G	A G	G G	G G	G G	G G	G G	A G	G G	G G	G G	G G	G G
8	8_29716343	0	29716343	A A	A A	A A	A A	A A	C A	A A	A A	A A	A A	A A	A A	A A	A A	C A	A A	A A	A A	C A	A A	A A	A A	A A	A A	A A	A A	A A	A A	A A	A A	A A	C A
8	8_29729387	0	29729387	T T	T T	T T	T T	T T	C T	T T	T T	T T	T T	T T	T T	T T	T T	C T	T T	T T	T T	T T	T T	T T	T T	T T	T T	T T	T T	T T	T T	T T	T T	T T	C T
8	8_29769876	0	29769876	G G	G G	G G	G G	G G	G G	G G	A G	G G	G G	G G	G G	G G	A G	G G	A G	G G	G G	G G	G G	A G	G G	G G	G G	G G	G G	A G	G G	G G	G G	G G	G G
8	8_29773971	0	29773971	A A	A A	A A	A A	A A	A A	A A	G A	A A	A A	A A	A A	A A	G A	A A	G A	A A	A A	A A	A A	G A	A A	A A	A A	A A	A A	G A	A A	A A	A A	A A	A A
8	8_29802895	0	29802895	G A	A A	A A	A A	G A	A A	A A	A A	A A	A A	A A	A A	A A	A A	A A	A A	A A	A A	A A	A A	A A	G A	A A	A A	A A	A A	G A	A A	A A	A A	G A	A A
8	8_29832395	0	29832395	A A	G A	A A	G A	G A	G A	G A	G A	A A	G A	G G	G A	A A	G G	G A	G A	G A	G A	G G	A A	G G	G A	A A	G A	A A	A A	G A	A A	A A	G A	A A	G A
8	8_29852489	0	29852489	A A	A A	A A	A A	A A	G A	A A	G A	A A	A A	A A	A A	A A	G A	G A	G A	A A	A A	G A	A A	G A	A A	A A	A A	A A	A A	G A	A A	A A	A A	A A	G A
8	8_29865141	0	29865141	C C	C C	C C	C C	C C	C C	C C	T C	C C	C C	C C	C C	C C	T C	C C	T C	C C	C C	C C	C C	T C	C C	C C	C C	C C	C C	T C	C C	C C	C C	C C	C C
8	8_29891145	0	29891145	T T	T T	T T	T T	T T	T T	T T	C T	T T	T T	T T	T T	T T	C T	T T	C T	T T	T T	T T	T T	C T	T T	T T	T T	T T	T T	C T	T T	T T	T T	T T	T T
8	8_29891422	0	29891422	C C	C C	C C	C C	C C	C C	C C	T C	C C	C C	C C	C C	C C	T C	C C	T C	C C	C C	C C	C C	T C	C C	C C	C C	C C	C C	T C	C C	C C	C C	C C	C C
8	8_29924976	0	29924976	C T	C T	C C	C T	T T	C T	C T	C T	C C	C T	T T	C T	C C	T T	C T	C T	C T	C T	T T	C C	T T	T T	C C	C T	C C	C C	T T	C C	C C	C T	C T	C T
8	8_29964440	0	29964440	G G	G G	G G	G G	G G	G G	G G	A G	G G	G G	G G	G G	G G	A G	G G	0 0	G G	G G	G G	G G	A G	G G	G G	G G	G G	G G	A G	G G	G G	G G	G G	G G
8	8_29990128	0	29990128	A A	C A	A A	C A	C A	A A	C A	A A	A A	C A	C C	C A	A A	C A	A A	A A	C A	C A	C A	A A	C A	C A	A A	C A	A A	A A	A A	A A	A A	C A	A A	A A
8	8_30080323	0	30080323	G G	G G	A G	A G	A A	G G	G G	A G	A A	G G	A G	A G	G G	A G	G G	A A	A G	A G	G G	A A	A G	A G	A G	G G	A G	A G	A A	A G	A G	A G	A G	A G
8	8_30120942	0	30120942	T T	T T	C T	C T	C C	T T	T T	C T	C C	T T	C T	C T	T T	C T	T T	C C	C T	C T	T T	C C	C T	C T	C T	T T	C T	C T	C C	C T	C T	C T	C T	C T
8	8_30185149	0	30185149	G A	G A	G G	G A	A A	G A	G A	G A	G G	G A	A A	G A	G G	A A	G A	G A	G A	G A	A A	G G	A A	A A	G G	G A	G G	G G	A A	G G	G G	G A	G A	G A
8	8_30419639	0	30419639	G A	A A	A A	A A	A A	A A	A A	G A	A A	A A	A A	A A	A A	G A	A A	G A	A A	A A	A A	A A	G A	A A	A A	A A	A A	A A	G A	A A	A A	A A	A A	A A
8	8_30446141	0	30446141	A A	A A	A A	A A	A A	G A	A A	A A	A A	A A	A A	A A	A A	A A	G A	A A	A A	A A	A A	A A	A A	A A	A A	A A	A A	A A	A A	A A	A A	A A	A A	G A
8	8_30454083	0	30454083	G A	G A	G G	A A	A A	G A	A A	A A	G G	A A	A A	A A	A A	A A	G A	G A	A A	A A	A A	G G	A A	A A	G A	A A	G G	G G	A A	G A	G G	G A	G A	A A
8	8_30454234	0	30454234	T C	C C	C C	C C	C C	C C	C C	T C	C C	C C	C C	C C	C C	T C	C C	T C	C C	C C	C C	C C	T C	C C	C C	C C	C C	C C	T C	C C	C C	C C	C C	C C
8	8_30507813	0	30507813	C C	C C	C C	C C	C C	C C	C C	T C	C C	C C	C C	C C	C C	T C	C C	T C	C C	C C	C C	C C	T C	C C	C C	C C	C C	C C	T C	C C	C C	C C	C C	C C
8	8_30526194	0	30526194	A G	G G	G G	G G	G G	A G	A G	A G	G G	A G	G G	G G	A A	G G	A G	G G	A G	G G	G G	G G	G G	G G	G G	A G	G G	G G	G G	G G	G G	G G	G G	A G
8	8_30606407	0	30606407	G G	A G	G G	A G	A G	G G	A G	A G	G G	A G	A A	A G	G G	A A	G G	A G	A G	A G	A A	G G	A A	A G	G G	A G	G G	G G	A G	G G	G G	A G	G G	G G
8	8_30632742	0	30632742	T C	T C	C C	T C	T T	C C	T C	T C	C C	T C	T T	T C	C C	T T	C C	T C	T C	T C	T T	C C	T T	T T	C C	T C	C C	C C	T T	C C	C C	T C	T C	C C
8	8_30670950	0	30670950	A G	A G	A A	A G	A G	A G	G G	G G	A G	G G	G G	A G	G G	G G	A G	A G	G G	A G	G G	A G	G G	A G	A A	G G	A G	A G	A G	A A	G G	A G	A A	A G
8	8_30674450	0	30674450	C T	C T	C C	C T	T T	C T	T T	T T	C T	T T	T T	C T	T T	T T	C T	C T	T T	C T	T T	C T	T T	T T	C C	T T	C T	C T	T T	C C	T T	C T	C T	C T
8	8_30729188	0	30729188	A G	G G	G G	G G	G G	A G	G G	G G	G G	G G	G G	G G	G G	G G	A G	G G	G G	G G	G G	G G	G G	G G	G G	G G	G G	G G	G G	G G	G G	G G	G G	A G
8	8_30756405	0	30756405	C T	C T	C C	C T	T T	C T	C T	C T	C T	C T	T T	C T	C C	T T	C T	C T	C T	C T	T T	C T	T T	T T	C C	C T	C T	C T	T T	C C	T T	C T	C T	C T
8	8_30771898	0	30771898	G G	G G	G G	G G	G G	A G	G G	A G	G G	G G	G G	G G	G G	A G	A G	A G	G G	G G	A G	G G	A G	G G	G G	G G	G G	G G	A G	G G	G G	G G	G G	A G
8	8_30790573	0	30790573	C C	C C	C C	C C	C C	C C	C C	T C	T C	C C	C C	C C	C C	T C	C C	T C	C C	C C	T C	T C	T C	C C	C C	C C	T C	T C	T C	C C	T T	C C	C C	C C
8	8_30856460	0	30856460	T T	T C	T T	T C	C C	T C	C C	T C	T C	C C	C C	T C	C C	T C	T C	T T	C C	T T	T C	T C	T C	C C	T T	C C	C C	T C	T C	T T	C C	C C	T C	T C
8	8_30884438	0	30884438	T T	T T	T T	T T	T T	T T	T T	C T	T T	T T	T T	T T	T T	C T	T T	C T	T T	C T	T T	T T	C T	T T	T T	T T	T T	T T	C T	T T	T T	T T	T T	T T
8	8_30940232	0	30940232	A G	A G	A A	A G	G G	A G	G G	A G	A G	G G	G G	A G	G G	A G	A G	A A	G G	A G	A G	A G	A G	G G	A A	G G	G G	A G	A G	A A	G G	G G	A G	A G
8	8_31052159	0	31052159	G G	G G	G G	G G	G G	G G	G G	A G	G G	G G	G G	G G	G G	A G	G G	A G	G G	G G	A G	G G	A G	G G	G G	G G	G G	G G	A G	G G	G G	G G	G G	G G
8	8_31151151	0	31151151	T T	T T	C T	C T	T T	C T	C T	C T	T T	C T	T T	C T	C C	C T	C C	C C	C T	C T	T T	C T	T T	T T	C T	C T	C T	T T	C T	C C	T T	C T	T T	C C
8	8_31187135	0	31187135	A G	A A	A G	A G	A G	A G	A G	A G	A G	A G	A A	A G	G G	A G	G G	G G	A G	G G	A G	G G	A A	A G	A G	A G	G G	A G	G G	G G	G G	A G	A G	G G
8	8_31217721	0	31217721	C A	A A	A A	A A	C A	A A	A A	A A	C A	A A	A A	A A	A A	C A	A A	C A	A A	C A	A A	C A	A A	C A	A A	A A	C A	C A	C C	A A	C C	A A	C A	A A
8	8_31220925	0	31220925	A A	A G	A G	G G	A G	A G	G G	A G	A A	G G	G G	G G	G G	A G	G G	A G	G G	A G	G G	A G	A G	A G	A G	G G	A G	A G	A A	G G	A A	G G	A A	G G
8	8_31290588	0	31290588	G G	G G	G G	G G	A G	G G	G G	G G	A G	G G	G G	G G	G G	G G	G G	G G	G G	G G	G G	A G	G G	A G	G G	G G	A G	A G	A G	G G	A A	G G	A G	G G
8	8_31344735	0	31344735	C C	C C	A C	A C	C C	C C	C C	C C	C C	C C	C C	A C	C C	C C	A C	A C	C C	A C	C C	A C	C C	C C	A C	C C	C C	C C	C C	A A	C C	C C	C C	A C
8	8_31361206	0	31361206	C C	T C	C C	T C	T C	C C	T T	T C	C C	T T	T T	T C	T T	T C	C C	C C	T T	C C	T C	C C	T C	T C	C C	T T	T C	T C	C C	C C	C C	T T	C C	C C
8	8_31491056	0	31491056	A G	A G	A A	A G	G G	A A	G G	A G	A G	G G	G G	A G	G G	A G	A A	A A	G G	A A	A G	A G	A G	G G	A A	G G	G G	G G	A G	A A	G G	G G	A G	A A
8	8_31491108	0	31491108	C T	C T	T T	C T	C T	T T	C T	T T	T T	C T	C C	C T	T T	C T	T T	T T	C T	T T	C T	T T	C T	C T	T T	C T	T T	C T	T T	T T	T T	C T	T T	T T
8	8_31504074	0	31504074	C A	C A	A A	C A	C C	A A	C A	A A	C A	C A	C C	C A	A A	C A	A A	A A	C A	A A	C C	C A	C A	C C	A A	C A	C A	C C	C A	A A	C C	C A	C A	A A
8	8_31560462	0	31560462	A G	G G	G G	G G	G G	G G	G G	G G	G G	G G	G G	G G	G G	G G	G G	G G	G G	A G	G G	G G	G G	G G	G G	G G	G G	G G	G G	G G	G G	G G	G G	G G
8	8_31713672	0	31713672	T C	C C	T C	T C	C C	T C	T T	T C	C C	T T	T C	T C	T T	T C	T T	T T	T C	T C	T T	C C	C C	C C	T C	T T	C C	C C	T C	T C	C C	T C	C C	T T
8	8_31713687	0	31713687	T C	C C	T C	T C	C C	T C	T T	T C	C C	T T	T C	T C	T T	T C	T T	T T	T C	T C	T T	C C	C C	C C	T C	T T	C C	C C	T C	T C	C C	T C	C C	T T
8	8_31759762	0	31759762	T T	T T	T T	T T	T T	T T	T T	G T	T T	T T	T T	T T	T T	T T	T T	T T	T T	T T	T T	T T	G T	T T	T T	T T	T T	T T	T T	T T	T T	T T	T T	T T
8	8_31779009	0	31779009	G G	G G	G G	G G	G G	G G	A G	G G	G G	A G	A G	G G	G G	A G	G G	A G	G G	G G	A G	G G	G G	G G	G G	A G	G G	G G	A G	G G	G G	A G	G G	G G
8	8_31812877	0	31812877	A A	A A	A A	A A	A A	A A	C A	A A	A A	C A	C A	A A	A A	C A	A A	C A	A A	A A	C A	A A	A A	A A	A A	C A	A A	A A	C A	A A	A A	C A	A A	A A
8	8_31825939	0	31825939	T T	T C	T C	T C	C C	T C	T T	T C	T C	T T	T C	T C	T T	T C	C C	T C	T C	T T	T C	C C	C C	C C	T T	T T	C C	T C	T C	T C	C C	T C	T C	T C
8	8_31896104	0	31896104	G G	G G	G G	G G	G G	G G	A G	G G	G G	A G	A G	G G	G G	A G	G G	A G	G G	G G	A A	G G	G G	G G	G G	A G	G G	G G	A G	G G	G G	A G	G G	G G
8	8_31922942	0	31922942	G A	A A	A A	G A	A A	A A	A A	A A	G A	A A	A A	G A	A A	A A	A A	A A	A A	G A	A A	G A	A A	A A	G A	A A	G A	G A	A A	G A	G G	A A	A A	G A
8	8_31970860	0	31970860	A A	A A	A A	G A	A A	A A	A A	A A	A A	A A	A A	G A	A A	A A	A A	A A	A A	G A	A A	A A	A A	A A	G A	A A	A A	A A	A A	G A	A A	A A	A A	G A
8	8_32000354	0	32000354	A A	A A	A A	G A	A A	A A	A A	A A	A A	A A	A A	G A	A A	A A	A A	A A	A A	G A	A A	A A	A A	A A	G A	A A	A A	A A	A A	G A	A A	A A	A A	G A
8	8_32000644	0	32000644	C C	C C	C C	T C	C C	C C	C C	C C	C C	C C	C C	T C	C C	C C	C C	C C	C C	T C	C C	C C	C C	C C	T C	C C	C C	C C	C C	T C	C C	C C	C C	T C
8	8_32027084	0	32027084	G G	G G	G G	A G	G G	G G	G G	G G	G G	G G	G G	A G	G G	G G	G G	G G	G G	A G	G G	G G	G G	G G	A G	G G	G G	G G	G G	A G	G G	G G	G G	A G
8	8_32067699	0	32067699	T C	T C	T C	C C	C C	T C	T C	C C	T C	T C	T C	C C	C C	T C	C C	T C	C C	T C	T T	C C	C C	C C	T C	T C	C C	T C	T C	C C	C C	T C	T C	C C
8	8_32086010	0	32086010	G T	G T	G T	T T	T T	G T	G T	T T	G T	G T	G T	T T	T T	G T	T T	G T	T T	G T	G G	T T	T T	T T	G T	G T	T T	G T	G T	T T	T T	G T	G T	T T
8	8_32127539	0	32127539	T C	T C	T C	C C	C C	T C	T C	C C	T C	T C	T C	C C	C C	T C	C C	T C	C C	T C	T T	C C	C C	C C	T C	T C	C C	T C	T C	C C	C C	T C	T C	C C
8	8_32194579	0	32194579	T C	T C	T C	C C	T C	T C	T T	T C	T C	T T	T C	C C	T T	T C	C C	T C	T C	T C	T T	C C	C C	T C	T C	T T	T C	T C	T T	C C	C C	T T	T T	C C
8	8_32194965	0	32194965	A G	A G	A G	G G	A G	A G	A A	A G	A G	A A	A G	G G	A A	A G	G G	A G	A G	A G	A A	G G	G G	A G	A G	A A	A G	A G	A A	G G	G G	A A	A A	G G
8	8_32194974	0	32194974	G T	G T	G T	T T	G T	G T	G G	G T	G T	G G	G T	T T	G G	G T	T T	G T	G T	G T	G G	T T	T T	G T	G T	G G	G T	G T	G G	T T	T T	G G	G G	T T
8	8_32195352	0	32195352	C C	C C	C C	C C	C C	C C	C C	T C	C C	C C	C C	C C	C C	C C	C C	C C	C C	C C	C C	C C	T C	C C	C C	C C	C C	C C	C C	C C	C C	C C	C C	C C
8	8_32195472	0	32195472	C T	C T	C T	T T	C T	C T	C C	C T	C T	C C	C T	T T	C C	C T	T T	C T	C T	C T	C C	T T	T T	C T	C T	C C	C T	C T	C C	T T	T T	C C	C C	T T
8	8_32253974	0	32253974	T C	T C	T C	C C	C C	T C	T T	T C	T C	T T	T C	C C	T T	T C	C C	T C	T C	T C	T C	C C	C C	C C	T C	T T	C C	C C	T C	C C	C C	T C	T C	C C
8	8_32267292	0	32267292	A G	G G	A G	G G	A G	A G	A G	A A	G G	A G	G G	G G	A A	A G	A A	A A	A G	G G	A G	A G	A G	A G	G G	A G	A G	A G	A A	A G	G G	A G	A G	A G
8	8_32267457	0	32267457	G A	G G	G A	G A	G A	G A	G A	A A	G A	G A	G G	G A	A A	G A	A A	A A	G A	G A	G A	G A	G A	G A	G A	G A	A A	A A	A A	G A	A A	G A	G A	A A
8	8_32318305	0	32318305	C T	C T	C T	T T	C T	C T	C T	T T	C T	C T	C T	T T	T T	T T	T T	T T	T T	C T	C T	C T	T T	C T	C T	C T	C T	T T	C T	C T	T T	C C	C C	T T
8	8_32318959	0	32318959	G A	G A	G A	A A	G A	G A	G A	A A	G A	G A	G A	A A	A A	A A	A A	A A	A A	G A	G A	G A	A A	G A	G A	G A	G A	A A	G A	G A	A A	G G	G G	A A
8	8_32542686	0	32542686	G G	A G	G G	A G	A G	G G	G G	G G	G G	G G	A G	A G	G G	A G	G G	G G	A G	G G	G G	A G	A G	A G	G G	G G	G G	G G	G G	A G	G G	G G	G G	G G
8	8_32542991	0	32542991	A A	G A	A A	G A	G A	A A	A A	A A	A A	A A	G A	G A	A A	G A	A A	A A	G A	A A	A A	A A	G A	G A	A A	A A	A A	A A	A A	A A	A A	A A	A A	A A
8	8_32580035	0	32580035	T T	C T	T T	C C	C T	T T	T T	T T	C T	T T	C T	C C	T T	C T	T T	T T	C T	C T	T T	C C	C T	C T	C T	T T	C T	C T	T T	C C	C C	T T	T T	C T
8	8_32584061	0	32584061	0 0	A A	A A	G A	A A	A A	A A	A A	G A	A A	A A	G A	A A	A A	A A	A A	A A	G A	A A	G A	A A	A A	G A	A A	G A	G A	A A	G A	G G	A A	A A	G A
8	8_32589746	0	32589746	C C	C C	C C	A C	C C	C C	C C	C C	A C	C C	C C	A C	C C	C C	C C	C C	C C	A C	C C	A C	C C	C C	A C	C C	A C	A C	C C	A C	A A	C C	C C	A C
8	8_32626922	0	32626922	C C	T C	C C	T C	T C	C C	C C	C C	C C	C C	T C	T C	C C	T C	C C	C C	T C	C C	C C	C C	T C	T C	C C	C C	C C	C C	C C	C C	C C	C C	C C	C C
8	8_32736094	0	32736094	G G	G A	G G	A A	G A	G G	A A	G A	G A	A A	A A	A A	A A	A A	G G	G A	A A	A A	G A	G A	G A	G A	G A	A A	A A	G A	G A	G A	A A	A A	G G	G A
8	8_32750055	0	32750055	G G	G G	G G	A G	G G	G G	G G	G G	A G	G G	G G	A G	G G	G G	G G	G G	G G	A G	G G	A G	G G	G G	A G	G G	A G	A G	G G	A G	A A	G G	G G	A G
8	8_32761763	0	32761763	A A	A A	A A	G A	A A	A A	G A	A A	G A	G A	G A	G A	A A	A A	A A	A A	A A	G A	G A	G A	A A	A A	G A	G A	G G	G A	A A	G A	G G	G G	A A	G A
8	8_32828093	0	32828093	G G	G A	G G	A A	G A	G G	A A	G A	G A	A A	A A	A A	A A	A A	G G	G A	A A	A A	G A	G A	G A	G A	G A	A A	A A	G A	G A	G A	A A	A A	G G	G A
8	8_32879280	0	32879280	G G	G G	G G	G G	G G	G G	A G	A G	G G	A G	G G	G G	A A	A G	G G	A G	A G	A G	G G	G G	G G	G G	G G	A G	G G	G G	A G	G G	G G	G G	G G	G G
8	8_32879743	0	32879743	A A	A A	A A	A A	A A	A A	G A	G A	A A	G A	A A	A A	G G	G A	A A	G A	G A	G A	A A	A A	A A	A A	A A	G A	A A	A A	G A	A A	A A	A A	A A	A A
8	8_32879761	0	32879761	C C	C C	C C	C C	C C	C C	T C	T C	C C	T C	C C	C C	T T	T C	C C	T C	T C	T C	C C	C C	C C	C C	C C	T C	C C	C C	T C	C C	C C	C C	C C	C C
8	8_32888340	0	32888340	T T	T T	T T	T T	T T	T T	T T	T T	T T	T T	T T	T T	T T	T T	T T	T T	T T	T T	T T	T T	T T	T T	T T	T T	T T	T T	T T	T T	T T	T T	T T	T T
8	8_32895873	0	32895873	G G	G A	G G	A A	G A	G G	A A	G A	G A	A A	A A	A A	A A	A A	G G	G A	A A	A A	G A	G A	G A	G A	G A	A A	A A	G A	G A	G A	A A	A A	G G	G A
8	8_32951335	0	32951335	A A	A G	A A	G G	A G	A A	G G	G G	A G	G G	G G	G G	G G	G G	A A	A G	G G	G G	A G	A G	G G	A G	A G	G G	G G	A G	A G	A G	G G	G G	A A	A G
8	8_33004581	0	33004581	A A	A A	A A	A A	A A	A A	G A	G A	A A	G A	A A	A A	G G	G A	A A	G A	G A	G A	A A	A A	A A	A A	A A	G A	A A	A A	G A	A A	A A	A A	A A	A A
8	8_33011282	0	33011282	T T	T T	T T	C T	T T	T T	T T	T T	C T	T T	T T	C T	T T	T T	T T	T T	T T	C T	T T	C T	T T	T T	C T	T T	C T	C T	T T	C T	C C	T T	T T	C T
8	8_33069174	0	33069174	G G	G G	G G	A G	G G	G G	G G	G G	A G	G G	G G	A G	G G	G G	G G	G G	G G	A G	G G	A G	G G	G G	A G	G G	A G	A G	G G	A G	A A	G G	G G	A G
8	8_33072642	0	33072642	G G	G G	G G	G G	G G	G G	G G	G G	G G	G G	G G	G G	G G	G G	G G	G G	G G	G G	G G	G G	G G	G G	G G	G G	G G	G G	G G	G G	G G	G G	G G	G G
8	8_33151630	0	33151630	C C	C C	C C	A C	C C	C C	C C	C C	A C	C C	C C	A C	C C	C C	C C	C C	C C	A C	C C	A C	C C	C C	A C	C C	A C	A C	C C	A C	A A	C C	C C	A C
8	8_33183641	0	33183641	G G	G G	G G	G G	G G	G G	A G	G G	G G	A G	A G	G G	G G	G G	G G	G G	G G	G G	A G	G G	G G	G G	G G	A G	A G	G G	G G	G G	G G	A A	G G	G G
8	8_33184000	0	33184000	G G	G G	G G	G G	G G	G G	A G	G G	G G	A G	A G	G G	G G	G G	G G	G G	G G	G G	A G	G G	G G	G G	G G	A G	A G	G G	G G	G G	G G	A A	G G	G G
8	8_33207950	0	33207950	C C	C C	C C	T C	C C	C C	T C	T C	T C	T C	C C	T C	T T	T C	C C	T C	T C	T T	C C	T C	C C	C C	T C	T C	T C	T C	T C	T C	T T	C C	C C	T C
8	8_33207965	0	33207965	T T	T T	T T	T T	T T	T T	C T	T T	T T	C T	C T	T T	T T	T T	T T	T T	T T	T T	C T	T T	T T	T T	T T	C T	C T	T T	T T	T T	T T	C C	T T	T T
8	8_33240071	0	33240071	G G	G G	G G	G G	G G	G G	A G	G G	G G	A G	A G	G G	G G	G G	G G	G G	G G	G G	A G	G G	G G	G G	G G	A G	A G	G G	G G	G G	G G	A A	G G	G G
8	8_33240180	0	33240180	G G	G G	G G	A G	G G	G G	A G	A G	A G	A G	G G	A G	A A	A G	G G	A G	A G	A A	G G	A G	G G	G G	A G	A G	A G	A G	A G	A G	A A	G G	G G	A G
8	8_33243738	0	33243738	T T	T T	T T	T T	T T	T T	G T	T T	T T	G T	G T	T T	T T	T T	T T	T T	T T	T T	G T	T T	T T	T T	T T	G T	G T	T T	T T	T T	T T	G G	T T	T T
8	8_33279944	0	33279944	G G	G G	G G	A G	G G	G G	G G	G G	A G	G G	G G	A G	G G	G G	G G	G G	G G	A G	G G	A G	G G	G G	A G	G G	A G	A G	G G	A G	A A	G G	G G	A G
8	8_33300317	0	33300317	G G	G G	G G	A G	G G	G G	G G	G G	A G	G G	G G	A G	G G	G G	G G	G G	G G	A G	G G	A G	G G	G G	A G	G G	A A	A G	G G	A G	A A	0 0	G G	A G
8	8_33375519	0	33375519	G G	G A	G G	A A	A A	G G	A A	G A	G A	A A	A A	A A	A A	A A	G G	G A	A A	A A	G A	A A	G A	A A	G A	A A	A A	G A	A A	A A	A A	A A	G A	G A
8	8_33384922	0	33384922	A A	A A	A A	G A	A A	A A	A A	A A	G A	A A	A A	G A	A A	A A	A A	A A	A A	G A	A A	G A	A A	A A	G A	A A	G A	G A	A A	G A	G G	A A	A A	G A
8	8_33465641	0	33465641	G G	G G	G G	G G	G G	G G	A G	A A	G G	A G	G G	G G	A A	A G	G G	0 0	A G	A G	G G	G G	A G	G G	G G	A G	G G	G G	A G	G G	G G	G G	G G	G G
8	8_33504849	0	33504849	T T	T T	T T	T T	T T	T T	C T	C C	T T	C T	T T	T T	C C	C T	T T	C T	C T	C T	T T	T T	C T	T T	T T	C T	T T	T T	C T	T T	T T	T T	T T	T T
8	8_33518576	0	33518576	G A	G G	G A	G A	G A	G A	G A	G G	G A	G A	G A	G A	G G	G G	A A	G A	G G	A A	G A	G A	G G	G A	G A	G A	A A	A A	G A	G A	A A	A A	G A	A A
8	8_33536248	0	33536248	T C	C C	C C	T C	C C	C C	C C	C C	T C	C C	C C	T C	C C	C C	C C	C C	C C	T C	C C	T C	C C	C C	T C	C C	T C	T C	C C	T C	T T	C C	C C	T C
8	8_33553164	0	33553164	G A	G A	G A	A A	A A	G A	A A	A A	G A	A A	A A	A A	A A	A A	A A	A A	A A	A A	A A	A A	A A	A A	G A	A A	A A	A A	A A	A A	A A	A A	G A	A A
8	8_33555626	0	33555626	C T	C T	T T	C C	C T	T T	C T	C C	C T	C T	C T	C C	C C	C C	T T	C T	C C	C T	T T	C T	C C	C T	C T	C T	C T	C T	C T	C T	C C	T T	T T	C T
8	8_33559112	0	33559112	T C	T C	T C	C C	C C	T C	T C	C C	T C	T C	T C	C C	0 0	C C	C C	C C	C C	C C	T C	C C	C C	C C	T C	T C	T C	C C	C C	C C	C C	T T	T C	C C
8	8_33593378	0	33593378	G G	G G	G G	G G	G G	G G	A G	A A	G G	A G	G G	G G	A A	A G	G G	A G	A G	G G	G G	G G	A G	G G	G G	A G	G G	G G	A G	G G	G G	G G	G G	G G
8	8_33634519	0	33634519	A A	A C	A C	A C	C C	A C	A C	C C	A A	A C	A C	A C	C C	C C	C C	C C	C C	A C	A C	A C	C C	C C	A A	A C	A C	A C	C C	A C	A A	A C	A C	A C
8	8_33678699	0	33678699	T T	T T	T T	T T	T T	T T	C T	C C	T T	C T	T T	T T	C C	C T	T T	C T	C T	T T	C T	C T	C T	T T	T T	C T	T T	T T	C T	C T	T T	T T	T T	T T
8	8_33747805	0	33747805	A G	G G	G G	A G	G G	G G	A A	A A	G G	A A	A G	A G	A A	A G	G G	A G	A G	A A	A A	G G	A G	A G	A G	A A	G G	G G	A G	A G	G G	A G	G G	A G
8	8_33817056	0	33817056	T T	T T	C T	T T	T T	C T	T T	T T	C T	T T	T T	T T	T T	T T	C T	T T	T T	C T	T T	C C	T T	T T	T T	T T	C C	C C	T T	C T	C C	C T	T T	C T
8	8_33817537	0	33817537	0 0	A A	A A	G A	A A	A A	G A	G G	A A	G A	A A	G A	G G	G A	G A	G G	G A	G A	G A	A A	G A	G A	G A	0 0	A A	A A	G A	G A	A A	A A	A A	G A
8	8_34130998	0	34130998	G T	T T	T T	G T	T T	T T	G T	G G	T T	G T	T T	G T	G G	G T	G T	G T	G T	G T	G T	T T	G T	G T	G T	G T	T T	T T	G T	G T	T T	T T	T T	G T
8	8_34133515	0	34133515	C C	C C	A C	C C	C C	C C	C C	C C	C C	C C	C C	C C	C C	C C	C C	C C	C C	A C	C C	C C	C C	C C	C C	C C	A C	C C	C C	C C	C C	A C	C C	C C
8	8_34172420	0	34172420	A G	G G	G G	A G	G G	G G	A G	A A	G G	A G	G G	A G	A A	A G	A G	A G	A G	A G	A G	G G	A G	A G	A G	A G	G G	G G	A G	A G	G G	G G	G G	A G
8	8_34338901	0	34338901	C C	T C	C C	T C	T C	C C	C C	C C	C C	C C	T C	T C	C C	T C	C C	T C	T C	C C	C C	C C	T C	C C	C C	C C	C C	C C	C C	C C	C C	C C	C C	C C
8	8_34372022	0	34372022	C C	T C	C C	T C	T C	C C	C C	C C	C C	C C	T C	T C	C C	T C	C C	C C	T C	C C	C C	C C	T C	C C	C C	C C	C C	C C	C C	C C	C C	C C	C C	C C
8	8_34378991	0	34378991	C C	C A	C A	C A	A A	C A	C A	C C	C C	C A	A A	C A	C C	C A	C A	C A	C A	C A	A A	C A	C A	C A	C C	C A	C A	C C	C A	C A	C C	A A	C A	C A
8	8_34453313	0	34453313	T T	G T	T T	G T	G T	G T	T T	T T	T T	T T	G T	G T	T T	G T	G T	T T	G T	T T	G T	T T	G T	T T	T T	T T	G T	T T	T T	T T	T T	G T	T T	G T
8	8_34453712	0	34453712	T T	C T	T T	C T	C T	C T	T T	T T	T T	T T	C T	C T	T T	C T	C T	T T	C T	T T	C T	T T	C T	T T	T T	T T	C T	T T	T T	T T	T T	C T	T T	C T
8	8_34489626	0	34489626	T T	T T	C T	T T	C T	C T	C T	T T	T T	C T	C T	T T	T T	T T	C T	T T	T T	C T	C T	C T	T T	C T	T T	C T	T T	T T	C T	C T	T T	C T	C T	C T
8	8_34538463	0	34538463	T C	C C	C C	T C	C C	C C	T C	T T	C C	T C	C C	T C	T T	T C	T C	T C	T C	T C	C C	C C	T C	T C	T C	T C	C C	C C	T C	T C	C C	C C	C C	T C
8	8_34551657	0	34551657	G G	G G	A G	G G	G G	G G	G G	G G	G G	G G	G G	G G	G G	G G	G G	A G	G G	G G	G G	G G	G G	G G	G G	G G	G G	G G	G G	G G	G G	G G	G G	G G
8	8_34602294	0	34602294	G A	A A	A A	G A	A A	A A	G A	G G	A A	G A	A A	G A	G G	G A	G A	G A	G A	G A	A A	A A	G A	G A	G A	G A	A A	A A	G A	G A	A A	A A	A A	G A
8	8_34638031	0	34638031	G A	G A	G A	G G	G A	A A	G A	G G	A A	G A	G A	G G	G G	G G	G A	G A	G G	G A	G A	A A	G G	G A	G A	G A	G A	A A	G A	G A	A A	G A	A A	G A
8	8_34675913	0	34675913	G G	G G	T G	G G	G G	G G	G G	G G	G G	G G	G G	G G	G G	G G	G G	G G	G G	G G	T G	G G	G G	G G	G G	G G	T G	G G	G G	G G	G G	T G	G G	G G
8	8_34689439	0	34689439	G A	G A	G G	A A	G A	G G	G A	A A	G A	G A	G A	A A	A A	A A	G A	G A	A A	G A	G G	G A	A A	G A	G A	G A	G A	A A	G A	G A	A A	G G	G G	G A
8	8_34764386	0	34764386	T T	T T	C T	T T	C T	T T	C T	T T	C T	C T	C T	T T	T T	T T	T T	T T	T T	C T	C C	C C	T T	C T	T T	C T	C T	C T	C T	C T	C C	C T	C T	T T
8	8_34785351	0	34785351	T C	T C	C C	T T	T C	C C	T C	T T	C C	T C	T C	T T	T T	T T	T C	T C	T T	T C	C C	C C	T T	T C	T C	T C	C C	C C	T C	T C	C C	C C	C C	T C
8	8_34788729	0	34788729	A A	A A	G A	A A	A A	A A	A A	A A	G A	A A	A A	A A	A A	A A	A A	A A	A A	A A	G A	G A	A A	A A	A A	A A	G A	G A	A A	A A	G G	A A	A A	A A
8	8_34789270	0	34789270	A G	A G	G G	A A	A G	G G	A G	A A	G G	A G	A G	A A	A A	A A	A G	A A	A A	A G	G G	G G	A A	A G	A G	A G	G G	G G	A G	A G	G G	G G	G G	A G
8	8_34821720	0	34821720	C A	C A	A A	C C	C A	A A	C A	C C	A A	C A	C A	C C	C C	C C	C A	C C	C C	C A	A A	A A	C C	C A	C A	C A	A A	A A	C A	C A	A A	A A	A A	C A
8	8_34823432	0	34823432	C C	C C	T C	C C	C C	C C	C C	C C	T C	C C	C C	C C	C C	C C	C C	C C	C C	C C	T C	T C	C C	C C	C C	C C	T C	T C	C C	C C	T T	C C	C C	C C
8	8_34860842	0	34860842	C C	C C	C C	C C	C C	T C	C C	C C	C C	C C	C C	C C	C C	C C	T C	C C	C C	C C	C C	C C	C C	C C	C C	C C	C C	C C	C C	C C	C C	C C	C C	T C
8	8_34901335	0	34901335	C T	C T	C T	C C	C T	T T	C T	C T	T T	C T	C T	C C	C C	C C	C T	C C	C C	C T	T T	T T	C T	C T	C T	C T	T T	T T	C T	C T	T T	T T	T T	C T
8	8_34966723	0	34966723	T T	T T	T T	T T	T T	T T	T T	T T	T T	T T	T T	T T	T T	T T	T T	T T	T T	T T	T T	G T	T T	T T	T T	T T	T T	T T	T T	G T	T T	T T	T T	T T
8	8_34982846	0	34982846	A A	A A	A A	A A	A A	A A	A A	G A	A A	A A	A A	A A	A A	A A	A A	A A	A A	A A	A A	A A	G A	A A	A A	A A	A A	A A	A A	A A	A A	A A	A A	A A
8	8_34988337	0	34988337	A C	A C	A C	A A	A C	C C	A A	A C	C C	A A	A C	A A	A A	A A	A C	A A	A A	A C	C C	C C	A C	A C	A C	A C	C C	C C	A C	A C	C C	C C	C C	A C
8	8_35025281	0	35025281	C C	C C	C C	C C	T C	C C	C C	T C	T C	C C	T C	C C	C C	C C	C C	C C	C C	T C	T C	T T	T C	T C	C C	T C	T T	T T	T C	T C	T T	T T	T C	C C
8	8_35030511	0	35030511	G G	G G	G G	G G	G G	A G	G G	G G	A G	G G	G G	G G	G G	G G	A G	G G	G G	G G	A G	A A	G G	G G	G G	G G	A A	A A	G G	A G	A A	A G	G G	A G
8	8_35054940	0	35054940	C C	C C	C C	C C	C C	C C	C C	T C	C C	C C	C C	C C	C C	C C	C C	C C	C C	C C	C C	C C	T C	C C	C C	C C	C C	C C	C C	C C	C C	C C	C C	C C
8	8_35100113	0	35100113	G G	G A	G A	A A	A A	G A	A A	G A	G G	A A	A A	A A	A A	A A	A A	A A	A A	A A	G A	G G	G A	A A	G A	A A	G A	G A	A A	G A	G G	A A	G A	A A
8	8_35100261	0	35100261	C C	C A	C A	A A	C A	C A	A A	C A	C C	A A	C A	A A	A A	A A	A A	A A	A A	C A	C C	C C	C A	C A	C A	C A	C A	C C	C A	C A	C C	C A	C C	A A
8	8_35149962	0	35149962	C T	C T	C T	T T	T T	C T	T T	T T	C C	T T	T T	T T	T T	T T	T T	T T	T T	T T	C T	C C	T T	T T	C T	T T	C T	C C	T T	C T	C C	T T	C T	T T
8	8_35157163	0	35157163	C C	C C	C C	C C	C C	C C	C C	T C	C C	C C	C C	C C	C C	C C	C C	C C	C C	C C	C C	C C	T C	C C	C C	C C	C C	C C	C C	C C	C C	C C	C C	C C
8	8_35162891	0	35162891	A G	A G	A G	G G	G G	A A	G G	A G	A A	G G	G G	G G	G G	G G	A G	G G	G G	G G	A G	A A	A G	G G	A G	G G	A A	A A	G G	A G	A A	A G	A G	A G
8	8_35186826	0	35186826	A A	A A	A A	A A	A A	G A	A A	A A	G A	A A	A A	A A	A A	A A	G A	A A	A A	A A	A A	G A	A A	A A	A A	A A	G G	G A	A A	A A	G G	G A	A A	G A
8	8_35186939	0	35186939	C C	C C	C C	C C	C C	T C	C C	C C	T C	C C	C C	C C	C C	C C	T C	C C	C C	C C	C C	T C	C C	C C	C C	C C	T T	T C	C C	C C	T T	T C	C C	T C
8	8_35248451	0	35248451	G G	A G	G G	A G	A G	G G	G G	G G	G G	G G	G G	A G	G G	A G	A G	A G	G G	A G	G G	G G	A G	G G	A G	G G	G G	G G	A G	A G	G G	G G	G G	A G
8	8_35338328	0	35338328	A A	A A	G A	G A	A A	A A	G G	G G	A A	G G	G A	G A	G G	G A	A A	G A	G G	A A	A A	A A	G A	A A	A A	G A	A A	A A	A A	A A	A A	A A	A A	A A
8	8_35446838	0	35446838	G A	G A	G G	G A	A A	G A	G G	G G	G A	G G	G A	G A	G G	G A	A A	G A	G G	G A	G A	A A	G A	A A	G A	G A	A A	G A	A A	A A	A A	A A	G A	A A
8	8_35543312	0	35543312	G G	A G	G G	G G	A G	G G	G G	A G	A G	G G	G G	G G	G G	G G	G G	G G	G G	G G	A G	A G	A A	G G	G G	G G	A A	A G	G G	G G	A A	A G	G G	G G
8	8_35615181	0	35615181	A A	A A	C A	C A	A A	A A	C C	0 0	A A	C C	C A	0 0	C C	C A	A A	C A	C C	A A	C A	A A	A A	A A	A A	C A	C A	A A	A A	A A	A A	C A	A A	A A
8	8_35668845	0	35668845	A C	A C	A C	A C	A C	A C	A A	A C	A C	A A	A C	A C	A A	A C	A C	A C	A A	A C	C C	A C	A C	C C	C C	A C	A C	A A	C C	C C	A A	C C	C C	A C
8	8_35725364	0	35725364	C C	T C	C C	T C	T T	C C	C C	C C	C C	C C	T C	T C	C C	C C	C C	C C	C C	T C	T C	C C	T C	T C	T C	T C	C C	C C	T C	T C	C C	T C	T C	T C
8	8_35766840	0	35766840	T C	T C	T C	C C	C C	T C	C C	C C	T T	C C	C C	C C	C C	C C	C C	C C	C C	C C	C C	T C	C C	C C	T C	C C	T T	T C	C C	C C	T T	T C	T C	C C
8	8_35819395	0	35819395	G G	A A	A A	A A	A A	A A	A A	G A	G A	A A	A A	A A	A A	G A	G A	G A	A A	A A	A A	A A	G A	A A	A A	A A	G A	A A	G A	A A	0 0	A A	A A	A A
8	8_35850792	0	35850792	C C	C C	C C	T C	C C	C C	T T	T C	C C	T T	T C	T C	T T	T C	C C	T C	T T	C C	C C	C C	C C	C C	C C	T C	C C	C C	C C	C C	C C	C C	C C	C C
8	8_35850845	0	35850845	G G	A G	G G	A G	A G	G G	G G	G G	G G	G G	G G	A G	G G	G G	G G	G G	G G	A G	G G	G G	A G	G G	A G	G G	G G	G G	G G	A G	G G	G G	G G	A G
8	8_35957838	0	35957838	A A	G A	G A	G G	G A	A A	G G	G A	A A	G G	G A	G G	G G	G A	A A	G A	G G	G A	G A	G A	G A	G A	G A	G A	A A	A A	A A	G G	A A	A A	A A	G A
8	8_35977142	0	35977142	A G	A G	A A	A G	G G	A G	G G	G G	A A	G G	A A	A G	G G	A G	G G	G G	A G	G G	A G	A G	G G	G G	A G	A G	A G	A G	G G	G G	A A	A G	A G	G G
8	8_35987320	0	35987320	C C	T C	C C	T C	T T	C C	C C	C C	C C	C C	C C	T C	C C	C C	C C	T C	C C	T C	T C	C C	T C	T C	T C	C C	C C	C C	T C	T C	C C	C C	T C	T C
8	8_36021455	0	36021455	C T	T T	T T	T T	T T	T T	C C	C C	T T	C C	T T	T T	C C	C T	C T	C T	C T	C T	T T	T T	C T	T T	T T	C T	T T	T T	C T	T T	T T	T T	T T	T T
8	8_36059236	0	36059236	T G	T G	G G	T G	T T	G G	T T	T T	G G	T T	G G	T G	T T	T G	T G	T T	T G	T T	T G	G G	T T	T G	T G	T G	G G	G G	T T	T G	G G	G G	T G	T G
8	8_36067293	0	36067293	G T	G T	T T	G T	G G	T T	G G	G G	T T	G G	T T	G T	G G	G T	G T	G G	G T	G G	G T	T T	G G	G T	G T	G T	T T	T T	G G	G T	T T	T T	G T	G T
8	8_36068652	0	36068652	G A	G A	A A	G A	G G	A A	G G	G G	A A	G G	A A	G A	G G	G A	G A	G G	G A	G G	G A	A A	G G	G A	G A	G A	A A	A A	G G	G A	A A	A A	G A	G A
8	8_36069701	0	36069701	G A	G A	G A	A A	A A	G A	A A	A A	G A	A A	A A	A A	A A	A A	A A	A A	A A	A A	A A	A A	A A	A A	G A	A A	A A	A A	A A	A A	A A	A A	G A	A A
8	8_36069828	0	36069828	T G	T G	G G	T G	T T	G G	T T	T T	G G	T T	G G	T G	T T	T G	T G	T T	T G	T T	T G	G G	T T	T G	T G	T G	G G	G G	T T	T G	G G	G G	T G	T G
8	8_36069991	0	36069991	C T	C T	T T	C T	C C	T T	C C	C C	T T	C C	T T	C T	C C	C T	C T	C C	C T	C C	C T	T T	C C	C T	C T	C T	T T	T T	C C	C T	T T	T T	C T	C T
8	8_36072624	0	36072624	C T	C T	T T	C T	C C	T T	C C	C C	T T	C C	T T	C T	C C	T T	T T	C T	C T	C T	C T	T T	C C	C T	C T	C T	T T	T T	C T	C T	T T	T T	C T	C T
8	8_36079264	0	36079264	G A	G A	A A	G A	G G	A A	A A	A A	A A	A A	A A	G A	A A	A A	A A	G A	A A	G A	G A	G A	G A	G A	G A	A A	G A	G A	G A	G G	A A	G A	G A	G A
8	8_36093967	0	36093967	A G	A G	A A	A G	G G	A A	G G	G G	A A	G G	A A	A G	G G	A G	A G	G G	A G	G G	A G	A G	G G	A G	A G	A G	A G	A G	G G	G G	A A	A G	A G	A G
8	8_36100226	0	36100226	A A	A A	A A	A A	A A	A A	G G	G G	A A	G G	A A	A A	G G	G A	G A	G A	G A	G A	A A	G A	G A	A A	A A	G A	G A	G A	G A	G A	A A	G A	A A	A A
8	8_36176801	0	36176801	T C	T C	T C	C C	C C	T T	C C	C C	T C	C C	C C	C C	C C	T C	T T	T C	C C	T C	C C	C C	C C	C C	T C	C C	C C	C C	T C	C C	C C	C C	T C	T C
8	8_36176963	0	36176963	A G	A G	A G	G G	G G	A A	G G	G G	A G	G G	G G	G G	G G	A G	A A	A G	G G	A G	G G	A G	G G	A G	A G	G G	A G	A G	A G	A G	G G	A G	A G	A G
8	8_36259899	0	36259899	T C	T C	C C	T C	T T	C C	C C	C C	C C	C C	C C	T C	C C	C C	C C	T C	C C	T C	T C	C C	T C	T C	T C	C C	C C	C C	T C	T C	C C	C C	T C	T C
8	8_36291774	0	36291774	A A	A A	A A	A A	A A	A A	G G	G G	A A	G G	A A	A A	G G	A A	A A	A A	G A	A A	A A	A A	G A	A A	A A	G A	A A	A A	A A	A A	A A	A A	A A	A A
8	8_36319827	0	36319827	G A	G A	A A	G A	G G	A A	A A	A A	A A	A A	A A	G A	A A	A A	A A	G A	A A	G A	G A	G A	G A	G A	G A	A A	G A	G A	G A	G G	A A	G A	G A	G A
8	8_36329323	0	36329323	T T	T T	T T	T T	T T	T T	C C	C C	T T	C C	T T	T T	C C	T T	T T	T T	C T	T T	T T	T T	C T	T T	T T	C T	T T	T T	T T	T T	T T	T T	T T	T T
8	8_36404071	0	36404071	A G	A G	A G	A G	A A	G G	G G	G G	G G	G G	G G	A G	G G	G G	G G	A G	G G	A G	A G	A G	A G	A G	A G	G G	A G	A G	A G	A A	G G	A G	A G	A G
8	8_36512771	0	36512771	T C	T C	T C	C C	C C	T C	T T	T T	T T	T T	T C	C C	T T	T C	T C	T C	T C	T C	T C	T C	T C	C C	T C	T T	T C	T C	T C	C C	T T	T C	T C	C C
8	8_36512830	0	36512830	C C	C C	C C	C C	C C	C C	T T	T T	C C	T T	C C	C C	T T	C C	C C	C C	T C	C C	C C	C C	T C	C C	C C	T C	C C	C C	C C	C C	C C	C C	C C	C C
8	8_36532746	0	36532746	C T	C T	C T	T T	T T	C T	C C	C C	C C	C C	C T	T T	C C	C T	C T	C T	C T	C T	C T	C T	C T	T T	C T	C C	C T	C T	C T	T T	C C	C T	C T	T T
8	8_36533938	0	36533938	C C	C C	C C	C C	C C	C C	A A	A A	C C	A A	C C	C C	A A	C C	C C	C C	A C	C C	C C	C C	A C	C C	C C	A C	C C	C C	C C	C C	C C	C C	C C	C C
8	8_36534192	0	36534192	T C	T C	T C	T T	T T	T C	C C	C C	C C	C C	T C	T T	C C	T C	T C	T C	T C	T C	T C	T C	T C	T C	T C	C C	T C	T C	T C	T T	C C	T C	T C	T T
8	8_36545471	0	36545471	T C	T C	T C	C C	C C	T C	C C	C C	T T	C C	T C	C C	C C	T C	T C	T C	C C	T C	T C	T C	C C	C C	T C	T C	T C	T C	T C	C C	T T	T C	T C	C C
8	8_36596592	0	36596592	G A	G A	G A	G G	G G	A A	A A	A A	A A	A A	G A	G G	A A	G A	A A	G A	G A	G A	G A	G A	G A	G G	G A	A A	G A	G A	G A	G G	A A	G A	G A	G A
8	8_36632827	0	36632827	A C	A C	A C	A A	A A	C C	C C	C C	C C	C C	A C	A A	C C	A C	C C	A C	A C	A C	A C	A C	A C	A A	A C	C C	A C	A C	A C	A A	C C	A C	A C	A C
8	8_36634742	0	36634742	T T	T T	T T	T T	T T	T T	C C	C C	T T	C C	T T	T T	C C	T T	T T	T T	C T	T T	T T	T T	C T	T T	T T	C T	T T	T T	T T	T T	T T	T T	T T	T T
8	8_36756233	0	36756233	C C	C C	C C	C C	C C	C C	T T	T T	C C	T T	C C	C C	T T	C C	C C	C C	T C	C C	C C	C C	T C	C C	C C	T C	C C	C C	C C	C C	C C	C C	C C	C C
8	8_36757303	0	36757303	G G	G G	G G	G G	G G	G G	A A	A A	G G	A A	G G	G G	A A	G G	G G	G G	A G	G G	G G	G G	A G	G G	G G	A G	G G	G G	G G	G G	G G	G G	G G	G G
8	8_36764270	0	36764270	A G	A G	A G	A A	A A	G G	G G	G G	G G	G G	A G	A A	G G	A G	G G	A G	A G	A G	A G	A G	A G	A G	A G	G G	A G	A G	A G	A A	G G	A G	A G	A G
8	8_36826907	0	36826907	C C	C C	C C	C C	C C	C C	A A	A A	C C	A A	C C	C C	A A	C C	C C	C C	A C	C C	C C	C C	A C	C C	C C	A C	C C	C C	C C	C C	C C	C C	C C	C C
8	8_36833179	0	36833179	G T	G T	G T	T T	T T	G G	T T	T T	G G	T T	G T	T T	T T	T T	G T	T T	T T	T T	G T	G T	T T	T T	G T	G T	G T	G T	T T	T T	G G	G T	G T	G T
8	8_36862111	0	36862111	G A	G A	G A	A A	A A	G A	A A	A A	G A	A A	A A	A A	A A	A A	A A	A A	A A	A A	A A	A A	A A	A A	G A	A A	A A	A A	A A	A A	A A	A A	G A	A A
8	8_36959892	0	36959892	G G	G G	G G	G G	G G	G G	A A	A A	G G	A A	G G	G G	A A	G G	G G	G G	A G	G G	G G	G G	A G	G G	G G	A G	G G	G G	G G	G G	G G	G G	G G	G G
8	8_37002327	0	37002327	C C	C C	C C	C C	C C	C C	T T	T T	C C	T T	C C	C C	T T	C C	C C	C C	T C	C C	C C	C C	T C	C C	C C	T C	C C	C C	C C	C C	C C	C C	C C	C C
8	8_37013840	0	37013840	T T	T T	T T	T T	T T	T T	C C	C C	T T	C C	T T	T T	C C	T T	T T	T T	C T	T T	T T	T T	C T	T T	T T	C T	T T	T T	T T	T T	T T	T T	T T	T T
8	8_37088035	0	37088035	T T	C T	C T	C C	C C	T T	T T	T T	T T	T T	C T	C C	T T	C T	T T	C T	C T	C T	C T	C T	C T	C C	C T	T T	C T	C T	C T	C C	T T	C T	C T	C T
8	8_37100299	0	37100299	T T	C T	C T	C C	C C	T T	T T	T T	T T	T T	C T	C C	T T	C T	T T	C T	C T	C T	C T	C T	C T	C C	C T	T T	C T	C T	C T	C C	T T	C T	C T	C T
8	8_37153931	0	37153931	G G	A G	A G	A A	A A	G G	G G	G G	G G	G G	A G	A A	G G	A G	G G	A G	A G	A G	A G	A G	A G	A A	A G	G G	A G	A G	A G	A A	G G	A G	A G	A G
8	8_37257830	0	37257830	C C	C C	C C	C C	C C	A C	A A	A A	A C	A A	A C	C C	A A	A C	A A	A C	A C	A C	A C	A C	A C	C C	C C	A A	A C	A C	A C	C C	A A	A C	C C	A C
8	8_37289319	0	37289319	A A	A A	A A	A A	A A	A A	G G	G G	A A	G G	A A	A A	G G	A A	A A	A A	G A	A A	A A	A A	G A	A A	A A	G A	A A	A A	A A	A A	A A	A A	A A	A A
8	8_37328060	0	37328060	G T	T T	T T	T T	G T	T T	G G	G G	T T	G G	T T	T T	G G	T T	T T	T T	G T	T T	T T	T T	G T	G T	T T	G T	T T	T T	G T	T T	T T	T T	G T	T T
8	8_37331867	0	37331867	T T	T T	T T	T T	T T	T T	T T	T T	T T	T T	T T	T T	T T	T T	T T	T T	T T	T T	T T	C T	T T	C T	T T	T T	T T	C T	T T	C T	T T	T T	T T	T T
8	8_37371343	0	37371343	C C	T C	T C	T C	T C	C C	C C	C C	C C	C C	C C	T C	C C	C C	C C	T C	C C	T C	T C	C C	T C	C C	T C	C C	T C	C C	C C	T C	C C	T C	C C	T C
8	8_37420192	0	37420192	A G	G G	G G	G G	G G	G G	A A	A A	G G	A A	G G	G G	A A	G G	G G	G G	A G	G G	G G	G G	A G	G G	G G	A G	G G	G G	G G	G G	G G	G G	G G	G G
8	8_37439271	0	37439271	T T	C T	C T	C T	C T	T T	T T	T T	T T	T T	T T	C T	T T	C T	C T	C C	T T	C C	C T	T T	C T	C T	C T	T T	C T	C T	C T	C T	T T	C T	T T	C T
8	8_37456491	0	37456491	G A	G G	G G	G G	G A	G A	A A	A A	G A	A A	G A	G G	A A	G G	G A	G G	G A	G G	G A	G A	G A	G A	G G	A A	G A	G A	G A	G G	A A	G A	G A	G A
8	8_37575601	0	37575601	C C	A C	A C	A C	A C	C C	C C	C C	C C	C C	C C	A C	C C	C C	C C	A C	C C	A C	A C	C C	A C	C C	A C	C C	A C	C C	C C	A C	C C	A C	C C	A C
8	8_37602458	0	37602458	C C	C C	C C	C C	C C	C C	C C	T C	C C	C C	C C	C C	C C	C C	C C	C C	C C	C C	C C	C C	T C	C C	C C	C C	C C	C C	C C	C C	C C	C C	C C	C C
8	8_37629004	0	37629004	T G	T G	T G	T T	T G	G G	T T	T T	G G	T T	T G	T T	T T	T G	G G	T G	T T	T G	T G	T G	T T	T G	T G	T G	T G	T G	G G	T T	G G	T G	G G	T G
8	8_37724203	0	37724203	G G	A G	A G	A A	A G	G G	G G	G G	G G	G G	A G	A A	G G	A G	G G	A G	A G	A G	A G	G G	A G	G G	A G	G G	A G	G G	G G	A G	G G	A G	G G	A G
8	8_37791469	0	37791469	A C	C C	C C	C C	C C	C C	A A	A A	C C	A A	C C	C C	A A	C C	C C	C C	A C	C C	C C	C C	A C	C C	C C	A C	C C	C C	C C	C C	C C	C C	C C	C C
8	8_37801924	0	37801924	G T	T T	T T	T T	T T	T T	G G	G G	G T	G G	T T	T T	G G	T T	T T	T T	G T	T T	T T	G G	G T	T T	T T	G T	G T	G G	T T	G T	G G	T T	T T	T T
8	8_37856902	0	37856902	A A	A A	A A	C A	C A	C A	A A	A A	A A	A A	C C	C A	A A	C C	C C	C A	C A	C A	C A	A A	A A	C C	A A	C A	A A	A A	C C	A A	A A	C A	C A	C A
8	8_37874823	0	37874823	G G	G G	G G	G G	G G	G G	G G	G G	A G	G G	G G	G G	G G	G G	G G	G G	G G	G G	G G	A G	G G	G G	G G	G G	A G	A A	G G	G G	A A	G G	G G	G G
8	8_37916695	0	37916695	A C	C C	C C	C C	C C	C C	A A	A A	A C	A A	C C	C C	A A	C C	C C	C C	A C	C C	C C	A A	A C	C C	C C	A C	A C	A A	C C	A C	A A	C C	C C	C C
8	8_37920363	0	37920363	G A	G A	G A	G A	G A	A A	G G	G G	G A	G G	A A	G A	G G	A A	A A	G A	G A	G A	G A	G G	G G	A A	G A	G A	G G	G G	A A	G G	G G	G A	A A	G A
8	8_37921228	0	37921228	T C	T C	T C	T C	T C	C C	T T	T T	T C	T T	C C	T C	T T	C C	C C	T C	T C	T C	T C	T T	T T	C C	T C	T C	T T	T T	C C	T T	T T	T C	C C	T C
8	8_37921297	0	37921297	A G	A G	A G	A G	A G	G G	A A	A A	A G	A A	G G	A G	A A	G G	G G	A G	A G	A G	A G	A A	A A	G G	A G	A G	A A	A A	G G	A A	A A	A G	G G	A G
8	8_37921639	0	37921639	C T	C T	C T	C T	C T	T T	C C	C C	C T	C C	T T	C T	C C	T T	T T	C T	C T	C T	C T	C C	C C	T T	C T	C T	C C	C C	T T	C C	C C	C T	T T	C T
8	8_37925732	0	37925732	G A	A A	A A	G A	A A	A A	G G	G G	G A	G G	A A	G A	G G	A A	A A	G A	G A	G A	A A	G A	G A	A A	G A	G A	G G	G G	A A	G A	G G	G A	A A	G A
8	8_37944491	0	37944491	T T	C T	C T	T T	C T	T T	T T	T T	T T	T T	T T	T T	T T	T T	T T	T T	T T	T T	C T	C T	C T	T T	T T	T T	T T	T T	T T	C T	T T	T T	T T	T T
8	8_37956916	0	37956916	A G	G G	G G	G G	G G	G G	A A	A A	G G	A A	G G	G G	A A	G G	G G	G G	A G	G G	G G	G G	A G	G G	G G	A G	G G	G G	G G	G G	G G	G G	G G	G G
8	8_38004888	0	38004888	T T	T T	T T	C T	T T	T T	T T	T T	T T	T T	T T	C T	T T	T T	T T	C T	T T	C T	T T	T T	T T	T T	C T	T T	C T	T T	T T	C T	T T	C T	T T	C T
8	8_38081267	0	38081267	G A	A A	A A	A A	A A	A A	G G	G G	A A	G G	A A	A A	G G	A A	A A	A A	G A	A A	A A	A A	G A	A A	A A	G A	A A	A A	A A	A A	A A	A A	A A	A A
8	8_38093015	0	38093015	A G	G G	G G	G G	G G	G G	A A	A A	G G	A A	G G	G G	A A	G G	G G	G G	A G	G G	G G	G G	A G	G G	G G	A G	G G	G G	G G	G G	G G	G G	G G	G G
8	8_38093111	0	38093111	A G	G G	G G	G G	G G	G G	A A	A A	G G	A A	G G	G G	A A	G G	G G	G G	A G	G G	G G	G G	A G	G G	G G	A G	G G	G G	G G	G G	G G	G G	G G	G G
8	8_38093194	0	38093194	T C	C C	C C	C C	C C	C C	T T	T T	C C	T T	C C	C C	T T	C C	C C	C C	T C	C C	C C	C C	T C	C C	C C	T C	C C	C C	C C	C C	C C	C C	C C	C C
8	8_38096254	0	38096254	A C	C C	C C	C C	C C	C C	A A	A A	C C	A A	C C	C C	A A	C C	C C	C C	A C	C C	C C	C C	A C	C C	C C	A C	C C	C C	C C	C C	C C	C C	C C	C C
8	8_38098403	0	38098403	G G	G G	G G	A G	G G	G G	G G	G G	A G	G G	A G	A G	G G	A G	G G	G G	A G	G G	G G	A G	G G	A G	G G	G G	A G	A A	G G	G G	A A	G G	G G	G G
8	8_38106348	0	38106348	C T	T T	T T	T T	C T	T T	C C	C C	T T	C C	C T	T T	C C	T T	T T	T T	C T	T T	C T	T T	C T	C T	T T	C C	T T	T T	C T	T T	T T	C T	C T	T T
8	8_38139572	0	38139572	T C	C C	C C	C C	C C	C C	T T	T T	C C	T T	C C	C C	T T	C C	C C	C C	T C	C C	C C	C C	T C	C C	C C	T C	C C	C C	C C	C C	C C	C C	C C	C C
8	8_38172826	0	38172826	G A	A A	A A	A A	A A	A A	G G	G G	A A	G G	A A	A A	G G	A A	A A	A A	G A	A A	A A	A A	G A	A A	A A	G G	G A	A A	A A	A A	A A	G G	A A	A A
8	8_38195773	0	38195773	A G	A G	A G	G G	A G	A A	G G	G G	A G	G G	G G	G G	G G	G G	A G	G G	G G	G G	G G	G G	G G	A G	A G	G G	G G	G G	A G	G G	G G	G G	A A	A G
8	8_38196245	0	38196245	C C	C C	C C	T T	C C	C C	C C	C C	C C	C C	T C	T T	C C	T T	T C	T T	T C	T T	C C	C C	C C	T C	T C	C C	C C	C C	T C	T C	C C	C C	C C	T C
8	8_38432593	0	38432593	T T	T T	T T	T T	T T	T T	T T	T T	T T	T T	T T	T T	T T	T T	T T	T T	T T	T T	T T	T T	T T	T T	T T	T T	T T	T T	T T	T T	G T	T T	T T	T T
8	8_38444026	0	38444026	T C	T T	T C	C C	T C	T T	T T	T C	T C	T T	T C	C C	T T	T C	T T	T C	T C	T C	T T	C C	T C	C C	T C	T T	T C	C C	T C	C C	C C	T T	T C	T C
8	8_38463436	0	38463436	C T	C C	C T	C T	C T	C C	C C	C C	C T	C C	T T	C T	C C	T T	C T	C T	C T	C T	C T	T T	C C	T T	C C	C T	C T	T T	T T	C T	T T	C T	C T	C C
8	8_38553767	0	38553767	T T	T T	T T	C C	T T	T T	T T	C T	T T	T T	C T	C C	T T	C T	T T	C T	C T	C T	T T	T T	C T	T T	C T	T T	T T	T T	T T	C T	T T	T T	T T	C T
8	8_38570674	0	38570674	G G	G G	G G	A A	G G	G G	G G	A G	G G	G G	A G	A A	G G	A G	G G	A G	A G	A G	G G	G G	A G	G G	A G	G G	G G	G G	G G	A G	G G	G G	G G	A G
8	8_38581431	0	38581431	A A	G A	G A	A A	G A	G A	G G	G A	A A	G G	A A	A A	G G	A A	G A	A A	G A	A A	G A	A A	G A	A A	A A	G A	G A	A A	A A	A A	A A	G A	A A	G A
8	8_38581566	0	38581566	G G	G G	G G	A G	G G	G G	G G	A G	G G	G G	G G	A G	G G	G G	G G	A G	G G	A G	G G	G G	A G	G G	A G	G G	G G	G G	G G	A G	G G	G G	G G	A G
8	8_38581601	0	38581601	T T	T T	T T	C T	T T	T T	T T	C T	T T	T T	T T	C T	T T	T T	T T	C T	T T	C T	T T	T T	C T	T T	C T	T T	T T	T T	T T	C T	T T	T T	T T	C T
8	8_38589906	0	38589906	A A	G A	G A	G A	G A	G A	G G	G G	A A	G G	A A	G A	G G	A A	G A	G A	G A	G A	G A	A A	G G	A A	G A	G A	G A	A A	A A	G A	A A	G A	A A	G G
8	8_38656972	0	38656972	A A	G A	A A	G A	G A	A A	A A	A A	A A	A A	G A	G A	A A	G A	A A	A A	G A	A A	G A	A A	G A	A A	A A	A A	A A	A A	A A	A A	A A	A A	A A	A A
8	8_38715756	0	38715756	C C	C C	C C	T C	C C	C C	T T	T T	C C	T T	T C	T C	T T	C C	C C	T C	T C	T C	T C	T C	T C	C C	T C	T T	T C	T C	C C	T T	C C	T T	C C	T C
8	8_38738590	0	38738590	C C	T C	T C	T C	T C	C C	C C	C C	C C	C C	T C	T C	C C	T C	C C	C C	T C	C C	T C	C C	T C	C C	C C	C C	C C	C C	C C	C C	C C	C C	C C	C C
8	8_38832157	0	38832157	C C	C C	C C	C C	C C	C C	C C	C C	A C	C C	A C	C C	C C	A C	A C	A C	C C	A C	A C	A C	C C	C C	C C	A C	A C	A C	A C	C C	A A	A C	C C	C C
8	8_38851571	0	38851571	C C	C C	C C	T C	C C	C C	C C	T C	C C	C C	C C	T C	C C	C C	C C	T C	C C	T C	C C	C C	T C	C C	T C	C C	C C	C C	C C	T C	C C	C C	C C	T C
8	8_38853229	0	38853229	G G	G G	G G	A G	G G	G G	G G	A G	G G	G G	G G	A G	G G	G G	G G	A G	G G	A G	G G	G G	A G	G G	A G	G G	G G	G G	G G	A G	G G	G G	G G	A G
8	8_38855178	0	38855178	G G	G G	G G	A G	G G	G G	A A	A A	G G	A A	A G	A G	A A	G G	G G	A G	A G	A G	A G	A G	A G	A G	A G	A A	A G	A G	G G	A A	G G	A A	G G	A G
8	8_39045529	0	39045529	A G	G G	G G	G G	G G	G G	G G	G G	G G	G G	G G	G G	G G	G G	G G	G G	G G	G G	G G	A G	G G	G G	G G	G G	A G	G G	G G	A G	G G	A G	G G	G G
8	8_39107591	0	39107591	C C	C C	T C	C C	C C	T C	C C	C C	C C	C C	C C	C C	C C	C C	T C	C C	C C	C C	C C	T C	C C	C C	C C	C C	C C	C C	C C	T C	C C	C C	C C	T C
8	8_39108957	0	39108957	C T	T T	C T	T T	T T	C T	C C	C T	C T	C C	C T	T T	C C	T T	C T	T T	C T	T T	C T	C C	T T	T T	T T	C C	C C	C T	T T	C T	C C	C C	T T	C T
8	8_39142226	0	39142226	G G	G G	G G	G G	G G	G G	G G	G G	G G	G G	G G	G G	G G	G G	G G	G G	G G	G G	G G	G G	G G	A G	G G	G G	G G	G G	G G	G G	G G	G G	G G	G G
8	8_39163240	0	39163240	G A	G A	G A	G A	G A	G A	A A	G A	G A	A A	A A	G A	A A	G A	G A	G G	A A	G G	A A	A A	G A	A A	G G	A A	A A	A A	G A	G A	A A	A A	G A	G A
8	8_39163590	0	39163590	T T	T T	T T	T T	T T	T T	T T	T T	C T	T T	C T	T T	T T	T T	T T	T T	T T	T T	C T	C T	T T	T T	T T	C T	C T	C T	T T	T T	C C	C T	T T	T T
8	8_39250176	0	39250176	G G	G G	G G	G G	G G	G G	T T	T G	G G	T T	G G	G G	T T	G G	G G	G G	T G	G G	G G	G G	G G	G G	G G	T G	G G	G G	G G	G G	G G	G G	G G	G G
8	8_39321066	0	39321066	T C	0 0	T C	T C	T C	T C	C C	T C	T C	C C	C C	T C	C C	T C	T C	T T	C C	T T	C C	C C	T C	C C	T T	C C	C C	C C	T C	T C	C C	C C	T C	T C
8	8_39346486	0	39346486	T C	C C	T C	C C	C C	T C	C C	C C	C C	C C	C C	C C	C C	C C	T C	C C	C C	C C	C C	T C	C C	C C	C C	C C	T C	C C	C C	T C	C C	T C	C C	T C
8	8_39391520	0	39391520	A G	A G	G G	A G	A G	G G	G G	G G	A G	G G	A A	A G	G G	A G	G G	G G	A G	G G	A A	A A	A G	A G	G G	A G	A G	A G	A G	A G	A A	A G	A G	G G
8	8_39400049	0	39400049	A A	A A	G A	A A	A A	G A	A A	A A	A A	A A	A A	A A	A A	A A	G A	A A	A A	A A	A A	A A	A A	A A	A A	A A	G A	G A	A A	A A	A A	G A	A A	G A
8	8_39473041	0	39473041	T C	T C	T C	T C	T C	T C	C C	T C	T C	C C	C C	T C	C C	T C	T C	T T	C C	T T	C C	C C	T C	C C	T T	C C	C C	C C	T C	T C	C C	C C	T C	T C
8	8_39474433	0	39474433	T C	T C	T C	T T	T C	T C	C C	T C	T C	C C	T C	T T	C C	T T	T C	T T	T C	T T	T C	C C	T C	T C	T T	C C	C C	C C	T T	T C	C C	C C	T T	T C
8	8_39492931	0	39492931	A G	G G	A G	A G	G G	A G	G G	G G	A G	G G	A A	A G	G G	A G	A G	G G	A G	G G	A G	A G	G G	A A	G G	A G	A A	A A	A G	G G	A A	A A	A G	A G
8	8_39509944	0	39509944	C T	C T	C T	C T	C T	C T	C C	C C	C T	C C	T T	C T	C C	C T	C T	C C	C T	C C	C T	T T	C T	T T	C C	C T	T T	T T	C T	C T	T T	T T	C T	C T
8	8_39650313	0	39650313	A A	A A	A A	G A	A A	A A	A A	A A	A A	A A	G A	G A	A A	G A	A A	A A	G A	A A	A A	A A	A A	G A	A A	A A	A A	A A	G A	A A	A A	A A	G A	A A
8	8_39653707	0	39653707	C C	C C	C C	T C	C C	C C	C C	C C	C C	C C	T C	T C	C C	T C	C C	C C	T C	C C	C C	C C	C C	T C	C C	C C	C C	C C	T C	C C	C C	C C	T C	C C
8	8_39653761	0	39653761	T T	0 0	T T	C T	T T	T T	T T	T T	T T	T T	C T	C T	T T	C T	T T	T T	C T	T T	T T	T T	T T	C T	T T	T T	T T	T T	C T	T T	T T	T T	C T	T T
8	8_39653906	0	39653906	C C	T C	T C	C C	T C	T C	C C	C C	C C	C C	C C	C C	C C	C C	T C	C C	C C	C C	C C	T C	T C	C C	C C	C C	T C	T C	C C	T C	C C	T C	C C	T C
8	8_39707680	0	39707680	G A	A A	A A	A A	A A	A A	A A	A A	A A	A A	A A	A A	A A	A A	A A	A A	A A	A A	A A	A A	A A	A A	A A	A A	A A	A A	A A	A A	A A	A A	A A	A A
8	8_39724850	0	39724850	T T	T T	T T	G T	T T	T T	T T	G T	T T	T T	T T	G T	T T	G T	G T	G G	T T	G G	T T	T T	G T	T T	G T	T T	T T	T T	G T	G T	T T	T T	T T	G T
8	8_39787151	0	39787151	T T	C T	T T	C C	C T	T T	C C	C C	T T	C C	C T	C C	C C	C C	C T	C C	C C	C C	C T	T T	C C	C T	C T	C T	T T	C T	C C	C T	T T	T T	C T	C T
8	8_39845220	0	39845220	C C	C C	C C	T C	C C	C C	T T	T C	C C	T T	T C	T C	T T	T C	C C	C C	T T	C C	C C	C C	C C	T C	C C	T C	C C	T C	T C	C C	C C	C C	T C	C C
8	8_39869638	0	39869638	C C	C C	C C	T C	C C	C C	T T	T C	C C	T T	T C	T C	T T	T C	C C	C C	T T	C C	C C	C C	C C	T C	C C	T C	C C	T C	T C	C C	C C	C C	T C	C C
8	8_39872631	0	39872631	G G	G G	G G	A G	G G	G G	A A	A G	G G	A A	A G	A G	A A	A G	G G	G G	A A	G G	G G	G G	G G	A G	G G	A G	G G	A G	A G	G G	G G	G G	A G	G G
8	8_39988864	0	39988864	G G	G G	G G	A G	G G	G G	G G	A G	G G	G G	G G	A G	G G	A G	A G	A A	G G	A A	G G	G G	A G	G G	A G	G G	G G	G G	A G	A G	G G	G G	G G	A G
8	8_39990997	0	39990997	G G	G G	A G	G G	G G	G G	G G	G G	G G	G G	G G	G G	G G	G G	G G	G G	G G	G G	G G	G G	G G	G G	G G	G G	A G	G G	G G	G G	G G	A G	G G	G G
8	8_40135124	0	40135124	A G	G G	G G	A G	G G	G G	G G	A G	G G	G G	G G	A G	G G	A G	A G	A A	G G	A A	G G	G G	A G	G G	A G	G G	G G	G G	A G	A G	G G	G G	G G	A G
8	8_40155825	0	40155825	C A	C A	C A	C A	C A	C A	C C	C A	C A	C C	C A	C A	C C	C A	A A	A A	C C	A A	A A	A A	A A	C A	C A	C A	A A	C A	C A	A A	A A	A A	C C	A A
8	8_40183528	0	40183528	A A	0 0	A A	G A	A A	A A	A A	G A	A A	A A	A A	G A	A A	G A	G A	G G	A A	G G	A A	A A	G A	A A	G A	A A	A A	A A	G A	G A	A A	A A	A A	G A
8	8_40349977	0	40349977	A A	A A	A C	C C	A A	A C	C C	C C	A A	C C	C C	C C	C C	C C	C C	C C	C C	C C	C C	A C	A C	C C	A C	C C	A A	A C	C C	C C	A A	A C	A C	C C
8	8_40351067	0	40351067	T T	T T	T G	G G	T T	T G	G G	G G	T T	G G	G G	G G	G G	G G	G G	G G	G G	G G	G G	T G	T G	G G	T G	G G	T T	T G	G G	G G	T T	T G	T G	G G
8	8_40354249	0	40354249	T T	T T	T G	G G	T T	T G	G G	G G	T T	G G	G G	G G	G G	G G	G G	G G	G G	G G	G G	T G	T G	G G	T G	G G	T T	T G	G G	G G	T T	T G	T G	G G
8	8_40354915	0	40354915	G G	G G	G A	A A	G G	G A	A A	A A	G G	A A	A A	A A	A A	A A	A A	A A	A A	A A	A A	G A	G A	A A	G A	A A	G G	G A	A A	A A	G G	G A	G A	A A
8	8_40361890	0	40361890	A A	A G	A G	G G	A G	A G	G G	G G	A A	G G	G G	G G	G G	G G	G G	G G	G G	G G	G G	A G	G G	G G	A G	G G	A A	A G	G G	G G	A A	A G	A G	G G
8	8_40363289	0	40363289	C C	C C	C T	T T	C C	C T	T T	T T	C C	T T	T T	T T	T T	T T	T T	T T	T T	T T	T T	C T	C T	T T	C T	T T	C C	C T	T T	T T	C C	C T	C T	T T
8	8_40367229	0	40367229	A A	A A	A G	G G	A A	A G	G G	G G	A A	G G	G G	G G	G G	G G	G G	G G	G G	G G	G G	A G	A G	G G	A G	G G	A A	A G	G G	G G	A A	A G	A G	G G
8	8_40402407	0	40402407	T T	T T	T G	G G	T T	T G	G G	G G	T T	G G	G G	G G	G G	G G	G G	G G	G G	G G	T G	T G	T G	G G	T G	G G	T T	T G	G G	G G	T T	T G	T G	G G
8	8_40414009	0	40414009	C T	T T	T T	T T	T T	T T	T T	T T	T T	T T	T T	T T	T T	T T	T T	T T	T T	T T	T T	T T	T T	T T	T T	T T	T T	T T	T T	T T	T T	T T	T T	T T
8	8_40533148	0	40533148	A A	A A	A A	G A	A A	A A	A A	G A	A A	A A	A A	G A	A A	G A	G A	G G	A A	G G	G A	A A	G A	A A	G A	A A	A A	A A	G A	G A	A A	A A	A A	G A
8	8_40677358	0	40677358	A A	A A	A A	G A	A A	A A	A A	G A	A A	A A	A A	G A	A A	G A	G A	G G	A A	G G	G A	A A	G A	A A	G A	A A	A A	A A	G A	G A	A A	A A	A A	G A
8	8_40698537	0	40698537	T T	T T	T T	C T	T T	T T	T T	C T	T T	T T	T T	C T	T T	C T	C T	C C	T T	C C	C T	T T	C T	T T	C T	T T	T T	T T	C T	C T	T T	T T	T T	C T
8	8_40829165	0	40829165	T C	T C	T C	T C	T C	T C	C C	T C	T C	C C	T C	T C	C C	T C	T C	T T	C C	T T	T T	C C	T C	C C	T T	T C	C C	T C	T C	T C	C C	T C	T C	T C
8	8_40835755	0	40835755	C C	C C	C C	T C	C C	C C	T T	T C	C C	T T	T C	T C	T T	T C	C C	C C	T T	C C	C C	C C	C C	T C	C C	T C	C C	C C	T C	C C	C C	C C	T C	C C
8	8_40890548	0	40890548	G A	G A	G A	G A	G A	G A	A A	G A	G A	A A	G A	G A	A A	G A	G A	G G	A A	G G	G G	A A	G A	A A	G G	G A	A A	G A	G A	G A	A A	G A	G A	G A
8	8_40982641	0	40982641	T T	T T	T T	T T	T T	T T	T T	T T	G T	T T	T T	T T	T T	T T	T T	T T	T T	T T	T T	G T	T T	G T	T T	T T	G T	G T	T T	T T	G G	T T	T T	T T
8	8_40982737	0	40982737	G G	G G	G G	G G	G G	G G	G G	G G	A G	G G	G G	G G	G G	G G	G G	G G	G G	G G	G G	A G	G G	A G	G G	G G	A G	A G	G G	G G	A A	G G	G G	G G
8	8_41011558	0	41011558	G A	G A	G A	G A	G A	G A	A A	G A	G G	A A	A A	G A	A A	G A	G A	G G	A A	G G	G A	G A	G A	G A	G G	A A	G A	G A	G A	G A	G G	A A	G A	G A
8	8_41055357	0	41055357	C T	T T	C T	T T	T T	C T	T T	T T	C T	T T	C T	T T	T T	T T	C T	T T	T T	T T	C T	C C	T T	T T	T T	C T	C T	C C	T T	C T	C C	C T	T T	C T
8	8_41068181	0	41068181	C T	C T	C T	C T	C T	C T	T T	C T	C T	T T	T T	C T	T T	C T	C T	C C	T T	C C	C T	T T	C T	T T	C C	T T	T T	T T	C T	C T	T T	T T	C T	C T
8	8_41075758	0	41075758	C T	C T	C T	T T	C T	C T	T T	T T	C T	T T	C T	T T	0 0	T T	C T	T T	T T	T T	C T	C C	C T	T T	T T	C T	C T	C C	T T	C T	C C	C T	T T	C T
8	8_41110754	0	41110754	A G	A A	A A	G G	A A	A G	G G	G G	A G	G G	A G	G G	G G	G G	G G	G G	G G	G G	A A	G G	A G	A G	A G	A G	A G	A G	A G	G G	G G	A A	A A	G G
8	8_41114626	0	41114626	T C	C C	C C	T T	C C	T C	C C	T C	C C	C C	T C	T T	C C	T T	T T	T T	T C	T T	C C	T T	T C	T C	T C	C C	T C	C C	T C	T T	T T	C C	C C	T T
8	8_41351747	0	41351747	T T	T T	T T	C T	T T	T T	C C	C C	T T	C C	T T	C T	C C	C T	C T	C C	C T	C C	T T	C T	C T	T T	C T	C T	T T	T T	C T	C C	T T	T T	T T	C T
8	8_41351829	0	41351829	G G	G G	G G	A G	G G	G G	A A	A A	G G	A A	G G	A G	A A	A G	A G	A A	A G	A A	G G	A G	A G	G G	A G	A G	G G	G G	A G	A A	G G	G G	G G	A G
8	8_41395378	0	41395378	C C	C C	C C	T C	C C	C C	T T	T T	C C	T T	C C	T C	T T	T C	T C	T T	T C	T T	C C	T C	T C	C C	T C	T C	C C	C C	T C	T T	C C	C C	C C	T C
8	8_41416236	0	41416236	G G	G G	G G	G G	G G	G G	G G	G G	G G	G G	T G	G G	G G	G G	G G	G G	G G	G G	T G	G G	G G	G G	G G	T G	G G	G G	G G	G G	G G	T G	G G	G G
8	8_41644642	0	41644642	C C	C C	C C	T C	C C	C C	T T	T T	C C	T T	C C	T C	T T	T C	T C	T T	T C	T T	C C	T T	T C	C C	T C	T C	T C	C C	T C	T T	T T	C C	C C	T C
8	8_41677215	0	41677215	C C	A C	C C	C C	A C	C C	C C	C C	C C	C C	A C	C C	C C	C C	C C	C C	C C	C C	A C	C C	A C	A C	C C	A C	C C	C C	C C	C C	C C	A C	C C	C C
8	8_41677419	0	41677419	G G	G G	G G	T G	G G	G G	T T	T T	G G	T T	G G	T G	T T	T G	T G	T T	T G	T T	G G	T G	T G	G G	T G	T G	G G	G G	T G	T T	G G	G G	G G	T G
8	8_41688194	0	41688194	C C	T C	C C	C C	T C	C C	C C	C C	C C	C C	T C	C C	C C	C C	C C	C C	C C	C C	T C	C C	T C	T C	C C	T C	C C	C C	C C	C C	C C	T C	C C	C C
8	8_41731087	0	41731087	A A	A A	A A	G A	A A	A A	G G	G G	A A	G G	A A	G A	G G	G A	G A	G G	G A	G G	A A	G A	G A	A A	G A	G A	A A	A A	G A	G G	A A	A A	A A	G A
8	8_41751084	0	41751084	A G	G G	G G	G G	G G	A G	G G	G G	A G	G G	G G	G G	G G	G G	A G	G G	G G	G G	A G	G G	G G	G G	G G	G G	G G	A A	G G	G G	G G	G G	G G	A G
8	8_41758167	0	41758167	C C	C C	C C	T C	C C	C C	T T	T T	C C	T T	C C	T C	T T	T C	T C	T T	T C	T T	C C	T T	T C	C C	T C	T C	T C	C C	T C	T T	T T	C C	C C	T C
8	8_41758212	0	41758212	A A	A A	A A	G A	A A	A A	G G	G G	A A	G G	A A	G A	G G	G A	G A	G G	G A	G G	A A	G A	G A	A A	G A	G A	A A	A A	G A	G G	A A	A A	A A	G A
8	8_41810441	0	41810441	C C	C C	C C	T C	C C	C C	T T	T T	C C	T T	C C	T C	T T	T C	T C	T T	T C	T T	C C	T C	T C	C C	T C	T C	C C	C C	T T	T T	C C	C C	T C	T C
8	8_41829613	0	41829613	C T	T T	T T	T T	T T	C T	T T	T T	C T	T T	T T	T T	T T	T T	C T	T T	T T	T T	C T	T T	T T	T T	T T	T T	T T	C C	T T	T T	T T	T T	T T	C T
8	8_41866538	0	41866538	G G	G G	G G	A G	G G	G G	G G	A G	G G	G G	G G	A G	G G	A G	A G	A A	G G	A A	G G	A G	A G	G G	A G	G G	G G	G G	A G	A A	G G	G G	G G	A G
8	8_41982168	0	41982168	C T	T T	C T	C T	T T	C T	C C	C T	C T	C C	C T	C T	C C	C T	C T	T T	C C	T T	C T	C C	T T	C T	T T	C T	C C	C C	C T	C T	C C	C T	C T	C T
8	8_42041084	0	42041084	G G	G G	G G	A G	G G	G G	G G	A G	G G	G G	G G	A G	G G	A G	A G	A A	G G	A A	G G	G G	A G	A G	A G	G G	G G	G G	A G	A G	G G	G G	G G	A G
8	8_42127587	0	42127587	G G	G G	G G	A G	G G	A G	G G	A G	G G	G G	G G	A G	G G	A G	A G	A A	G G	A A	G G	G G	A G	G G	A G	G G	G G	G G	A G	A G	G G	G G	G G	A A
8	8_42134009	0	42134009	C C	C C	C C	T C	C C	T C	C C	T C	C C	C C	C C	T C	C C	T C	T C	T T	C C	T T	C C	C C	T C	C C	T C	C C	C C	C C	T C	T C	C C	C C	C C	T T
8	8_42224095	0	42224095	G A	G A	G A	A A	G A	G A	A A	A A	G A	A A	G A	A A	A A	A A	A A	A A	A A	A A	G G	A A	A A	G A	G A	G A	G A	G A	A A	A A	A A	G G	G A	A A
8	8_42226801	0	42226801	C T	C T	C T	T T	C T	C T	T T	T T	C T	T T	C T	T T	T T	T T	T T	T T	T T	T T	C C	T T	T T	C T	C T	C T	C T	C T	T T	T T	T T	C C	C T	T T
8	8_42275761	0	42275761	G G	G G	G G	A G	G G	G G	G G	A G	G G	G G	G G	A G	G G	A G	A A	A A	G G	A A	G G	G G	A G	G G	A G	G G	G G	G G	A G	A G	G G	G G	G G	A G
8	8_42305725	0	42305725	T T	T T	T T	C T	T T	T T	T T	C T	T T	T T	T T	C T	T T	C T	C C	C C	T T	C C	T T	T T	C T	T T	C T	T T	T T	C T	C T	C T	T T	T T	T T	C T
8	8_42345071	0	42345071	C C	C C	C C	T C	C C	C C	C C	C C	C C	C C	C C	T C	C C	T C	T C	T T	C C	T T	C C	C C	C C	C C	T C	C C	C C	T C	T T	T C	C C	C C	T C	T C
8	8_42353113	0	42353113	C C	C C	C C	A C	C C	C C	C C	C C	C C	C C	C C	A C	C C	A C	A C	A A	C C	A A	C C	C C	C C	C C	A C	C C	C C	C C	A C	A C	C C	C C	C C	A C
8	8_42353358	0	42353358	A A	G A	A A	G A	G A	A A	A A	G A	A A	A A	G A	G A	A A	G A	G A	A A	G A	A A	A A	A A	G G	A A	A A	A A	A A	A A	A A	A A	A A	A A	A A	A A
8	8_42451606	0	42451606	A A	A A	A A	A A	A A	A A	G G	G A	G A	G G	A A	A A	G G	A A	A A	A A	G A	A A	G A	G G	A A	G A	A A	G A	G A	G A	A A	G A	G G	A A	A A	A A
8	8_42453413	0	42453413	T C	T T	T C	C C	T T	T C	C C	T C	T C	C C	T C	T C	C C	C C	T C	C C	T C	C C	C C	C C	T T	C C	T C	C C	C C	C C	C C	C C	C C	C C	T C	C C
8	8_42462077	0	42462077	G A	G G	G A	A A	G G	G A	G G	G G	G A	G G	G A	G A	G G	A A	G A	A A	G G	A A	A A	G G	G G	A A	G A	G A	G A	A A	A A	G A	G G	A A	G A	A A
8	8_42462136	0	42462136	T G	T T	T G	G G	T T	T G	T T	T T	T G	T T	T G	T G	T T	G G	T G	G G	T T	G G	G G	T T	T T	G G	T G	T G	T G	G G	G G	T G	T T	G G	T G	G G
8	8_42512523	0	42512523	A A	A A	A G	G G	A A	A G	A A	A A	A G	A A	A G	A G	A A	G G	G G	G G	A A	G G	A G	G G	A A	A G	A G	A G	G G	G G	G G	G G	G G	G G	A G	G G
8	8_42518734	0	42518734	C C	C C	C C	A C	C C	C C	C C	C C	C C	C C	C C	A C	C C	A C	A C	A A	C C	A A	C C	C C	C C	C C	A C	C C	C C	C C	A C	A C	C C	C C	C C	A C
8	8_42567360	0	42567360	C C	T C	T C	C C	T C	C C	T T	T T	C C	T T	T C	T C	T T	C C	C C	C C	T T	C C	C C	T C	T T	C C	C C	T C	T C	C C	C C	C C	T T	C C	C C	C C
8	8_42567679	0	42567679	G G	A G	A G	G G	A G	G G	A A	A A	G G	A A	A G	A G	A A	G G	G G	G G	A A	G G	G G	A G	A A	G G	G G	A G	A G	G G	G G	G G	A A	G G	G G	G G
8	8_42625401	0	42625401	G G	G A	G A	G A	G A	G G	A A	A A	G G	A A	G A	A A	A A	G A	G A	A A	A A	A A	G A	A A	A A	G A	G A	G A	G A	G A	G A	A A	A A	G G	G G	G A
8	8_42721035	0	42721035	C C	T C	C C	C C	T C	C C	T T	T T	C C	T T	T C	T C	T T	C C	C C	C C	T T	C C	T C	T C	T T	T C	C C	T C	T C	T C	C C	C C	T T	C C	C C	C C
8	8_42723912	0	42723912	A G	A G	A A	A G	A G	A G	G G	G G	A G	G G	G G	A G	G G	A G	A G	A A	G G	A A	G G	G G	G G	G G	A A	G G	G G	G G	A G	A G	G G	G G	A G	A G
8	8_42749293	0	42749293	C C	C C	C C	C C	C C	C C	C C	C C	C C	C C	C C	C C	C C	C C	C C	C C	C C	C C	T C	T C	C C	T C	C C	C C	T C	T C	C C	C C	T T	C C	C C	C C
8	8_42756608	0	42756608	G G	G G	G G	A G	G G	A G	G G	G G	G G	G G	G G	G G	G G	A G	G G	G G	G G	G G	A G	A G	G G	A G	G G	G G	A G	A G	G G	A G	G G	A G	G G	A G
8	8_42808723	0	42808723	C C	C C	C C	A C	C C	C C	C C	C C	C C	C C	C C	A C	C C	C C	C C	A C	C C	A C	C C	C C	C C	C C	A C	C C	C C	C C	C C	A C	C C	C C	C C	A C
8	8_42844430	0	42844430	C C	C C	C C	A A	C C	C C	C C	C C	C C	C C	C C	A A	C C	C C	C C	A C	C C	A C	C C	C C	C C	C C	A C	C C	C C	C C	C C	A A	C C	C C	C C	A A
8	8_42895739	0	42895739	A A	A A	A A	C A	A A	A A	A A	A A	A A	A A	A A	C A	A A	A A	A A	C A	A A	C A	A A	A A	A A	A A	C A	A A	A A	A A	A A	C A	A A	A A	A A	C A
8	8_42896634	0	42896634	A A	A A	A A	A A	A A	A A	A A	A A	C A	A A	A A	A A	A A	A A	A A	A A	A A	A A	A A	A A	A A	A A	A A	A A	A A	C A	A A	A A	A A	A A	A A	A A
8	8_42899978	0	42899978	G G	A G	G G	G G	A G	G G	A A	A A	G G	A A	A G	A G	A A	G G	G G	G G	A A	G G	A G	A G	A A	A G	G G	A G	A G	A G	G G	G G	A A	G G	G G	G G
8	8_42900973	0	42900973	C C	C C	C C	C C	C C	C C	C C	C C	T C	C C	C C	C C	C C	C C	C C	C C	C C	C C	C C	T C	C C	C C	C C	C C	T C	T C	C C	T C	C C	T C	C C	C C
8	8_42981982	0	42981982	A A	A A	A A	C A	A A	A A	A A	A A	A A	A A	A A	C A	A A	A A	A A	C A	A A	C A	A A	C A	A A	A A	C A	A A	C A	A A	A A	C A	C C	A A	A A	C A
8	8_42997548	0	42997548	G A	G A	G G	A A	G A	G A	A A	A A	G A	A A	A A	A A	A A	G A	G A	G A	A A	G A	A A	A A	A A	A A	G A	A A	G A	A A	G G	A A	A A	G A	G G	A A
8	8_43056803	0	43056803	C C	C C	C C	T C	C C	C C	C C	C C	C C	C C	C C	T C	C C	C C	C C	T C	C C	T C	C C	T C	C C	C C	T C	C C	T C	C C	C C	T C	T T	C C	C C	T C
8	8_43102225	0	43102225	A A	G A	A A	G A	G A	G A	G G	G G	G A	G G	G A	G A	G G	G A	A A	A A	G G	A A	A A	A A	G G	A A	A A	G A	A A	G A	A A	A A	A A	A A	A A	G A
8	8_43132296	0	43132296	T T	T T	T T	C T	T T	T T	T T	T T	T T	T T	T T	C T	T T	T T	T T	C T	T T	C T	T T	C T	T T	T T	C T	T T	C T	T T	T T	C T	C C	T T	T T	C T
8	8_43173440	0	43173440	A G	G G	G G	G G	G G	G G	G G	G G	G G	G G	G G	G G	G G	G G	A G	G G	G G	G G	A G	G G	G G	A A	G G	G G	G G	A G	G G	G G	G G	G G	G G	G G
8	8_43175494	0	43175494	G G	A G	G G	G G	A G	G G	A A	A A	G G	A A	A G	A G	A A	G G	G G	G G	A A	G G	G G	G G	A A	G G	G G	A G	G G	G G	G G	G G	G G	G G	G G	G G
8	8_43194576	0	43194576	C C	C C	C C	A C	C C	A C	C C	C C	C C	C C	C C	C C	C C	A A	A C	A C	C C	A C	C C	C C	C C	C C	C C	C C	C C	C C	A C	C C	C C	C C	C C	A C
8	8_43198300	0	43198300	A A	A A	A A	A A	A A	A A	A A	A A	A A	A A	A A	A A	A A	G A	G A	G A	A A	G A	A A	A A	A A	A A	A A	A A	A A	A A	G A	A A	A A	A A	A A	A A
8	8_43207364	0	43207364	C T	C T	C C	T T	C T	C T	T T	T T	C C	T T	T T	T T	T T	C T	C T	C T	T T	C T	T T	T T	T T	T T	C T	T T	T T	C T	C T	T T	T T	T T	C T	T T
8	8_43217402	0	43217402	G G	G G	G G	A G	G G	G G	A A	A A	G G	A A	G G	A G	A A	G G	G G	A G	A G	A G	G G	A A	A G	A A	A G	A G	A G	A G	G G	A A	A A	G G	G G	A G
8	8_43287112	0	43287112	T T	T T	T T	C T	T T	T T	T T	T T	T T	T T	T T	C T	T T	T T	T T	C T	T T	C T	T T	C T	T T	T T	C T	T T	C T	T T	T T	C T	C C	T T	T T	C T
8	8_43337020	0	43337020	C C	C C	C C	C C	C C	C C	T T	T T	C C	T T	C C	C C	T T	C C	C C	C C	T C	C C	C C	C C	T C	C C	C C	T C	C C	C C	C C	C C	C C	C C	C C	C C
8	8_43355116	0	43355116	A A	A A	A A	A A	A A	A A	G G	G G	A A	G G	A A	A A	G G	A A	A A	A A	G A	A A	A A	A A	G A	A A	A A	G A	A A	A A	A A	A A	A A	A A	A A	A A
8	8_43388354	0	43388354	T T	T T	T T	C T	T T	T T	T T	T T	T T	T T	T T	C T	T T	T T	T T	C T	T T	C T	T T	T T	T T	C T	C T	T T	T T	T T	T T	C T	T T	T T	T T	C T
8	8_43442309	0	43442309	A G	A G	A A	A A	A G	A A	G G	G G	A A	G G	G G	A G	G G	A G	G G	A G	G G	A G	G G	G G	G G	A G	A A	G G	A G	A G	A G	A G	G G	A G	A A	A A
8	8_43452225	0	43452225	G G	G G	G G	G G	G G	G G	G G	G G	G G	G G	G G	G G	G G	A G	A G	A G	G G	A G	G G	A A	G G	A G	G G	G G	A G	A G	A G	A G	A A	G G	G G	G G
8	8_43583335	0	43583335	T T	C T	T T	T T	C T	T T	C C	C C	T T	C C	C T	C T	C C	T T	T T	T T	C C	T T	C T	T T	C C	T T	T T	C T	T T	T T	T T	T T	T T	T T	T T	T T
8	8_43612754	0	43612754	A A	A A	A A	G A	A A	A A	A A	A A	A A	A A	A A	G A	A A	A A	A A	G A	A A	G A	A A	A A	A A	G A	G A	A A	A A	A A	A A	G A	A A	A A	A A	G A
8	8_43625999	0	43625999	T T	T T	T T	C T	T T	T T	T T	T T	T T	T T	T T	C T	T T	T T	T T	C T	T T	C T	T T	T T	T T	C T	C T	T T	T T	T T	T T	C T	T T	T T	T T	C T
8	8_43703343	0	43703343	T C	C C	C C	C C	C C	C C	C C	C C	C C	C C	T C	C C	C C	C C	T C	C C	C C	C C	T C	T C	C C	T C	C C	T C	T C	T C	C C	C C	T T	T C	C C	C C
8	8_43708187	0	43708187	A G	G G	G G	G G	G G	G G	G G	G G	G G	G G	A G	G G	G G	G G	A G	G G	G G	G G	A G	G G	G G	G G	G G	A G	G G	G G	G G	G G	G G	A G	G G	G G
8	8_43755585	0	43755585	C C	C C	C C	T C	C C	C C	C C	C C	C C	C C	C C	T C	C C	T C	T C	T T	C C	T T	C C	C C	C C	C C	T C	C C	C C	C C	T C	T C	C C	C C	C C	T C
8	8_43760047	0	43760047	C C	C C	C C	T C	C C	C C	C C	C C	C C	C C	C C	T C	C C	T C	T C	T T	C C	T T	C C	C C	C C	C C	T C	C C	C C	C C	T C	T C	C C	C C	C C	T C
8	8_43831043	0	43831043	G G	G G	G G	A A	G G	A G	G G	G G	G G	G G	G G	A G	G G	A G	G G	A G	G G	A G	G G	G G	G G	G G	A G	G G	G G	G G	G G	A G	G G	G G	G G	A A
8	8_43833052	0	43833052	T T	T T	T T	C T	T T	T T	T T	T T	T T	T T	T T	C T	T T	T T	T T	C T	T T	C T	T T	T T	T T	T T	C T	T T	T T	T T	T T	C T	T T	T T	T T	C T
8	8_43844891	0	43844891	G A	A A	A A	A A	A A	A A	A A	A A	A A	A A	G A	A A	A A	A A	G A	A A	A A	A A	G A	A A	A A	A A	A A	G A	A A	A A	A A	A A	A A	G A	A A	A A
8	8_43905320	0	43905320	A A	A A	A A	A A	A A	A A	G G	G G	A A	G G	A A	A A	G G	A A	A A	A A	G A	A A	A A	A A	G A	A A	A A	G A	A A	A A	A A	A A	A A	A A	A A	A A
8	8_44001531	0	44001531	C C	C C	C C	C C	C C	C C	T T	T T	C C	T T	C C	C C	T T	C C	C C	C C	T C	C C	C C	C C	T C	C C	C C	T C	C C	C C	C C	C C	C C	C C	C C	C C
8	8_44002819	0	44002819	T T	T T	T T	T T	T T	T T	C C	C C	T T	C C	T T	T T	C C	T T	T T	T T	C T	T T	T T	T T	C T	T T	T T	C T	T T	T T	T T	T T	T T	T T	T T	T T
8	8_44087229	0	44087229	G T	G T	G T	T T	G T	T T	T T	T T	G T	T T	T T	T T	T T	T T	T T	T T	T T	T T	T T	T T	T T	T T	G T	T T	T T	T T	T T	T T	T T	T T	G T	T T
8	8_44122238	0	44122238	A A	A A	A A	C A	A A	C A	A A	A A	A A	A A	A A	C A	A A	A A	A A	C A	A A	C A	A A	A A	A A	A A	C A	A A	A A	A A	A A	C A	A A	A A	A A	C C
8	8_44164828	0	44164828	G A	G A	A A	A A	G A	A A	G G	G G	A A	G G	G A	G A	G G	A A	G A	A A	G G	A A	G A	G G	G G	G A	A A	G A	G G	A A	A A	G A	G G	G A	A A	A A
8	8_44205677	0	44205677	0 0	0 0	G G	A G	A G	G G	A A	A A	G G	A A	A G	A G	A A	A G	G G	G G	A A	G G	A G	A G	A A	A G	G G	A G	A G	G G	G G	A G	G G	A G	G G	G G
8	8_44268058	0	44268058	G G	G G	G G	A G	G G	A G	G G	G G	G G	G G	G G	A G	G G	G G	G G	A G	G G	A G	G G	G G	G G	A G	A G	G G	G G	G G	G G	A G	G G	G G	G G	A A
8	8_44278071	0	44278071	C C	C C	T C	C C	C C	T C	C C	C C	T C	C C	C C	C C	C C	C C	C C	C C	C C	C C	C C	C C	C C	C C	C C	C C	C C	T T	T C	C C	C C	C C	T C	C C
8	8_44324939	0	44324939	C C	C C	C C	C C	C C	C C	A A	A A	C C	A A	C C	C C	A A	C C	C C	C C	A C	C C	C C	C C	A C	C C	C C	A C	C C	C C	C C	C C	C C	C C	C C	C C
8	8_44378683	0	44378683	T T	T T	T T	C T	T T	T T	T T	T T	T T	T T	C T	T T	T T	C C	C C	C T	T T	C T	C T	T T	T T	T T	T T	C T	T T	T T	C T	T T	T T	C T	T T	T T
8	8_44430120	0	44430120	C C	C C	C C	C C	C C	A C	A A	A A	C C	A A	C C	C C	A A	C C	C C	C C	A C	C C	C C	C C	A C	C C	C C	A C	C C	C C	A C	C C	C C	C C	A C	C C
8	8_44454028	0	44454028	A A	G A	A A	A A	G A	G A	G G	G G	A A	G G	G A	G A	G G	A A	A A	A A	G G	A A	G A	A A	G G	A A	A A	G A	A A	A A	G A	A A	A A	A A	G A	A A
8	8_44457561	0	44457561	C C	A C	C C	C C	A C	A C	A A	A A	C C	A A	A A	A C	A A	A C	A C	A C	A A	A C	A A	C C	A A	C C	C C	A A	C C	C C	A A	C C	C C	A C	A C	C C
8	8_44503493	0	44503493	G T	T T	T T	T T	T T	T T	T T	T T	G T	T T	T T	T T	T T	T T	T T	T T	T T	T T	T T	T T	T T	G G	T T	T T	T T	G G	T T	T T	T T	T T	T T	T T
8	8_44545506	0	44545506	A A	A G	A G	A G	A G	A G	A A	A A	A A	A A	G G	G G	A A	A G	G G	G G	A G	G G	G G	G G	A G	A A	A G	A G	A G	A A	A G	G G	G G	A G	A A	G G
8	8_44548849	0	44548849	T T	T C	T C	T C	T C	C C	C C	C C	T T	C C	C C	C C	C C	T T	T C	T C	C C	T C	C C	T C	C C	T T	T C	C C	T C	T T	T C	T C	C C	T C	T C	C C
8	8_44594943	0	44594943	C C	C C	C C	C C	C C	C C	C C	C C	C C	C C	C C	C C	C C	C C	C C	C C	C C	C C	C C	T C	C C	C C	C C	C C	C C	C C	C C	T C	C C	C C	C C	C C
8	8_44639569	0	44639569	G T	T T	T T	G T	T T	T T	T T	T T	G T	T T	T T	T T	T T	G T	T T	T T	T T	T T	T T	G G	T T	G T	T T	T T	G T	G G	T T	G T	G G	T T	T T	T T
8	8_44639693	0	44639693	G T	T T	T T	G T	T T	T T	T T	T T	G T	T T	T T	T T	T T	G T	T T	T T	T T	T T	T T	G G	T T	G T	T T	T T	G T	G G	T T	G T	G G	T T	T T	T T
8	8_44700209	0	44700209	G A	G A	G A	G A	G A	A A	A A	A A	G G	A A	A A	A A	A A	G A	A A	A A	A A	A A	A A	A A	A A	G G	G A	A A	G A	G G	A A	A A	A A	G A	G A	A A
8	8_44714054	0	44714054	G G	A G	A G	A G	A G	A G	G G	G G	G G	G G	A G	A A	G G	G G	G G	A G	A G	A G	A G	G G	A G	G G	A G	G G	G G	G G	G G	A G	G G	G G	G G	A A
8	8_44740738	0	44740738	G G	G G	G G	A G	G G	A G	A A	A A	G G	A A	G G	G G	A A	A G	G G	G G	A G	G G	G G	G G	A G	G G	G G	A G	G G	G G	A G	G G	G G	G G	A G	G G
8	8_44793186	0	44793186	A A	A A	A A	A G	A A	A G	G G	G G	A G	G G	A G	A A	G G	G G	A G	A G	A G	A G	A G	G G	A G	G G	A A	G G	A G	G G	G G	A G	G G	A G	A G	A A
8	8_44814647	0	44814647	0 0	0 0	A C	A C	A C	A C	C C	C C	A C	C C	C C	A C	C C	C C	A C	A C	C C	A C	C C	C C	C C	C C	A A	C C	A C	C C	C C	A C	C C	A C	A C	A A
8	8_44968427	0	44968427	T C	T C	T T	T T	T C	T C	C C	C C	T C	C C	C C	T C	C C	T C	T C	T C	C C	T C	C C	C C	C C	C C	T T	C C	T C	C C	C C	T C	C C	T C	T C	T T
8	8_44978854	0	44978854	C T	C T	T T	C T	C T	C T	C C	C C	T T	C C	C T	C T	C C	C T	T T	T T	C C	T T	C T	C T	C C	C C	T T	C T	C T	T T	C T	T T	C C	T T	C T	T T
8	8_44982527	0	44982527	G G	G G	G G	G G	G G	G G	A A	A A	G G	A A	G G	G G	A A	G G	G G	G G	A G	G G	G G	A G	A G	G G	G G	A G	A G	G G	G G	G G	A A	G G	G G	G G
8	8_45052018	0	45052018	C A	C A	C A	C A	C A	A A	C C	C C	C C	C C	A A	A A	C C	C A	C A	A A	C A	A A	A A	C A	C A	C A	C A	C A	C C	C A	A A	A A	C C	C A	C A	A A
8	8_45063221	0	45063221	G G	G G	G G	G G	G G	G G	A A	A A	A G	A A	G G	G G	A A	G G	G G	G G	A G	G G	G G	A G	A G	G G	G G	A G	A G	A G	G G	G G	A A	G G	G G	G G
8	8_45089874	0	45089874	C C	C C	A C	A C	C C	A C	C C	C C	C C	C C	C C	A C	C C	C C	C C	A C	C C	A C	C C	C C	C C	C C	A C	C C	C C	C C	C C	A C	C C	C C	C C	A A
8	8_45150187	0	45150187	A A	G A	A A	A A	G A	A A	G G	G G	G A	G G	G A	G A	G G	A A	A A	A A	G G	A A	G A	G A	G G	G A	A A	G A	G A	G A	A A	A A	G G	A A	A A	A A
8	8_45153855	0	45153855	C T	T T	C T	C T	T T	C T	C C	C C	C T	C C	T T	C T	C C	T T	T T	C T	C T	C T	T T	C T	C T	T T	C T	C T	C T	C T	T T	C T	C C	T T	T T	C C
8	8_45227460	0	45227460	T G	T G	T G	T G	T G	G G	G G	G G	T T	G G	G G	G G	G G	T G	T G	G G	G G	G G	G G	G G	G G	G G	T G	G G	T G	T G	G G	G G	G G	T G	T G	G G
8	8_45359233	0	45359233	T T	T T	T T	C T	T T	T T	T T	T T	T T	T T	T T	T T	T T	C T	T T	T T	T T	T T	T T	T T	T T	T T	T T	T T	T T	T T	T T	T T	T T	T T	T T	T T
8	8_45443285	0	45443285	A G	G G	G G	G G	G G	G G	G G	G G	G G	G G	G G	G G	G G	G G	G G	G G	G G	G G	G G	G G	G G	G G	G G	G G	G G	G G	G G	G G	G G	G G	G G	G G
8	8_45468698	0	45468698	A A	A A	A A	A A	A A	A A	A A	A A	A A	A A	A A	A A	A A	A A	A A	A A	A A	A A	A A	A A	A A	G A	A A	A A	A A	A A	A A	A A	A A	A A	A A	A A
8	8_45516739	0	45516739	C C	C C	T C	T C	C C	T T	C C	C C	T C	C C	T C	T C	C C	C C	C C	T C	C C	T C	T C	T C	C C	T C	T C	T C	T C	T C	T C	T C	T T	T C	T C	T T
8	8_45536252	0	45536252	C C	C C	T C	T T	C C	T T	C C	C C	C C	C C	0 0	T T	C C	C C	C C	T C	C C	T C	T T	C C	C C	C C	T C	T C	C C	C C	T C	0 0	C C	T C	T C	T T
8	8_45539657	0	45539657	C C	C C	C C	C C	C C	C C	T T	T T	T C	T T	C C	C C	T T	C C	T C	C C	T C	C C	C C	T C	T C	C C	C C	T C	T C	T C	C C	C C	T T	C C	C C	C C
8	8_45539738	0	45539738	A A	A A	A A	A A	A A	A A	G G	G G	G A	G G	A A	A A	G G	A A	G A	A A	G A	A A	A A	G A	G A	A A	A A	G A	G A	G A	A A	A A	G G	A A	A A	A A
8	8_45545150	0	45545150	G G	G G	G G	G G	G G	G G	A A	A A	G G	A A	G G	G G	A A	A G	A G	A G	A G	A G	G G	G G	A G	G G	G G	A G	G G	A G	A G	G G	G G	G G	G G	G G
8	8_45635527	0	45635527	G A	G A	G A	A A	G A	A A	G G	G G	G A	G G	A A	A A	G G	A A	G A	A A	G A	A A	A A	A A	G A	G A	G A	G A	G A	A A	A A	A A	A A	G A	G A	A A
8	8_45636035	0	45636035	C C	C T	C T	T T	C T	T T	C C	C C	C C	C C	T T	T T	C C	T T	C T	T T	C T	T T	T T	C T	C T	T T	C T	C T	C C	C T	T T	T T	C C	C T	C T	T T
8	8_45652492	0	45652492	0 0	C T	C T	C T	T T	C C	T T	T T	T T	T T	T T	C T	T T	T T	T T	C T	T T	C T	C T	T T	T T	T T	C T	T T	T T	C T	C T	C T	T T	C T	C T	C C
8	8_45697113	0	45697113	C C	T C	C C	T C	T C	C C	T T	T T	C C	T T	T T	T C	T T	T C	C C	C C	T T	C C	T T	T C	T T	T C	C C	T T	T C	T C	C C	C C	T T	T C	C C	C C
8	8_45789509	0	45789509	T T	T T	T T	T T	T T	T T	C C	C C	T T	C C	T T	T T	C C	T T	T T	T T	C T	T T	T T	T T	C T	T T	T T	C T	T T	T T	T T	T T	T T	T T	T T	T T
8	8_45824357	0	45824357	C C	C C	C C	C C	C C	C C	T T	T T	C C	T T	C C	C C	T T	C C	C C	C C	T C	C C	C C	C C	T C	C C	C C	T C	C C	C C	C C	C C	C C	C C	C C	C C
8	8_45884982	0	45884982	T T	T C	T T	T T	T C	T T	C C	C C	T T	C C	C C	T C	C C	T C	C C	T C	C C	T C	C C	C C	C C	T C	T T	C C	T C	T C	T C	T C	C C	T C	T T	T T
8	8_46018577	0	46018577	C C	C C	C C	C C	C C	C C	T T	T T	C C	T T	C C	C C	T T	C C	C C	C C	T C	C C	C C	C C	T C	C C	C C	T C	C C	C C	C C	C C	C C	C C	C C	C C
8	8_46041919	0	46041919	T C	C C	C C	T C	C C	T C	C C	C C	C C	C C	C C	C C	C C	T C	C C	C C	C C	C C	T C	C C	C C	C C	C C	C C	C C	C C	T C	C C	C C	T C	T C	C C
8	8_46057162	0	46057162	C T	T T	T T	C T	T T	C T	T T	T T	T T	T T	T T	T T	T T	C T	T T	T T	T T	T T	T T	T T	T T	T T	T T	T T	T T	T T	C T	T T	T T	T T	C T	T T
8	8_46185505	0	46185505	C C	C C	C C	C C	C C	C C	T T	T T	C C	T T	C C	C C	T T	C C	C C	C C	T C	C C	C C	C C	T C	C C	C C	T C	C C	C C	C C	C C	C C	C C	C C	C C
8	8_46199936	0	46199936	0 0	G G	G G	T G	G G	T G	G G	G G	T G	G G	G G	G G	G G	T T	T G	T G	G G	T G	G G	T G	G G	G G	G G	G G	G G	T T	T T	T G	G G	G G	T G	G G
8	8_46201875	0	46201875	C T	T T	T T	C T	T T	C T	T T	T T	T T	T T	T T	T T	T T	C C	C T	C T	T T	C T	T T	T T	T T	T T	T T	T T	T T	T T	C C	T T	T T	T T	C T	T T
8	8_46210154	0	46210154	A A	A A	A A	A A	A A	A A	A A	A A	G A	A A	A A	A A	A A	A A	G A	A A	A A	A A	A A	G A	A A	A A	A A	A A	A A	G G	A A	G A	A A	A A	A A	A A
8	8_46260817	0	46260817	A G	A G	A A	G G	A G	A G	G G	G G	A A	G G	G G	G G	G G	A G	A G	A G	G G	A G	A G	A G	G G	A G	A G	G G	A A	A A	A A	G G	A A	A A	A A	G G
8	8_46316875	0	46316875	C C	C C	C C	C C	C C	T C	C C	C C	T C	C C	C C	C C	C C	T C	T C	T C	C C	T C	T C	T C	C C	T C	C C	C C	T C	T T	T T	C C	T T	T C	T C	C C
8	8_46318467	0	46318467	C C	C C	T C	C C	C C	T C	C C	C C	T C	C C	C C	C C	C C	C C	T C	C C	C C	C C	T C	T C	C C	T C	C C	C C	T C	T T	T C	C C	T T	T C	T C	C C
8	8_46370578	0	46370578	G G	G G	G G	A G	G G	A G	G G	A G	G G	G G	G G	A G	G G	G G	G G	A G	G G	A G	G G	G G	A G	G G	A G	G G	G G	G G	G G	A G	G G	G G	G G	A A
8	8_46397800	0	46397800	G G	G G	G G	T G	G G	T G	G G	T G	G G	G G	G G	T G	G G	G G	G G	T G	G G	T G	G G	G G	T G	G G	T G	G G	G G	G G	G G	T G	G G	G G	G G	T T
8	8_46457958	0	46457958	A A	A A	A A	A A	A A	A A	A A	A A	G A	A A	A A	A A	A A	A A	A A	A A	A A	A A	A A	A A	A A	A A	A A	A A	A A	G A	A A	A A	A A	A A	A A	A A
8	8_46475496	0	46475496	G G	G G	G G	A G	G G	A G	G G	A G	G G	G G	G G	A G	G G	G G	G G	A G	G G	G G	G G	G G	A G	G G	A G	G G	G G	G G	G G	G G	G G	G G	G G	A A
8	8_46478984	0	46478984	G G	G G	G G	G G	G G	G G	G G	G G	A G	G G	G G	G G	G G	G G	G G	G G	G G	G G	G G	G G	G G	G G	G G	G G	G G	A G	G G	G G	G G	G G	G G	G G
8	8_46548982	0	46548982	A G	A G	A A	A G	A G	A G	G G	G G	A G	G G	G G	A G	G G	G G	G G	A G	G G	G G	G G	G G	G G	G G	A A	G G	A G	G G	G G	G G	G G	A G	A G	A A
8	8_46555059	0	46555059	A G	A G	A A	A G	A G	A G	G G	G G	A G	G G	G G	A G	G G	G G	G G	A G	G G	G G	G G	G G	G G	G G	A A	G G	A G	G G	G G	G G	G G	A G	A G	A A
8	8_46609281	0	46609281	A G	A G	A G	G G	A G	G G	G G	G G	A G	G G	G G	G G	G G	G G	G G	G G	G G	G G	G G	G G	G G	G G	A G	G G	A G	G G	G G	G G	G G	A G	A G	G G
8	8_46625248	0	46625248	T T	T T	C T	C T	T T	C T	C C	C C	T T	C C	T T	C T	C C	T T	T T	C T	C T	T T	T T	T T	C T	T T	C T	C T	T T	T T	T T	T T	T T	T T	T T	C C
8	8_46679260	0	46679260	G G	G G	G G	G G	G G	A G	G G	G G	G G	G G	G G	G G	G G	G G	G G	G G	G G	G G	G G	G G	G G	A G	G G	G G	G G	G G	A G	G G	G G	G G	A G	G G
8	8_46705986	0	46705986	C T	C T	C T	T T	C T	T T	T T	T T	C T	T T	T T	T T	T T	T T	T T	T T	T T	T T	T T	T T	T T	T T	C T	T T	C T	T T	T T	T T	T T	C T	C T	T T
8	8_46810003	0	46810003	T G	G G	G G	G G	G G	G G	G G	G G	G G	G G	G G	G G	G G	T G	T T	T G	G G	T G	T G	T G	G G	G G	G G	G G	G G	G G	T G	T G	G G	T G	G G	G G
8	8_46857897	0	46857897	A G	A G	A A	A G	A G	A A	A A	A A	A G	A A	G G	A G	A A	G G	G G	A G	A G	G G	G G	G G	A G	G G	A A	A G	A G	G G	A G	G G	G G	A G	A A	A A
8	8_46883563	0	46883563	C T	C T	C T	T T	C T	T T	T T	T T	C T	T T	T T	T T	T T	T T	T T	T T	T T	T T	T T	T T	T T	C T	C T	T T	C T	T T	T T	T T	T T	C T	C T	T T
8	8_46962744	0	46962744	G G	G G	G G	A G	G G	G G	G G	G G	A G	G G	G G	G G	G G	A G	A G	G G	G G	A G	A G	A G	G G	G G	G G	G G	A G	A A	G G	A G	A A	G G	G G	G G
8	8_46972824	0	46972824	G G	G G	A G	A G	G G	A G	G G	G G	G G	G G	G G	A G	G G	G G	G G	A G	G G	G G	G G	G G	G G	G G	A G	G G	G G	G G	G G	G G	G G	G G	G G	A A
8	8_47054647	0	47054647	T C	T C	T C	C C	T C	C C	C C	C C	T C	C C	C C	C C	C C	C C	C C	C C	C C	C C	C C	C C	C C	T C	T C	C C	T C	C C	C C	C C	C C	T C	T C	C C
8	8_47097183	0	47097183	T T	0 0	C T	C T	T T	C T	T T	T T	T T	T T	T T	C T	T T	T T	T T	C T	T T	T T	T T	T T	T T	T T	C T	T T	T T	T T	T T	T T	T T	T T	T T	C C
8	8_47098988	0	47098988	G A	G G	G A	G A	G G	A A	A A	A A	G G	A A	G G	G A	A A	G A	G A	A A	G A	G A	G A	G A	G A	G G	G A	G A	G G	G G	A A	G A	G G	G A	G A	A A
8	8_47122807	0	47122807	A G	G G	A G	A G	G G	A G	A A	A A	G G	A A	G G	A G	A A	A G	A G	A A	A G	A G	A G	G G	A G	G G	A G	A G	G G	G G	A G	G G	G G	A G	G G	A A
8	8_47164120	0	47164120	G G	G G	G G	G G	G G	G G	A A	A A	G G	A A	G G	G G	A A	G G	G G	G G	A G	G G	G G	G G	A G	G G	G G	A G	G G	G G	G G	G G	G G	G G	G G	G G
8	8_47184979	0	47184979	C A	A A	A A	C A	A A	A A	A A	A A	C A	A A	A A	A A	A A	C A	A A	A A	A A	C A	C A	C A	A A	A A	A A	A A	C A	C C	A A	C A	C C	A A	A A	A A
8	8_47307878	0	47307878	G G	G A	G A	G A	G A	G A	G G	G G	G A	G G	A A	A A	G G	G A	A A	A A	G A	A A	A A	G A	G A	A A	G A	G A	G A	A A	G A	G A	A A	G A	G G	A A
8	8_47307951	0	47307951	A A	A G	A G	A G	A G	A G	A A	A A	A G	A A	G G	G G	A A	A G	G G	G G	A G	G G	G G	A G	A G	G G	A G	A G	A G	G G	A G	A G	G G	A G	A A	G G
8	8_47308358	0	47308358	A A	A C	A C	A C	A C	A C	A A	A A	A C	A A	C C	C C	A A	A C	C C	C C	A C	C C	C C	A C	A C	C C	A C	A C	A C	C C	A C	A C	C C	A C	A A	C C
8	8_47310930	0	47310930	G G	G A	G A	G A	G A	A A	G G	G G	G A	G G	A A	A A	G G	G A	A A	A A	G A	A A	A A	A A	G A	A A	G A	G A	G A	A A	A A	A A	A A	G A	G A	A A
8	8_47312073	0	47312073	T T	T C	T C	T C	T C	C C	T T	T T	T C	T T	C C	C C	T T	T C	C C	C C	T C	C C	C C	C C	T C	C C	T C	T C	T C	C C	C C	C C	C C	T C	T C	C C
8	8_47312424	0	47312424	G G	G A	G A	G A	G A	G A	G G	G G	G A	G G	A A	A A	G G	G A	G A	A A	G A	G A	A A	G A	G A	A A	G A	G A	G A	A A	G A	G G	A A	G A	G G	A A
8	8_47341409	0	47341409	G G	G G	G G	G G	G G	G G	T T	T T	G G	T T	G G	G G	T T	G G	T G	T G	T G	T G	T G	G G	T G	G G	G G	T G	G G	G G	T G	G G	G G	T G	G G	G G
8	8_47453445	0	47453445	T T	T T	C C	C T	T T	C T	T T	T T	T T	T T	T T	C T	T T	C T	T T	C T	T T	T T	T T	T T	T T	T T	C T	T T	T T	T T	T T	T T	T T	T T	T T	C C
8	8_47462302	0	47462302	A A	A A	G G	G A	A A	G A	A A	A A	A A	A A	A A	G A	A A	G A	A A	G A	A A	A A	A A	A A	A A	A A	G A	A A	A A	A A	A A	A A	A A	A A	A A	G G
8	8_47483921	0	47483921	A A	A A	A A	A A	A A	A A	G G	G G	A A	G G	A A	A A	G G	A A	A A	A A	A A	A A	A A	A A	G A	A A	A A	A A	A A	A A	A A	A A	A A	A A	A A	A A
8	8_47530636	0	47530636	G G	A G	G G	G G	A G	G G	G G	G G	G G	G G	A A	A G	G G	G G	G G	G G	A A	G G	G G	A G	A G	A G	G G	A A	G G	G G	G G	A G	G G	G G	G G	G G
8	8_47584249	0	47584249	T T	T T	G G	G G	T T	G G	T T	T T	T T	T T	T T	G T	T T	G G	G T	G G	T T	G G	G T	G T	T T	T T	G T	T T	G T	T T	G G	G T	G G	T T	G T	G G
8	8_47714441	0	47714441	T T	C T	T T	T T	C T	C T	T T	T T	C T	T T	C C	C T	T T	T T	C T	C T	C C	C T	T T	T T	C T	C T	T T	C C	T T	C T	C C	T T	T T	T T	C T	T T
8	8_47714527	0	47714527	C C	T C	C C	C C	T C	T C	C C	C C	T C	C C	T T	T C	C C	C C	T C	T C	T T	T C	C C	C C	T T	T T	C C	T T	C C	T T	T T	C C	C C	C C	T C	C C
8	8_47778935	0	47778935	C C	T C	T T	T C	T C	T T	C C	C C	C C	C C	T T	T T	C C	T C	T C	T T	T T	T C	T C	T C	T C	T C	T C	T T	T C	C C	T T	C C	T T	C C	T C	T T
8	8_47780045	0	47780045	G G	A G	A A	A G	A G	A A	G G	G G	G G	G G	A A	A A	G G	A G	A G	A A	A A	A G	A G	A G	A G	A G	A G	A A	A G	G G	A A	G G	A A	G G	A G	A A
8	8_47829454	0	47829454	T T	T T	C C	C T	T T	C T	T T	T T	T T	T T	T T	C T	T T	C T	T T	C T	T T	T T	C T	C T	T T	T T	C T	T T	C T	T T	T T	T T	C C	T T	T T	C C
8	8_47888150	0	47888150	A A	A G	G G	G G	A G	G G	G G	G G	A G	G G	G G	G G	G G	G G	G G	G G	G G	G G	A G	G G	G G	G G	A G	G G	A G	G G	G G	G G	G G	A A	A G	G G
8	8_47952501	0	47952501	C C	T C	C C	T C	T C	T C	C C	C C	T C	C C	T T	T C	C C	T C	T T	T C	T T	T T	C C	T C	T C	T C	C C	T T	C C	T C	T T	T T	C C	C C	T C	C C
8	8_47958499	0	47958499	G G	A G	G G	A G	A G	A G	G G	G G	A G	G G	A A	A G	G G	A G	A A	A G	A A	A A	G G	A G	A G	A G	G G	A A	G G	A G	A A	A A	G G	G G	A G	G G
8	8_47958740	0	47958740	A A	G A	A A	G A	G A	G A	A A	A A	G A	A A	G G	G A	A A	G A	G G	G A	G G	G G	A A	G A	G A	G A	A A	G G	A A	G A	G G	G G	A A	A A	G A	A A
8	8_48115403	0	48115403	C C	C T	C C	C T	C T	C T	T T	T T	C C	T T	T T	C T	T T	C T	C T	C C	T T	C T	C T	T T	T T	T T	C C	T T	C C	C T	C T	T T	C C	C T	C T	C C
8	8_48176828	0	48176828	A G	A A	G G	A G	A A	G G	A A	A A	A G	A A	A A	A G	A A	A G	G G	G G	A A	A G	G G	G G	A A	A G	A G	A A	A G	A G	G G	A G	G G	A G	A G	G G
8	8_48269330	0	48269330	C A	C A	A A	A A	C A	A A	A A	A A	C A	A A	A A	A A	A A	A A	C A	A A	A A	C A	A A	A A	A A	A A	C A	A A	C A	C A	A A	C A	A A	C A	C A	A A
8	8_48272817	0	48272817	A G	A G	G G	G G	A G	G G	G G	G G	A G	G G	G G	G G	G G	G G	A G	G G	G G	A G	G G	A G	G G	G G	A G	G G	A G	A G	G G	A G	G G	A G	A G	G G
8	8_48321246	0	48321246	G A	A A	G G	G A	A A	G G	A A	A A	A A	A A	A A	G A	A A	G A	G A	G G	A A	G G	G A	G A	A A	G A	A A	A A	G A	G A	G G	G A	G G	A A	G A	G A
8	8_48321635	0	48321635	T C	C C	T T	T C	C C	T T	C C	C C	C C	C C	C C	T C	C C	T C	T C	T T	C C	T T	T C	T C	C C	T C	C C	C C	T C	T C	T T	T C	T T	C C	T C	T C
8	8_48346332	0	48346332	A A	G A	A A	A A	G A	A A	A A	A A	A A	A A	G G	G A	A A	A A	G A	A A	G G	G A	G A	G A	G A	G A	A A	G G	A A	G A	A A	G G	A A	G A	A A	A A
8	8_48346548	0	48346548	C C	T C	C C	C C	T C	C C	C C	C C	C C	C C	T T	T C	C C	C C	T C	C C	T T	T C	T C	T C	T C	T C	C C	T T	C C	T C	C C	T T	C C	T C	C C	C C
8	8_48391504	0	48391504	C C	T C	C C	C C	T C	C C	T T	T T	C C	T T	T T	T C	T T	C C	T C	C C	T T	T C	C C	T C	T T	T C	C C	T T	C C	T C	C C	T T	C C	C C	C C	C C
8	8_48392549	0	48392549	G G	A G	G G	G G	A G	G G	A A	A A	G G	A A	A A	A G	A A	G G	A G	G G	A A	A G	G G	A G	A A	A G	G G	A A	G G	A G	G G	A A	G G	G G	G G	G G
8	8_48441580	0	48441580	T T	T T	G G	T T	T T	T T	T T	T T	T T	T T	T T	T T	T T	T T	T T	T T	T T	T T	G T	T T	T T	T T	T T	T T	G T	T T	T T	T T	G G	T T	T T	T T
8	8_48516702	0	48516702	C C	C C	A A	C C	C C	C C	C C	C C	C C	C C	C C	C C	C C	C C	C C	C C	C C	C C	A C	C C	C C	C C	C C	C C	A C	C C	C C	C C	A A	C C	C C	C C
8	8_48539362	0	48539362	C C	C C	T T	C C	C C	C C	C C	C C	C C	C C	C C	C C	C C	C C	C C	C C	C C	C C	T C	C C	C C	C C	C C	C C	T C	C C	C C	C C	T T	C C	C C	C C
8	8_48552385	0	48552385	G G	G G	A A	G G	G G	G G	G G	G G	G G	G G	G G	G G	G G	G G	A G	G G	G G	G G	A G	G G	G G	G G	G G	G G	A G	G G	G G	G G	A A	G G	G G	G G
8	8_48654665	0	48654665	G A	G A	A A	G A	G A	A A	A A	A A	G A	A A	A A	A A	A A	G A	G A	A A	A A	A A	G A	A A	A A	A A	G A	A A	G G	G A	A A	A A	G G	G A	G A	A A
8	8_48654741	0	48654741	T C	T C	C C	T C	T C	C C	C C	C C	T C	C C	C C	C C	C C	T C	T C	C C	C C	C C	T C	C C	C C	C C	T C	C C	T T	T C	C C	C C	T T	T C	T C	C C
8	8_48654961	0	48654961	G A	G A	A A	G A	G A	A A	A A	A A	G A	A A	A A	A A	A A	G A	G A	A A	A A	A A	G A	A A	A A	A A	G A	A A	G G	G A	A A	A A	G G	G A	G A	A A
8	8_48655825	0	48655825	T C	T C	T T	T C	T C	C C	C C	C C	T C	C C	C C	C C	C C	T C	T C	C C	C C	C C	T C	C C	C C	C C	T C	C C	T T	T C	C C	C C	T T	T C	T C	C C
8	8_48656509	0	48656509	A C	A C	C C	A C	A C	C C	C C	C C	A C	C C	C C	C C	C C	A C	A C	C C	C C	C C	A C	C C	C C	C C	A C	C C	A A	A C	C C	C C	A A	A C	A C	C C
8	8_48659078	0	48659078	T C	T C	C C	T C	T C	C C	C C	C C	T C	C C	C C	C C	C C	T C	T C	C C	C C	C C	T C	C C	C C	C C	T C	C C	T T	T C	C C	C C	T T	T C	T C	C C
8	8_48674737	0	48674737	A G	A A	A A	G G	A A	A G	G G	G G	A G	G G	G G	G G	G G	G G	A G	G G	G G	G G	A A	A G	A G	A G	A G	G G	A A	A G	A G	G G	A A	A A	A A	G G
8	8_48691308	0	48691308	A A	A A	A A	A A	A A	G A	A A	A A	A A	A A	A A	A A	A A	A A	A A	A A	A A	A A	A A	A A	A A	A A	A A	A A	A A	A A	G A	A A	A A	A A	G A	A A
8	8_48721920	0	48721920	A A	G A	A A	A A	G A	A A	A A	A A	A A	A A	A A	A A	A A	A A	A A	A A	A A	A A	G A	A A	G A	A A	A A	A A	A A	A A	A A	A A	A A	G A	A A	A A
8	8_48742198	0	48742198	G A	G G	G G	A A	G G	G A	A A	A A	G A	A A	A A	A A	A A	A A	G A	A A	A A	A A	G G	G G	A A	G A	G A	A A	G G	G A	G A	G A	G G	G G	G G	A A
8	8_48806011	0	48806011	T T	C T	T T	T T	C T	T T	T T	T T	T T	T T	T T	T T	T T	T T	T T	T T	T T	T T	C T	C T	C T	T T	T T	T T	T T	T T	T T	C T	T T	C T	T T	T T
8	8_48806196	0	48806196	G A	G A	G G	A A	G A	A A	A A	A A	G A	A A	A A	A A	A A	A A	G A	A A	A A	A A	G A	G A	A A	G A	G A	A A	G G	A A	A A	A A	G G	G A	G A	A A
8	8_48872235	0	48872235	C T	C T	T T	T T	C T	T T	T T	T T	C T	T T	T T	T T	T T	T T	C T	T T	T T	T T	C T	C T	T T	T T	C T	T T	C C	C T	T T	C T	C C	C T	C T	T T
8	8_48930630	0	48930630	A A	A A	A A	G A	A A	G A	A A	A A	G A	A A	G G	G A	A A	G A	G A	G A	G G	G A	A A	G G	A A	G G	G A	G G	A A	G G	G G	G A	A A	A A	G A	G A
8	8_48958869	0	48958869	A G	G G	G G	A G	G G	A G	A A	A A	G G	A A	G G	A G	A A	A G	G G	A G	G G	G G	G G	G G	A G	G G	G G	G G	G G	G G	G G	G G	G G	G G	G G	A G
8	8_49037660	0	49037660	G A	G G	A A	A A	G G	A A	A A	A A	G A	A A	A A	A A	A A	A A	A A	A A	A A	A A	G G	G A	G A	A A	G A	A A	G G	A A	A A	G A	G A	G G	G A	A A
8	8_49070142	0	49070142	C C	C C	T T	T C	C C	C C	C C	C C	C C	C C	T T	T C	C C	T C	C C	C C	T T	C C	C C	C C	C C	T C	C C	T T	C C	C C	C C	C C	T C	C C	C C	C C
8	8_49073282	0	49073282	C T	C C	T T	T T	C C	T T	T T	T T	C T	T T	T T	T T	T T	T T	T T	T T	T T	T T	C C	C T	C T	T T	C T	T T	C C	T T	T T	C T	C T	C C	C T	T T
8	8_49088753	0	49088753	G G	G G	G G	T G	G G	T G	G G	G G	G G	G G	G G	T G	G G	T G	G G	T G	G G	G G	G G	G G	G G	T G	G G	G G	G G	G G	G G	G G	G G	G G	G G	T G
8	8_49102334	0	49102334	T C	T T	C C	C C	T T	C C	C C	C C	T C	C C	C C	C C	C C	C C	C C	C C	C C	C C	T T	T C	T C	C C	T C	C C	T T	C C	C C	T C	T C	T T	T C	C C
8	8_49140171	0	49140171	C C	C C	C C	C C	C C	C C	C C	C C	C C	C C	C C	C C	C C	C C	C C	C C	C C	C C	C C	C C	C C	T C	C C	C C	C C	C C	C C	C C	C C	C C	C C	C C
8	8_49140348	0	49140348	G G	G G	G G	G G	G G	G G	G G	G G	G G	G G	G G	G G	G G	G G	G G	G G	G G	G G	G G	G G	G G	A G	G G	G G	G G	G G	G G	G G	G G	G G	G G	G G
8	8_49140411	0	49140411	A A	A A	A A	A A	A A	A A	A A	A A	A A	A A	A A	A A	A A	A A	A A	A A	A A	A A	A A	A A	A A	G A	A A	A A	A A	A A	A A	A A	A A	A A	A A	A A
8	8_49147952	0	49147952	T C	C C	C C	T C	C C	C C	C C	C C	T C	C C	T T	T C	C C	T C	T C	C C	T T	T C	C C	C C	C C	T T	T C	T T	C C	T T	C C	T C	T C	C C	C C	T C
8	8_49204517	0	49204517	G G	A G	G G	G G	A G	A G	G G	G G	G G	G G	G G	G G	G G	G G	A G	A G	G G	A G	A G	A G	A G	G G	G G	G G	G G	G G	A A	A G	G G	A G	A G	G G
8	8_49212719	0	49212719	G A	G A	A A	G A	G A	A A	A A	A A	G A	A A	G G	G A	A A	G A	A A	A A	G G	A A	G A	A A	A A	G A	G A	G G	G G	G A	A A	A A	G G	G A	G A	A A
8	8_49387018	0	49387018	C T	C T	C C	C T	C T	C T	C C	C C	C T	C C	T T	C T	C C	C T	C T	C C	T T	C T	C T	C T	C T	T T	C T	T T	C C	T T	C T	T T	C T	C T	C T	C T
8	8_49467333	0	49467333	G A	G A	A A	G A	G A	G A	G G	G G	G A	G G	A A	G A	G G	G A	G A	G G	A A	G A	G A	G A	G A	A A	G A	A A	G G	A A	G A	A A	G A	G A	G A	G A
8	8_49521255	0	49521255	T C	T C	C C	T C	T C	T C	T T	T T	T C	T T	C C	T C	T T	T C	T C	T T	C C	T C	T C	T C	T C	C C	T C	C C	T T	C C	T C	C C	T C	T C	T C	T C
8	8_49537635	0	49537635	A G	A G	G G	G G	A G	G G	G G	G G	A G	G G	G G	G G	G G	G G	G G	G G	G G	G G	A G	G G	G G	G G	A G	G G	A A	G G	G G	G G	A G	A G	A G	G G
8	8_49630090	0	49630090	A A	G A	G G	A A	G A	G A	A A	A A	G A	A A	A A	A A	A A	A A	A A	A A	A A	G A	G A	G G	G A	G A	G A	A A	A A	G A	G A	G G	A A	G A	G A	G A
8	8_49709366	0	49709366	T T	T T	T T	T T	T T	T T	G G	G G	T T	G G	T T	T T	G G	T T	G T	G T	T T	G T	T T	G T	G T	T T	T T	T T	T T	T T	G T	T T	T T	T T	T T	T T
8	8_49738840	0	49738840	G A	A A	A A	G A	A A	G G	A A	A A	A A	A A	A A	G A	A A	G A	A A	G A	A A	A A	A A	G A	A A	A A	A A	A A	A A	A A	G A	A A	A A	A A	G A	G A
8	8_49760401	0	49760401	T T	T T	T T	C T	T T	C T	C C	C C	T T	C C	T T	C T	C C	C T	C T	C C	T T	C T	T T	T T	C T	T T	T T	T T	T T	T T	C T	T T	T T	T T	T T	C T
8	8_49811035	0	49811035	A G	A A	G G	G G	A A	G G	G G	G G	A G	G G	G G	G G	G G	G G	G G	G G	G G	G G	A G	A G	A G	G G	A G	G G	A A	G G	G G	A G	A G	A G	A G	G G
8	8_49818775	0	49818775	T T	T T	T T	C T	T T	T T	C C	C C	T T	C C	C C	C T	C C	C T	C C	C T	C C	C T	T T	T T	C T	C T	T T	C C	T T	C T	C T	T T	C T	T T	T T	T T
8	8_49887450	0	49887450	G G	G G	G G	G G	G G	G G	G G	G G	A G	G G	G G	G G	G G	G G	G G	G G	G G	G G	G G	G G	G G	G G	A G	G G	G G	A G	G G	G G	G G	G G	G G	A G
8	8_49935475	0	49935475	A A	A A	A A	A A	A A	A A	A A	A A	C A	A A	A A	A A	A A	A A	A A	A A	A A	A A	A A	A A	A A	A A	C A	A A	A A	C A	A A	A A	A A	A A	A A	C A
8	8_49995789	0	49995789	C T	T T	T T	T T	T T	T T	T T	T T	T T	T T	T T	T T	T T	T T	T T	T T	T T	T T	T T	T T	T T	T T	T T	T T	T T	T T	T T	T T	T T	T T	T T	T T
8	8_50007706	0	50007706	G G	G G	G G	G G	G G	T G	T T	T T	T G	T T	G G	G G	T T	G G	T G	T G	G G	T T	G G	T G	T G	T G	T G	G G	G G	T G	T T	T G	G G	G G	T G	T G
8	8_50010403	0	50010403	C C	C C	C C	C C	C C	T C	T T	T T	T C	T T	C C	0 0	T T	C C	T C	T C	C C	T T	C C	T C	T C	T C	T C	C C	C C	T C	T T	T C	C C	C C	T C	T C
8	8_50183825	0	50183825	T T	T T	T T	T T	T T	T T	G G	G G	G T	G G	T T	T T	G G	T T	G T	G T	T T	G G	T T	G T	G T	T T	G T	T T	T T	G T	G T	G T	T T	T T	T T	G T
8	8_50210952	0	50210952	T T	T T	T T	T T	T T	T T	C C	C C	C T	C C	T T	T T	C C	T T	C T	C T	T T	C C	T T	C T	C T	T T	C T	T T	T T	C T	C T	C T	T T	T T	T T	C T
8	8_50272880	0	50272880	A G	G G	A A	G G	G G	A G	G G	G G	A G	G G	G G	G G	A G	G G	A G	A G	G G	A A	A G	A G	G G	G G	A G	G G	G G	A G	A A	A G	G G	A G	A G	A G
8	8_50294819	0	50294819	A A	A A	G G	A A	A A	A A	A A	A A	G A	A A	A A	A A	G A	A A	G A	G A	A A	G G	G A	G A	A A	A A	G A	A A	A A	G A	G A	G A	A A	G A	A A	G A
8	8_50302416	0	50302416	A G	G G	G G	G G	G G	A G	G G	G G	G G	G G	G G	G G	G G	G G	G G	G G	G G	G G	G G	G G	G G	G G	G G	G G	G G	G G	A G	G G	G G	G G	A G	G G
8	8_50351880	0	50351880	G G	G G	A A	A G	G G	A G	A A	A A	A G	A A	G G	A G	A A	A G	A G	A A	G G	A A	G G	A G	A G	A G	A G	G G	G G	A G	A G	A G	G G	G G	G G	A A
8	8_50455579	0	50455579	C T	T T	T T	T T	T T	T T	T T	T T	T T	T T	T T	T T	T T	T T	T T	T T	T T	T T	T T	T T	T T	T T	T T	T T	T T	T T	T T	T T	T T	T T	T T	T T
8	8_50503611	0	50503611	C T	T T	T T	C C	T T	C C	T T	T T	T T	T T	C C	C C	T T	C C	C T	C T	C C	T T	C T	T T	T T	C C	T T	C C	T T	C T	C T	T T	C T	C T	C T	C T
8	8_50668497	0	50668497	C C	C C	T T	T T	C C	T T	T T	T T	C T	T T	T T	T T	T T	T T	T T	T T	T T	T T	C T	C T	C T	T T	C T	T T	C C	T T	T T	C T	C T	C T	C T	T T
8	8_50693228	0	50693228	T T	T T	T T	G G	T T	G G	T T	T T	T T	T T	G G	G G	T T	G G	G T	G T	G G	T T	G T	T T	T T	G G	T T	G G	T T	G T	G T	T T	G T	G T	G T	G T
8	8_50746296	0	50746296	T T	T G	G G	G G	T G	G G	G G	G G	T G	G G	G G	G G	G G	G G	G G	G G	G G	G G	T G	G G	G G	T G	T G	G G	T T	G G	G G	G G	T G	T G	T G	G G
8	8_50777713	0	50777713	C C	C T	T T	C T	C T	C C	T T	T T	C C	T T	T T	C T	T T	C T	T T	C T	T T	T T	C C	T T	T T	C T	C C	T T	C C	C T	C T	T T	C T	C C	C C	C C
8	8_50777790	0	50777790	G T	G T	T T	T T	G T	T T	T T	T T	G T	T T	T T	T T	T T	T T	T T	T T	T T	T T	G T	T T	T T	T T	G T	T T	G G	T T	T T	T T	G T	G T	G T	T T
8	8_50820999	0	50820999	A G	A G	G G	G G	A G	G G	G G	G G	A G	G G	G G	G G	G G	G G	G G	G G	G G	G G	A G	G G	G G	G G	A G	G G	A A	G G	G G	G G	A G	A G	A G	G G
8	8_50863951	0	50863951	C C	C C	C C	T C	C C	T T	C C	C C	C C	C C	C C	T C	C C	T C	C C	T C	C C	C C	C C	C C	C C	C C	C C	C C	C C	C C	T C	C C	C C	C C	T C	T C
8	8_50903367	0	50903367	G G	G A	G G	G A	G A	G G	G G	G G	G A	G G	A A	G A	G A	G A	A A	G A	A A	G A	G A	A A	G A	G A	G A	A A	G G	A A	G A	G A	G A	G A	G G	G A
8	8_50943234	0	50943234	T T	T C	T T	T C	T C	T T	T T	T T	T C	T T	C C	T C	T C	T C	C C	T C	C C	T C	T C	C C	T C	T C	T C	C C	T T	C C	T C	T C	T C	T C	T T	T C
8	8_51003351	0	51003351	T C	T T	C C	T C	T T	C C	C C	C C	T C	C C	T T	T C	T C	T C	T C	C C	T T	C C	T C	T C	T C	T C	T C	T T	T T	T C	C C	T C	T T	T C	T C	C C
8	8_51004662	0	51004662	C C	C C	C C	A C	C C	A C	C C	C C	A C	C C	C C	A C	C C	A C	A C	A A	C C	A C	C C	C C	C C	C C	A C	C C	C C	A C	A C	C C	C C	C C	C C	A A
8	8_51065161	0	51065161	T C	T T	C C	T C	T T	C C	C C	C C	T C	C C	T T	T C	T C	T C	T C	C C	T T	T C	T C	T T	T C	T C	T C	T T	T T	T C	C C	T T	T T	T C	T C	C C
8	8_51078939	0	51078939	G G	G G	G G	A G	G G	A G	G G	G G	A G	G G	G G	A G	G G	A G	A G	A A	G G	A G	A G	G G	G G	A G	A G	G G	G G	A G	A G	G G	G G	A G	G G	A A
8	8_51169284	0	51169284	G A	G A	A A	A A	G A	G A	A A	A A	G A	A A	A A	A A	G A	A A	A A	A A	A A	A A	G G	A A	A A	A A	G A	A A	G G	A A	G A	A A	G A	G G	G G	A A
8	8_51169299	0	51169299	C T	C T	T T	T T	C T	C T	T T	T T	C T	T T	T T	T T	C T	T T	T T	T T	T T	T T	C C	T T	T T	T T	C T	T T	C C	T T	C T	T T	C T	C C	C C	T T
8	8_51219702	0	51219702	T T	T T	T T	C T	T T	C T	T T	T T	C T	T T	T T	C T	T T	C T	T T	C T	T T	T T	T T	T T	T T	C T	C T	T T	T T	C T	T T	T T	T T	T T	T T	C C
8	8_51219776	0	51219776	G G	G G	G G	A G	G G	A G	G G	G G	A G	G G	G G	A G	G G	A G	G G	A G	G G	G G	G G	G G	G G	A G	A G	G G	G G	A G	G G	G G	G G	G G	G G	A A
8	8_51290356	0	51290356	T C	C C	C C	T C	C C	T C	T T	T T	T C	T T	C C	T C	T C	T C	T C	T T	C C	T C	T C	T C	T C	T T	T C	C C	C C	T C	T C	C C	C C	T C	C C	T T
8	8_51324850	0	51324850	A A	A A	C C	A C	A A	C C	C C	C C	A C	C C	A A	A C	C C	A C	A C	C C	A A	A C	A C	A C	A C	C C	A C	A A	A A	A C	C C	A A	A C	A C	A C	C C
8	8_51325173	0	51325173	G G	G G	A A	G G	G G	G G	A A	A A	G G	A A	G G	G G	A A	G G	A G	A G	G G	A G	A G	A G	A G	A G	G G	G G	G G	G G	A G	G G	G G	A G	G G	G G
8	8_51357718	0	51357718	T T	T T	0 0	C T	T T	C T	T T	T T	T T	T T	T T	C T	T T	C T	T T	C T	T T	T T	T T	T T	T T	T T	T T	T T	T T	T T	T T	T T	T T	T T	T T	C T
8	8_51363376	0	51363376	C T	C C	T T	C T	C C	T T	T T	T T	C T	T T	C C	C T	T T	C T	C T	T T	C C	T T	C T	C T	C T	T T	C T	C C	C C	C T	T T	C T	C T	C T	C T	T T
8	8_51403017	0	51403017	G A	A A	A A	G A	A A	G A	A A	A A	A A	A A	A A	G A	A A	G A	A A	G A	A A	A A	A A	G A	A A	A A	A A	A A	A A	A A	A A	A A	G A	A A	A A	G A
8	8_51463126	0	51463126	A A	A A	G G	A A	A A	A A	A A	A A	G A	A A	A A	A A	A A	A A	A A	A A	A A	G A	A A	G A	A A	A A	G A	A A	A A	G A	A A	G A	G A	A A	A A	G A
8	8_51466459	0	51466459	G G	G G	A A	G G	G G	G G	G G	G G	A G	G G	G G	G G	G G	G G	G G	G G	G G	A G	G G	A G	G G	G G	A G	G G	G G	A G	G G	A G	A G	G G	G G	A G
8	8_51466994	0	51466994	A A	A A	G G	A A	A A	A A	A A	A A	G A	A A	A A	A A	A A	A A	A A	A A	A A	A A	A A	G A	A A	A A	G A	A A	A A	G A	A A	A A	G A	A A	A A	G A
8	8_51482770	0	51482770	G G	G A	G G	A A	G A	G A	A A	A A	G G	A A	A A	A A	G A	A A	A A	A A	A A	G A	G A	G A	A A	G A	G G	A A	G G	G A	G A	G A	G G	G A	G G	G A
8	8_51512953	0	51512953	C C	C C	T T	T C	C C	T T	T T	T T	T C	T T	C C	T C	T C	T C	T C	T T	C C	T T	C C	T C	T C	C C	T C	C C	C C	T C	T T	T C	T C	C C	T C	T T
8	8_51513207	0	51513207	T T	T T	C C	C T	T T	C C	C C	C C	C T	C C	T T	C T	C T	C T	C T	C C	T T	C C	T T	C T	C T	T T	C T	T T	T T	C T	C C	C T	C T	T T	C T	C C
8	8_51513423	0	51513423	A A	A A	C C	C A	A A	C C	C C	C C	C A	C C	A A	C A	C A	C A	C A	C C	A A	C C	A A	C A	C A	A A	C A	A A	A A	C A	C C	C A	C A	A A	C A	C C
8	8_51519949	0	51519949	T T	T T	T T	G T	T T	G T	G G	G G	T T	G G	T T	G T	G T	G T	T T	G T	T T	T T	T T	T T	G T	G T	T T	T T	T T	T T	T T	T T	T T	T T	T T	G T
8	8_51551398	0	51551398	A G	A G	G G	A G	A G	A G	A A	A A	A G	A A	G G	A G	A G	A G	G G	A G	G G	G G	A G	G G	A G	G G	A G	G G	A A	G G	G G	G G	A G	A G	A G	A G
8	8_51551764	0	51551764	A G	A G	G G	A G	A G	A G	A A	A A	A G	A A	G G	A G	A G	A G	G G	A G	G G	G G	A G	G G	A G	G G	A G	G G	A A	G G	G G	G G	A G	A G	A G	A G
8	8_51653890	0	51653890	A G	G G	G G	G G	G G	G G	G G	G G	G G	G G	G G	G G	A G	G G	G G	G G	G G	G G	G G	G G	G G	G G	G G	G G	G G	G G	G G	G G	G G	G G	G G	G G
8	8_51698367	0	51698367	G G	G G	A A	G G	G G	G G	G G	G G	G G	G G	G G	G G	G G	G G	G G	G G	G G	G G	G G	G G	G G	G G	G G	G G	G G	G G	G G	G G	G G	G G	G G	G G
8	8_51768122	0	51768122	T T	T T	T T	T T	T T	T T	T T	T T	T T	T T	T T	T T	C T	T T	C T	C T	T T	C T	T T	T T	T T	T T	T T	T T	T T	T T	C T	T T	T T	T T	T T	T T
8	8_51810753	0	51810753	T T	C T	C T	C T	C T	C T	T T	T T	T T	T T	C C	C T	C T	C T	C C	C T	C C	C T	C T	C T	C T	C T	T T	C C	T T	C T	C C	T T	C T	C T	C T	T T
8	8_51853981	0	51853981	C C	C C	C C	C C	C C	C C	C C	C C	C C	C C	C C	C C	T C	C C	T C	T C	C C	T C	C C	C C	C C	C C	C C	C C	C C	C C	T C	C C	C C	C C	C C	C C
8	8_51857783	0	51857783	C C	C C	T C	T C	C C	T C	C C	C C	C C	C C	C C	T C	T C	T C	T C	T T	C C	T C	C C	C C	C C	T C	C C	C C	C C	C C	T C	C C	C C	C C	C C	T C
8	8_51925103	0	51925103	C A	A A	A A	A A	A A	A A	C C	C C	A A	C C	A A	A A	C C	A A	C A	C A	A A	C A	A A	A A	C A	A A	A A	A A	A A	A A	C A	A A	A A	A A	A A	A A
8	8_51925183	0	51925183	A G	G G	G G	G G	G G	G G	A A	A A	G G	A A	G G	G G	A A	G G	A G	A G	G G	A G	G G	G G	A G	G G	G G	G G	G G	G G	A G	G G	G G	G G	G G	G G
8	8_52005343	0	52005343	C T	T T	T T	T T	T T	T T	T T	T T	C T	T T	T T	T T	C T	T T	T T	T T	T T	T T	T T	T T	T T	T T	C T	T T	T T	C T	T T	T T	T T	T T	T T	C T
8	8_52012377	0	52012377	C T	T T	C T	C T	T T	C T	T T	T T	C T	T T	T T	C T	C T	C T	T T	C T	T T	T T	T T	T T	T T	C T	C T	T T	T T	C T	T T	T T	T T	T T	T T	C C
8	8_52036472	0	52036472	G G	G G	G G	G G	G G	G G	G G	G G	A G	G G	G G	G G	A G	G G	G G	G G	G G	G G	G G	G G	G G	G G	A G	G G	G G	A G	G G	G G	G G	G G	G G	A G
8	8_52160617	0	52160617	G G	G G	G G	G G	G G	G G	G G	G G	G G	G G	G G	G G	G G	G G	G G	G G	G G	G G	G G	A G	G G	G G	G G	G G	G G	G G	G G	G G	G G	G G	G G	G G
8	8_52166005	0	52166005	G G	G G	A G	A G	G G	A G	A A	A A	G G	A A	G G	A G	A G	A G	A G	A A	G G	A G	G G	G G	A G	G G	G G	G G	G G	G G	A G	G G	G G	G G	G G	A G
8	8_52274431	0	52274431	G G	G G	T G	T G	G G	T G	T T	T T	T G	T T	G G	T G	T T	T G	T G	T T	G G	T T	G G	T G	T G	T G	T G	G G	G G	T G	T G	T G	G G	G G	G G	T T
8	8_52309767	0	52309767	C C	C C	T C	T C	C C	T C	T T	T T	T C	T T	C C	T C	T T	T C	T C	T T	C C	T T	C C	T C	T C	T C	T C	C C	C C	T C	T C	T C	C C	C C	C C	T T
8	8_52379848	0	52379848	T C	C C	T C	T C	C C	T C	T T	T T	T C	T T	C C	T C	T T	T C	T C	T T	C C	T T	C C	T C	T C	T C	T C	C C	C C	T C	T C	T C	C C	C C	C C	T T
8	8_52383213	0	52383213	C C	C C	C C	C C	C C	C C	C C	C C	A C	C C	C C	C C	A C	C C	C C	C C	C C	C C	C C	C C	C C	C C	A C	C C	C C	A C	C C	C C	C C	C C	C C	A C
8	8_52439092	0	52439092	A A	A A	A A	A A	A A	A A	A A	A A	G A	A A	A A	A A	G A	A A	A A	A A	A A	A A	A A	A A	A A	A A	G A	A A	A A	G A	A A	A A	A A	A A	A A	G A
8	8_52515733	0	52515733	A G	G G	A G	A G	G G	A G	A A	A A	A G	A A	G G	A G	A A	A G	A G	A A	G G	A A	G G	A G	A G	A G	A G	G G	G G	A G	A G	A G	G G	G G	G G	A A
8	8_52549072	0	52549072	T T	T T	T T	T T	T T	T T	T T	T T	C T	T T	T T	T T	T T	T T	T T	T T	T T	T T	T T	T T	T T	T T	C T	T T	T T	C T	T T	T T	T T	T T	T T	C T
8	8_52583464	0	52583464	G G	G G	G G	G G	G G	G G	G G	G G	T G	G G	G G	G G	T G	G G	G G	G G	G G	T G	G G	T G	G G	T G	T G	G G	G G	T G	G G	T G	G G	G G	G G	T G
8	8_52608961	0	52608961	G G	G G	G G	G G	G G	G G	G G	G G	G G	G G	G G	G G	A G	G G	G G	G G	G G	G G	G G	G G	G G	G G	G G	G G	G G	G G	G G	G G	G G	G G	G G	G G
8	8_52652862	0	52652862	T C	C C	T C	T C	C C	T C	T T	T T	T C	T T	C C	T C	T T	T C	T C	T T	C C	T C	C C	C C	T C	C C	T C	C C	C C	T C	T C	C C	C C	C C	C C	T T
8	8_52661375	0	52661375	C T	T T	T T	T T	T T	T T	C C	C C	T T	C C	T T	T T	C C	T T	T T	T T	T T	C T	T T	C T	C T	T T	T T	T T	T T	T T	T T	C T	T T	T T	T T	T T
8	8_52777837	0	52777837	C C	C C	C C	C C	C C	C C	C C	C C	C C	C C	C C	C C	C C	C C	C C	C C	C C	C C	C C	C C	C C	T C	C C	C C	C C	C C	C C	C C	C C	C C	C C	C C
8	8_52798142	0	52798142	C C	C C	C C	C C	C C	T C	C C	C C	C C	C C	C C	C C	C C	C C	C C	C C	C C	T C	C C	C C	C C	T C	C C	C C	C C	C C	C C	T C	C C	C C	C C	T C
8	8_52800418	0	52800418	A A	A A	A A	A A	A A	A A	A A	A A	A A	A A	A A	A A	A A	A A	A A	A A	A A	A A	A A	G A	A A	A A	A A	A A	A A	A A	A A	A A	A A	A A	A A	A A
8	8_52848642	0	52848642	A G	A G	G G	G G	A G	G G	A A	A A	A G	A A	G G	G G	A G	G G	G G	G G	G G	G G	A A	A G	A G	G G	A G	G G	A A	G G	G G	A G	A G	A A	A G	G G
8	8_52949581	0	52949581	G G	G G	G G	G G	G G	A G	G G	G G	G G	G G	G G	G G	G G	G G	G G	G G	G G	A G	G G	G G	G G	A G	G G	G G	G G	G G	G G	A G	G G	G G	G G	A G
8	8_53004652	0	53004652	T T	T T	T T	T T	T T	T T	C T	C C	T T	C T	T T	T T	C T	T T	T T	T T	C T	T T	T T	T T	C T	T T	T T	C T	T T	T T	T T	T T	T T	T T	T T	T T
8	8_53037020	0	53037020	C T	C T	T T	T T	C T	T T	C T	T T	C T	C T	T T	T T	C T	T T	T T	T T	T T	T T	C C	C T	T T	T T	C T	T T	C C	T T	T T	C T	C T	C C	C T	T T
8	8_53080236	0	53080236	G A	A A	G A	A A	A A	A A	A A	A A	A A	A A	A A	A A	A A	A A	G A	G A	A A	G A	A A	A A	A A	A A	A A	A A	A A	A A	G A	A A	A A	A A	A A	A A
8	8_53083381	0	53083381	G T	T T	G T	T T	T T	T T	T T	T T	T T	T T	T T	T T	T T	T T	G T	G T	T T	G T	T T	T T	T T	T T	T T	T T	T T	T T	G T	T T	T T	T T	T T	T T
8	8_53235600	0	53235600	T C	C C	T C	T C	C C	T C	C C	C C	C C	C C	C C	T C	C C	T C	T C	T T	C C	T T	C C	T C	C C	T C	C C	C C	C C	C C	T C	T C	C C	C C	C C	T C
8	8_53466180	0	53466180	A A	A A	A A	A A	A A	A A	A A	A A	G A	A A	A A	A A	A A	A A	A A	A A	A A	A A	G A	A A	A A	A A	G A	A A	A A	G A	A A	A A	G A	G A	A A	G A
8	8_53469749	0	53469749	A G	A G	G G	G G	A G	A G	A A	A A	A G	A A	G G	G G	A G	G G	G G	G G	A G	G G	A G	A G	A G	G G	A G	A G	A A	G G	G G	A G	A G	A G	A G	A G
8	8_53550182	0	53550182	C T	T T	C T	T T	T T	T T	T T	T T	T T	T T	T T	T T	T T	T T	T T	T T	T T	T T	T T	T T	T T	T T	T T	T T	T T	T T	T T	T T	T T	T T	T T	T T
8	8_53594849	0	53594849	G G	G G	G G	G G	G G	G G	A G	A A	A G	A G	G G	G G	G G	A G	A G	A A	A G	A G	G G	A G	A G	G G	A G	A G	G G	A G	A G	G G	G G	G G	G G	A G
8	8_53610527	0	53610527	C T	C T	C C	C T	C T	C T	T T	T T	T T	T T	C C	C T	T T	C T	C T	T T	C T	C T	C T	T T	C T	C T	T T	C T	T T	C T	C T	C T	C T	C T	C T	T T
8	8_53612280	0	53612280	A G	G G	A G	G G	G G	G G	G G	G G	G G	G G	G G	G G	G G	G G	G G	G G	G G	G G	G G	G G	G G	G G	G G	G G	G G	G G	G G	G G	G G	G G	G G	G G
8	8_53622081	0	53622081	T G	T G	G G	G G	T G	T G	T T	T T	T G	T T	G G	G G	T G	T G	G G	T G	T G	G G	T G	T T	T G	G G	T G	T G	T T	G G	G G	T G	T G	T G	T G	T G
8	8_53636613	0	53636613	C C	T C	T C	T C	T C	T C	C C	C C	C C	C C	T T	T C	C C	T C	T C	C C	T C	T C	C C	C C	T C	T C	C C	T C	C C	T C	T C	T C	C C	C C	T C	C C
8	8_53648422	0	53648422	G T	G T	T T	T T	G T	G T	G T	T T	G T	G T	T T	T T	G G	T T	T T	T T	T T	T T	G T	G T	T T	T T	G T	T T	G G	T T	T T	G T	G T	G T	G T	G T
8	8_53676953	0	53676953	C T	C T	C C	C T	C T	C T	C T	C C	T T	C T	C C	C T	C T	C C	C T	C T	C C	C T	T T	C T	C C	C T	T T	C C	T T	C T	C T	C T	T T	T T	C T	T T
8	8_53699059	0	53699059	C T	C T	C C	C T	C T	C T	T T	T T	T T	T T	C C	C T	T T	C T	C T	T T	C T	C T	T T	T T	C T	C T	T T	C T	T T	C T	C T	C T	T T	T T	C T	T T
8	8_53709819	0	53709819	T T	T T	T T	T T	T T	T T	T T	T T	T T	T T	T T	T T	T T	T T	T T	T T	T T	T T	T T	C T	T T	T T	T T	T T	T T	T T	T T	T T	T T	T T	T T	T T
8	8_53749645	0	53749645	T T	0 0	T T	T T	T T	T T	C T	C C	T T	C T	T T	T T	T T	C T	T T	C T	C T	T T	T T	T T	C T	T T	T T	C T	T T	T T	T T	T T	T T	T T	T T	T T
8	8_53749659	0	53749659	T T	T T	T T	T T	T T	T T	C T	C C	T T	C T	T T	T T	C T	C T	T T	C T	C T	T T	T T	T T	C T	T T	T T	C T	T T	T T	T T	T T	T T	T T	T T	T T
8	8_53808560	0	53808560	T T	T T	T T	C T	T T	T T	T T	T T	C T	T T	T T	C T	T T	T T	T T	T T	T T	T T	C T	T T	T T	T T	C T	T T	T T	C T	T T	T T	C T	C T	T T	C T
8	8_53811921	0	53811921	G G	G G	G G	A G	G G	G G	G G	G G	A G	G G	G G	A G	G G	G G	G G	G G	G G	G G	A G	G G	G G	G G	A G	G G	G G	A G	G G	G G	A G	A G	G G	A G
8	8_53878075	0	53878075	A G	G G	A G	G G	G G	G G	A G	A A	G G	A G	G G	G G	G G	A G	G G	A G	A G	G G	G G	G G	A G	G G	G G	A G	G G	G G	G G	G G	G G	G G	G G	G G
8	8_53941046	0	53941046	C T	C T	C C	C T	C T	C T	C T	C C	T T	C T	C C	C T	T T	C C	T T	C T	C C	C T	T T	T T	C C	C C	T T	C C	T T	C T	C T	C T	T T	T T	C T	T T
8	8_54047410	0	54047410	T T	C T	C T	C T	C T	C T	T T	T T	T T	T T	C C	C T	T T	C T	T T	T T	C T	C T	T T	C T	C T	C C	T T	C T	T T	C T	C T	C T	T T	T T	C T	T T
8	8_54062487	0	54062487	G G	A G	A G	A A	A G	A G	G G	G G	G G	G G	A A	A A	A G	A G	A A	A G	A G	A A	G G	A G	A G	A A	G G	A G	G G	A G	A A	A G	G G	G G	A G	G G
8	8_54131804	0	54131804	C C	C C	C C	T C	C C	C C	C C	C C	C C	C C	C C	T C	T C	C C	T T	T C	C C	T C	C C	C C	C C	C C	C C	C C	C C	C C	T C	C C	C C	C C	C C	C C
8	8_54212858	0	54212858	C C	C C	C C	C C	C C	C C	C C	C C	C C	C C	C C	C C	C C	C C	C C	C C	C C	C C	C C	C C	C C	C C	C C	C C	C C	C C	C C	C C	C C	C C	C C	C C
8	8_54238136	0	54238136	G G	A G	A G	A A	A G	A G	G G	G G	G G	G G	A A	A A	G G	A G	A G	G G	A G	A G	A G	A G	A G	A A	G G	A G	G G	A G	A G	A G	A G	A G	A G	G G
8	8_54254020	0	54254020	G G	G G	G G	A G	G G	G G	G G	G G	A G	G G	G G	A G	G G	G G	A G	G G	G G	G G	A G	G G	G G	G G	A G	G G	G G	A G	G G	G G	A G	A G	G G	A G
8	8_54304080	0	54304080	A A	A A	A A	G G	A A	A A	A A	A A	G A	A A	0 0	G G	A A	A A	G A	A A	A A	A A	G A	A A	A A	0 0	G A	A A	A A	G G	A A	A A	G A	G A	A A	G A
8	8_54308044	0	54308044	C C	C T	C T	T T	C T	C T	C C	C C	C T	C C	T T	T T	C C	C T	C T	C C	C T	C T	C T	C T	C T	T T	C T	C T	C C	T T	C T	C T	C T	C T	C T	C T
8	8_54308232	0	54308232	G G	G A	G A	A A	G A	G A	G G	G G	G A	G G	A A	A A	G G	G A	G A	G G	G A	G A	G A	G A	G A	A A	G A	G A	G G	A A	G A	G A	G A	G A	G A	G A
8	8_54308587	0	54308587	T T	T T	T T	T T	T T	T T	T T	T T	T T	T T	T T	T T	T T	T T	C T	T T	T T	T T	T T	T T	T T	T T	T T	T T	T T	T T	T T	T T	T T	T T	T T	T T
8	8_54358286	0	54358286	T T	T T	0 0	C T	T T	T T	C T	C C	T T	C T	T T	C T	C T	C T	C T	C C	C T	C T	C T	T T	C T	T T	T T	C T	T T	T T	C T	T T	C T	C T	T T	T T
8	8_54358480	0	54358480	G G	G G	T G	T G	G G	G G	T G	T T	G G	T G	G G	T G	T G	T G	T G	T T	T G	T G	T G	G G	T G	G G	G G	T G	G G	G G	T G	G G	T G	T G	G G	G G
8	8_54370157	0	54370157	T T	T T	T T	T T	T T	T T	T T	T T	T T	T T	T T	T T	T T	T T	T T	T T	T T	T T	T T	T T	T T	T T	T T	T T	T T	T T	T T	T T	T T	T T	T T	T T
8	8_54385138	0	54385138	T T	T C	C C	C C	T C	T C	T C	C C	T C	T C	C C	C C	T C	C C	C C	C C	C C	C C	T C	T C	C C	C C	T C	C C	T T	C C	C C	T C	T C	T C	T C	T C
8	8_54385497	0	54385497	A A	A G	G G	G G	A G	A G	A G	G G	A G	A G	G G	G G	A G	G G	G G	G G	G G	G G	A G	A G	G G	G G	A G	G G	A A	G G	G G	A G	A G	A G	A G	A G
8	8_54385536	0	54385536	A A	A G	G G	G G	A G	A G	A G	G G	A G	A G	G G	G G	A G	G G	G G	G G	G G	G G	A G	A G	G G	G G	A G	G G	A A	G G	G G	A G	A G	A G	A G	A G
8	8_54415575	0	54415575	G G	G G	A G	A G	G G	G G	A G	A A	G G	A G	G G	A G	G G	A G	A G	A A	A G	A G	A G	G G	A G	G G	G G	A G	G G	G G	A G	G G	A G	A G	G G	G G
8	8_54469902	0	54469902	G G	G G	T G	T G	G G	G G	T G	T T	G G	T G	G G	T G	T G	T G	T G	T T	T G	T G	T G	G G	T G	G G	G G	T G	G G	G G	T G	G G	T G	T G	G G	G G
8	8_54523047	0	54523047	T T	T T	C T	C T	T T	T T	C T	C C	C T	C T	T T	C T	C T	C T	C T	C C	C T	C T	C T	T T	C T	T T	C T	C T	T T	C T	C T	T T	C T	C T	T T	C T
8	8_54569959	0	54569959	C C	C C	T C	T C	C C	C C	T C	T T	T C	T C	C C	T C	T C	T C	T C	T T	T C	T C	T C	C C	T C	C C	T C	T C	C C	T C	T C	C C	T C	T C	C C	T C
8	8_54577134	0	54577134	G A	A A	A A	A A	A A	A A	A A	A A	A A	A A	A A	A A	A A	A A	A A	A A	A A	A A	A A	A A	A A	A A	A A	A A	A A	A A	A A	A A	A A	A A	A A	A A
8	8_54599814	0	54599814	G G	G G	G G	G G	G G	G G	G G	G G	G G	G G	G G	G G	G G	G G	G G	G G	G G	G G	G G	A G	G G	G G	G G	G G	G G	G G	G G	G G	G G	G G	G G	G G
8	8_54600971	0	54600971	T G	G G	G G	G G	G G	G G	G G	G G	G G	G G	G G	G G	G G	G G	G G	G G	G G	G G	G G	G G	G G	G G	G G	G G	G G	G G	G G	G G	G G	G G	G G	G G
8	8_54696211	0	54696211	G A	A A	G A	G A	A A	A A	G A	G G	G A	G A	A A	G A	A A	G A	G A	G G	G A	G A	G A	A A	G A	A A	G A	G A	A A	G A	G A	A A	G A	G A	A A	G A
8	8_54736214	0	54736214	A C	A C	C C	C C	A C	A C	A C	C C	A C	A C	C C	C C	A A	C C	A C	C C	C C	C C	A C	A A	C C	C C	A C	C C	A A	C C	C C	A C	A C	A C	A C	A C
8	8_54797132	0	54797132	G T	G T	T T	T T	G T	G T	G T	T T	G T	G T	T T	T T	G T	T T	G T	T T	T T	T T	G T	G T	T T	T T	G T	T T	G G	T T	T T	G T	G T	G T	G T	G T
8	8_54884730	0	54884730	C C	T C	T C	T T	T C	T C	C C	C C	C C	C C	T T	T T	C C	T C	T C	C C	T C	T C	C C	T C	T C	T T	C C	T C	C C	T C	T C	T C	C C	C C	T C	C C
8	8_54943298	0	54943298	A C	A C	A C	A A	A C	A C	C C	C C	A C	C C	A A	A A	A C	A C	A C	C C	A C	A C	C C	A C	A C	A A	A C	A C	C C	A A	A C	A C	C C	C C	A C	A C
8	8_55002373	0	55002373	A A	A A	G A	A A	A A	A A	G A	G G	A A	G A	A A	A A	A A	G A	G A	G G	G A	G A	G A	A A	G A	A A	A A	G A	A A	A A	G A	A A	G A	G A	A A	A A
8	8_55006387	0	55006387	G G	G G	A G	G G	G G	G G	A G	A A	G G	A G	G G	G G	G G	A G	A G	A A	A G	A G	A G	G G	A G	G G	G G	A G	G G	G G	A G	G G	A G	A G	G G	G G
8	8_55065831	0	55065831	A A	A A	G G	0 0	A A	G A	G A	G G	A A	G A	0 0	0 0	G A	G G	G G	G G	G G	G G	G A	A A	G G	0 0	A A	G G	A A	A A	G G	A A	G A	G A	G A	A A
8	8_55065887	0	55065887	A A	A A	C C	0 0	A A	C A	C A	C C	A A	C A	0 0	0 0	C A	C C	C C	C C	C C	C C	C A	A A	C C	0 0	A A	C C	A A	A A	C C	A A	C A	C A	C A	A A
8	8_55145728	0	55145728	G G	G G	G G	G G	G G	G G	A G	A A	G G	A G	G G	G G	G G	A G	G G	A G	A G	G G	A G	G G	A G	G G	G G	A G	G G	G G	G G	G G	A G	A G	G G	G G
8	8_55281094	0	55281094	G A	A A	A A	G A	A A	A A	A A	A A	A A	A A	A A	G A	G A	A A	G A	G A	A A	G A	A A	A A	A A	A A	A A	A A	A A	A A	G A	A A	G A	A A	A A	A A
8	8_55286871	0	55286871	G T	T T	T T	G T	T T	T T	T T	T T	T T	T T	T T	G T	G T	T T	G T	G T	T T	G T	T T	T T	T T	T T	T T	T T	T T	T T	G T	T T	G T	T T	T T	T T
8	8_55319327	0	55319327	A G	G G	G G	A G	G G	G G	G G	G G	G G	G G	G G	A G	A G	G G	A G	A G	G G	A G	G G	G G	G G	G G	G G	G G	G G	G G	A G	G G	A G	G G	G G	G G
8	8_55502433	0	55502433	0 0	G G	G G	A G	G G	G G	A G	A A	G G	A G	G G	A G	A G	A G	A G	A A	A G	A G	G G	G G	A G	G G	G G	A G	G G	G G	A G	G G	A G	G G	G G	G G
8	8_55514353	0	55514353	A A	A A	A A	A A	A A	G A	A A	A A	A A	A A	A A	A A	A A	A A	A A	A A	A A	A A	A A	A A	A A	A A	A A	A A	A A	A A	G A	A A	A A	A A	G A	A A
8	8_55518413	0	55518413	G G	G G	G G	G G	G G	A G	G G	G G	G G	G G	G G	G G	G G	G G	G G	G G	G G	G G	G G	G G	G G	G G	G G	G G	G G	G G	A G	G G	G G	G G	A G	G G
8	8_55588814	0	55588814	C T	T T	T T	C T	T T	T T	T T	T T	C T	T T	T T	C T	T T	T T	T T	T T	T T	T T	T T	T T	T T	T T	C T	T T	C T	C T	T T	T T	C T	T T	T T	C T
8	8_55600098	0	55600098	A G	G G	G G	A G	G G	G G	G G	G G	A G	G G	G G	A G	G G	G G	G G	G G	G G	G G	G G	G G	G G	G G	A G	G G	A G	A G	G G	G G	A G	G G	G G	A G
8	8_55753813	0	55753813	A G	A G	G G	G G	A G	A A	A A	A A	A G	A A	G G	G G	A A	A G	G G	A G	A G	G G	A G	A G	A G	G G	A G	A G	A G	G G	A G	A G	A G	A G	A A	A G
8	8_55783717	0	55783717	A G	A G	G G	G G	A G	A A	A A	A A	A G	A A	G G	G G	A A	A G	G G	A G	A G	G G	A G	A G	A G	G G	A G	A G	A G	G G	A G	A G	A G	A G	A A	A G
8	8_55836129	0	55836129	C C	C C	C C	T C	C C	C C	C C	C C	C C	C C	C C	T C	C C	C C	C C	C C	C C	C C	C C	C C	C C	C C	C C	C C	C C	C C	C C	C C	C C	C C	C C	C C
8	8_55852356	0	55852356	G G	G G	G G	A G	G G	G G	G G	G G	G G	G G	G G	A G	G G	G G	G G	G G	G G	G G	G G	G G	G G	G G	G G	G G	G G	G G	G G	G G	G G	G G	G G	G G
8	8_55890966	0	55890966	C C	C C	C C	T C	C C	T C	C C	C C	C C	C C	C C	T C	C C	C C	C C	C C	C C	C C	C C	C C	C C	C C	C C	C C	C C	C C	T C	C C	C C	C C	T C	C C
8	8_55947206	0	55947206	C C	C C	C C	T C	C C	C C	C C	C C	C C	C C	C C	T C	C C	C C	C C	C C	C C	C C	C C	C C	C C	C C	C C	C C	C C	C C	C C	C C	C C	C C	C C	C C
8	8_55974524	0	55974524	T T	T T	G T	T T	T T	T T	T T	T T	T T	T T	T T	T T	G T	T T	T T	T T	T T	T T	T T	T T	T T	T T	T T	T T	T T	T T	T T	T T	G T	T T	T T	T T
8	8_56061694	0	56061694	T T	T T	C T	C T	T T	T T	C T	C C	T T	C T	C C	C T	T T	C C	C C	C C	C C	C C	C T	C T	C T	C T	T T	C C	T T	C T	C T	C T	T T	C T	T T	T T
8	8_56061976	0	56061976	C C	C C	T C	T C	C C	C C	T C	T T	C C	T C	T T	T C	C C	T T	T T	T T	T T	T T	T C	T C	T C	T C	C C	T T	C C	T C	T C	T C	C C	T C	C C	C C
8	8_56062000	0	56062000	A A	A A	C A	C A	A A	A A	C A	C C	A A	C A	C C	C A	A A	C C	C C	C C	C C	C C	C A	C A	C A	C A	A A	C C	A A	C A	C A	C A	A A	C A	A A	A A
8	8_56110793	0	56110793	G A	G A	G A	A A	G A	G A	G A	A A	G G	G A	A A	A A	G G	A A	A A	A A	A A	A A	G A	G A	A A	A A	G G	A A	G G	G A	A A	G A	G G	G A	G A	G G
8	8_56110899	0	56110899	C T	C T	C T	T T	C T	C T	C T	T T	C C	C T	T T	T T	C C	T T	T T	T T	T T	T T	C T	C T	T T	T T	C C	T T	C C	C T	T T	C T	C C	C T	C T	C C
8	8_56111129	0	56111129	G A	G A	G A	A A	G A	G A	G A	A A	G G	G A	A A	A A	G G	A A	A A	A A	A A	A A	G A	G A	A A	A A	G G	A A	G G	G A	A A	G A	G G	G A	G A	G G
8	8_56115677	0	56115677	G G	A G	G G	A G	A G	A G	G G	G G	G G	G G	G G	A G	G G	G G	G G	G G	G G	G G	G G	G G	A G	A G	G G	G G	G G	G G	A G	G G	G G	G G	A G	G G
8	8_56225773	0	56225773	G G	G G	A G	A G	G G	G G	A G	A A	G G	A G	G G	A G	A G	A G	A G	A G	A G	G G	G G	G G	A G	G G	G G	A G	G G	G G	G G	G G	A G	G G	G G	G G
8	8_56347223	0	56347223	A G	G G	A A	A G	G G	A G	G G	G G	G G	G G	A A	A G	A G	A G	A G	G G	A G	A G	A G	A G	G G	A G	G G	A G	G G	A G	A G	A G	A G	A G	A G	G G
8	8_56350297	0	56350297	C T	T T	C T	C T	T T	C T	T T	T T	T T	T T	C C	C T	T T	C T	T T	T T	C T	C T	C T	C T	T T	C T	T T	C T	T T	C T	C T	C T	T T	C T	C T	T T
8	8_56373688	0	56373688	C T	T T	C C	C T	T T	C T	T T	T T	T T	T T	C C	C T	C T	C T	C T	T T	C T	C T	C T	C T	T T	C T	T T	C T	T T	C T	C T	C T	C T	C T	C T	T T
8	8_56405792	0	56405792	T T	T T	C T	T T	T T	T T	T T	T T	T T	T T	T T	T T	C T	T T	T T	T T	T T	T T	T T	T T	T T	T T	T T	T T	T T	T T	T T	T T	C T	T T	T T	T T
8	8_56498516	0	56498516	C A	0 0	C C	C A	A A	C A	A A	A A	A A	A A	C C	C A	C A	C A	C A	A A	C A	C A	C A	C A	A A	C A	A A	C A	A A	C A	C A	C A	C A	C A	C A	A A
8	8_56509013	0	56509013	G G	G G	A G	G G	G G	G G	G G	G G	G G	G G	G G	G G	A G	G G	G G	G G	G G	G G	G G	G G	G G	G G	G G	G G	G G	G G	G G	G G	A G	G G	G G	G G
8	8_56546860	0	56546860	T G	G G	T G	T T	G G	T G	G G	G G	G G	G G	T T	T T	G G	T G	G G	G G	T G	T G	T G	T G	G G	G G	G G	T G	G G	T G	T G	T G	G G	T G	T G	G G
8	8_56555498	0	56555498	A G	G G	A A	A A	G G	A G	G G	G G	G G	G G	A A	A A	A G	A G	G G	G G	A G	A G	A G	A G	G G	G G	G G	A G	G G	A G	A G	A G	A G	A G	A G	G G
8	8_56595318	0	56595318	A G	G G	A A	A A	G G	A G	G G	G G	G G	G G	A A	A A	A G	A G	A A	A G	A G	A A	A G	A G	G G	A G	G G	A G	G G	A G	A A	A G	A G	A G	A G	G G
8	8_56644349	0	56644349	C C	C C	C C	T C	C C	C C	C C	C C	C C	C C	C C	T C	C C	C C	C C	C C	C C	C C	C C	C C	C C	C C	C C	C C	C C	C C	C C	C C	C C	C C	C C	C C
8	8_56694315	0	56694315	T C	C C	T C	C C	C C	C C	C C	C C	C C	C C	C C	C C	T C	C C	C C	C C	C C	C C	C C	C C	C C	T C	C C	C C	C C	C C	C C	C C	T C	C C	C C	C C
8	8_56704974	0	56704974	G G	A G	G G	G G	A G	G G	G G	G G	G G	G G	G G	G G	G G	G G	A G	G G	G G	G G	G G	G G	A G	A G	G G	G G	G G	G G	G G	G G	G G	G G	G G	G G
8	8_56748996	0	56748996	C C	C T	T T	C T	C T	C T	C T	T T	C C	C T	T T	C T	C T	T T	C T	C T	T T	C T	C T	C T	T T	C T	C C	T T	C C	C T	C T	C T	C T	C T	C T	C C
8	8_56755808	0	56755808	T C	C C	C C	T C	C C	C C	C C	C C	C C	C C	C C	T C	C C	C C	T C	T C	C C	T C	C C	C C	C C	T C	C C	C C	C C	C C	T C	C C	C C	C C	C C	C C
8	8_56792462	0	56792462	C T	C T	C T	C T	C T	T T	T T	T T	T T	T T	T T	C T	C T	T T	C C	C T	T T	C T	T T	T T	C T	C T	T T	T T	T T	T T	C T	T T	C T	T T	T T	T T
8	8_56855283	0	56855283	A G	G G	G G	G G	G G	G G	G G	G G	G G	G G	G G	G G	G G	G G	G G	G G	G G	G G	G G	G G	G G	G G	G G	G G	G G	G G	G G	G G	G G	G G	G G	G G
8	8_56884721	0	56884721	C C	C C	C C	C C	C C	C C	T C	T T	C C	T C	T C	C C	C C	T C	C C	T C	T C	C C	C C	C C	T C	T C	C C	T T	C C	C C	C C	C C	C C	C C	C C	C C
8	8_56941585	0	56941585	T T	C T	T T	C T	C T	C T	C C	C C	C T	C C	C T	C T	C T	C T	T T	C T	C T	T T	C T	C T	C T	T T	C T	C C	C T	T T	T T	T T	T T	C T	C T	C T
8	8_56984251	0	56984251	C C	C C	C C	C C	C C	C C	T C	T T	C C	T C	T C	C C	C C	T C	C C	T C	T C	C C	C C	C C	T C	C C	C C	T T	C C	C C	C C	C C	C C	C C	C C	C C
8	8_56987587	0	56987587	C C	C C	C C	C C	C C	C C	T C	T T	C C	T C	T C	C C	C C	T C	C C	T C	T C	C C	C C	C C	T C	C C	C C	T T	C C	C C	C C	C C	C C	C C	C C	C C
8	8_56996485	0	56996485	C C	C C	C C	T C	C C	C C	C C	C C	C C	C C	C C	T C	C C	C C	C C	C C	C C	C C	C C	C C	C C	C C	C C	C C	C C	C C	C C	C C	C C	C C	C C	C C
8	8_56996516	0	56996516	C T	T T	C T	C C	T T	C T	T T	T T	C T	T T	C T	C C	T T	C T	T T	T T	C T	C T	C T	C T	T T	T T	C T	T T	C T	C C	C T	C C	C T	C T	C T	C T
8	8_57030944	0	57030944	C C	C C	C C	C C	C C	C C	T C	T T	C C	T C	T C	C C	C C	T C	C C	T C	T C	C C	C C	C C	T C	C C	C C	T T	C C	C C	C C	C C	C C	C C	C C	C C
8	8_57062438	0	57062438	T C	T T	T C	C C	T T	T C	T C	C C	T C	T C	C C	C C	T T	C C	T C	C C	C C	C C	T C	T C	T C	T C	T C	C C	T C	C C	C C	C C	T C	T C	T C	T C
8	8_57077087	0	57077087	G T	G G	G T	G T	G G	G T	G T	T T	G T	G T	T T	G T	G G	T T	G G	G T	T T	G T	G T	G T	G T	G T	G T	T T	G T	T T	G T	T T	G T	G T	G T	G T
8	8_57088992	0	57088992	C C	C C	C C	T C	C C	C C	C C	C C	C C	C C	C C	T C	C C	C C	C C	C C	C C	C C	C C	C C	C C	C C	C C	C C	C C	C C	C C	C C	C C	C C	C C	C C
8	8_57140488	0	57140488	A A	A A	A A	G A	A A	A A	A A	A A	A A	A A	A A	G A	A A	A A	A A	A A	A A	A A	A A	A A	A A	A A	A A	A A	A A	A A	A A	A A	A A	A A	A A	A A
8	8_57147683	0	57147683	G G	G G	G G	A G	G G	G G	G G	G G	G G	G G	G G	A G	G G	G G	G G	G G	G G	G G	G G	G G	G G	G G	G G	G G	G G	G G	G G	G G	G G	G G	G G	G G
8	8_57272352	0	57272352	T T	0 0	0 0	G T	T T	T T	T T	T T	T T	T T	T T	G T	T T	T T	T T	T T	T T	T T	T T	T T	T T	T T	T T	T T	T T	T T	T T	T T	T T	T T	T T	T T
8	8_57288872	0	57288872	C T	T T	T T	T T	T T	T T	T T	T T	T T	T T	T T	T T	T T	T T	T T	T T	T T	T T	T T	T T	T T	T T	T T	T T	T T	T T	T T	T T	T T	T T	T T	T T
8	8_57318664	0	57318664	C C	C C	T C	T T	C C	T C	C C	C C	C C	C C	T C	T T	C C	T C	C C	C C	T C	T C	T C	T C	C C	C C	C C	C C	C C	T C	T C	T T	C C	T C	T C	C C
8	8_57387443	0	57387443	T C	C C	T C	T T	C C	T C	C C	C C	C C	C C	T C	T T	C C	T C	C C	C C	T C	T C	T C	T C	C C	C C	C C	C C	C C	T C	T C	T T	C C	T C	T C	C C
8	8_57417526	0	57417526	T T	T T	T T	T T	T T	T T	T T	T T	T T	T T	T T	T T	T T	T T	C C	C T	T T	C T	T T	T T	T T	T T	T T	T T	T T	T T	C T	T T	T T	T T	T T	T T
8	8_57486940	0	57486940	G G	G G	A G	A A	G G	A G	G G	G G	G G	G G	A G	A A	G G	A G	G G	G G	A G	A G	A G	A G	G G	A G	G G	G G	G G	A G	A G	A A	G G	A G	A G	G G
8	8_57500968	0	57500968	C C	C C	T C	T T	C C	T C	C C	C C	C C	C C	T C	T T	C C	T C	C C	C C	T C	T C	T C	T C	C C	C C	C C	C C	C C	T C	T C	T T	C C	T C	T C	C C
8	8_57517668	0	57517668	T T	T T	T T	T T	T T	T T	C T	C C	T T	C T	C T	T T	T T	C T	T T	C T	C T	T T	T T	T T	C T	T T	T T	C C	T T	T T	T T	T T	T T	T T	T T	T T
8	8_57551317	0	57551317	T T	T T	T T	T T	T T	T T	C T	C C	T T	C T	C T	T T	T T	C T	T T	C T	C T	T T	T T	T T	C T	T T	T T	C C	T T	T T	T T	T T	T T	T T	T T	T T
8	8_57618369	0	57618369	C C	A C	A C	C C	A C	C C	C C	C C	C C	C C	C C	C C	A C	C C	C C	C C	C C	C C	C C	C C	A C	A A	C C	C C	C C	C C	C C	C C	A C	C C	C C	C C
8	8_57672665	0	57672665	A A	A A	A A	G A	G A	A A	G A	G G	G A	G A	G A	G A	A A	G A	G A	G A	G A	A A	G A	A A	G G	G G	G A	G G	G A	G A	A A	G A	G A	G A	A A	G A
8	8_57677798	0	57677798	G G	G G	G G	A G	G G	G G	A G	A A	G G	A G	A G	A G	G G	A G	G G	A G	A G	G G	G G	G G	A G	G G	G G	A A	G G	G G	G G	G G	G G	G G	G G	G G
8	8_57725908	0	57725908	C C	C C	C C	T C	T C	C C	T C	T T	C C	T C	T C	T C	C C	T C	T C	T C	T C	C C	C C	C C	T T	T T	C C	T T	C C	C C	C C	C C	C C	C C	C C	C C
8	8_57756344	0	57756344	T T	T T	T T	C T	C T	T T	C T	C C	C T	C T	C T	C T	T T	C T	C T	C T	C T	T T	C T	T T	C C	C C	C T	C C	C T	C T	T T	C T	C T	C T	T T	C T
8	8_57796899	0	57796899	T T	T T	T T	C T	C T	T T	C T	C C	C T	C T	C T	C T	T T	C T	C T	C T	C T	T T	C T	T T	C C	C C	C T	C C	C T	C T	T T	C T	C T	C T	T T	C T
8	8_57798316	0	57798316	T T	T T	T T	C T	C T	T T	C T	C C	C T	C T	C T	C T	T T	C T	C T	C T	C T	T T	C T	T T	C C	C C	C T	C C	C T	C T	T T	C T	C T	C T	T T	C T
8	8_57901708	0	57901708	A A	A A	A A	A A	A A	A A	G A	G G	A A	G A	G A	A A	A A	G A	A A	G A	G A	A A	A A	A A	G A	A A	A A	G G	A A	A A	A A	A A	A A	A A	A A	A A
8	8_57915515	0	57915515	G A	A A	A A	G A	A A	A A	A A	A A	A A	A A	A A	G A	A A	A A	A A	A A	A A	A A	G A	A A	A A	A A	A A	A A	A A	A A	A A	G A	A A	G A	A A	A A
8	8_57966313	0	57966313	G A	A A	A A	A A	A A	A A	G A	G G	A A	G A	G A	A A	A A	G A	G A	G G	G A	G A	G A	A A	G A	A A	A A	G G	A A	A A	G A	G A	A A	G A	A A	A A
8	8_57979555	0	57979555	A A	A A	A A	G A	A A	A A	G A	G G	A A	G A	G A	G A	A A	G A	A A	G A	G A	A A	A A	A A	G A	A A	A A	G G	A A	A A	A A	A A	A A	A A	A A	A A
8	8_57984751	0	57984751	C C	C C	C C	C C	C C	C C	T C	T T	C C	T C	T C	C C	C C	T C	C C	T C	T C	C C	C C	C C	T C	C C	C C	T T	C C	C C	C C	C C	C C	C C	C C	C C
8	8_58001694	0	58001694	G A	A A	A A	A A	A A	A A	A A	A A	A A	A A	A A	A A	A A	A A	G A	G A	A A	G A	G A	A A	A A	A A	A A	A A	A A	A A	G A	G A	A A	G A	A A	A A
8	8_58033226	0	58033226	G G	G G	G G	G G	G G	G G	T G	T T	G G	T G	T G	G G	G G	T G	G G	T G	T G	G G	G G	G G	T G	G G	G G	T T	G G	G G	G G	G G	G G	G G	G G	G G
8	8_58034590	0	58034590	T T	T T	T T	T T	T T	T T	T T	T T	T T	T T	T T	T T	T T	T T	G T	G T	T T	G T	G T	T T	T T	T T	T T	T T	T T	T T	G T	G T	T T	G T	T T	T T
8	8_58143902	0	58143902	G G	G G	G G	G G	G G	G G	G G	G G	G G	G G	G G	G G	G G	G G	A G	A G	G G	A G	G G	G G	G G	G G	G G	G G	G G	G G	A G	G G	G G	G G	G G	G G
8	8_58197346	0	58197346	C C	C C	T T	C T	C C	C T	C T	T T	C T	C T	T T	C T	C T	T T	T T	T T	T T	T T	C C	C T	C T	C T	C T	T T	C T	T T	T T	C T	T T	C C	C T	C T
8	8_58232707	0	58232707	A A	A A	A A	A A	A A	A A	A A	A A	A A	A A	A A	A A	A A	A A	C A	C A	A A	C A	A A	A A	A A	A A	A A	A A	A A	A A	C A	A A	A A	A A	A A	A A
8	8_58262072	0	58262072	T T	T T	T T	T T	T T	T T	T T	T T	T T	T T	T T	T T	T T	T T	T T	T T	T T	T T	T T	T T	T T	T T	T T	T T	T T	T T	T T	T T	T T	T T	T T	T T
8	8_58273333	0	58273333	A G	A A	G G	G G	A G	A G	A G	G G	A G	A G	G G	G G	A G	G G	A G	A G	G G	A G	A G	A G	G G	G G	A G	G G	A G	G G	A G	G G	G G	A G	A G	A G
8	8_58341632	0	58341632	C C	C C	C C	T C	C C	C C	C C	C C	C C	C C	C C	T C	C C	C C	T C	C C	C C	C C	C C	C C	C C	C C	C C	C C	C C	C C	C C	C C	C C	C C	C C	C C
8	8_58375373	0	58375373	A A	A A	G A	G A	A A	G A	A A	A A	A A	A A	G A	G A	A A	G A	G A	G A	G A	G G	G A	G A	A A	G A	A A	A A	A A	G A	G G	G A	A A	G A	G A	A A
8	8_58410952	0	58410952	A A	A A	G A	G A	A A	G A	A A	A A	A A	A A	G A	G A	A A	G A	G A	G A	G A	G G	G A	G A	A A	G A	A A	A A	A A	G A	G G	G A	A A	G A	G A	A A
8	8_58411802	0	58411802	C C	C C	T C	T C	C C	T C	C C	C C	C C	C C	T C	T C	C C	T C	T C	T C	T C	T T	T C	T C	C C	T C	C C	C C	C C	T C	T T	T C	C C	T C	T C	C C
8	8_58471672	0	58471672	C C	C C	C C	C C	C C	C C	C C	C C	C C	C C	C C	C C	C C	C C	C C	C C	C C	T C	C C	C C	C C	C C	C C	C C	C C	C C	T C	C C	C C	C C	C C	C C
8	8_58539173	0	58539173	A G	G G	G G	G G	G G	G G	A G	A G	G G	A G	A G	G G	G G	A G	A G	A A	A G	G G	G G	G G	A G	G G	G G	A A	G G	G G	G G	A G	G G	G G	G G	G G
8	8_58543381	0	58543381	C C	C C	C C	C C	C C	C C	T C	T C	C C	T C	T C	C C	C C	T C	C C	T C	T C	C C	C C	C C	T C	C C	C C	T T	C C	C C	C C	C C	C C	C C	C C	C C
8	8_58587862	0	58587862	A A	A A	G G	G G	A A	G A	G A	G A	A A	G A	G G	G G	G A	G G	G A	G A	G G	G G	A A	G A	G A	G G	A A	G G	G G	G A	G A	G A	G A	A A	G A	A A
8	8_58635226	0	58635226	C C	C C	T C	C C	C C	C C	C C	C C	C C	C C	C C	C C	T C	C C	C C	C C	C C	C C	C C	C C	C C	C C	C C	C C	T C	C C	C C	C C	T C	C C	C C	C C
8	8_58687458	0	58687458	G G	G G	G G	G G	G G	G G	G G	G G	G G	G G	G G	G G	G G	G G	G G	G G	G G	A G	G G	G G	G G	G G	G G	G G	G G	G G	A G	G G	G G	G G	G G	G G
8	8_58769017	0	58769017	T C	C C	C C	C C	T C	C C	C C	T C	C C	C C	C C	C C	C C	C C	T C	T C	C C	T C	C C	C C	T C	T C	C C	C C	C C	C C	T T	T C	C C	C C	C C	C C
8	8_58769135	0	58769135	T C	C C	C C	C C	T C	C C	C C	T C	C C	C C	C C	C C	C C	C C	T C	T C	C C	T C	C C	C C	T C	T C	C C	C C	C C	C C	T T	T C	C C	C C	C C	C C
8	8_58839117	0	58839117	A G	G G	A G	G G	G G	G G	G G	G G	G G	G G	G G	G G	A G	G G	A G	A G	G G	A G	G G	G G	G G	A G	G G	G G	A G	G G	A G	A G	A G	G G	G G	G G
8	8_58839223	0	58839223	C A	A A	C A	A A	A A	A A	A A	A A	A A	A A	A A	A A	C A	A A	C A	C A	A A	C A	A A	A A	A A	C A	A A	A A	C A	A A	C A	C A	C A	A A	A A	A A
8	8_58852792	0	58852792	T T	C C	T C	T C	T C	C C	C C	T C	C C	C C	C C	T C	T C	C C	T C	T C	C C	T C	C C	C C	T C	T C	C C	C C	T C	C C	T T	T C	T C	C C	C C	C C
8	8_58852866	0	58852866	C C	C C	T C	C C	T C	C C	C C	T C	C C	C C	C C	C C	T C	C C	T C	T C	C C	C C	C C	C C	T C	C C	C C	C C	T C	C C	T C	T C	T C	C C	C C	C C
8	8_58878935	0	58878935	C T	T T	C T	C T	C T	T T	C T	C C	T T	C T	C T	C T	C T	C T	C T	C T	C T	C T	T T	T T	C C	C T	T T	C C	C T	T T	C C	T T	C T	T T	T T	T T
8	8_58889760	0	58889760	T C	C C	C C	T C	T C	C C	T C	T T	T C	T C	T C	T C	C C	T C	T C	T C	T C	T C	T C	C C	T T	C C	T C	T T	C C	T C	T T	C C	T C	C C	C C	T C
8	8_58892689	0	58892689	A G	G G	G G	A G	A G	G G	A G	A A	A G	A G	A G	A G	G G	A G	A G	A G	A G	A G	A G	G G	A A	G G	A G	A A	G G	A G	A A	G G	A G	G G	G G	A G
8	8_58992328	0	58992328	C C	C C	C C	T C	T C	C C	C C	T C	T C	C C	C C	T C	C C	C C	C C	C C	C C	T C	T C	C C	T C	C C	T C	C C	C C	T C	T T	C C	T C	C C	C C	T C
8	8_59050079	0	59050079	G G	A A	G A	A A	A A	A A	G A	G A	A A	G A	G A	A A	G A	G A	A A	G A	G A	A A	A A	A A	G A	A A	A A	G G	G A	A A	A A	A A	G A	A A	A A	A A
8	8_59085465	0	59085465	G G	A A	G A	A A	A A	A A	G A	G A	A A	G A	G A	A A	G A	G A	G A	G A	G A	A A	A A	A A	G A	A A	A A	G G	G A	A A	A A	A A	G A	A A	A A	A A
8	8_59164786	0	59164786	C T	T T	T T	C T	T T	T T	T T	T T	T T	T T	T T	T T	T T	C T	C C	C T	T T	T T	T T	T T	T T	T T	T T	T T	T T	T T	T T	C T	T T	T T	T T	T T
8	8_59193971	0	59193971	C C	C C	T C	T T	T C	C C	T C	T T	T C	T C	T C	T C	T C	T T	T C	T C	T C	C C	T C	C C	T T	T C	T C	T T	T C	T C	T C	C C	T T	C C	C C	T C
8	8_59219578	0	59219578	C C	C C	C C	T C	C C	C C	C C	T C	T C	C C	C C	T C	C C	C C	C C	C C	C C	C C	T C	C C	C C	C C	T C	C C	C C	T C	C C	C C	T C	C C	C C	T C
8	8_59219685	0	59219685	G G	G G	G G	A G	G G	G G	G G	A G	A G	G G	G G	A G	G G	G G	G G	G G	G G	G G	A G	G G	G G	G G	A G	G G	G G	A G	G G	G G	A G	G G	G G	A G
8	8_59250520	0	59250520	A G	A A	A G	G G	A G	A A	A G	G G	A G	A G	A G	A G	A G	G G	G G	G G	A G	A A	A G	A A	G G	A G	A G	G G	A G	A G	A G	A G	G G	A A	A A	A G
8	8_59310011	0	59310011	T T	T T	T T	C T	T T	T T	C T	C T	T T	C T	C T	C T	T T	C T	T T	C T	C T	T T	T T	T T	C T	C T	T T	C C	T T	T T	T T	T T	T T	T T	T T	T T
8	8_59339766	0	59339766	A A	A A	G A	G A	A A	G A	G A	G G	A A	G A	G G	G G	A A	G A	G A	G G	G G	G A	A A	G A	G A	G A	A A	G G	G G	G A	A A	G G	G A	A A	G A	A A
8	8_59377880	0	59377880	G G	G G	A G	A G	G G	A G	A G	A A	G G	A G	A A	A A	G G	A G	A G	A A	A A	A G	G G	A G	A G	A G	G G	A A	A A	A G	G G	A A	A G	G G	A G	G G
8	8_59389885	0	59389885	G G	G G	A G	A G	G G	A G	A G	A A	G G	A G	A A	A A	G G	A G	A A	A A	A A	A G	G G	A G	A G	A G	G G	A A	A A	A G	G G	A A	A G	G G	A G	G G
8	8_59427259	0	59427259	C C	T T	T T	T T	C T	T T	T T	T T	T T	T T	T T	T T	T T	T T	T T	T T	T T	C T	T T	T T	C T	T T	T T	T T	T T	T T	C C	T T	T T	T T	T T	T T
8	8_59436941	0	59436941	T T	T T	T T	T T	T T	T T	T T	T T	C T	T T	T T	T T	T T	T T	T T	T T	T T	T T	T T	T T	T T	T T	C T	T T	T T	C T	T T	T T	C T	T T	T T	C T
8	8_59437103	0	59437103	T T	T T	T T	T T	T T	T T	T T	T T	C T	T T	T T	T T	T T	T T	T T	T T	T T	T T	T T	T T	T T	T T	C T	T T	T T	C T	T T	T T	C T	T T	T T	C T
8	8_59497634	0	59497634	A A	C C	C C	A C	A C	C C	C C	C C	C C	C C	C C	A C	C C	C C	C C	C C	C C	A C	C C	C C	A C	C C	C C	C C	C C	C C	A A	C C	C C	C C	C C	C C
8	8_59505150	0	59505150	T T	T T	C T	C T	T T	C T	C T	C C	T T	C T	C C	C T	T T	C C	C T	C C	C C	C T	C T	C T	C T	C T	T T	C C	C C	C T	T T	C C	C T	T T	C T	T T
8	8_59523245	0	59523245	A A	A A	C A	C A	A A	C A	C A	C C	A A	C A	C C	C A	A A	C C	C A	C C	C C	C A	A A	C A	C A	C A	A A	C C	C C	C A	A A	C C	C A	A A	C A	A A
8	8_59523546	0	59523546	A A	G G	G G	A G	A G	G G	G G	G G	G G	G G	G G	A G	G G	G G	G G	G G	G G	A G	G G	G G	A G	G G	G G	G G	G G	G G	A A	G G	G G	G G	G G	G G
8	8_59630953	0	59630953	T C	C C	C C	C C	T C	C C	C C	C C	C C	C C	C C	C C	C C	C C	C C	C C	C C	T C	C C	C C	T C	C C	C C	C C	C C	C C	T T	C C	C C	C C	C C	C C
8	8_59659314	0	59659314	A A	A A	A A	C A	A A	A A	C A	C A	C A	C A	C A	A A	A A	C C	C C	C C	C A	C A	C A	A A	C A	C A	C A	C C	A A	C A	C A	C A	C A	A A	A A	C A
8	8_59722319	0	59722319	A G	G G	G G	G G	A G	G G	A G	A G	G G	A G	A G	G G	G G	A G	A G	A A	A G	G G	G G	G G	A A	G G	G G	A A	G G	G G	A G	A G	G G	G G	G G	G G
8	8_59722834	0	59722834	A A	A A	G A	G A	A A	A A	A A	A A	A A	A A	A A	A A	A A	G A	G A	A A	A A	G A	A A	A A	A A	G A	A A	A A	A A	A A	G A	A A	A A	A A	A A	A A
8	8_59845467	0	59845467	A A	A A	A A	A A	A A	A A	A A	C A	A A	A A	A A	A A	A A	A A	A A	A A	A A	A A	A A	A A	A A	A A	A A	A A	A A	A A	A A	A A	A A	A A	A A	A A
8	8_59845585	0	59845585	G G	G G	G G	G G	G G	G G	G G	A G	G G	G G	G G	G G	G G	G G	G G	G G	G G	G G	G G	G G	G G	G G	G G	G G	G G	G G	G G	G G	G G	G G	G G	G G
8	8_59845736	0	59845736	C C	C C	C C	C C	C C	C C	C C	A C	C C	C C	C C	C C	C C	C C	C C	C C	C C	C C	C C	C C	C C	C C	C C	C C	C C	C C	C C	C C	C C	C C	C C	C C
8	8_59845897	0	59845897	G G	G G	G G	G G	G G	G G	G G	A G	G G	G G	G G	G G	G G	G G	G G	G G	G G	G G	G G	G G	G G	G G	G G	G G	G G	G G	G G	G G	G G	G G	G G	G G
8	8_59913391	0	59913391	A G	G G	A G	A G	G G	A G	G G	G G	G G	G G	A G	A A	G G	G G	G G	G G	A G	A G	G G	A G	G G	A G	G G	G G	A A	A G	G G	A G	A G	G G	A G	G G
8	8_59921798	0	59921798	T C	C C	T C	T C	C C	T C	C C	C C	C C	C C	T C	T T	C C	C C	C C	C C	T C	T C	C C	T C	C C	T C	C C	C C	T T	T C	C C	T C	T C	C C	T C	C C
8	8_59941596	0	59941596	C C	C C	C C	C C	C C	C C	C C	T C	C C	C C	C C	C C	C C	C C	T C	T C	C C	T C	C C	C C	C C	C C	C C	C C	C C	C C	T C	T C	C C	C C	C C	C C
8	8_59957100	0	59957100	G G	G G	G G	G G	G G	G G	G G	A G	G G	G G	G G	G G	G G	G G	G G	G G	G G	G G	G G	G G	G G	A G	G G	G G	G G	G G	G G	G G	G G	G G	G G	G G
8	8_59978457	0	59978457	G A	A A	G A	G A	A A	A A	G A	G G	A A	G A	G A	G A	A A	G A	A A	G A	G G	G A	A A	A A	G A	A A	A A	G G	G A	G A	G A	A A	A A	A A	A A	A A
8	8_60004788	0	60004788	A A	C C	C A	A A	C A	C A	C A	C A	C A	C A	C A	C A	C C	A A	C A	A A	A A	A A	C C	C A	A A	C A	C A	A A	A A	A A	A A	A A	A A	C C	C A	C A
8	8_60005496	0	60005496	A A	G G	G A	A A	G A	G A	G A	G A	G A	G A	G A	G A	G G	A A	G A	A A	A A	A A	G G	G A	A A	G A	G A	A A	A A	A A	A A	A A	A A	G G	G A	G A
8	8_60038853	0	60038853	T C	C C	T C	T C	C C	C C	T C	T C	C C	T C	T C	T C	C C	T C	C C	T C	T T	T C	C C	C C	T C	C C	C C	T T	T C	T C	T C	C C	C C	C C	C C	C C
8	8_60064433	0	60064433	T T	G G	G T	T T	G T	G T	G T	T T	G T	G T	G T	G T	G G	T T	T T	T T	T T	T T	G G	G T	T T	G T	G T	T T	T T	T T	T T	T T	T T	G G	G T	G T
8	8_60172325	0	60172325	A G	G G	G G	A G	A G	A A	G G	A G	A G	G G	G G	G G	G G	A G	A A	A G	G G	A G	G G	A G	A G	A G	A G	G G	A G	A G	A G	A A	A A	G G	A G	A A
8	8_60175900	0	60175900	G A	A A	G A	G A	A A	A A	G A	G A	A A	G A	G A	G A	A A	G A	A A	G A	G G	G A	A A	A A	G A	A A	A A	G G	G A	G A	G A	A A	A A	A A	A A	A A
8	8_60224738	0	60224738	G A	A A	G A	G A	A A	A A	G A	G A	A A	G A	G A	G A	A A	G A	A A	G A	G G	G A	A A	A A	G A	A A	A A	G G	G A	G A	G A	A A	A A	A A	A A	A A
8	8_60243821	0	60243821	C C	A A	A C	C C	A C	C C	A C	C C	A C	A C	A C	A C	A A	C C	C C	C C	C C	C C	A A	A C	C C	A C	A C	C C	C C	C C	C C	C C	C C	A A	A C	C C
8	8_60261032	0	60261032	G G	T T	T G	G G	T G	G G	T G	G G	T G	T G	T G	T G	0 0	G G	G G	G G	G G	G G	T T	T G	G G	T G	T G	G G	G G	G G	G G	G G	G G	T T	T G	G G
8	8_60264086	0	60264086	A A	G G	G A	A A	G A	A A	G A	A A	G A	G A	G A	G A	G G	A A	A A	A A	A A	A A	G G	G A	A A	G A	G A	A A	A A	A A	A A	A A	A A	G G	G A	A A
8	8_60296802	0	60296802	A A	G G	G A	A A	G A	A A	G A	A A	G A	G A	A A	A A	G G	A A	A A	A A	A A	A A	G G	G A	A A	G A	G A	A A	A A	A A	A A	A A	A A	G A	G A	A A
8	8_60330762	0	60330762	C A	A A	A A	C A	C A	C C	A A	C A	C A	A A	C A	C A	A A	C A	C C	C A	A A	C A	A A	C A	C A	C A	C A	A A	C A	C A	C A	C C	C C	C A	C A	C C
8	8_60381801	0	60381801	T C	C C	C C	T C	C C	T T	C C	C C	C C	C C	T C	T C	C C	T C	T T	T C	C C	T C	C C	T C	C C	T C	C C	C C	T C	C C	T C	T C	T C	T C	T C	T C
8	8_60444774	0	60444774	C C	C C	T T	C C	T C	T C	C C	C C	T C	C C	T C	T C	C C	C C	T T	T C	T C	T T	C C	T C	T C	T C	T C	C C	T T	T T	T T	T T	T T	T C	C C	T T
8	8_60445187	0	60445187	G G	G G	A A	G G	A G	A G	G G	G G	A G	G G	A G	A G	G G	G G	A A	A G	A G	A A	G G	A G	A G	A G	A G	G G	A A	A A	A A	A A	A A	A G	G G	A A
8	8_60448507	0	60448507	A C	A A	C C	A C	A C	C C	A A	A A	A C	A A	A C	A C	A A	A C	C C	A C	A C	C C	A A	A C	A C	A C	A C	A A	C C	C C	C C	C C	C C	A C	A C	C C
8	8_60478881	0	60478881	C C	C C	T C	C C	T C	T C	C C	C C	C C	C C	C C	C C	C C	C C	T T	T C	C C	C C	C C	T C	T C	T C	C C	C C	T C	C C	T C	T C	T C	C C	C C	T C
8	8_60590170	0	60590170	A A	A A	A A	A A	A A	A A	A A	A A	A A	A A	A A	A A	A A	A A	A A	A A	A A	G A	A A	A A	A A	A A	A A	A A	A A	A A	G A	A A	A A	A A	A A	A A
8	8_60645488	0	60645488	C C	C C	T C	T C	C C	T C	C C	C C	C C	C C	C C	C C	0 0	T C	C C	C C	T C	T C	C C	C C	C C	C C	C C	C C	T C	T C	C C	T C	C C	C C	T C	C C
8	8_60663063	0	60663063	T T	T T	C T	C T	T T	C T	T T	T T	T T	T T	T T	T T	T T	C T	T T	T T	C T	C T	T T	T T	T T	T T	T T	T T	C T	C T	T T	C T	T T	T T	C T	T T
8	8_60664182	0	60664182	C T	T T	C T	C T	T T	C T	T T	T T	C T	T T	T T	T T	T T	C T	T T	T T	C T	C C	T T	T T	T T	T T	C T	T T	C T	C C	C T	C T	C T	T T	C T	C T
8	8_60713395	0	60713395	C C	C C	C C	C C	C C	C C	C C	C C	C C	C C	T C	T C	C C	C C	C C	C C	C C	C C	C C	C C	C C	C C	C C	C C	C C	C C	C C	C C	C C	T C	C C	C C
8	8_60838648	0	60838648	C C	C C	T C	C C	C C	T C	C C	T C	C C	C C	C C	C C	C C	C C	T T	T C	C C	C C	C C	C C	C C	T C	C C	C C	T C	C C	C C	T C	T C	C C	C C	T C
8	8_60839852	0	60839852	A A	A A	G A	A A	A A	G A	A A	G A	A A	A A	A A	A A	A A	A A	G G	G A	A A	A A	A A	A A	A A	G A	A A	A A	G A	A A	A A	G A	G A	A A	A A	G A
8	8_60840084	0	60840084	C C	C C	T C	C C	C C	T C	C C	T C	C C	C C	C C	C C	C C	C C	T T	T C	C C	C C	C C	C C	C C	T C	C C	C C	T C	C C	C C	T C	T C	C C	C C	T C
8	8_60892363	0	60892363	T T	T T	T T	T T	C T	T T	T T	T T	T T	T T	T T	T T	T T	T T	T T	T T	T T	T T	T T	C T	C T	T T	T T	T T	T T	T T	C T	T T	T T	T T	T T	T T
8	8_60902403	0	60902403	C C	C C	C C	C C	C C	C C	A C	A C	C C	A C	0 0	C C	C C	A C	C C	A C	A C	C C	C C	C C	A C	C C	C C	A A	C C	C C	C C	C C	C C	C C	C C	C C
8	8_60908416	0	60908416	C C	C C	C C	C C	C C	C C	C C	C C	C C	C C	C C	C C	C C	C C	C C	C C	C C	A C	C C	C C	C C	C C	C C	C C	C C	C C	C C	C C	C C	C C	C C	C C
8	8_60922952	0	60922952	G G	G G	G G	G G	G G	G G	A G	A G	G G	A G	A G	G G	G G	A G	G G	A G	A G	G G	G G	G G	A G	G G	G G	A A	G G	G G	G G	G G	G G	G G	G G	G G
8	8_60923024	0	60923024	T T	T T	C T	C T	T T	C T	T T	C T	T T	T T	T T	C T	T T	T T	C C	C T	T T	T T	C T	C T	T T	C T	T T	T T	C T	T T	T T	C T	C T	T T	T T	C T
8	8_60926078	0	60926078	T T	T T	C T	C T	T T	C T	T T	C T	T T	T T	T T	C T	T T	T T	C C	C T	T T	T T	C T	C T	T T	C T	T T	T T	C T	T T	T T	C T	C T	T T	T T	C T
8	8_60926540	0	60926540	G G	G G	A G	A G	G G	A G	G G	A G	G G	G G	G G	A G	G G	G G	A A	A G	G G	G G	A G	G G	G G	A G	G G	G G	A G	G G	G G	A G	A G	G G	G G	A G
8	8_61003800	0	61003800	G A	A A	G A	G A	A A	G A	A A	A A	A A	A A	A A	G A	A A	A A	G G	G A	A A	G G	G A	G A	A A	G A	A A	A A	G A	A A	G A	G G	G A	A A	A A	G A
8	8_61003909	0	61003909	T T	T T	T T	T T	T T	T T	C T	C T	T T	C T	C T	T T	T T	C T	T T	C T	C T	T T	T T	T T	C T	T T	T T	C C	T T	T T	T T	T T	T T	T T	T T	T T
8	8_61105061	0	61105061	A G	G G	A G	G G	G G	G G	G G	G G	G G	G G	G G	G G	G G	G G	G G	G G	G G	G G	G G	G G	G G	G G	G G	G G	G G	G G	G G	G G	G G	G G	G G	G G
8	8_61139575	0	61139575	C C	C C	C C	C C	T C	C C	C C	T C	T C	C C	C C	C C	C C	C C	C C	C C	C C	C C	C C	C C	T C	C C	T C	C C	C C	T C	T C	C C	T C	C C	C C	T C
8	8_61205617	0	61205617	A A	A A	C A	A A	A A	A A	A A	A A	A A	A A	A A	A A	A A	A A	A A	A A	A A	A A	A A	A A	A A	A A	A A	A A	A A	A A	A A	A A	A A	A A	A A	A A
8	8_61236795	0	61236795	A G	G G	A G	A G	G G	A G	A G	A G	G G	A G	A G	A G	G G	A G	A A	A A	A G	G G	A G	G G	A G	A A	G G	A A	A G	G G	G G	A G	A G	G G	G G	A G
8	8_61237073	0	61237073	A G	G G	A G	A G	G G	A G	A G	A G	G G	A G	A G	A G	G G	A G	A A	A A	A G	G G	A G	G G	A G	A A	G G	A A	A G	G G	G G	A G	A G	G G	G G	A G
8	8_61240437	0	61240437	A G	G G	A G	A G	G G	A G	A G	A G	G G	A G	A G	A G	G G	A G	A A	A A	A G	G G	A G	G G	A A	A A	G G	A A	A G	G G	G G	A G	A G	G G	G G	A G
8	8_61251671	0	61251671	A A	G G	G A	G A	G A	G A	G A	A A	G A	G A	G A	G A	G G	G A	A A	A A	G A	G A	G A	G G	A A	A A	G A	A A	G A	G A	G A	G A	A A	G G	G G	A A
8	8_61269362	0	61269362	T T	0 0	C T	T T	T T	T T	T T	T T	T T	T T	T T	T T	T T	T T	T T	T T	T T	T T	T T	T T	T T	T T	T T	T T	T T	T T	T T	T T	T T	T T	T T	T T
8	8_61307149	0	61307149	C A	A A	C A	A A	A A	A A	A A	A A	A A	A A	C A	C A	A A	A A	A A	A A	A A	C A	A A	C A	A A	A A	A A	A A	A A	C A	C A	C A	A A	C A	A A	A A
8	8_61416014	0	61416014	A G	A A	G G	A G	A G	A G	A G	G G	A G	A G	A G	A G	A A	A G	G G	G G	A G	G G	A G	A G	G G	G G	A G	G G	A G	G G	G G	G G	G G	A A	A A	G G
8	8_61458617	0	61458617	T G	G G	T G	G G	T G	G G	G G	T G	T G	G G	G G	G G	G G	G G	G G	G G	G G	G G	G G	G G	T G	G G	T G	G G	G G	T G	T G	G G	T G	G G	G G	T G
8	8_61484534	0	61484534	C T	C C	T T	C T	C T	C T	C T	C T	C C	C T	T T	T T	C C	C T	T T	T T	C T	T T	C T	C T	T T	T T	C C	T T	C T	C T	T T	T T	C T	C T	C C	C T
8	8_61514929	0	61514929	A C	C C	A C	A C	C C	A C	A C	A C	C C	A C	A C	A C	C C	A C	A A	A A	A C	A C	A C	A C	A C	A A	C C	A A	A C	A C	A C	A A	A C	C C	C C	A C
8	8_61558651	0	61558651	A G	G G	A G	G G	A G	G G	G G	A G	A G	G G	A G	A G	G G	G G	G G	G G	G G	A G	G G	G G	A G	G G	A G	G G	G G	A G	A G	G G	A G	A G	G G	A G
8	8_61558721	0	61558721	T T	T T	T T	T T	T T	T T	T T	C T	C T	T T	T T	T T	T T	T T	T T	T T	T T	C T	T T	T T	T T	T T	C T	T T	T T	C T	T T	T T	C T	T T	T T	C T
8	8_61611177	0	61611177	A A	A A	A A	A A	A A	A A	A A	G A	G A	A A	A A	A A	A A	A A	A A	A A	A A	A A	A A	A A	A A	A A	G A	A A	A A	G A	A A	A A	G A	A A	A A	G A
8	8_61693447	0	61693447	A A	G G	A A	G A	G A	G A	G A	G A	G G	G A	G A	G A	G G	G A	A A	A A	G A	A A	G A	G A	A A	A A	G G	A A	G A	G A	A A	A A	G A	G G	G G	G A
8	8_61704513	0	61704513	G G	G G	T G	T G	G G	T G	T G	T G	G G	T G	T G	T G	G G	T G	T T	T T	T G	T G	T G	T G	T G	T T	G G	T T	T G	T G	T G	T T	T G	G G	G G	T G
8	8_61753992	0	61753992	C C	T T	C T	T T	C T	T T	T T	C T	C T	T T	T T	T T	T T	T T	T T	T T	T T	C T	T T	T T	C T	T T	C T	T T	T T	C T	C T	T T	C T	T T	T T	C T
8	8_61803683	0	61803683	G G	G G	G G	G G	G G	G G	G G	A G	A G	G G	G G	G G	G G	G G	G G	G G	G G	G G	G G	G G	G G	G G	A G	G G	G G	A G	G G	G G	A G	G G	G G	A G
8	8_61809708	0	61809708	A A	A A	A A	G A	A A	A A	G A	G A	A A	G A	G A	G A	A A	G A	A A	G A	G A	A A	G A	A A	G A	G A	A A	G G	A A	A A	A A	A A	A A	A A	A A	A A
8	8_61883414	0	61883414	G G	G G	A G	A G	G G	G G	A G	A G	G G	A G	A G	A G	G G	A G	G G	A G	A A	A G	A G	G G	A G	A G	G G	A A	A G	A G	A G	A G	G G	G G	G G	G G
8	8_61883617	0	61883617	A A	A A	A A	A A	A A	G A	A A	G A	G A	A A	A A	A A	A A	A A	A A	A A	A A	G A	A A	G A	A A	A A	G A	A A	A A	G A	A A	A A	G A	A A	A A	G G
8	8_61932194	0	61932194	G G	G G	G G	A G	G G	G G	A G	A G	G G	A G	A G	A G	G G	A G	G G	A G	A A	A G	A G	G G	A G	A G	G G	A A	A G	G G	A G	A G	G G	G G	G G	G G
8	8_61932517	0	61932517	A A	A A	A A	G A	A A	A A	G A	G A	A A	G A	G A	G A	A A	G A	A A	G A	G G	G A	G A	A A	G A	G A	A A	G G	G A	A A	G A	G A	A A	A A	A A	A A
8	8_62055557	0	62055557	T T	T T	G G	T T	T T	T T	T T	T T	T T	T T	T T	T T	T T	T T	G G	G T	T T	T T	T T	T T	T T	G T	T T	T T	G T	G T	T T	G T	G T	T T	T T	T T
8	8_62130705	0	62130705	A A	A A	G G	A G	A G	A A	A G	G G	A A	A G	G G	G G	A A	A G	G G	G G	G G	G G	A G	A G	G G	G G	A A	G G	G G	A G	G G	G G	A G	A G	A A	A A
8	8_62134644	0	62134644	G G	G G	A A	G A	G A	G G	G A	A A	G G	G A	A A	A A	G G	G A	A A	A A	A A	A A	G A	G A	A A	A A	G G	A A	A A	G A	A A	A A	G A	G A	G G	G G
8	8_62198240	0	62198240	G G	G G	G G	A G	G G	A G	A G	A G	G G	A G	A G	A G	G G	A G	G G	A G	A A	G G	A G	A G	A G	A G	G G	A A	A G	G G	G G	G G	G G	G G	G G	A G
8	8_62272456	0	62272456	A A	A A	A A	A A	A A	A A	A A	G A	G A	A A	A A	A A	A A	A A	A A	A A	A A	A A	A A	A A	G A	G A	G A	A A	A A	G A	A A	A A	G A	A A	A A	G A
8	8_62324403	0	62324403	T C	C C	T T	T C	T C	T C	C C	T C	C C	C C	T C	T T	C C	C C	T T	T C	T C	T T	T C	T C	T C	T C	C C	C C	T T	T C	T T	T T	T C	T C	C C	T C
8	8_62326970	0	62326970	C C	C C	C C	C C	A C	C C	C C	C C	C C	C C	C C	C C	C C	C C	C C	C C	C C	A C	C C	C C	A C	C C	C C	C C	C C	C C	A C	C C	C C	C C	C C	C C
8	8_62357789	0	62357789	A A	A A	A A	G A	A A	G A	A A	A A	A A	A A	A A	G A	A A	A A	A A	A A	G A	A A	G A	G A	A A	A A	A A	A A	G A	A A	A A	A A	A A	A A	A A	G A
8	8_62566792	0	62566792	A G	G G	G G	G G	G G	A G	G G	G G	G G	G G	G G	G G	G G	G G	G G	G G	G G	A A	G G	A G	G G	G G	G G	G G	G G	G G	A G	A G	G G	G G	G G	A G
8	8_62574264	0	62574264	T T	C C	C C	T C	C C	T C	C C	C C	C C	C C	C C	T C	C C	C C	C C	C C	C C	T T	C C	T C	C C	C C	C C	C C	C C	C C	T C	T C	C C	C C	C C	T C
8	8_62595991	0	62595991	C A	A A	A A	C A	A A	A A	A A	A A	A A	A A	A A	C A	A A	A A	A A	A A	A A	C C	A A	C A	A A	A A	A A	A A	A A	A A	C A	C A	A A	A A	A A	A A
8	8_62596377	0	62596377	G G	A A	A A	G A	G A	A A	A A	A A	A A	A A	A A	G A	A A	A A	G A	G A	A A	G G	G A	G A	G A	A A	A A	A A	A A	A A	G G	G G	A A	A A	A A	A A
8	8_62656066	0	62656066	C C	C C	T T	C C	C C	C C	T C	T T	T C	T C	T C	C C	C C	T C	T C	T C	T T	C C	C C	C C	T C	T T	T C	T T	T T	T T	C C	C C	T T	C C	C C	T C
8	8_62656569	0	62656569	A A	A A	C C	A A	A A	A A	C A	C C	C A	C A	C A	A A	A A	C A	C A	C A	C C	A A	A A	A A	C A	C C	C A	C C	C C	C C	A A	A A	C C	A A	A A	C A
8	8_62659908	0	62659908	T C	C C	C C	C C	C C	C C	C C	C C	C C	C C	C C	C C	C C	C C	C C	C C	C C	T T	C C	T C	C C	C C	C C	C C	C C	C C	T C	T C	C C	C C	C C	C C
8	8_62673535	0	62673535	C C	C C	T T	C C	C C	C C	T C	T T	T C	T C	T C	C C	C C	T C	T C	T C	T T	C C	C C	C C	T C	T T	T C	T T	T T	T T	C C	C C	T T	C C	C C	T C
8	8_62782839	0	62782839	T G	G G	T G	G G	G G	G G	T G	T G	G G	T G	T T	T G	G G	T G	T G	T G	T T	G G	T G	T G	G G	G G	G G	T T	T G	G G	G G	G G	G G	T G	G G	G G
8	8_62847644	0	62847644	C C	T T	C T	T T	C T	C T	T T	T T	C T	T T	T T	T T	T T	T T	T T	T T	T T	C T	C T	C T	C T	C T	C T	T T	C T	C C	C C	C T	C C	T T	T T	C C
8	8_62872760	0	62872760	T C	C C	T C	C C	C C	C C	T C	T T	C C	T C	T T	T C	C C	T C	T T	T T	T T	T C	T C	T C	T C	T C	C C	T T	T C	C C	T C	T T	C C	T C	C C	C C
8	8_62876222	0	62876222	G G	G G	T G	G G	G G	G G	G G	G G	T G	G G	G G	G G	G G	G G	G G	G G	G G	T G	G G	G G	G G	T G	T G	G G	T G	T T	G G	G G	T T	G G	G G	T G
8	8_62877979	0	62877979	C T	T T	C T	T T	T T	T T	C T	C C	T T	C T	C C	C T	T T	C T	C C	C C	C C	C T	C T	C T	C T	C T	T T	C C	C T	T T	C T	C C	T T	C T	T T	T T
8	8_62878190	0	62878190	A G	G G	A G	G G	G G	G G	A G	A A	G G	A G	A A	A G	G G	A G	A G	A G	A A	G G	G G	G G	A G	A G	G G	A A	A G	G G	G G	G G	G G	A G	G G	G G
8	8_62879625	0	62879625	G A	A A	G A	A A	A A	A A	G A	G G	A A	G A	G G	G A	A A	G A	G G	G G	G G	G A	G A	G A	G A	G A	A A	G G	G A	A A	G A	G G	A A	G A	A A	A A
8	8_62899998	0	62899998	T C	C C	T C	C C	C C	T C	T C	T T	C C	T C	T T	T C	C C	T C	T T	T T	T T	T C	T C	T C	T C	T C	C C	T T	T C	C C	T C	T T	C C	T C	C C	T C
8	8_62930919	0	62930919	T G	G G	T G	G G	G G	G G	T G	T T	G G	T G	T T	T G	G G	T G	T G	T G	T T	G G	G G	G G	T G	T G	G G	T T	T G	G G	G G	G G	G G	T G	G G	G G
8	8_62939074	0	62939074	0 0	G G	T G	G G	G G	G G	T G	T T	G G	T G	T T	T G	G G	T G	T G	T G	T T	G G	G G	G G	T G	T G	G G	T T	T G	G G	G G	G G	G G	T G	G G	G G
8	8_63004267	0	63004267	C T	T T	T T	T T	C T	T T	T T	T T	C T	T T	T T	T T	T T	T T	T T	T T	T T	T T	T T	T T	C T	T T	C T	T T	T T	C T	C T	T T	C T	T T	T T	C T
8	8_63098883	0	63098883	C C	T T	C C	T C	T C	T C	T C	C C	T C	T C	C C	C C	T T	T C	C C	C C	C C	C C	T C	T C	C C	C C	T C	C C	C C	C C	C C	C C	C C	T C	T T	C C
8	8_63106680	0	63106680	C C	C C	C C	C C	T C	C C	C C	C C	T C	C C	C C	C C	C C	C C	C C	C C	C C	C C	C C	C C	T C	C C	T C	C C	C C	T C	T C	C C	T C	C C	C C	T C
8	8_63166474	0	63166474	T C	C C	T C	C C	C C	C C	T C	T C	C C	T C	T C	C C	C C	T C	C C	T C	T C	C C	C C	T C	C C	C C	C C	T T	C C	C C	C C	C C	C C	C C	C C	C C
8	8_63199591	0	63199591	A A	A A	A A	A A	C A	A A	A A	A A	C A	A A	A A	A A	A A	A A	A A	A A	A A	A A	A A	A A	C A	A A	C A	A A	A A	C A	C A	A A	C A	A A	A A	C A
8	8_63224126	0	63224126	C C	A A	C A	A A	C A	C A	C A	C A	C A	C A	C A	A A	A A	C A	A A	C A	C A	C A	C A	C A	C A	C A	C A	C C	C A	C C	C C	C A	C C	A A	A A	C C
8	8_63224274	0	63224274	T T	C C	T C	C C	T C	T C	T C	T C	T C	T C	T C	C C	C C	T C	C C	T C	T C	T C	T C	T C	T C	T C	T C	T T	T C	T T	T T	T C	T T	C C	C C	T T
8	8_63255510	0	63255510	G G	G G	A G	G G	G G	G G	A G	A G	G G	A G	A G	G G	G G	A G	G G	A G	A A	G G	G G	G G	G G	A G	G G	A A	A A	A G	G G	G G	A G	G G	G G	G G
8	8_63256288	0	63256288	G G	G G	A G	G G	G G	G G	A G	A G	G G	A G	A G	G G	G G	A G	G G	A G	A A	G G	G G	G G	G G	A G	G G	A A	A A	A G	G G	G G	A G	G G	G G	G G
8	8_63344359	0	63344359	G G	A A	G A	A A	A A	G A	A A	G A	A A	A A	A A	A A	A A	A A	G G	G A	A A	G A	G A	A A	G A	G A	A A	A A	A A	A A	G A	G G	A A	A A	A A	G A
8	8_63373066	0	63373066	A A	C C	C A	C A	C A	C A	C A	A A	C A	C A	A A	A A	C C	C A	C A	A A	A A	C C	C C	C A	A A	A A	C A	A A	A A	A A	C A	C A	A A	C A	C C	A A
8	8_63437224	0	63437224	C C	C C	C C	T C	T C	C C	T C	T C	C C	T C	T T	T T	C C	T C	T C	T C	T C	C C	T C	T C	T T	T T	C C	T T	T C	T C	T C	C C	T C	T C	C C	C C
8	8_63487014	0	63487014	A A	G G	G A	G A	G A	G G	G A	G A	G A	G A	A A	A A	G G	G A	G A	G A	G A	A A	G A	G A	A A	A A	G A	A A	G A	A A	A A	G A	A A	G A	G G	G A
8	8_63537807	0	63537807	A A	A A	G A	A A	A A	G A	A A	G A	A A	A A	A A	A A	A A	A A	G A	G A	G A	A A	A A	A A	A A	A A	A A	A A	G A	A A	A A	G A	A A	A A	A A	G A
8	8_63559486	0	63559486	C C	C C	T C	C C	C C	T C	C C	T C	C C	C C	T C	T C	C C	C C	T C	T C	T C	C C	C C	C C	C C	C C	C C	C C	T C	C C	C C	T C	C C	T C	C C	T C
8	8_63607638	0	63607638	T G	G G	T G	G G	T G	G G	G G	G G	T G	G G	G G	G G	G G	G G	G G	G G	G G	G G	T G	G G	T G	G G	T G	G G	G G	T G	T G	G G	T G	G G	G G	T G
8	8_63622790	0	63622790	T T	C C	T T	C C	T C	T C	C C	T T	T C	C C	C C	C C	C C	C C	T T	T C	T C	T C	T C	C C	T T	T C	T C	C C	T C	T C	T C	T C	T C	C C	C C	T T
8	8_63674086	0	63674086	T T	T T	G T	T T	T T	G T	T T	G G	T T	T T	T T	T T	T T	T T	G T	G T	G T	T T	T T	T T	G T	G T	T T	T T	G T	T T	T T	G T	T T	T T	T T	G T
8	8_63678055	0	63678055	C C	C C	C C	C C	C C	C C	C C	C C	C C	C C	C C	C C	C C	C C	T C	C C	C C	C C	C C	C C	C C	C C	C C	C C	C C	C C	C C	C C	C C	C C	C C	C C
8	8_63678478	0	63678478	A A	A A	C A	A A	A A	C A	A A	C C	A A	A A	A A	A A	A A	A A	C A	C A	C A	A A	A A	A A	C A	C A	A A	A A	C A	A A	A A	C A	A A	A A	A A	C A
8	8_63714849	0	63714849	G G	G G	T G	T G	T G	G G	G G	G G	G G	G G	G G	T G	G G	G G	G G	G G	G G	T G	T G	G G	T G	T G	G G	G G	T G	T G	T T	T G	T G	G G	G G	G G
8	8_63730676	0	63730676	A A	A A	A A	A A	A A	A A	A A	A A	A A	A A	A A	A A	A A	A A	A A	A A	A A	A A	A A	A A	A A	A A	A A	A A	A A	A A	A A	A A	A A	A A	A A	A A
8	8_63730732	0	63730732	T T	T T	T T	T T	T T	T T	T T	T T	T T	T T	T T	T T	T T	T T	T T	T T	T T	T T	T T	T T	T T	T T	T T	T T	T T	T T	T T	T T	T T	T T	T T	T T
8	8_63839900	0	63839900	T T	G G	G T	G T	G T	G G	G T	G G	G T	G T	G T	G T	G G	G T	G G	G T	T T	T T	G T	G G	G T	G T	G T	T T	T T	T T	T T	G T	T T	G G	G G	G T
8	8_63862446	0	63862446	A G	G G	A G	A G	A G	G G	A G	G G	G G	A G	A G	A G	G G	A G	G G	A G	A A	A G	A G	G G	A G	A G	G G	A A	A A	A G	A A	A G	A G	G G	G G	G G
8	8_63912872	0	63912872	C C	C C	C C	C C	C C	C C	C C	C C	C C	C C	C C	C C	C C	C C	C C	C C	C C	C C	C C	C C	C C	C C	C C	C C	C C	C C	C C	C C	C C	C C	C C	C C
8	8_63996074	0	63996074	G T	0 0	G T	T T	T T	T T	T T	T T	T T	T T	T T	T T	T T	T T	G T	T T	T T	T T	T T	T T	T T	T T	T T	T T	T T	T T	T T	T T	T T	T T	T T	T T
8	8_64008441	0	64008441	G G	G G	G G	G G	G G	G G	G G	G G	G G	G G	G G	G G	G G	G G	G G	G G	G G	G G	G G	G G	G G	G G	G G	G G	G G	G G	G G	G G	G G	G G	G G	G G
8	8_64011573	0	64011573	A C	C C	A C	C C	C C	C C	C C	C C	C C	C C	C C	C C	C C	C C	A C	C C	C C	C C	C C	C C	C C	C C	C C	C C	C C	C C	C C	C C	C C	C C	C C	C C
8	8_64058483	0	64058483	T C	C C	T C	C C	C C	C C	C C	C C	C C	C C	C C	C C	C C	C C	T C	C C	C C	C C	C C	C C	C C	C C	C C	C C	C C	C C	C C	C C	C C	C C	C C	C C
8	8_64079323	0	64079323	C C	C C	T C	C C	C C	C C	T C	T C	T C	T C	T C	C C	C C	T C	C C	T C	T T	T C	C C	C C	C C	C C	T C	T T	T C	T T	C C	C C	T C	C C	C C	T C
8	8_64123841	0	64123841	A G	G G	G G	G G	G G	G G	G G	G G	G G	G G	G G	G G	G G	G G	A G	G G	G G	G G	G G	A G	G G	G G	G G	G G	G G	G G	G G	G G	G G	G G	G G	G G
8	8_64136029	0	64136029	C C	C C	T C	C C	C C	C C	T C	T C	T C	T C	T C	C C	C C	T C	C C	T C	T T	T C	C C	C C	C C	C C	T C	T T	T C	T T	C C	C C	T C	C C	C C	T C
8	8_64149058	0	64149058	A A	A A	G A	A A	A A	A A	G A	G A	G A	G A	G A	A A	A A	G A	A A	G A	G G	G A	A A	A A	A A	A A	G A	G G	G A	G G	A A	A A	G A	A A	A A	G A
8	8_64161856	0	64161856	G G	G G	G G	G G	G G	G G	G G	A G	G G	G G	G G	G G	G G	G G	G G	G G	G G	G G	G G	G G	A G	A G	G G	G G	G G	G G	G G	G G	G G	G G	G G	G G
8	8_64224519	0	64224519	C T	T T	T T	T T	C T	T T	T T	C T	T T	T T	T T	T T	T T	T T	C T	T T	T T	C T	C T	C T	C C	C T	T T	T T	T T	T T	C T	T T	T T	T T	T T	T T
8	8_64262065	0	64262065	T T	T T	C C	C T	T T	T T	C T	C T	C T	C T	C T	C T	T T	C T	T T	C T	C C	T T	T T	T T	T T	T T	C T	C C	C C	C C	T T	T T	C C	T T	T T	C T
8	8_64283576	0	64283576	G A	A A	G G	G A	A A	A A	G A	G A	G A	G A	G A	G A	A A	G A	G A	G A	G G	A A	A A	A A	A A	A A	G A	G G	G G	G G	A A	A A	G G	A A	A A	G A
8	8_64316647	0	64316647	T T	T T	T T	T T	T T	T T	T T	C T	T T	T T	T T	T T	T T	T T	T T	T T	T T	C T	T T	T T	C T	C T	T T	T T	T T	T T	T T	T T	T T	T T	T T	T T
8	8_64336431	0	64336431	A G	G G	A A	A G	G G	G G	A G	A G	A G	A G	A A	A A	G G	A G	A A	A A	A A	G G	G G	G G	G G	G G	A G	A A	A A	A A	G G	A G	A A	A G	G G	A G
8	8_64424956	0	64424956	A G	G G	A G	A G	G G	A G	G G	G G	A G	G G	G G	A G	G G	G G	A G	G G	G G	A A	G G	G G	G G	G G	A G	G G	G G	A G	A G	A G	A G	G G	G G	A A
8	8_64445288	0	64445288	T C	C C	T C	C C	T C	C C	T C	T C	C C	T C	T C	C C	C C	T C	C C	T C	T T	C C	T C	C C	T C	C C	C C	T T	T T	C C	T C	C C	T C	C C	C C	C C
8	8_64477747	0	64477747	A G	G G	A G	A G	A G	G G	A G	A G	G G	A G	A G	A G	G G	A G	G G	A G	A A	G G	A G	G G	A G	G G	G G	A A	A A	G G	A G	G G	A G	G G	G G	G G
8	8_64481410	0	64481410	A G	G G	A G	A G	A G	G G	A G	A G	G G	A G	A G	A G	G G	A G	G G	A G	A A	G G	A G	G G	A G	G G	G G	A A	A A	G G	A G	G G	A G	G G	G G	G G
8	8_64489534	0	64489534	G G	G G	G G	A G	G G	G G	G G	G G	G G	G G	G G	A G	G G	G G	G G	G G	G G	G G	G G	G G	G G	G G	G G	G G	A G	G G	G G	G G	A G	G G	G G	G G
8	8_64507823	0	64507823	G A	A A	G A	A A	G A	A A	A A	G A	A A	A A	A A	A A	A A	A A	A A	A A	G A	A A	G A	A A	G G	G A	A A	A A	G A	A A	G A	A A	A A	A A	A A	A A
8	8_64642860	0	64642860	G G	G G	G G	G G	G G	G G	G G	T G	T G	G G	T G	T G	G G	G G	T G	T G	G G	T T	G G	G G	T G	T G	T G	G G	G G	T T	T G	T T	T G	T G	G G	T G
8	8_64646038	0	64646038	A A	A A	A A	A A	A A	A A	A A	A A	C A	A A	C A	C A	A A	A A	C A	C A	A A	C C	A A	A A	A A	A A	C A	A A	A A	C C	C A	C C	C A	C A	A A	C A
8	8_64726334	0	64726334	G A	0 0	0 0	A A	A A	G A	G A	G A	A A	G A	G A	A A	A A	G A	A A	G A	G A	A A	A A	A A	A A	A A	A A	G G	A A	A A	A A	A A	A A	A A	A A	G A
8	8_64726617	0	64726617	T T	T T	C T	C T	C T	T T	T T	T T	T T	T T	T T	C T	T T	T T	T T	T T	C T	T T	C T	T T	C T	T T	T T	T T	C C	T T	C T	T T	C T	T T	T T	T T
8	8_64783489	0	64783489	G G	G G	A G	G G	G G	G G	G G	G G	G G	G G	G G	G G	G G	G G	G G	G G	A G	G G	G G	G G	G G	G G	G G	G G	A G	G G	G G	G G	G G	G G	G G	G G
8	8_64911341	0	64911341	C C	T T	T C	T T	C C	T C	T C	T C	T C	T C	C C	T C	T T	T C	C C	C C	C C	C C	T C	T C	T C	T T	T C	C C	T C	C C	C C	C C	T C	T C	T C	C C
8	8_64916811	0	64916811	G G	G G	G G	G G	G G	G G	G G	G G	G G	G G	G G	G G	G G	G G	G G	G G	A G	G G	G G	G G	G G	G G	G G	G G	A G	G G	G G	G G	G G	G G	G G	G G
8	8_64933924	0	64933924	A A	A A	A A	A A	A A	A A	G A	G A	G A	G A	G A	A A	A A	A A	A A	G A	G A	A A	A A	A A	A A	A A	G A	G G	A A	G A	A A	A A	G A	A A	A A	G A
8	8_64948614	0	64948614	T G	G G	T G	G G	T G	G G	T G	T G	T G	T G	T T	T G	G G	T G	T T	T T	T G	T T	T G	G G	T G	G G	T G	T T	G G	T T	T T	T T	T G	T G	G G	T G
8	8_64967736	0	64967736	A G	G G	G G	G G	A G	A G	G G	G G	G G	G G	G G	G G	G G	G G	G G	G G	A G	G G	G G	G G	G G	G G	G G	G G	A G	G G	G G	G G	G G	G G	A G	A G
8	8_64983568	0	64983568	G G	G G	G G	G G	G G	G G	A G	A G	A G	A G	A A	G G	G G	G G	0 0	A A	A G	G G	G G	G G	G G	G G	A G	A A	G G	A G	G G	G G	A G	G G	G G	A G
8	8_65018343	0	65018343	A G	G G	G G	G G	A A	G G	G G	A G	G G	G G	G G	G G	G G	A G	A G	A G	G G	A A	A G	A G	A A	A G	G G	G G	A G	A G	A A	A A	A G	G G	A G	G G
8	8_65210901	0	65210901	A A	A A	A A	A A	A A	A A	A A	G A	A A	A A	A A	A A	A A	A A	A A	A A	A A	A A	A A	G A	G A	G A	A A	A A	A A	A A	A A	A A	A A	A A	A A	A A
8	8_65245829	0	65245829	C C	T T	T T	T T	T T	T T	T T	T T	T T	T T	C T	C T	T T	T T	C C	T T	C T	T T	T T	T T	T T	T T	T T	T T	C T	C T	T T	C T	T T	C T	T T	T T
8	8_65318773	0	65318773	G G	G G	G G	T G	T G	T G	G G	G G	G G	G G	G G	G G	G G	G G	G G	G G	G G	T T	G G	G G	G G	G G	G G	G G	T G	G G	T G	T G	T G	G G	T G	T G
8	8_65338188	0	65338188	A A	A A	A A	G A	A A	G A	A A	A A	A A	A A	A A	A A	A A	A A	A A	A A	A A	G G	A A	A A	A A	A A	A A	A A	G A	A A	G A	G A	G A	A A	A A	G A
8	8_65338482	0	65338482	T T	T T	T T	C T	T T	C T	T T	T T	T T	T T	T T	T T	T T	T T	T T	T T	T T	C C	T T	T T	T T	T T	T T	T T	C T	T T	C T	C T	C T	T T	T T	C T
8	8_65346525	0	65346525	T T	T T	T T	T T	T T	T T	T T	T T	T T	T T	T T	T T	T T	T T	T T	T T	T T	T T	T T	T T	T T	T T	T T	T T	T T	T T	T T	T T	T T	T T	T T	T T
8	8_65348845	0	65348845	A G	G G	A G	G G	G G	G G	A G	A G	A G	A G	A G	G G	G G	G G	A G	A G	A G	G G	G G	G G	G G	G G	A G	A A	G G	A G	G G	G G	A G	G G	G G	A G
8	8_65410733	0	65410733	G G	G G	G G	G G	G G	G G	G G	G G	G G	G G	G G	G G	G G	G G	G G	G G	G G	G G	G G	G G	G G	G G	G G	G G	G G	G G	G G	G G	G G	G G	G G	G G
8	8_65439662	0	65439662	A C	C C	C C	A C	C C	C C	C C	C C	C C	C C	C C	C C	C C	C C	A C	C C	C C	A A	C C	A C	C C	C C	C C	C C	A C	C C	A C	A C	A C	C C	C C	C C
8	8_65448116	0	65448116	C C	T T	T T	T T	C T	C T	C T	C T	T T	C T	C T	T T	T T	T T	C T	C T	C C	T T	T T	T T	T T	T T	T T	C C	C T	T T	T T	T T	T T	T T	C T	C T
8	8_65486432	0	65486432	A A	A A	A A	G A	A A	A A	A A	A A	A A	A A	A A	A A	A A	A A	A A	A A	A A	A A	A A	A A	A A	A A	A A	A A	G A	G A	A A	A A	G A	A A	A A	A A
8	8_65495040	0	65495040	A A	A A	A A	C A	A A	A A	A A	A A	A A	A A	A A	A A	A A	A A	A A	A A	A A	C A	A A	A A	A A	A A	A A	A A	C A	A A	A A	A A	C A	A A	A A	A A
8	8_65565331	0	65565331	T T	G G	G G	G T	T T	G T	G T	T T	G G	G T	T T	G T	G G	G G	T T	G T	T T	T T	G T	G T	T T	G T	G G	T T	T T	G T	T T	T T	G T	G T	G T	G T
8	8_65600419	0	65600419	G G	G G	G G	G G	T G	G G	G G	G G	G G	G G	G G	G G	G G	G G	G G	G G	G G	T G	G G	T G	T G	G G	G G	G G	G G	G G	T T	T G	G G	G G	G G	G G
8	8_65629566	0	65629566	T T	T T	C T	T T	T T	T T	T T	T T	C T	T T	T T	T T	T T	T T	T T	T T	T T	T T	T T	T T	T T	T T	C T	T T	T T	C T	T T	T T	C T	T T	T T	C T
8	8_65660166	0	65660166	T C	C C	C C	C C	C C	T C	T C	T C	C C	T C	T C	C C	C C	C C	C C	T C	T T	C C	C C	C C	C C	C C	C C	T T	T C	T C	C C	C C	C C	C C	C C	T C
8	8_65760533	0	65760533	T T	T T	T T	T T	T T	T T	T T	T T	T T	T T	T T	T T	T T	T T	T T	T T	C T	T T	T T	T T	T T	T T	T T	T T	C T	T T	T T	T T	T T	T T	T T	T T
8	8_65773772	0	65773772	T T	C T	C T	C T	T T	C T	C T	T T	T T	C T	T T	T T	C C	C T	T T	T T	T T	T T	C C	C T	T T	C T	T T	T T	T T	T T	T T	T T	T T	C T	C T	T T
8	8_65778137	0	65778137	A A	G A	G A	G A	A A	G A	G A	A A	A A	G A	A A	A A	G G	G A	A A	A A	A A	A A	G G	G A	A A	G A	A A	A A	A A	A A	A A	A A	A A	G A	G A	A A
8	8_65865538	0	65865538	T T	T T	T T	T T	T T	T T	T T	C T	T T	T T	T T	T T	T T	T T	T T	T T	T T	T T	T T	T T	C T	C T	T T	T T	T T	T T	T T	T T	T T	T T	T T	T T
8	8_65869398	0	65869398	T C	T C	C C	C C	C C	C C	C C	T C	T C	C C	C C	T C	C C	T C	C C	T C	C C	T C	C C	T C	T C	T C	T C	C C	C C	C C	C C	C C	C C	C C	C C	C C
8	8_65921158	0	65921158	T C	C C	C C	C C	C C	C C	C C	C C	C C	C C	C C	C C	C C	C C	C C	C C	T C	T C	C C	T C	C C	C C	T C	C C	T C	C C	C C	C C	C C	C C	C C	C C
8	8_65941821	0	65941821	C C	T C	T C	T T	C C	T C	T C	C C	C C	T C	T C	T C	T T	T C	T T	C C	C C	C C	T T	T T	C C	T C	T C	C C	T C	C C	C C	T C	T C	T T	T C	C C
8	8_65942104	0	65942104	A A	G A	G A	G G	A A	G A	G A	A A	A A	G A	G A	G A	G G	G A	G G	A A	A A	A A	G G	G G	A A	G A	G A	A A	G A	A A	A A	G A	G A	G G	G A	A A
8	8_65957571	0	65957571	A A	A A	A A	A A	A A	A A	A A	A A	A A	A A	A A	A A	A A	A A	A A	A A	G A	A A	A A	A A	A A	A A	A A	A A	G A	A A	A A	A A	A A	A A	A A	A A
8	8_65957671	0	65957671	C C	C C	C C	C C	C C	C C	C C	T C	C C	C C	C C	C C	C C	C C	C C	C C	C C	C C	C C	C C	T C	T C	C C	C C	C C	C C	C C	C C	C C	C C	C C	C C
8	8_65968377	0	65968377	C C	T C	T C	T T	C C	T C	T C	C C	C C	T C	T C	T C	T T	T C	T T	C C	C C	C C	T T	T C	C C	T C	C C	C C	T C	C C	C C	T C	T C	T T	T C	C C
8	8_66019552	0	66019552	A G	G G	G G	G G	G G	G G	G G	A G	G G	G G	G G	G G	G G	G G	G G	G G	G G	A G	G G	A G	A G	A G	A G	G G	G G	G G	A G	A G	G G	G G	G G	G G
8	8_66041783	0	66041783	G T	T T	G T	T T	G T	T T	T T	G T	G T	T T	T T	T T	T T	T T	T T	T T	T T	G T	T T	G T	G G	G T	G G	T T	T T	G T	G G	G T	G T	T T	T T	G T
8	8_66048047	0	66048047	A A	A A	A A	A A	A A	A A	A A	A A	A A	A A	A A	A A	A A	A A	A A	A A	A A	A A	G A	A A	A A	A A	A A	A A	A A	A A	A A	A A	A A	A A	A A	A A
8	8_66076516	0	66076516	T T	T T	G T	T T	G T	T T	T T	G T	G T	T T	T T	T T	T T	T T	T T	T T	T T	G T	T T	G T	G G	G T	G G	T T	T T	G T	G G	G T	G T	T T	T T	G T
8	8_66103181	0	66103181	A A	A A	A A	A A	A A	A A	A A	A A	A A	A A	A A	A A	A A	A A	A A	A A	A A	A A	G A	A A	A A	A A	A A	A A	A A	A A	A A	A A	A A	A A	A A	A A
8	8_66178543	0	66178543	C C	C T	C T	C T	T T	C C	C T	C T	T T	C T	T T	T T	C C	C T	T T	T T	C T	C C	C C	C T	C T	C C	T T	T T	C T	C T	C T	C T	T T	C T	C T	C T
8	8_66195066	0	66195066	G A	A A	A A	G A	A A	G A	A A	A A	A A	A A	G A	G A	A A	A A	G G	A A	A A	G G	A A	A A	A A	A A	A A	A A	G A	G A	G A	G G	G A	G A	A A	G A
8	8_66240645	0	66240645	C C	T T	T T	T T	T T	T T	T T	T T	T T	T T	T T	T T	T T	T T	T T	T T	T T	T T	C T	T T	T T	T T	T T	T T	T T	T T	T T	T T	T T	T T	T T	T T
8	8_66244791	0	66244791	A A	G G	G G	G G	G G	G G	G G	G G	G G	G G	G G	G G	G G	G G	G G	G G	G G	G G	A G	G G	G G	G G	G G	G G	G G	G G	G G	G G	G G	G G	G G	G G
8	8_66244833	0	66244833	T T	C C	C C	C C	C C	C C	C C	C C	C C	C C	C C	C C	C C	C C	C C	C C	C C	C C	T C	C C	C C	C C	C C	C C	C C	C C	C C	C C	C C	C C	C C	C C
8	8_66245634	0	66245634	A A	G G	G G	G G	G G	G G	G G	G G	G G	G G	G G	G G	G G	G G	G G	G G	G G	G G	A G	G G	G G	G G	G G	G G	G G	G G	G G	G G	G G	G G	G G	G G
8	8_66254921	0	66254921	T T	C C	C C	C C	C C	C C	C C	C C	C C	C C	C C	C C	C C	C C	C C	C C	C C	C C	T C	C C	C C	C C	C C	C C	C C	C C	C C	C C	C C	C C	C C	C C
8	8_66272412	0	66272412	T T	C C	C C	C C	C C	C C	C C	C C	C C	C C	C C	C C	C C	C C	C C	C C	C C	C C	T C	C C	C C	C C	C C	C C	C C	C C	C C	C C	C C	C C	C C	C C
8	8_66292420	0	66292420	C C	C C	T C	C C	T C	C C	C C	C C	T C	C C	C C	C C	C C	C C	C C	C C	C C	T C	C C	C C	T C	C C	T C	C C	C C	T C	T T	T C	T C	C C	C C	T C
8	8_66298462	0	66298462	A A	A A	A A	A A	A A	A A	A A	G A	A A	A A	A A	A A	A A	A A	A A	A A	G A	A A	A A	G A	G A	G A	G A	A A	G A	A A	A A	A A	A A	A A	A A	A A
8	8_66331963	0	66331963	C T	C T	T T	C T	C T	T T	T T	T T	C T	T T	T T	C T	T T	C T	T T	C T	T T	C T	T T	T T	C T	T T	T T	T T	C T	C T	C C	C T	C T	T T	T T	T T
8	8_66352831	0	66352831	A A	G G	A G	A G	A A	A G	G G	A G	G G	G G	A G	A G	G G	G G	A A	G G	A G	A G	G G	A G	A A	A G	A G	G G	A A	A G	A A	A A	A G	A G	A G	A G
8	8_66402668	0	66402668	A G	G G	G G	A G	A G	G G	G G	G G	G G	G G	G G	G G	G G	G G	G G	G G	A G	G G	A G	G G	G G	G G	G G	G G	A G	G G	G G	G G	G G	G G	A G	G G
8	8_66415274	0	66415274	T T	T T	T T	C T	C T	T T	T T	T T	T T	T T	T T	T T	T T	T T	T T	T T	C T	T T	T T	T T	T T	T T	T T	T T	C T	T T	T T	T T	T T	T T	C T	T T
8	8_66485621	0	66485621	T G	G G	T G	G G	G G	G G	G G	T G	G G	G G	G G	G G	G G	G G	G G	G G	G G	G G	G G	G G	T G	T G	G G	G G	G G	G G	G G	G G	G G	G G	G G	G G
8	8_66518747	0	66518747	T T	C T	C T	T T	C T	T T	T T	T T	C T	T T	T T	C T	T T	C T	T T	C T	T T	C T	T T	T T	C T	T T	T T	T T	T T	C T	C C	C T	T T	T T	T T	T T
8	8_66522395	0	66522395	G G	T G	T G	G G	T G	T G	G G	G G	T G	G G	G G	T G	G G	T G	G G	T G	G G	T G	G G	G G	T G	G G	G G	G G	G G	T G	T T	T G	G G	G G	G G	T G
8	8_66541735	0	66541735	A A	A A	A A	A A	A A	A A	G A	G A	A A	G A	G A	A A	A A	A A	A A	G A	G A	A A	G A	A A	A A	A A	A A	G G	A A	A A	A A	A A	A A	A A	A A	A A
8	8_66575802	0	66575802	A A	A A	A A	A A	A A	A A	A A	A A	A A	A A	G A	G A	A A	A A	G G	A A	G A	A A	A A	A A	A A	A A	A A	A A	G A	A A	A A	G A	A A	G A	A A	A A
8	8_66645998	0	66645998	A A	A A	A A	A A	A A	A A	A A	A A	A A	A A	C A	C A	A A	A A	C C	A A	C A	A A	A A	A A	A A	A A	A A	A A	C A	A A	A A	C A	A A	C A	A A	A A
8	8_66695074	0	66695074	A A	A A	A A	A A	A A	A A	C A	C C	A A	C A	C A	A A	A A	A A	A A	C A	C A	A A	C A	C A	C A	C A	C A	C C	A A	A A	A A	A A	A A	A A	A A	A A
8	8_66728267	0	66728267	A A	A G	A G	A G	G G	A A	A G	G G	A G	A G	G G	G G	A A	A G	G G	G G	A G	G G	A G	A G	G G	A G	A G	G G	A A	A G	G G	G G	A A	A G	A G	A A
8	8_66764000	0	66764000	C C	C C	C C	C C	T C	C C	C C	C C	C C	C C	T C	T C	C C	C C	T T	C C	C C	C C	C C	C C	T C	C C	C C	C C	T C	T C	T C	T C	T C	T C	C C	C C
8	8_66784434	0	66784434	A A	A A	A A	A A	G A	G A	G A	G A	A A	G A	G G	G A	A A	A A	G G	G A	G G	A A	G A	G A	A A	A A	G A	G G	G A	A A	A A	G A	A A	G A	G A	G A
8	8_66811037	0	66811037	G G	G G	G G	G G	G G	G G	A G	A A	G G	A G	A G	G G	G G	G G	G G	A G	A A	A A	A G	A G	A G	A G	A G	A A	A G	G G	A G	A G	G G	G G	G G	G G
8	8_66898152	0	66898152	C C	A C	A C	A C	C C	A C	A C	A C	A C	A C	C C	C C	A A	A C	C C	C C	C C	C C	A C	A C	A C	A A	A C	C C	C C	A C	C C	C C	A C	A C	A C	A C
8	8_66898423	0	66898423	G G	A G	A G	A G	G G	A G	A G	A G	A G	A G	G G	G G	A A	A G	G G	G G	G G	G G	A G	A G	A G	A A	A G	G G	A G	A G	G G	G G	A A	A G	A G	A G
8	8_66930892	0	66930892	C C	C C	A C	C C	C C	C C	A C	A C	C C	A C	A C	C C	C C	C C	C C	A C	A A	C C	A C	A C	C C	C C	A C	A A	A C	C C	C C	C C	C C	C C	C C	C C
8	8_66961083	0	66961083	T T	T T	C T	T T	T T	T T	C T	C T	T T	C T	C C	C T	T T	T T	C C	C T	C C	T T	C T	C T	T T	T T	C T	C C	C T	C T	T T	C T	T T	C T	T T	T T
8	8_67056570	0	67056570	G G	A A	A A	A A	G G	G A	A A	A A	A A	A A	A A	A A	A A	A A	A A	A A	A A	A A	A A	A A	G A	A A	A A	A A	G A	A A	G A	A A	G A	A A	G A	G A
8	8_67083066	0	67083066	C C	C C	T C	C C	C C	C C	T C	T C	C C	T C	T C	C C	C C	C C	C C	T C	T T	T C	T C	T C	C C	C C	T C	T T	T C	T C	C C	C C	C C	C C	C C	C C
8	8_67096189	0	67096189	G G	G G	A G	G G	G G	G G	G G	G G	G G	G G	G G	G G	G G	G G	G G	G G	G G	G G	G G	G G	G G	G G	G G	G G	G G	A G	G G	G G	G G	G G	G G	G G
8	8_67113836	0	67113836	T C	T C	T C	T C	C C	C C	T C	T T	T C	T C	T T	T T	C C	T C	T T	T T	T T	T T	T C	T C	T C	T C	T C	T T	T C	T C	T C	T T	C C	T C	C C	C C
8	8_67121042	0	67121042	C T	T T	T T	T T	C C	C T	T T	T T	T T	T T	T T	T T	T T	T T	T T	T T	T T	T T	T T	T T	C T	T T	T T	T T	C T	T T	C T	T T	C T	T T	C T	C T
8	8_67135013	0	67135013	A G	A A	A G	A G	A A	A G	G G	G G	A G	G G	A G	A A	G G	A G	A A	A G	G G	G G	G G	G G	A G	G G	G G	G G	A G	A G	A G	A G	A G	A G	A G	A G
8	8_67138837	0	67138837	T G	T T	G G	T G	T T	T G	G G	G G	T G	G G	G G	T G	G G	T G	G G	T G	G G	G G	G G	G G	T G	G G	G G	G G	T G	G G	T G	G G	T G	G G	T G	T G
8	8_67139022	0	67139022	A G	A A	G G	A G	A A	A G	G G	G G	A G	G G	G G	A G	G G	A G	G G	A G	G G	G G	G G	G G	A G	G G	G G	G G	A G	G G	A G	G G	A G	G G	A G	A G
8	8_67190823	0	67190823	G A	A A	A A	A A	A A	A A	A A	A A	A A	A A	A A	A A	A A	A A	A A	A A	A A	A A	A A	A A	A A	A A	A A	A A	A A	A A	A A	A A	A A	A A	A A	A A
8	8_67241037	0	67241037	G A	G G	A A	G A	G A	G A	A A	A A	G A	A A	A A	G A	A A	G A	A A	G A	A A	A A	A A	A A	A A	A A	A A	A A	G A	A A	A A	A A	G A	A A	G A	G A
8	8_67258879	0	67258879	G G	G G	G G	G G	A G	G G	G G	G G	G G	G G	G G	G G	G G	G G	G G	G G	G G	G G	G G	G G	A G	G G	G G	G G	G G	A G	A G	G G	G G	G G	G G	G G
8	8_67308575	0	67308575	T T	T T	T C	T C	T C	T C	C C	T C	T C	C C	T C	T T	C C	T C	T T	T C	C C	T C	C C	C C	T C	T C	C C	C C	T C	C C	T C	T T	T C	T C	T C	T C
8	8_67353875	0	67353875	T T	T T	T T	T T	C T	T T	T T	T T	T T	T T	C T	C T	T T	T T	C C	T T	T T	T T	T T	T T	C T	T T	T T	T T	T T	C T	C T	C T	T T	C T	T T	T T
8	8_67386693	0	67386693	T C	C C	C C	C C	C C	C C	C C	C C	C C	C C	C C	C C	C C	C C	C C	C C	C C	C C	T C	C C	C C	C C	C C	C C	C C	C C	C C	C C	C C	C C	C C	C C
8	8_67405479	0	67405479	G G	G G	G G	G G	T G	G G	G G	G G	T G	G G	T G	T G	G G	G G	T T	G G	G G	G G	G G	G G	T G	G G	G G	G G	G G	G G	T G	T G	G G	T G	G G	G G
8	8_67438493	0	67438493	G G	A A	G A	A A	A A	A A	A A	A A	A A	A A	A A	A A	A A	A A	A A	A A	A A	G A	A A	A A	A A	A A	A A	A A	A A	A A	A A	A A	A A	A A	A A	A A
8	8_67479892	0	67479892	G A	A A	A A	A A	A A	A A	A A	A A	A A	A A	A A	A A	A A	A A	A A	A A	A A	A A	A A	A A	A A	A A	A A	A A	A A	A A	A A	A A	A A	A A	A A	A A
8	8_67516482	0	67516482	C A	C A	C A	C C	C A	C A	C A	C A	C A	C A	A A	C A	C C	C C	A A	C A	A A	C A	C A	C A	C A	C C	C A	A A	C A	C A	A A	A A	C C	C A	C C	C A
8	8_67546811	0	67546811	A G	G G	G G	G G	G G	G G	A G	A A	G G	A G	A G	G G	G G	G G	G G	A G	A A	G G	G G	G G	A G	G G	G G	A A	A G	A G	G G	G G	G G	G G	G G	G G
8	8_67625379	0	67625379	G G	A A	G G	A G	A G	A G	G G	G G	G G	G G	G G	A G	G G	A G	G G	A G	G G	G G	G G	G G	G G	G G	G G	G G	A G	G G	G G	G G	A G	G G	A G	A G
8	8_67633775	0	67633775	G G	T T	G G	T G	T G	T G	G G	G G	G G	G G	G G	T G	0 0	T G	G G	T G	G G	G G	G G	G G	G G	G G	G G	G G	T G	G G	G G	G G	T G	G G	T G	T G
8	8_67640813	0	67640813	T C	C C	C C	C C	C C	C C	C C	C C	C C	C C	C C	C C	C C	C C	C C	C C	C C	T C	C C	C C	C C	C C	C C	C C	C C	C C	T C	T C	C C	C C	C C	C C
8	8_67675813	0	67675813	T C	T T	C C	T C	C C	C C	C C	C C	T C	C C	T C	T T	C C	T C	T T	T C	C C	C C	C C	T C	C C	C C	C C	C C	T C	C C	C C	T C	T C	T C	C C	C C
8	8_67747745	0	67747745	G G	G G	A G	G G	A A	A G	A G	A G	G G	A G	A G	G G	G G	G G	G G	A G	A A	A A	G G	A G	A G	G G	G G	A A	A G	G G	A A	A G	G G	G G	A G	A G
8	8_67862731	0	67862731	G T	G G	T T	G T	T T	T T	T T	T T	G T	T T	G T	G G	T T	G T	G G	G T	T T	T T	T T	T T	T T	T T	T T	T T	G T	T T	T T	G T	G T	G T	T T	T T
8	8_67865832	0	67865832	G A	G G	A A	G A	A A	A A	A A	A A	G A	A A	G A	G G	A A	G A	G G	G A	A A	A A	A A	A A	A A	A A	A A	A A	G A	A A	A A	G A	G A	G A	A A	A A
8	8_67872615	0	67872615	C C	C C	C C	C C	C C	C C	C C	C C	C C	C C	C C	C C	C C	C C	C C	C C	C C	C C	C C	T C	C C	C C	T C	C C	C C	C C	C C	C C	C C	C C	C C	C C
8	8_67960676	0	67960676	T T	T T	T T	T T	T T	T T	T T	T T	T T	T T	T T	T T	T T	T T	T T	T T	T T	T T	T T	C T	T T	T T	C T	T T	T T	T T	T T	T T	T T	T T	T T	T T
8	8_68036904	0	68036904	G T	T T	G T	G T	G T	G T	G T	T T	G T	G T	T T	T T	G G	G T	T T	T T	T T	T T	G T	T T	T T	G G	G T	T T	T T	G T	T T	T T	G T	G T	G G	G T
8	8_68069075	0	68069075	A A	G A	A A	G A	A A	A A	A A	A A	A A	A A	A A	G A	A A	A A	A A	A A	A A	A A	A A	G A	A A	A A	A A	A A	A A	A A	A A	A A	A A	A A	A A	A A
8	8_68127182	0	68127182	T C	T C	C C	T C	T C	C C	C C	C C	C C	C C	C C	T C	C C	C C	C C	C C	C C	T C	C C	T T	C C	C C	T C	C C	T C	C C	T C	T C	T C	C C	T C	C C
8	8_68129076	0	68129076	G T	G T	T T	T T	T T	T T	T T	G T	T T	T T	T T	T T	T T	G T	T T	G T	T T	G T	T T	T T	G T	T T	T T	T T	T T	G T	T T	T T	T T	T T	T T	T T
8	8_68208708	0	68208708	A G	A G	G G	G G	G G	G G	G G	A G	G G	G G	G G	G G	G G	G G	G G	G G	G G	A G	G G	G G	A G	G G	G G	G G	G G	G G	A G	A G	G G	G G	G G	G G
8	8_68209182	0	68209182	T C	T C	C C	C C	C C	C C	C C	T C	C C	C C	C C	C C	C C	C C	C C	C C	C C	T C	C C	C C	T C	C C	C C	C C	C C	C C	T C	T C	C C	C C	C C	C C
8	8_68239857	0	68239857	G A	G A	A A	G A	G G	A A	A A	A A	A A	A A	A A	G A	A A	G A	A A	G A	A A	A A	A A	G G	G A	A A	G A	A A	A A	G A	G A	A A	A A	A A	G A	A A
8	8_68251595	0	68251595	A C	A C	C C	A C	A A	C C	C C	C C	C C	C C	C C	A C	C C	A C	C C	A C	C C	C C	C C	A A	A C	C C	A C	C C	C C	A C	A C	C C	C C	C C	A C	C C
8	8_68261639	0	68261639	G A	G A	A A	G A	G A	A A	A A	A A	A A	A A	A A	G A	A A	G A	A A	G A	A A	A A	A A	G G	A A	A A	G A	A A	A A	G A	A A	A A	A A	A A	G A	A A
8	8_68275685	0	68275685	A A	A A	A A	A A	G A	A A	A A	A A	A A	A A	A A	A A	A A	A A	A A	A A	A A	A A	G A	A A	G A	A A	A A	A A	G A	A A	G A	A A	G A	A A	A A	A A
8	8_68308766	0	68308766	A A	A A	A A	A A	C A	A A	A A	A A	A A	A A	A A	A A	A A	A A	A A	A A	A A	A A	A A	A A	C A	A A	A A	A A	C A	A A	C A	A A	C A	A A	A A	A A
8	8_68402042	0	68402042	A A	C C	C C	C C	C C	C C	C C	C C	A C	C C	A C	A C	C C	A C	A A	A C	C C	A C	C C	C C	C C	A C	C C	C C	C C	A C	C C	A C	C C	A C	C C	C C
8	8_68451759	0	68451759	C C	T C	C C	C C	C C	C C	C C	C C	T C	C C	T C	T C	C C	C C	T T	C C	C C	C C	C C	C C	C C	C C	C C	C C	T C	C C	C C	T C	T C	T C	C C	C C
8	8_68483265	0	68483265	T T	T T	C C	T C	T C	C C	T C	T C	T C	T C	T T	T T	C C	T C	T T	T C	T T	T C	C C	T C	T C	T C	T C	T T	T T	T C	T T	T T	T C	T C	T C	C C
8	8_68483632	0	68483632	G G	G G	A A	G A	G A	A A	G A	G A	G A	G A	G G	G G	A A	G A	G G	G A	G G	G A	A A	G A	G A	G A	G A	G G	G G	G A	G G	G G	G A	G A	G A	A A
8	8_68498709	0	68498709	A A	C C	C C	C C	A C	C C	A C	A C	A C	A C	A A	A C	C C	A C	A A	A C	A A	A C	C C	A C	A C	A C	A C	A A	A C	A C	A A	A A	C C	A C	C C	C C
8	8_68525762	0	68525762	T T	C C	C C	C C	T C	C C	T C	T C	T C	T C	T T	T C	C C	T C	T T	T C	T T	T C	C C	T C	T C	T C	T C	T T	T C	T C	T T	T T	C C	T C	C C	C C
8	8_68562859	0	68562859	T T	T C	C C	C C	T C	C C	T C	T C	T C	T C	T T	T C	C C	T C	T T	T C	T T	T C	C C	T C	T C	T C	T C	T T	T T	T C	T T	T T	T C	T C	C C	C C
8	8_68586910	0	68586910	G G	G G	G G	G G	A G	A G	A G	A G	G G	A G	A G	G G	G G	G G	G G	A G	A A	A G	G G	G G	A G	G G	G G	A A	A G	G G	A A	A G	G G	G G	G G	A G
8	8_68587069	0	68587069	T T	T T	T T	T T	G T	T T	G T	G T	T T	G T	G T	T T	T T	T T	T T	T T	G G	G T	T T	T T	G T	T T	T T	G G	G T	T T	G G	G T	T T	T T	T T	T T
8	8_68601166	0	68601166	G G	G G	A G	G G	G G	G G	G G	A G	G G	G G	G G	G G	0 0	G G	G G	G G	G G	A G	A G	A G	A G	G G	G G	G G	G G	G G	G G	G G	G G	G G	G G	G G
8	8_68616681	0	68616681	C C	C T	T T	C T	C T	C T	C T	C T	C T	C T	C C	C C	T T	C T	C C	C C	C C	C T	T T	C T	C T	C T	C T	C C	C T	C T	C C	C C	T T	C T	C T	C T
8	8_68718413	0	68718413	C C	C C	C C	C C	A C	C C	C C	C C	C C	C C	C C	C C	C C	C C	C C	C C	C C	C C	C C	C C	A C	C C	C C	C C	C C	C C	A C	C C	C C	C C	C C	C C
8	8_68767438	0	68767438	A A	G A	G A	A A	A A	G A	G A	G G	A A	G A	G A	A A	A A	A A	A A	G A	G G	G G	G A	G G	G A	A A	G A	G G	G G	A A	G A	G A	G G	A A	A A	G A
8	8_68803796	0	68803796	G A	G A	A A	G A	A A	G A	G A	G A	A A	G A	G A	G A	A A	A A	A A	G A	G G	G A	A A	G A	A A	A A	A A	G G	G A	A A	A A	A A	A A	A A	G A	G A
8	8_68834100	0	68834100	A A	A A	A A	A A	A A	G A	G A	G A	G A	G A	G G	G A	A A	A A	G G	G A	G G	G A	A A	G A	A A	A A	A A	G G	G A	A A	A A	G A	A A	G A	A A	G A
8	8_69012997	0	69012997	A G	G G	G G	G G	G G	G G	G G	G G	G G	G G	G G	G G	G G	A G	G G	A G	G G	G G	G G	G G	G G	A G	G G	G G	G G	A G	G G	G G	G G	G G	G G	G G
8	8_69018701	0	69018701	G G	G G	G G	G G	A G	G G	G G	G G	G G	G G	G G	G G	G G	G G	G G	G G	G G	G G	G G	G G	A G	G G	G G	G G	G G	G G	A G	G G	A G	G G	G G	G G
8	8_69020670	0	69020670	G G	G G	G G	G G	G T	G T	G T	T T	G T	G T	T T	G T	G G	G G	T T	G T	T T	G T	G T	T T	T T	G G	G T	T T	G T	G G	G T	G T	G T	G T	G G	G T
8	8_69095175	0	69095175	G G	A G	G G	G G	G G	G G	G G	G G	G G	G G	G G	G G	G G	G G	G G	G G	G G	G G	G G	G G	G G	G G	G G	G G	G G	G G	G G	G G	G G	G G	G G	G G
8	8_69117228	0	69117228	A A	A A	A A	A A	A A	A A	A A	A A	A A	A A	A A	A A	A A	A A	A A	A A	A A	A A	A A	A A	A A	A A	A A	A A	G A	A A	A A	A A	G A	A A	A A	A A
8	8_69117655	0	69117655	C C	C C	T C	T C	T T	T C	T C	C C	T C	T C	C C	C C	T T	T C	C C	C C	C C	C C	T C	C C	T C	T C	T C	C C	C C	T C	T C	C C	T C	T C	T C	T C
8	8_69162264	0	69162264	A G	G G	G G	G G	G G	G G	A G	A G	G G	A G	A G	G G	G G	A G	G G	A G	A A	A G	G G	A G	G G	A G	G G	A A	A G	A G	G G	G G	G G	G G	G G	G G
8	8_69210040	0	69210040	G A	G A	G A	A A	A A	A A	G A	G A	G A	G A	G G	G A	A A	A A	G G	A A	G G	G A	G A	G A	A A	A A	A A	G G	G A	A A	G A	G G	A A	G A	A A	A A
8	8_69231259	0	69231259	G A	A A	G A	G A	G G	G A	G A	A A	G A	G A	A A	A A	G G	G G	A A	G A	A A	A A	G A	A A	G A	G G	G A	A A	A A	G G	G A	A A	G A	G A	G A	G A
8	8_69240459	0	69240459	G A	G A	G A	A A	A A	A A	G A	G A	G A	G A	G G	G A	A A	A A	G G	A A	G G	G A	G A	G A	A A	A A	A A	G G	G A	A A	G A	G G	A A	G A	A A	A A
8	8_69242635	0	69242635	A G	A G	A G	G G	G G	G G	A G	A G	A G	A G	A A	A G	G G	G G	A A	G G	A A	A G	A G	A G	G G	G G	G G	A A	A G	G G	A G	A A	G G	A G	G G	G G
8	8_69321417	0	69321417	A G	G G	G G	G G	G G	G G	G G	G G	G G	G G	G G	G G	G G	G G	G G	G G	G G	G G	G G	G G	G G	G G	G G	G G	A G	G G	G G	G G	A G	G G	G G	G G
8	8_69330624	0	69330624	C C	C C	T C	T C	T T	T C	T C	C C	T C	T C	C C	C C	T T	T C	C C	C C	C C	C C	T C	C C	T C	T C	T C	C C	C C	T C	T C	C C	C C	T C	T C	T C
8	8_69406653	0	69406653	T T	T T	T T	T T	T T	T T	T T	T T	T T	T T	T T	T T	T T	T T	T T	T T	T T	T T	T T	T T	T T	T T	T T	T T	T T	T T	T T	T T	T T	T T	T T	T T
8	8_69481258	0	69481258	C T	T T	T T	T T	C T	C T	T T	C T	T T	T T	T T	T T	T T	C T	T T	C C	T T	T T	T T	T T	C C	C T	T T	T T	T T	C T	C T	T T	T T	T T	T T	C T
8	8_69481371	0	69481371	C T	T T	T T	T T	C T	C T	T T	C T	T T	T T	T T	T T	T T	C T	T T	C C	T T	T T	T T	T T	C C	C T	T T	T T	T T	C T	C T	T T	T T	T T	T T	C T
8	8_69506193	0	69506193	T T	T T	T T	T T	C T	T T	C T	C C	T T	C T	C T	T T	T T	T T	T T	T T	C C	T T	T T	T T	C C	T T	T T	C C	C T	T T	C T	T T	T T	T T	T T	T T
8	8_69524910	0	69524910	A A	A G	A G	A G	G G	A G	A G	A G	G G	A G	A G	A G	G G	A G	G G	A A	A A	A G	A G	A A	G G	A G	A G	A A	A G	A G	G G	G G	G G	G G	G G	A G
8	8_69525181	0	69525181	C C	T T	C T	T T	T T	C T	T T	T T	T T	T T	T T	T T	T T	C T	T T	C C	T T	C T	C T	C C	T T	C T	C T	T T	T T	C T	T T	T T	T T	T T	T T	C T
8	8_69600113	0	69600113	C C	C C	C C	C C	C C	C C	C C	C C	C C	C C	C C	C C	C C	C C	C C	C C	C C	C C	C C	T C	C C	C C	C C	C C	C C	C C	C C	C C	C C	C C	C C	C C
8	8_69622252	0	69622252	A G	G G	G G	G G	G G	G G	G G	A G	A G	G G	A G	A G	G G	A G	A A	A A	G G	A G	A G	A A	G G	A G	A G	G G	G G	A G	G G	A G	G G	A G	A G	A G
8	8_69664934	0	69664934	G A	G A	A A	A A	A A	A A	A A	G A	G A	A A	G A	G A	A A	G A	G G	G G	A A	G G	A A	G G	A A	G A	G A	A A	G A	G A	G A	G G	G A	G A	G A	G A
8	8_69757840	0	69757840	A A	A A	C A	A A	A A	A A	A A	A A	A A	A A	A A	A A	A A	A A	A A	A A	A A	C A	A A	C A	A A	A A	A A	A A	A A	A A	A A	A A	A A	A A	A A	A A
8	8_69758694	0	69758694	C C	C C	T C	C C	C C	C C	C C	C C	0 0	C C	C C	C C	C C	C C	C C	C C	C C	T C	C C	T C	C C	C C	C C	C C	C C	C C	C C	C C	C C	C C	C C	C C
8	8_69844188	0	69844188	T C	C C	C C	C C	C C	C C	C C	C C	C C	C C	C C	C C	C C	C C	C C	C C	C C	T C	C C	C C	T C	C C	C C	C C	C C	C C	C C	C C	C C	C C	C C	C C
8	8_69858516	0	69858516	A A	A A	A A	A A	G A	A A	G A	G A	G A	G A	G G	G A	A A	A A	G G	A A	G G	A A	G A	G A	G G	A A	A A	G G	G A	A A	G A	G A	A A	G A	G A	A A
8	8_70001283	0	70001283	T C	T C	C C	C C	C C	C C	C C	C C	C C	C C	C C	C C	C C	C C	C C	C C	C C	C C	T C	T C	T C	C C	C C	C C	C C	C C	C C	C C	C C	C C	C C	C C
8	8_70001428	0	70001428	G A	G A	A A	A A	A A	A A	A A	A A	A A	A A	A A	A A	A A	A A	A A	A A	A A	A A	G A	G A	G A	A A	A A	A A	A A	A A	A A	A A	A A	A A	A A	A A
8	8_70084320	0	70084320	G A	G A	A A	A A	G A	A A	G A	G A	A A	G A	G A	A A	A A	A A	A A	A A	G G	A A	A A	A A	G A	A A	A A	G G	G G	A A	G A	A A	G A	A A	G A	A A
8	8_70084443	0	70084443	A G	A G	G G	G G	A G	G G	A G	A G	G G	A G	A G	G G	G G	G G	G G	G G	A A	G G	G G	G G	A G	G G	G G	A A	A A	G G	A G	G G	A G	G G	A G	G G
8	8_70084534	0	70084534	A G	A G	G G	G G	A G	G G	A G	A G	G G	A G	A G	G G	G G	G G	G G	G G	A A	G G	G G	G G	A G	G G	G G	A A	A A	G G	A G	G G	A G	G G	A G	G G
8	8_70084537	0	70084537	T C	T C	C C	C C	T C	C C	T C	T C	C C	T C	T C	C C	C C	C C	C C	C C	T T	C C	C C	C C	T C	C C	C C	T T	T T	C C	T C	C C	T C	C C	T C	C C
8	8_70084684	0	70084684	C T	C T	T T	T T	C T	T T	C T	C T	T T	C T	C T	T T	T T	T T	T T	T T	C C	T T	T T	T T	C T	T T	T T	C C	C C	T T	C T	T T	C T	T T	C T	T T
8	8_70123921	0	70123921	G T	G T	G T	T T	G T	T T	T T	T T	T T	T T	T T	T T	T T	T T	T T	G T	T T	T T	G T	G T	G G	T T	T T	T T	T T	T T	G T	T T	G T	T T	G T	G T
8	8_70132295	0	70132295	T T	T T	C T	T T	C T	T T	T T	T T	T T	T T	T T	T T	T T	T T	T T	C T	T T	T T	C T	C T	C C	T T	T T	T T	T T	T T	C T	T T	C T	T T	T T	C T
8	8_70193378	0	70193378	G G	G G	G G	G G	G G	G G	G G	G G	G G	G G	G G	G G	G G	G G	G G	G G	G G	G G	G G	T G	T G	G G	G G	G G	G G	G G	G G	G G	T G	G G	T G	G G
8	8_70526092	0	70526092	T C	C C	T C	C C	C C	C C	T C	T C	C C	T C	C C	C C	C C	T C	C C	T C	C C	C C	T C	C C	C C	T C	C C	C C	C C	T C	C C	C C	C C	C C	C C	C C
8	8_70642224	0	70642224	G G	G G	A G	G G	G G	G G	A G	G G	G G	A G	G G	G G	G G	G G	G G	A G	G G	G G	A G	A A	A G	G G	A G	G G	G G	G G	G G	G G	G G	G G	G G	A G
8	8_70668352	0	70668352	C T	C T	C T	C T	T T	T T	C T	C T	T T	C T	T T	C T	T T	C T	T T	C C	T T	T T	C T	C C	C T	C T	C T	T T	T T	C T	T T	T T	C T	T T	C T	C T
8	8_70688494	0	70688494	T T	C T	C T	C T	T T	T T	C T	T T	T T	C T	T T	C T	T T	T T	T T	C T	T T	T T	C T	C T	T T	T T	C T	T T	T T	T T	T T	T T	T T	T T	C T	C T
8	8_70738144	0	70738144	A G	G G	G G	G G	G G	G G	G G	A G	G G	G G	G G	G G	G G	A G	G G	A G	G G	G G	G G	G G	G G	A G	G G	G G	G G	A G	G G	G G	A G	G G	G G	G G
8	8_70761137	0	70761137	A A	A A	G A	A A	A A	A A	G A	A A	A A	G A	A A	A A	A A	A A	A A	A A	A A	A A	G A	G G	G A	A A	G A	A A	A A	A A	A A	A A	A A	A A	A A	A A
8	8_70836722	0	70836722	A G	A G	A G	G G	A G	G G	A G	A G	A G	A G	A A	A G	G G	G G	A G	G G	A A	A A	A G	A A	A A	G G	A G	A A	A G	G G	A A	A A	G G	A G	G G	G G
8	8_70840684	0	70840684	T T	T T	C T	T T	T T	T T	C T	T T	T T	C T	T T	T T	T T	T T	T T	T T	T T	T T	C T	C C	C T	T T	C T	T T	T T	T T	T T	T T	T T	T T	T T	T T
8	8_70876480	0	70876480	T T	T T	C T	T T	T T	T T	C T	T T	T T	C T	T T	T T	T T	T T	T T	T T	T T	T T	C T	C T	T T	T T	C T	T T	T T	T T	T T	T T	T T	T T	T T	T T
8	8_70954958	0	70954958	A G	A G	G G	G G	A G	G G	G G	A G	A G	G G	A A	A G	G G	G G	A G	G G	A A	A A	G G	A G	A G	G G	A G	A A	A G	G G	A A	A A	G G	A G	G G	G G
8	8_70958917	0	70958917	G A	G A	A A	A A	G A	A A	A A	G A	G A	A A	G G	G A	A A	A A	G A	G A	G G	G G	A A	G A	G A	A A	G A	G G	G A	A A	G G	G G	A A	G A	A A	G A
8	8_70959257	0	70959257	T C	T C	C C	C C	T C	C C	C C	T C	T C	C C	T T	T C	C C	C C	T C	T C	T T	T T	C C	T C	T C	C C	T C	T T	T C	C C	T T	T T	C C	T C	C C	T C
8	8_71138038	0	71138038	T C	C C	C C	C C	T C	C C	C C	T C	C C	C C	C C	C C	C C	T C	C C	T C	C C	C C	C C	T C	T C	T C	T C	C C	C C	T C	T C	C C	T C	C C	C C	C C
8	8_71224099	0	71224099	A G	G G	G G	G G	A G	G G	G G	A A	G G	G G	A G	G G	G G	A G	G G	A G	A G	A G	G G	A G	A G	A G	A G	A G	A G	A G	A G	G G	A G	G G	G G	G G
8	8_71232742	0	71232742	C T	T T	C T	T T	T T	T T	C T	C C	T T	C T	C T	T T	T T	C T	T T	C C	C T	C C	T T	T T	T T	C T	T T	C T	C T	C T	C T	C T	T T	T T	T T	C T
8	8_71260090	0	71260090	T T	T T	C T	T T	C T	T T	C T	T T	T T	C T	T T	T T	T T	T T	T T	C T	T T	C T	T T	C T	C T	T T	C C	T T	C T	T T	C C	C T	C C	T T	T T	C T
8	8_71260358	0	71260358	A A	A A	G A	A A	G A	A A	G A	A A	A A	G A	A A	A A	A A	A A	A A	G A	A A	G A	A A	G A	G A	A A	G G	A A	G A	A A	G G	G A	G G	A A	A A	G A
8	8_71329036	0	71329036	T T	T T	T T	T T	T T	T T	T T	T T	T T	T T	T T	T T	T T	T T	T T	T T	T T	G T	T T	G T	T T	T T	G T	T T	T T	T T	G T	G T	G T	T T	T T	T T
8	8_71383796	0	71383796	C C	C C	C C	C C	C C	C C	C C	C C	C C	C C	C C	C C	C C	C C	C C	C C	C C	T C	C C	T C	C C	C C	T C	C C	C C	C C	T C	T C	T C	C C	C C	C C
8	8_71490620	0	71490620	C C	C C	T C	T C	T C	T T	T C	C C	T C	T C	C C	C C	T T	T C	T C	C C	C C	T C	T C	T C	C C	T C	T C	C C	T C	T C	T C	T C	T T	T C	T C	T C
8	8_71504886	0	71504886	G A	G G	A A	G A	A A	A A	A A	G A	A A	A A	G A	G A	A A	A A	A A	A A	G A	G A	A A	G A	G A	A A	A A	G A	G A	A A	A A	A A	A A	A A	G A	A A
8	8_71552015	0	71552015	T T	T T	T T	T T	T T	T T	T T	T T	T T	T T	T T	T T	T T	T T	T T	T T	C T	T T	C T	T T	T T	T T	T T	C T	T T	T T	T T	T T	T T	T T	T T	T T
8	8_71570273	0	71570273	G A	G G	A A	G A	A A	A A	A A	G A	A A	A A	G A	G A	A A	A A	A A	G A	G A	G G	A A	G A	G A	A A	G A	G A	G A	A A	G A	G A	A A	A A	G A	G A
8	8_71663644	0	71663644	T C	T C	T C	T C	T C	C C	T C	T C	T C	T C	T C	T T	C C	T C	T C	T C	C C	T C	C C	T C	T C	T C	T C	C C	T C	T C	T T	T T	T T	T C	T C	C C
8	8_71666925	0	71666925	G G	G G	G G	G G	G G	G G	G G	G G	G G	G G	G G	G G	G G	G G	G G	G G	G G	G G	G G	A G	G G	G G	A G	G G	G G	G G	G G	G G	A G	G G	G G	G G
8	8_71700892	0	71700892	G G	G G	G G	G G	G G	G G	G G	G G	G G	G G	G G	G G	G G	G G	G G	G G	G G	G G	G G	A G	G G	G G	A G	G G	G G	G G	G G	G G	A G	G G	G G	G G
8	8_71704479	0	71704479	G A	G A	A A	A A	A A	A A	A A	A A	A A	A A	A A	A A	A A	A A	A A	A A	G A	A A	G A	G A	G A	A A	A A	G A	A A	A A	A A	A A	A A	A A	A A	A A
8	8_71751104	0	71751104	T C	C C	T C	C C	T C	C C	T C	T T	C C	T C	T C	C C	C C	T C	C C	T T	T T	T T	T C	T C	T C	T C	T T	T T	T C	C C	T T	T C	T C	C C	C C	T C
8	8_71751402	0	71751402	T C	T T	C C	T C	C C	C C	C C	C C	T C	C C	T C	T T	C C	C C	T C	C C	C C	C C	C C	T C	T C	C C	C C	C C	T C	T C	C C	T C	T C	T C	T C	C C
8	8_71796180	0	71796180	A G	A G	A G	G G	G G	G G	A G	A G	A G	A G	A A	A G	G G	G G	A G	A G	A G	A G	G G	A G	A G	G G	A G	A G	A A	A G	G G	A G	A G	A G	G G	A G
8	8_71935384	0	71935384	C C	C C	T C	T C	T C	T T	T C	C C	T C	T C	C C	C C	T T	T C	T C	T C	T C	T C	T T	T C	T C	T C	T C	T C	C C	T C	T C	T C	C C	T C	T C	T T
8	8_71970449	0	71970449	C C	C C	T T	T C	T C	T T	T T	C C	T C	T T	C C	C C	T T	T C	T C	T C	T C	T C	T T	C C	C C	T C	T C	T C	C C	T C	T C	T C	C C	T C	T C	T T
8	8_71971062	0	71971062	G G	G G	G G	G G	G G	G G	G G	G G	A G	G G	A G	A G	G G	G G	A G	G G	G G	G G	G G	A G	G G	G G	A G	G G	G G	A G	G G	A G	A G	A G	G G	G G
8	8_71974532	0	71974532	G G	G G	A G	G G	G G	G G	A G	G G	G G	A G	G G	G G	G G	G G	G G	G G	G G	A G	G G	G G	G G	G G	G G	G G	G G	G G	A G	A G	G G	G G	G G	G G
8	8_72040739	0	72040739	C C	C C	T T	C T	C T	T T	T T	C T	T T	T T	T T	C T	T T	C T	T T	C C	T T	C T	T T	C T	C C	C T	C T	T T	C T	T T	C C	C T	C T	T T	C T	C T
8	8_72093918	0	72093918	G G	G G	G G	G G	G G	G G	G G	G G	A G	G G	A G	A G	G G	G G	A G	G G	G G	G G	G G	A G	G G	G G	A G	G G	G G	A G	G G	A G	A G	A G	G G	G G
8	8_72171203	0	72171203	C C	C C	C C	C C	C C	C C	C C	C C	C C	C C	C C	C C	C C	C C	C C	C C	C C	C C	T C	C C	C C	C C	C C	C C	C C	C C	C C	C C	C C	C C	C C	C C
8	8_72207017	0	72207017	T C	T C	T C	C C	T C	C C	T C	C C	C C	T C	C C	C C	C C	C C	C C	C C	C C	T C	C C	T C	T T	C C	C C	C C	T C	C C	T T	T C	T C	C C	C C	C C
8	8_72275101	0	72275101	G A	G A	A A	A A	G A	A A	A A	G A	G A	A A	G A	A A	A A	A A	G A	A A	G G	G A	G A	G G	G G	A A	G A	G G	G A	G A	G A	G A	G A	A A	A A	A A
8	8_72329709	0	72329709	C T	C T	T T	T T	C T	T T	T T	C T	C T	T T	C T	T T	T T	T T	C T	T T	C C	C T	C T	C C	C C	T T	C T	C C	C T	C T	C T	C T	C T	T T	T T	T T
8	8_72331625	0	72331625	G A	G A	A A	A A	G A	A A	A A	G A	G A	A A	G A	A A	A A	A A	G A	A A	G G	G A	G A	G G	G G	A A	G A	G G	G A	G A	G A	G A	G A	A A	A A	A A
8	8_72333118	0	72333118	A G	A G	G G	G G	A G	G G	G G	A G	G G	G G	A G	G G	G G	G G	G G	G G	A A	A G	A G	G G	A G	G G	G G	A A	A G	G G	A G	G G	G G	G G	G G	G G
8	8_72371638	0	72371638	G G	A G	G G	A G	G G	G G	G G	G G	A G	G G	G G	A G	G G	G G	A G	G G	G G	A G	G G	A G	G G	G G	A G	G G	G G	A G	A G	A A	G G	G G	A G	G G
8	8_72425385	0	72425385	G G	G G	G G	G G	G G	G G	G G	G G	G G	G G	G G	G G	G G	G G	G G	G G	G G	G G	G G	T G	T G	G G	G G	G G	G G	G G	G G	G G	G G	G G	G G	G G
8	8_72519933	0	72519933	T T	T T	T T	T T	T T	T T	T T	T T	T T	T T	T T	T T	T T	T T	T T	T T	T T	T T	T T	G T	G T	T T	T T	T T	T T	T T	T T	T T	T T	T T	T T	T T
8	8_72520031	0	72520031	T T	T T	T T	T T	T T	T T	T T	T T	T T	T T	T T	T T	T T	T T	T T	T T	T T	T T	T T	C T	C T	T T	T T	T T	T T	T T	T T	T T	T T	T T	T T	T T
8	8_72551731	0	72551731	A A	G A	A A	G A	G A	A A	A A	A A	G A	A A	A A	G A	A A	A A	G A	A A	A A	A A	A A	G A	G A	A A	G A	A A	A A	G A	G G	G A	A A	A A	G A	A A
8	8_72581259	0	72581259	T T	T C	C C	C C	C C	C C	C C	T T	C C	C C	T C	C C	C C	T C	C C	T T	T C	C C	T C	T C	T C	T C	C C	T C	T C	C C	C C	C C	C C	C C	C C	C C
8	8_72584444	0	72584444	T T	T T	G G	T G	G G	G G	G G	T T	T G	G G	T G	T G	G G	T G	T G	T T	T G	G G	T G	T T	T G	T G	T T	T G	T G	T G	T G	T G	G G	G G	T G	T G
8	8_72622799	0	72622799	T T	T T	T T	T T	C T	T T	T T	C T	T T	T T	C T	T T	T T	T T	T T	C T	C T	T T	T T	T T	C C	T T	T T	C T	C C	T T	C T	T T	C T	T T	T T	T T
8	8_72622863	0	72622863	G G	G G	G G	G G	A G	G G	G G	A G	G G	G G	A G	G G	G G	G G	G G	A G	A G	G G	G G	G G	A A	G G	G G	A G	A A	G G	A G	G G	A G	G G	G G	G G
8	8_72645173	0	72645173	C T	C T	T T	C T	C T	T T	T T	C T	C T	T T	T T	C T	T T	C T	C T	C C	T T	C C	C T	C T	C T	C T	C C	T T	C T	C T	C C	C C	C C	T T	C T	C T
8	8_72648371	0	72648371	G A	G A	G A	G A	G A	G G	G A	A A	G A	G A	G A	G A	G G	G A	G A	A A	A A	A A	G A	G A	A A	G A	A A	A A	A A	G A	A A	A A	A A	G G	G A	G A
8	8_72648844	0	72648844	T G	G G	G G	G G	G G	G G	G G	T G	G G	G G	G G	G G	G G	T G	G G	T T	G G	T G	G G	G G	G G	T G	G G	G G	T G	G G	G G	G G	T G	G G	G G	G G
8	8_72755001	0	72755001	T C	T C	C C	C C	C C	C C	C C	C C	C C	C C	C C	C C	C C	C C	C C	C C	C C	C C	C C	T C	C C	C C	C C	C C	C C	C C	C C	C C	C C	C C	C C	C C
8	8_72792917	0	72792917	A A	A A	A A	A A	A A	A A	A A	A A	A A	A A	A A	A A	A A	A A	A A	A A	A A	A A	A A	A A	A A	A A	A A	A A	A A	A A	A A	A A	A A	A A	A A	A A
8	8_72836390	0	72836390	G A	G G	A A	G A	A A	A A	A A	A A	A A	A A	A A	G A	A A	A A	A A	G A	G A	G A	G A	G G	A A	A A	G A	G A	A A	A A	A A	G A	A A	A A	G A	A A
8	8_72847237	0	72847237	G A	G G	A A	G A	A A	A A	A A	A A	A A	A A	A A	G A	A A	A A	A A	A A	A A	A A	A A	G G	A A	A A	G A	A A	A A	A A	A A	A A	A A	A A	G A	A A
8	8_72934000	0	72934000	G G	G G	G G	G G	G G	G G	G G	G G	G G	G G	G G	G G	G G	G G	G G	A G	G G	A G	G G	G G	G G	G G	G G	G G	G G	G G	G G	A G	G G	G G	G G	G G
8	8_72966505	0	72966505	A A	A A	G G	A G	G G	G G	G G	A G	A G	G G	G G	A G	G G	A G	A G	A A	G G	A G	A G	A A	G G	A G	A A	G G	A G	A G	A G	A A	A A	G G	A G	A G
8	8_73000251	0	73000251	T T	T T	T T	T T	C T	T T	T T	T T	T T	T T	T T	T T	T T	T T	T T	T T	T T	T T	T T	T T	C T	T T	T T	T T	T T	T T	C T	T T	T T	T T	T T	T T
8	8_73009557	0	73009557	C T	C C	T T	C T	T T	T T	T T	T T	T T	T T	T T	C T	T T	T T	T T	T T	T T	T T	T T	C C	T T	T T	C T	T T	T T	T T	T T	T T	T T	T T	C T	T T
8	8_73050941	0	73050941	C C	C C	T C	C C	C C	C C	T C	C C	C C	T C	C C	C C	C C	C C	C C	C C	C C	T C	C C	C C	C C	C C	C C	C C	C C	C C	C C	C C	C C	C C	C C	C C
8	8_73183865	0	73183865	G A	A A	G A	A A	A A	A A	G A	G A	G A	G A	A A	A A	A A	G A	G A	G G	G A	G G	A A	A A	A A	G A	G A	G A	G A	G A	G A	G G	G G	A A	A A	G A
8	8_73188285	0	73188285	C T	T T	C T	T T	T T	T T	C T	C T	C T	C T	T T	T T	T T	C T	C T	C C	C T	C C	T T	T T	T T	C T	C T	C T	C T	C T	C T	C C	C C	T T	T T	C T
8	8_73318402	0	73318402	G G	A G	G G	A G	G G	G G	G G	G G	G G	G G	G G	A G	G G	G G	G G	G G	G G	G G	G G	A A	G G	G G	A G	G G	G G	G G	G G	G G	G G	G G	A G	G G
8	8_73322077	0	73322077	C T	C T	T T	T T	T T	T T	T T	T T	T T	T T	T T	T T	T T	T T	T T	C T	T T	T T	T T	T T	T T	T T	T T	T T	T T	T T	T T	T T	T T	T T	T T	T T
8	8_73322306	0	73322306	C T	C T	T T	T T	T T	T T	T T	T T	T T	T T	T T	T T	T T	T T	T T	C T	T T	T T	T T	T T	T T	T T	T T	T T	T T	T T	T T	T T	T T	T T	T T	T T
8	8_73322487	0	73322487	A A	G A	G A	G G	G A	G G	G A	A A	G A	G A	G A	G G	G G	G A	G A	A A	A A	A A	G A	G G	A A	G A	G A	A A	A A	G A	A A	A A	A A	G G	G G	G A
8	8_73359894	0	73359894	T C	T C	T C	C C	T C	C C	T C	T C	C C	T C	T C	C C	C C	C C	C C	T C	T C	T C	C C	C C	T T	C C	C C	T C	T C	C C	T C	C C	C C	C C	C C	C C
8	8_73535945	0	73535945	C C	C C	T C	T C	T T	T T	T C	C C	T C	T C	T C	T C	T T	T C	T C	C C	C C	C C	T T	C C	T C	T C	C C	C C	T C	T C	T C	C C	T C	T T	T C	T C
8	8_73538644	0	73538644	T C	C C	C C	T C	C C	C C	C C	T T	C C	C C	T C	T C	C C	T C	C C	T C	T T	C C	C C	T C	T C	T C	T C	T T	T C	C C	C C	C C	C C	C C	T C	C C
8	8_73538851	0	73538851	G G	G G	A G	A G	A A	A A	A G	G G	A G	A G	A G	A G	A A	A G	A G	G G	G G	G G	A A	G G	A G	A G	G G	G G	A G	A G	A G	G G	A G	A A	A G	A G
8	8_73708262	0	73708262	G G	G G	G G	G G	A G	G G	G G	G G	G G	G G	G G	G G	G G	G G	G G	G G	G G	G G	G G	G G	A G	G G	G G	G G	G G	G G	A G	G G	G G	G G	G G	G G
8	8_73722898	0	73722898	T T	T T	T T	T T	C T	T T	T T	T T	T T	T T	T T	T T	T T	T T	T T	T T	T T	T T	T T	T T	C T	T T	T T	T T	T T	T T	C T	T T	T T	T T	T T	T T
8	8_73781255	0	73781255	T T	T T	C T	T T	C T	T T	C T	T T	T T	C T	T T	T T	T T	T T	T T	T T	T T	C T	T T	T T	C T	T T	T T	T T	T T	T T	C T	T T	T T	T T	T T	T T
8	8_73825113	0	73825113	G G	G G	T T	T G	T G	T T	T T	G G	T G	T T	T G	T G	T T	T G	T G	G G	G G	T G	T G	G G	G G	T G	G G	G G	G G	T G	G G	G G	G G	T T	T G	T G
8	8_73993712	0	73993712	C T	C T	C T	T T	T T	T T	C T	T T	T T	C T	T T	T T	T T	T T	T T	C T	T T	C T	T T	T T	T T	T T	T T	T T	T T	T T	T T	T T	T T	T T	T T	T T
8	8_74031996	0	74031996	A C	A C	A C	C C	A C	C C	A C	C C	C C	A C	C C	C C	C C	C C	C C	A C	C C	A A	A C	C C	A C	C C	C C	C C	C C	C C	A C	A C	C C	C C	C C	C C
8	8_74056773	0	74056773	A G	A G	A G	G G	G G	G G	A G	G G	G G	A G	G G	G G	G G	G G	G G	A G	G G	A G	G G	A G	G G	G G	G G	G G	G G	G G	G G	G G	G G	G G	G G	G G
8	8_74097199	0	74097199	G A	A A	A A	A A	A A	A A	A A	G A	A A	A A	A A	A A	A A	G A	A A	G A	A A	A A	A A	A A	A A	G A	A A	A A	A A	A A	A A	A A	A A	A A	A A	A A
8	8_74177025	0	74177025	C C	C C	A C	A C	A A	A A	A C	C C	A C	A C	A C	A C	A A	A C	A C	C C	C C	A C	A C	C C	A C	A C	C C	C C	A C	A C	A C	C C	A A	A A	A C	A C
8	8_74320365	0	74320365	A A	A A	A A	A A	G A	A A	A A	A A	A A	A A	A A	A A	A A	A A	A A	A A	A A	A A	A A	A A	G A	A A	A A	A A	A A	A A	G A	A A	A A	A A	A A	A A
8	8_74370991	0	74370991	A A	A A	A A	A A	G A	A A	A A	G A	A A	A A	G A	A A	A A	A A	A A	A A	G A	G G	G A	A A	G G	A A	A A	G A	G G	A A	G A	G A	G G	A A	A A	A A
8	8_74373246	0	74373246	C C	C C	C C	C C	T C	C C	C C	T C	C C	C C	T C	C C	C C	C C	C C	C C	T C	T T	T C	C C	T T	C C	C C	T C	T T	C C	T C	T C	T T	C C	C C	C C
8	8_74373372	0	74373372	T G	T G	G G	T G	G G	G G	G G	T G	T G	G G	G G	T G	G G	T G	T G	T G	G G	G G	G G	T G	G G	T G	T T	G G	G G	T G	T G	T G	G G	G G	T G	T G
8	8_74407508	0	74407508	T T	T T	T T	T T	T T	T T	T T	T T	T T	T T	T T	T T	T T	T T	T T	T T	G T	T T	T T	T T	T T	T T	T T	G T	T T	T T	T T	T T	T T	T T	T T	T T
8	8_74452995	0	74452995	G A	G A	A A	G A	A A	A A	A A	G A	G A	A A	A A	G A	A A	G A	G A	G A	A A	A A	A A	G A	A A	G A	G G	A A	A A	G A	G A	G A	A A	A A	G A	G A
8	8_74529311	0	74529311	T T	T T	T G	T G	T G	G G	T G	T G	T T	T G	G G	T G	G G	T G	T G	T T	G G	G G	G G	T T	T G	T G	T T	G G	G G	T T	T T	T G	G G	G G	T G	T G
8	8_74588673	0	74588673	A A	A A	A A	A A	A A	A A	A A	A A	A A	A A	A A	A A	A A	A A	A A	A A	G G	G G	G A	A A	G A	A A	A A	G A	G G	A A	A A	G A	G G	A A	A A	A A
8	8_74636810	0	74636810	C T	C T	C T	T T	T T	T T	C T	T T	T T	C T	T T	T T	T T	T T	T T	C T	C T	C T	C T	T T	T T	T T	T T	C T	T T	T T	T T	C T	T T	T T	T T	T T
8	8_74743951	0	74743951	G A	G A	A A	G A	A A	A A	A A	A A	A A	A A	A A	G A	A A	A A	A A	A A	G G	G A	A A	G A	G A	A A	G A	G A	G G	A A	A A	A A	G G	A A	G A	A A
8	8_74749648	0	74749648	C T	C T	T T	T T	T T	T T	T T	T T	T T	T T	T T	T T	T T	T T	T T	T T	C T	C T	T T	T T	C T	T T	T T	T T	C C	T T	T T	T T	C T	T T	T T	T T
8	8_74749814	0	74749814	G A	G A	A A	A A	A A	A A	A A	A A	A A	A A	A A	A A	A A	A A	A A	A A	G A	G A	A A	A A	G A	A A	A A	A A	G G	A A	A A	A A	G A	A A	A A	A A
8	8_74771514	0	74771514	A C	A A	C C	C C	C C	C C	C C	C C	A C	C C	C C	C C	C C	C C	A C	C C	A C	C C	C C	C C	A C	C C	A C	C C	A A	A C	A C	A C	A C	C C	C C	A C
8	8_74772569	0	74772569	C C	C C	A C	C C	C C	C C	A C	C C	C C	A C	C C	C C	C C	C C	C C	C C	A C	A A	C C	A C	C C	C C	C C	A C	C C	C C	C C	A C	C C	C C	C C	C C
8	8_74807406	0	74807406	A A	A A	A A	A A	A A	A A	A A	A A	A A	A A	A A	A A	A A	A A	A A	A A	A A	G A	A A	G A	A A	A A	A A	A A	A A	A A	A A	G A	A A	A A	A A	A A
8	8_74868493	0	74868493	T T	T T	T T	T T	T T	T T	T T	T T	T T	T T	T T	T T	T T	T T	T T	T T	T T	C T	T T	T T	T T	T T	T T	T T	T T	T T	T T	T T	T T	T T	T T	T T
8	8_74920710	0	74920710	T C	T C	T C	T C	T C	C C	T C	C C	C C	T C	C C	T C	C C	C C	C C	T C	T T	T C	T C	T C	T T	C C	T C	T C	T T	C C	T C	C C	T C	C C	T C	C C
8	8_74921184	0	74921184	C A	C A	C A	C A	C A	A A	C A	A A	A A	C A	A A	C A	A A	A A	A A	C A	C C	C A	C A	C A	C C	A A	C A	C A	C C	A A	C A	A A	C A	A A	C A	A A
8	8_74921271	0	74921271	A C	A C	A C	A C	A C	C C	A C	C C	C C	A C	C C	A C	C C	C C	C C	A C	A A	A C	A C	A C	A A	C C	A C	A C	A A	C C	A C	C C	A C	C C	A C	C C
8	8_74966765	0	74966765	A G	A G	G G	G G	G G	G G	G G	G G	G G	G G	G G	G G	G G	G G	G G	G G	A A	G G	G G	G G	A G	G G	G G	A G	A A	G G	G G	G G	A G	G G	G G	G G
8	8_75005123	0	75005123	T T	T T	C C	C C	C C	C C	C C	T C	T T	C C	C C	C C	C C	T C	T C	T C	T T	T C	C C	T C	T C	T C	T C	T C	T T	T T	T C	T T	T C	C C	C C	T C
8	8_75068730	0	75068730	G A	G G	A A	A A	A A	A A	A A	A A	G A	A A	A A	A A	A A	A A	G A	A A	G G	G G	A A	A A	G A	A A	G A	G A	G G	G A	G A	G G	G A	A A	A A	G A
8	8_75084667	0	75084667	C C	C C	T T	T C	T C	T T	T T	T C	C C	T T	T T	T C	T T	T C	T C	T C	C C	C C	T C	C C	C C	T C	C C	T C	C C	C C	C C	C C	C C	T T	T C	T C
8	8_75084725	0	75084725	C T	T T	T T	C T	C T	T T	T T	C T	C T	T T	T T	C T	T T	C T	T T	C T	T T	C C	T T	C C	C T	C T	C T	T T	T T	C T	C T	C T	C T	T T	C T	T T
8	8_75133514	0	75133514	T C	T C	C C	C C	C C	C C	C C	C C	C C	C C	C C	C C	C C	C C	C C	C C	T T	C C	C C	C C	T C	C C	C C	T C	T T	C C	C C	C C	T C	C C	C C	C C
8	8_75133761	0	75133761	G A	G A	A A	G A	G A	A A	A A	A A	A A	A A	A A	G A	A A	A A	A A	A A	G G	G G	G A	G G	G G	A A	G A	G A	G G	A A	G A	G A	G G	A A	G A	A A
8	8_75179786	0	75179786	T T	C T	T T	T T	T T	T T	T T	T T	C T	T T	T T	T T	T T	T T	C T	T T	T T	T T	T T	C T	T T	T T	C T	T T	T T	C T	C T	C T	T T	T T	T T	C T
8	8_75330676	0	75330676	G G	A G	G G	A G	G G	G G	G G	G G	A G	G G	G G	A G	G G	G G	A G	G G	G G	G G	G G	A G	G G	G G	A A	G G	G G	A G	A G	A G	G G	G G	A G	A G
8	8_75337484	0	75337484	G G	G G	A G	G G	A G	G G	A G	G G	G G	A G	G G	G G	G G	G G	G G	A G	G G	A G	G G	G G	A G	G G	G G	G G	G G	G G	A G	G G	G G	G G	G G	G G
8	8_75384170	0	75384170	G G	G G	G G	G G	G G	G G	G G	G G	G G	G G	G G	G G	G G	G G	G G	G G	G G	G G	A G	G G	G G	G G	G G	G G	G G	G G	G G	G G	G G	G G	G G	G G
8	8_75430047	0	75430047	T T	T C	C C	C C	C C	C C	C C	T C	T C	C C	C C	C C	C C	T C	C C	T C	T T	T C	C C	C C	T C	T C	C C	T C	T T	T C	C C	T C	T C	C C	C C	C C
8	8_75512353	0	75512353	C C	C C	C C	C C	C C	C C	C C	C C	C C	C C	C C	C C	C C	C C	C C	C C	C C	T C	T C	C C	C C	C C	C C	C C	C C	C C	C C	T C	C C	C C	C C	C C
8	8_75531521	0	75531521	G G	G G	G G	G G	G G	G G	G G	G G	G G	G G	G G	G G	G G	G G	G G	G G	G G	G G	A G	G G	G G	G G	G G	G G	G G	G G	G G	G G	G G	G G	G G	G G
8	8_75551132	0	75551132	G G	G G	G G	G G	G G	G G	G G	G G	G G	G G	G G	G G	G G	G G	G G	G G	G G	G G	A G	G G	G G	G G	G G	G G	G G	G G	G G	G G	G G	G G	G G	G G
8	8_75598955	0	75598955	C C	C C	C C	C C	C C	C C	C C	C C	C C	C C	C C	C C	C C	C C	C C	C C	C C	C C	T C	C C	C C	C C	C C	C C	C C	C C	C C	C C	C C	C C	C C	C C
8	8_75620315	0	75620315	C C	C C	C C	C C	C C	C C	C C	C C	C C	C C	C C	C C	C C	C C	C C	C C	C C	C C	T C	C C	C C	C C	C C	C C	C C	C C	C C	C C	C C	C C	C C	C C
8	8_75624576	0	75624576	A A	A A	A A	A A	A A	A A	A A	A A	A A	A A	A A	A A	A A	A A	A A	G A	G A	A A	A A	A A	0 0	A A	A A	A A	G G	A A	A A	A A	G A	A A	A A	A A
8	8_75695336	0	75695336	A G	A G	G G	G G	G G	G G	G G	G G	G G	G G	G G	G G	G G	G G	G G	A G	A G	A G	G G	A G	A G	G G	A G	G G	A A	G G	G G	A G	A G	G G	A G	G G
8	8_75721097	0	75721097	T C	T C	C C	C C	C C	C C	C C	C C	C C	C C	C C	C C	C C	C C	C C	C C	C C	C C	C C	C C	C C	C C	C C	C C	C C	C C	C C	C C	T C	C C	C C	C C
8	8_75723604	0	75723604	C C	C C	C C	C C	C C	C C	C C	C C	C C	C C	C C	C C	C C	C C	C C	C C	T C	C C	T C	T C	C C	C C	C C	T C	C C	C C	C C	C C	C C	C C	C C	C C
8	8_75806365	0	75806365	T T	T T	T T	T T	T T	T T	T T	T T	T T	T T	T T	T T	T T	T T	T T	T T	T T	C T	T T	C T	T T	T T	C T	T T	T T	T T	T T	C T	T T	T T	C T	T T
8	8_75835347	0	75835347	G A	G A	A A	G A	A A	A A	A A	A A	G A	A A	A A	G A	A A	A A	G A	G A	G A	G A	G A	G A	G A	A A	G G	A A	G G	G A	G A	G G	G G	A A	G A	G A
8	8_75839152	0	75839152	T C	T C	C C	T C	C C	C C	C C	C C	T C	C C	C C	T C	C C	C C	T C	T C	T C	T C	T C	T C	T C	C C	T T	C C	T T	T C	T C	T T	T T	C C	T C	T C
8	8_75850205	0	75850205	C T	C T	T T	C T	T T	T T	T T	T T	C T	T T	T T	C T	T T	T T	C T	C T	C T	C T	C T	C T	C T	T T	C C	T T	C C	C T	C T	C C	C C	T T	C T	C T
8	8_75918502	0	75918502	G G	G G	A G	G G	A G	G G	A G	G G	G G	A G	G G	G G	G G	G G	G G	G G	G G	A G	G G	G G	A G	G G	G G	G G	G G	G G	A G	G G	G G	G G	G G	G G
8	8_76028409	0	76028409	G A	G A	A A	A A	A A	A A	A A	G A	G A	A A	A A	A A	A A	G A	A A	G G	G A	A A	A A	A A	G A	G A	A A	A A	G G	G A	A A	A A	G G	A A	A A	A A
8	8_76036162	0	76036162	G G	G G	G G	G G	G G	G G	G G	G G	G G	G G	G G	G G	G G	G G	G G	G G	G G	A G	G G	A G	G G	G G	A G	G G	G G	G G	G G	A G	G G	G G	A G	G G
8	8_76087855	0	76087855	T T	T T	T T	G T	T T	T T	T T	T T	G T	T T	T T	G T	T T	T T	G T	G T	T T	T T	T T	T T	T T	T T	G G	T T	T T	G T	G T	G G	T T	T T	T T	G T
8	8_76108182	0	76108182	A A	A A	G G	G G	G A	G G	G G	G A	G A	G G	G G	G G	G G	G A	G G	G A	G A	A A	G A	A A	A A	G A	G A	G G	A A	G A	G A	G A	A A	G G	G A	G G
8	8_76168989	0	76168989	C C	C C	C C	C C	C C	C C	C C	C C	C C	C C	C C	C C	0 0	C C	C C	C C	C C	T C	C C	C C	C C	C C	C C	C C	C C	C C	C C	C C	C C	C C	C C	C C
8	8_76226110	0	76226110	G G	G G	G G	G G	G G	G G	G G	G G	G G	G G	G G	G G	G G	G G	G G	G G	G G	A A	G G	G G	G G	G G	G G	G G	G G	G G	G G	A G	G G	G G	G G	G G
8	8_76245567	0	76245567	G G	G G	G G	G G	G G	G G	G G	G G	G G	G G	G G	G G	G G	G G	G G	G G	G G	A A	G G	G G	G G	G G	G G	G G	G G	G G	G G	A G	G G	G G	G G	G G
8	8_76261288	0	76261288	G G	G G	G G	G G	G G	G G	G G	G G	G G	G G	G G	G G	G G	G G	G G	A G	A G	G G	G G	G G	G G	G G	G G	G G	A G	G G	G G	G G	A G	G G	G G	G G
8	8_76366665	0	76366665	C C	C C	C C	T C	C C	C C	C C	C C	T C	C C	C C	T C	C C	C C	T C	T C	C C	C C	C C	C C	C C	C C	T C	C C	C C	T C	T C	T C	C C	C C	C C	T C
8	8_76382634	0	76382634	T T	T T	T T	G T	T T	T T	T T	T T	G T	T T	T T	G T	T T	T T	G T	G T	T T	T T	T T	T T	T T	T T	G T	T T	T T	G T	G T	G T	T T	T T	T T	G T
8	8_76406841	0	76406841	G A	G A	A A	A A	A A	A A	A A	G A	G A	A A	A A	A A	A A	G A	A A	G A	A A	A A	A A	A A	A A	G A	A A	A A	A A	G A	A A	A A	A A	A A	A A	A A
8	8_76414093	0	76414093	T T	T T	T T	C T	T T	T T	T T	T T	C T	T T	T T	C T	T T	T T	C T	C T	T T	T T	T T	T T	T T	T T	C T	T T	T T	C T	C T	C T	T T	T T	T T	C T
8	8_76428404	0	76428404	T T	T T	T T	T T	T T	T T	T T	T T	T T	T T	T T	T T	T T	T T	T T	T T	T T	C T	T T	T T	T T	T T	T T	T T	T T	T T	T T	C T	T T	T T	T T	T T
8	8_76452337	0	76452337	C T	C T	T T	T T	T T	T T	T T	C T	C T	T T	T T	T T	T T	C T	T T	C T	C C	T T	T T	T T	T T	C T	T T	C T	C T	C T	T T	T T	C T	T T	T T	T T
8	8_76452445	0	76452445	G A	G A	A A	A A	A A	A A	A A	G A	G A	A A	A A	A A	A A	G A	A A	G A	A A	A A	A A	A A	A A	G A	A A	A A	A A	G A	A A	A A	A A	A A	A A	A A
8	8_76452932	0	76452932	C T	C T	T T	T T	T T	T T	T T	C T	C T	T T	T T	T T	T T	C T	T T	C T	T T	T T	T T	T T	T T	C T	T T	T T	T T	C T	T T	T T	T T	T T	T T	T T
8	8_76453629	0	76453629	C C	C C	C C	C C	C C	C C	C C	C C	C C	C C	C C	C C	C C	C C	C C	C C	T C	C C	C C	C C	C C	C C	C C	T C	C C	C C	C C	C C	C C	C C	C C	C C
8	8_76495755	0	76495755	T T	T T	T T	T T	T T	T T	T T	T T	T T	T T	T T	T T	T T	T T	T T	T T	C C	T T	T T	T T	T T	T T	T T	C T	C T	T T	T T	T T	C T	T T	T T	T T
8	8_76701573	0	76701573	G A	G A	A A	G A	A A	A A	A A	A A	G A	A A	A A	G A	A A	A A	G A	A A	A A	G G	A A	G A	G A	A A	G A	A A	G A	G A	G A	G G	G A	A A	A A	G A
8	8_76703146	0	76703146	G T	G T	T T	G T	T T	T T	T T	T T	G T	T T	T T	G T	T T	T T	G T	T T	T T	G G	T T	G T	G T	T T	G T	T T	G T	G T	G T	G G	G T	T T	T T	G T
8	8_76738675	0	76738675	G G	G G	A A	G A	A A	A A	A A	G A	G G	A A	A A	G A	A A	G A	G A	G A	A A	G G	G A	A A	A A	G A	G A	A A	A A	G G	G A	G G	A A	A A	A A	G A
8	8_76827729	0	76827729	A A	A A	G G	A G	G G	G G	G G	A G	A A	G G	G G	A G	G G	A G	A G	A G	A A	G G	G G	A G	G G	A G	A A	A G	A A	A A	A A	A G	A A	G G	A G	A G
8	8_76834873	0	76834873	G G	G G	G G	A G	A G	G G	G G	G G	A G	G G	G G	A G	G G	G G	A G	G G	G G	A A	A G	G G	A G	G G	A G	G G	G G	A G	A G	A A	G G	G G	G G	A G
8	8_76881530	0	76881530	T T	T T	C C	C T	C T	C T	C C	C T	T T	C C	C C	C T	C C	C T	C T	T T	C T	T T	C T	T T	T T	C T	T T	C C	T T	T T	T T	T T	T T	C C	C T	T T
8	8_76925194	0	76925194	C C	C C	C C	C C	C C	C C	C C	C C	C C	C C	C C	C C	C C	C C	C C	C C	T C	C C	C C	T C	C C	C C	C C	C C	T C	C C	C C	C C	T C	C C	C C	C C
8	8_76961421	0	76961421	T G	T G	G G	T G	G G	G G	G G	G G	T G	G G	G G	T G	G G	G G	T G	T G	G G	G G	T G	G G	G G	G G	T G	G G	T G	T G	T G	T G	T G	G G	G G	T G
8	8_76988499	0	76988499	T T	T T	G G	G T	G T	G T	G G	G T	T T	G G	G G	G T	G G	G T	G T	T T	G G	T T	G T	G T	G T	G T	T T	G G	G T	T T	T T	T T	G T	G G	G T	T T
8	8_77061120	0	77061120	A A	A A	A A	A A	A A	A A	A A	A A	A A	A A	A A	A A	A A	A A	A A	A A	A A	A A	A A	A A	G A	A A	A A	A A	A A	A A	A A	A A	A A	A A	A A	A A
8	8_77073279	0	77073279	T T	T T	T T	T T	T T	T T	T T	T T	T T	T T	T T	T T	T T	T T	T T	T T	T T	T T	T T	T T	C T	T T	T T	T T	T T	T T	T T	T T	T T	T T	T T	T T
8	8_77117097	0	77117097	G A	G A	A A	A A	G A	G A	A A	G A	G A	A A	A A	A A	A A	G A	A A	G A	A A	A A	A A	A A	G A	G A	A A	A A	A A	G A	A A	A A	A A	A A	A A	G A
8	8_77165674	0	77165674	G G	G G	G G	A G	G G	G G	G G	G G	A G	G G	G G	A G	G G	G G	A G	G G	G G	G G	A G	A G	A G	G G	A A	G G	G G	A G	A A	A G	G G	G G	A G	A G
8	8_77261208	0	77261208	C T	C T	T T	T T	C T	C T	T T	C T	C T	T T	T T	T T	T T	C T	T T	C T	C C	T T	T T	C T	C T	C T	T T	C T	C T	C T	T T	T T	C T	T T	T T	C T
8	8_77274763	0	77274763	T C	T C	C C	C C	T C	T C	C C	T C	T C	C C	C C	C C	C C	T C	C C	T C	T T	C C	C C	C C	T C	T C	C C	T C	T C	T C	C C	C C	T C	C C	C C	T C
8	8_77293770	0	77293770	T C	T C	C C	C C	T C	T C	C C	T C	T C	C C	C C	C C	C C	T C	C C	T C	C C	C C	C C	C C	T C	T C	C C	C C	C C	T C	C C	C C	C C	C C	C C	T C
8	8_77352301	0	77352301	T C	T C	C C	C C	T C	T C	C C	T C	T C	C C	C C	C C	C C	T C	C C	T T	T T	T T	C C	T C	T T	T C	T C	T C	T T	T C	T C	T C	T T	C C	T C	T C
8	8_77352315	0	77352315	C A	C A	A A	A A	C A	C A	A A	C A	C A	A A	A A	A A	A A	C A	A A	C C	C C	C C	A A	C A	C C	C A	C A	C A	C C	C A	C A	C A	C C	A A	C A	C A
8	8_77394674	0	77394674	T C	T C	C C	C C	T C	T C	C C	T C	T C	C C	C C	C C	C C	T C	C C	T T	T T	T T	C C	T T	T T	T C	T C	T C	T C	T C	T C	T C	T C	C C	T C	T C
8	8_77398202	0	77398202	A G	A G	G G	G G	A G	A G	G G	A G	A G	G G	G G	G G	G G	A G	G G	A A	A A	A A	G G	A A	A A	A G	A G	A G	A G	A G	A G	A G	A G	G G	A G	A G
8	8_77453567	0	77453567	C T	C T	C C	C T	C T	C T	C C	C T	T T	C C	C C	C T	C C	C T	C T	T T	C T	T T	C T	T T	T T	C T	T T	C T	C T	T T	T T	T T	C T	C C	C T	T T
8	8_77464622	0	77464622	T C	T C	T T	T C	T C	T C	T T	T C	C C	T T	T T	T C	T T	T C	T C	C C	C C	C C	T C	C C	C C	T C	C C	T C	C C	C C	C C	C C	C C	T T	T C	C C
8	8_77482102	0	77482102	A C	A C	C C	C C	A C	A C	C C	A C	A C	C C	C C	C C	C C	A C	C C	A C	A C	A A	C C	A A	A A	A C	A C	A C	C C	A C	A C	A C	C C	C C	A C	A C
8	8_77637014	0	77637014	A A	A A	A A	G A	A A	A A	A A	A A	G A	A A	A A	G A	A A	A A	G A	G A	A A	A A	G A	G G	A A	A A	G G	A A	G A	G A	G G	G A	G A	A A	G A	G A
8	8_77692947	0	77692947	C T	C T	C C	C T	C T	C T	C C	C T	T T	C C	C C	C T	C C	C T	C T	T T	C T	T T	C T	T T	T T	C T	T T	C T	C T	T T	T T	T T	C T	C C	C T	T T
8	8_77693140	0	77693140	A A	A A	A A	G A	A A	A A	A A	A A	G A	A A	A A	G A	A A	A A	G A	A A	A A	A A	G A	A A	A A	A A	G A	A A	A A	G A	G A	G A	A A	A A	A A	G A
8	8_77742998	0	77742998	A C	A C	C C	A C	A C	A C	C C	A C	A A	C C	C C	A C	C C	A C	A C	A A	A C	A A	A C	C C	A C	A C	A C	A C	C C	A A	A C	A A	C C	C C	C C	A A
8	8_77771193	0	77771193	G G	G G	G G	G G	G G	G G	G G	G G	G G	G G	G G	G G	G G	G G	G G	G G	G G	G G	G G	G G	G G	G G	G G	G G	G G	G G	G G	G G	G G	G G	G G	G G
8	8_77867589	0	77867589	G G	G G	G G	G G	G G	G G	G G	G G	G G	G G	G G	G G	G G	G G	G G	G G	G G	G G	G G	G G	A G	G G	G G	G G	G G	G G	G G	G G	G G	G G	G G	G G
8	8_77895435	0	77895435	T T	T T	T T	C T	T T	T T	T T	T T	C T	T T	T T	C T	T T	T T	C T	T T	T T	T T	C T	T T	T T	T T	C T	T T	T T	C T	T T	C T	T T	T T	T T	C T
8	8_77927131	0	77927131	C C	C C	C C	C C	C C	C C	C C	C C	C C	C C	C C	C C	C C	C C	C C	T C	T C	T T	C C	T T	T C	C C	T C	C C	T T	C C	T T	T C	T T	C C	T C	C C
[truncated: 367 more rows]

## Sheet: Sheet2
NAD6_CON2	CON44	0	0	1	2
NAD6_CON2	CON45	0	0	1	2
NAD6_CON2	CON70	0	0	2	2
NAD6_CON2	CON91	0	0	2	-9
Conn_Rho3	CON1	0	0	1	2
Conn_Rho3	CON6	0	0	2	1
Conn_Rho3	CON10	0	0	2	-9
Conn_Rho3	CON15	0	0	1	1
Conn_Rho3	CON19	0	0	2	2
Conn_Rho3	CON25	0	0	2	2
Conn_Rho3	CON30	0	0	2	2
Conn_Rho3	CON35	0	0	1	-9
Conn_Rho3	CON40	0	0	2	1
Conn_Rho3	CON2	0	0	2	2
Conn_Rho3	CON7	0	0	2	1
Conn_Rho3	CON11	0	0	2	1
Conn_Rho3	CCON16	0	0	2	-9
Conn_Rho3	CON20	0	0	2	1
Conn_Rho3	CON26	0	0	2	2
Conn_Rho3	CON31	0	0	2	2
Conn_Rho3	CON37	0	0	2	1
Conn_Rho3	CON41	0	0	1	1
Conn_Rho3	CON3	0	0	1	2
Conn_Rho3	CON8	0	0	1	-9
Conn_Rho3	CON13	0	0	2	1
Conn_Rho3	CON17	0	0	2	1
Conn_Rho3	CON22	0	0	2	2
Conn_Rho3	CON27	0	0	2	1
Conn_Rho3	CON32	0	0	2	2
Conn_Rho3	CON38	0	0	2	1
Conn_Rho3	CON42	0	0	1	1
Conn_Rho3	CON4	0	0	2	-9
Conn_Rho3	CON9	0	0	2	1
Conn_Rho3	CON14	0	0	1	-9
Conn_Rho3	CON18	0	0	2	1
Conn_Rho3	CON24	0	0	2	2
Conn_Rho3	CON29	0	0	2	2
Conn_Rho3	CON34	0	0	1	1
Conn_Rho3	CON39	0	0	2	-9
Conn_Rho3	CON43	0	0	2	1
